# Supplementary material for: A Systems Biology Approach Identifies a R2R3 MYB Gene Subfamily with Distinct and Overlapping Functions in Regulation of Aliphatic Glucosinolates
Source: PLoS One. 2007 Dec 19;2(12):e1322. doi: 10.1371/journal.pone.0001322 (PMC2147653; doi:10.1371/journal.pone.0001322)
Supplement: Table S4 — Myb coexpression list (0.42 MB XLS) [file pone.0001322.s005.xls]

## Sheet: Table S4 -Myb coexpression list
Table S4. List of Top300 genes co-expressed with MYB28, MYB29 and MYB76.
Each subtable shows the top 300 list of genes co-expressed with MYB28, MYB29 and MYB76 as produced by ATTEDII (http://www.atted.bio.titech.ac.jp/ (Obayashi et al. 2007)).
Supplemental reference: Obayashi T, Kinoshita K, Nakai K, Shibaoka M, Hayashi S, Saeki M, Shibata D, Saito K, Ohta H (2007) ATTED-II: a database of co-expressed genes and cis elements for identifying co-regulated gene groups in Arabidopsis. Nucleic Acids Res 35: D863-D869.
Top 300 correlated genes to At5g61420					Top 300 correlated genes to At5g07690					Top 300 correlated genes to At5g07700
rank	correl	locus	function		rank	correl	locus	function		rank	correl	locus	function
0	1	At5g61420	myb family transcription factor (MYB28)		0	1	At5g07690	myb family transcription factor (MYB29)		0	1	At5g07700	myb family transcription factor (MYB76)
1	0.8	At4g13770	cytochrome P450 family protein		1	0.8	At1g65860	flavin-containing monooxygenase family protein / FMO family protein		1	0.49	At3g15910	hypothetical protein
2	0.78	At3g58990	aconitase C-terminal domain-containing protein		2	0.72	At1g62560	flavin-containing monooxygenase family protein / FMO family protein		2	0.49	At3g42770	F-box family protein
3	0.77	At4g12030	bile acid:sodium symporter family protein		3	0.69	At1g16410	cytochrome P450, putative		3	0.49	At3g43500	hypothetical protein
4	0.76	At1g74090	sulfotransferase family protein		4	0.68	At4g12030	bile acid:sodium symporter family protein		4	0.48	At5g07690	myb family transcription factor (MYB29)
5	0.74	At2g43100	aconitase C-terminal domain-containing protein		5	0.65	At2g43100	aconitase C-terminal domain-containing protein		5	0.48	At5g49250	hypothetical protein
6	0.72	At2g31790	UDP-glucoronosyl/UDP-glucosyl transferase family protein		6	0.65	At3g03190	glutathione S-transferase, putative		6	0.47	At2g06820	expressed protein
7	0.71	At3g03190	glutathione S-transferase, putative		7	0.62	At3g58990	aconitase C-terminal domain-containing protein		7	0.47	At4g10690	copia-like retrotransposon family
8	0.7	At5g23010	2-isopropylmalate synthase 3 (IMS3)		8	0.61	At3g19710	branched-chain amino acid aminotransferase, putative / branched-chain amino acid transaminase, putative (BCAT4)		8	0.47	At1g62110	mitochondrial transcription termination factor family protein / mTERF family protein
9	0.68	At3g19710	branched-chain amino acid aminotransferase, putative / branched-chain amino acid transaminase, putative (BCAT4)		9	0.6	At5g23010	2-isopropylmalate synthase 3 (IMS3)		9	0.47	At2g14640	gypsy-like retrotransposon family
10	0.67	At1g16410	cytochrome P450, putative		10	0.6	At4g13770	cytochrome P450 family protein		10	0.47	At3g49480	hypothetical protein
11	0.67	At1g62560	flavin-containing monooxygenase family protein / FMO family protein		11	0.58	At1g74090	sulfotransferase family protein		11	0.46	At5g19810	proline-rich extensin-like family protein
12	0.67	At1g31180	3-isopropylmalate dehydrogenase, chloroplast, putative		12	0.58	At3g02020	aspartate kinase, lysine-sensitive, putative		12	0.46	At3g42300	hypothetical protein
13	0.65	At3g45160	expressed protein		13	0.58	At1g56430	nicotianamine synthase, putative		13	0.46	At1g65860	flavin-containing monooxygenase family protein / FMO family protein
14	0.65	At3g02020	aspartate kinase, lysine-sensitive, putative		14	0.57	At2g18300	basic helix-loop-helix (bHLH) family protein		14	0.46	At1g43570	hypothetical protein
15	0.63	At1g73600	phosphoethanolamine N-methyltransferase 3, putative (NMT3)		15	0.57	At2g30790	photosystem II oxygen-evolving complex 23, putative		15	0.46	At4g04650	hypothetical protein
16	0.63	At4g00880	auxin-responsive family protein		16	0.56	At5g63180	pectate lyase family protein		16	0.46	At5g04400	no apical meristem (NAM) family protein
17	0.62	At4g13430	aconitase family protein / aconitate hydratase family protein		17	0.56	At5g61420	myb family transcription factor (MYB28)		17	0.46	At5g07050	nodulin MtN21 family protein
18	0.61	At1g18590	sulfotransferase family protein		18	0.56	At2g31790	UDP-glucoronosyl/UDP-glucosyl transferase family protein		18	0.45	At4g03060	2-oxoglutarate-dependent dioxygenase, putative (AOP2)
19	0.6	At1g31230	bifunctional aspartate kinase/homoserine dehydrogenase / AK-HSDH		19	0.56	At4g03060	2-oxoglutarate-dependent dioxygenase, putative (AOP2)		19	0.45	At1g34440	hypothetical protein
20	0.58	At3g01120	cystathionine gamma-synthase, chloroplast / O-succinylhomoserine (Thiol)-lyase (CGS)		20	0.55	At1g31180	3-isopropylmalate dehydrogenase, chloroplast, putative		20	0.45	At2g16410	hypothetical protein
21	0.58	At1g56430	nicotianamine synthase, putative		21	0.55	At1g14700	purple acid phosphatase, putative		21	0.45	At2g28580	hypothetical protein
22	0.58	At3g63110	adenylate isopentenyltransferase 3 / cytokinin synthase (IPT3)		22	0.55	At4g12310	cytochrome P450, putative		22	0.45	At3g27590	hypothetical protein
23	0.57	At4g12310	cytochrome P450, putative		23	0.54	At5g10180	sulfate transporter		23	0.45	At1g50350	hypothetical protein
24	0.57	At3g46130	myb family transcription factor (MYB48)		24	0.53	At2g42610	expressed protein		24	0.45	At1g44510	copia-like retrotransposon family
25	0.56	At5g07690	myb family transcription factor (MYB29)		25	0.53	At5g64770	expressed protein		25	0.44	At2g01240	reticulon family protein (RTNLB15)
26	0.56	At1g12280	disease resistance protein (CC-NBS-LRR class), putative		26	0.52	At2g20570	golden2-like transcription factor (GLK1)		26	0.44	At5g05150	transport protein-related
27	0.56	At1g66820	glycine-rich protein		27	0.52	At1g18590	sulfotransferase family protein		27	0.44	At2g14830	expressed protein
28	0.56	At3g57050	cystathionine beta-lyase, chloroplast / beta-cystathionase / cysteine lyase (CBL)		28	0.52	At3g52720	carbonic anhydrase family protein		28	0.44	At3g28020	hypothetical protein
29	0.55	At2g46650	cytochrome b5, putative		29	0.52	At2g15050	lipid transfer protein, putative		29	0.44	At1g42650	pseudogene, hypothetical protein
30	0.55	At2g35810	expressed protein		30	0.52	At4g17370	oxidoreductase family protein		30	0.44	At2g07070	AT hook motif-containing protein
31	0.54	At1g65860	flavin-containing monooxygenase family protein / FMO family protein		31	0.51	At4g17360	formyltetrahydrofolate deformylase, putative		31	0.44	At3g49440	F-box family protein-related
32	0.54	At2g36430	expressed protein		32	0.51	At2g39850	subtilase family protein		32	0.44	At4g05240	ubiquitin family protein
33	0.54	At4g17880	basic helix-loop-helix (bHLH) family protein		33	0.51	At4g21760	glycosyl hydrolase family 1 protein		33	0.44	At4g19300	hypothetical protein
34	0.54	At1g21440	mutase family protein		34	0.51	At1g28610	GDSL-motif lipase, putative		34	0.44	At1g23270	hypothetical protein
35	0.54	At5g04950	nicotianamine synthase, putative		35	0.51	At2g44210	expressed protein		35	0.44	At1g43220	pseudogene, hypothetical protein
36	0.54	At2g20610	aminotransferase, putative		36	0.51	At2g22540	short vegetative phase protein (SVP)		36	0.44	At1g53810	copia-like retrotransposon family
37	0.53	At3g49680	branched-chain amino acid aminotransferase 3 / branched-chain amino acid transaminase 3 (BCAT3)		37	0.5	At1g29660	GDSL-motif lipase/hydrolase family protein		37	0.44	At1g57830	Toll-Interleukin-Resistance (TIR) domain-containing protein
38	0.53	At4g09620	expressed protein		38	0.5	At5g61660	glycine-rich protein		38	0.44	At5g16580	glycosyl hydrolase family 1 protein
39	0.53	At2g17820	histidine kinase 1		39	0.5	At3g46490	oxidoreductase, 2OG-Fe(II) oxygenase family protein		39	0.44	At5g25860	F-box family protein
40	0.53	At5g46270	disease resistance protein (TIR-NBS-LRR class), putative		40	0.5	At1g78370	glutathione S-transferase, putative		40	0.44	At5g48050	hypothetical protein
41	0.52	At1g78370	glutathione S-transferase, putative		41	0.49	At3g45160	expressed protein		41	0.44	At1g54480	leucine-rich repeat family protein
42	0.52	At4g17360	formyltetrahydrofolate deformylase, putative		42	0.49	At3g45780	protein kinase / nonphototropic hypocotyl protein 1 (NPH1) / phototropin		42	0.44	At3g44800	meprin and TRAF homology domain-containing protein / MATH domain-containing protein
43	0.52	At5g33280	chloride channel-like (CLC) protein, putative		43	0.49	At4g14040	selenium-binding protein, putative		43	0.44	At5g44850	hypothetical protein
44	0.52	At3g43800	glutathione S-transferase, putative		44	0.49	At2g32860	glycosyl hydrolase family 1 protein		44	0.44	At2g20460	copia-like retrotransposon family
45	0.52	At1g66140	zinc finger (C2H2 type) family protein		45	0.49	At1g17700	prenylated rab acceptor (PRA1) family protein		45	0.44	At3g58860	F-box family protein
46	0.52	At2g23590	hydrolase, alpha/beta fold family protein		46	0.49	At2g29970	heat shock protein-related		46	0.44	At5g11080	ubiquitin family protein
47	0.52	At3g28080	nodulin MtN21 family protein		47	0.49	At5g14090	hypothetical protein		47	0.44	At5g54350	expressed protein
48	0.51	At5g10030	bZIP family transcription factor (OBF4)		48	0.48	At2g34620	mitochondrial transcription termination factor-related / mTERF-related		48	0.43	At2g10740	gypsy-like retrotransposon family (Athila)
49	0.51	At2g21210	auxin-responsive protein, putative		49	0.48	At3g48720	transferase family protein		49	0.43	At1g77960	hypothetical protein
50	0.51	At1g79870	oxidoreductase family protein		50	0.48	At5g07700	myb family transcription factor (MYB76)		50	0.43	At2g07700	gypsy-like retrotransposon family
51	0.51	At1g70890	major latex protein-related / MLP-related		51	0.48	At2g46650	cytochrome b5, putative		51	0.43	At5g26070	hydroxyproline-rich glycoprotein family protein
52	0.51	At1g24625	zinc finger (C2H2 type) family protein (ZFP7)		52	0.48	At5g28490	expressed protein		52	0.43	At1g09360	invertase/pectin methylesterase inhibitor family protein
53	0.51	At5g53370	pectinesterase family protein		53	0.48	At3g52840	beta-galactosidase, putative / lactase, putative		53	0.43	At4g24300	hypothetical protein
54	0.5	At2g41560	calcium-transporting ATPase 4, plasma membrane-type / Ca2+-ATPase, isoform 4 (ACA4)		54	0.47	At1g22630	expressed protein		54	0.43	At2g15410	gypsy-like retrotransposon family
55	0.5	At2g17265	homoserine kinase (HSK)		55	0.47	At1g73600	phosphoethanolamine N-methyltransferase 3, putative (NMT3)		55	0.43	At4g01190	phosphatidylinositol-4-phosphate 5-kinase family protein
56	0.5	At3g19370	expressed protein		56	0.47	At1g29720	protein kinase family protein		56	0.43	At5g28600	hypothetical protein
57	0.5	At5g49960	expressed protein		57	0.47	At1g80760	major intrinsic family protein / MIP family protein		57	0.43	At5g28860	hypothetical protein
58	0.5	At1g22630	expressed protein		58	0.47	At2g36870	xyloglucan:xyloglucosyl transferase, putative / xyloglucan endotransglycosylase, putative / endo-xyloglucan transferase, putative		58	0.43	At1g48095	hypothetical protein
59	0.5	At3g24160	expressed protein		59	0.47	At1g12280	disease resistance protein (CC-NBS-LRR class), putative		59	0.43	At2g36550	expressed protein
60	0.5	At5g63180	pectate lyase family protein		60	0.47	At3g19480	D-3-phosphoglycerate dehydrogenase, putative / 3-PGDH, putative		60	0.43	At3g09130	hypothetical protein
61	0.49	At1g77990	sulfate transporter		61	0.47	At3g54900	CAX-interacting protein 1 (CAXIP1)		61	0.43	At3g30240	hypothetical protein
62	0.49	At4g17370	oxidoreductase family protein		62	0.47	At1g05310	pectinesterase family protein		62	0.42	At2g16680	non-LTR retrotransposon family (LINE)
63	0.49	At4g39940	adenylylsulfate kinase 2 (AKN2)		63	0.46	At4g33000	calcineurin B-like protein 10 (CBL10)		63	0.42	At2g21930	F-box family protein
64	0.49	At1g78020	senescence-associated protein-related		64	0.46	At1g31230	bifunctional aspartate kinase/homoserine dehydrogenase / AK-HSDH		64	0.42	At1g18050	SWAP (Suppressor-of-White-APricot)/surp domain-containing protein
65	0.49	At1g04040	acid phosphatase class B family protein		65	0.46	At4g15510	photosystem II reaction center PsbP family protein		65	0.42	At4g04000	non-LTR retrotransposon family (LINE)
66	0.49	At1g37130	nitrate reductase 2 (NR2)		66	0.46	At5g56850	expressed protein		66	0.42	At4g07650	pseudogene, hypothetical protein
67	0.49	At1g65190	protein kinase family protein		67	0.46	At1g24625	zinc finger (C2H2 type) family protein (ZFP7)		67	0.42	At1g70110	lectin protein kinase family protein
68	0.49	At5g23920	expressed protein		68	0.45	At1g70890	major latex protein-related / MLP-related		68	0.42	At1g78740	hypothetical protein
69	0.49	At5g63710	leucine-rich repeat transmembrane protein kinase, putative		69	0.45	At4g24540	MADS-box family protein		69	0.42	At2g05200	non-LTR retrotransposon family (LINE)
70	0.49	At5g07580	ethylene-responsive element-binding family protein		70	0.45	At2g20610	aminotransferase, putative		70	0.42	At4g04660	pseudogene, hypothetical protein
71	0.49	At5g65010	asparagine synthetase 2 (ASN2)		71	0.45	At5g44190	myb family transcription factor (GLK2)		71	0.42	At5g20760	hypothetical protein
72	0.49	At2g18300	basic helix-loop-helix (bHLH) family protein		72	0.45	At2g23610	esterase, putative		72	0.42	At2g14380	gypsy-like retrotransposon family
73	0.49	At3g19400	cysteine proteinase, putative		73	0.45	At3g18890	expressed protein		73	0.42	At2g16000	copia-like retrotransposon family
74	0.48	At3g17650	oligopeptide transporter OPT family protein		74	0.45	At3g28080	nodulin MtN21 family protein		74	0.42	At2g26950	myb family transcription factor
75	0.48	At5g57930	expressed protein		75	0.45	At4g38840	auxin-responsive protein, putative		75	0.42	At3g42140	hypothetical protein
76	0.48	At1g31420	leucine-rich repeat transmembrane protein kinase, putative		76	0.45	At3g23295	expressed protein		76	0.42	At1g05920	hypothetical protein
77	0.48	At5g08370	alpha-galactosidase, putative / melibiase, putative / alpha-D-galactoside galactohydrolase, putative		77	0.45	At4g39940	adenylylsulfate kinase 2 (AKN2)		77	0.42	At2g24080	F-box family protein-related
78	0.48	At4g30993	expressed protein		78	0.45	At2g28550	AP2 domain-containing transcription factor RAP2.7 (RAP2.7)		78	0.42	At3g16160	tesmin/TSO1-like CXC domain-containing protein
79	0.48	At2g42070	MutT/nudix family protein		79	0.45	At3g62750	glycosyl hydrolase family 1 protein		79	0.42	At5g13620	expressed protein
80	0.48	At4g00780	meprin and TRAF homology domain-containing protein / MATH domain-containing protein		80	0.45	At4g10060	expressed protein		80	0.42	At1g03445	kelch repeat-containing protein / serine/threonine phosphoesterase family protein
81	0.48	At5g09460	expressed protein		81	0.45	At5g57345	expressed protein		81	0.42	At1g30470	SIT4 phosphatase-associated family protein
82	0.48	At5g40830	expressed protein		82	0.45	At2g43010	phytochrome-interacting factor 4 (PIF4) / basic helix-loop-helix protein 9 (bHLH9) / short under red-light 2 (SRL2)		82	0.42	At1g41860	hypothetical protein
83	0.48	At2g32480	membrane-associated zinc metalloprotease, putative		83	0.45	At2g21210	auxin-responsive protein, putative		83	0.42	At1g72860	disease resistance protein (TIR-NBS-LRR class), putative
84	0.48	At2g33050	leucine-rich repeat family protein		84	0.45	At3g59780	expressed protein		84	0.42	At1g75360	hypothetical protein
85	0.48	At2g42690	lipase, putative		85	0.45	At5g35490	expressed protein (MRU1)		85	0.42	At3g59790	mitogen-activated protein kinase, putative / MAPK, putative (MPK10)
86	0.47	At4g17770	glycosyl transferase family 20 protein / trehalose-phosphatase family protein		86	0.44	At3g49680	branched-chain amino acid aminotransferase 3 / branched-chain amino acid transaminase 3 (BCAT3)		86	0.42	At4g32370	glycoside hydrolase family 28 protein / polygalacturonase (pectinase) family protein
87	0.47	At4g19840	lectin-related		87	0.44	At1g22690	gibberellin-responsive protein, putative		87	0.42	At5g15380	cytosine methyltransferase, putative
88	0.47	At4g35760	expressed protein		88	0.44	At5g07460	peptide methionine sulfoxide reductase, putative		88	0.42	At4g08740	hypothetical protein
89	0.47	At1g29660	GDSL-motif lipase/hydrolase family protein		89	0.44	At2g29360	tropinone reductase, putative / tropine dehydrogenase, putative		89	0.42	At4g17710	homeobox-leucine zipper family protein / lipid-binding START domain-containing protein
90	0.47	At1g30910	molybdenum cofactor sulfurase family protein		90	0.44	At3g46780	expressed protein		90	0.42	At4g32810	dioxygenase-related
91	0.47	At4g21960	peroxidase 42 (PER42) (P42) (PRXR1)		91	0.44	At5g16030	expressed protein		91	0.42	At5g19720	tRNA synthetase class I (E and Q) family protein
92	0.47	At1g48600	phosphoethanolamine N-methyltransferase 2, putative (NMT2)		92	0.44	At1g29700	expressed protein		92	0.41	At5g61750	cupin family protein
93	0.47	At2g20725	CAAX amino terminal protease family protein		93	0.44	At3g15570	phototropic-responsive NPH3 family protein		93	0.41	At3g48830	polynucleotide adenylyltransferase family protein / RNA recognition motif (RRM)-containing protein
94	0.47	At2g37450	nodulin MtN21 family protein		94	0.43	At4g24700	expressed protein		94	0.41	At1g66220	subtilase family protein
95	0.47	At1g19710	glycosyl transferase family 1 protein		95	0.43	At1g75460	ATP-dependent protease La (LON) domain-containing protein		95	0.41	At2g11010	hypothetical protein
96	0.47	At1g54220	dihydrolipoamide S-acetyltransferase, putative		96	0.43	At3g23290	expressed protein		96	0.41	At2g33260	tryptophan/tyrosine permease family protein
97	0.47	At5g10180	sulfate transporter		97	0.43	At1g44446	chlorophyll a oxygenase (CAO) / chlorophyll b synthase		97	0.41	At4g05620	F-box family protein
98	0.47	At5g49980	transport inhibitor response protein, putative		98	0.43	At1g17970	zinc finger (C3HC4-type RING finger) family protein		98	0.41	At5g27910	CCAAT-box binding transcription factor Hap5a, putative
99	0.47	At1g04640	biotin/lipoate A/B protein ligase family protein		99	0.43	At1g54350	ABC transporter family protein		99	0.41	At2g01550	non-LTR retrotransposon family (LINE)
100	0.47	At1g75820	CLAVATA1 receptor kinase (CLV1)		100	0.43	At3g13740	URF 4-related		100	0.41	At2g13510	hypothetical protein
101	0.47	At5g15770	GCN5-related N-acetyltransferase (GNAT) family protein		101	0.43	At1g21440	mutase family protein		101	0.41	At1g34090	copia-like retrotransposon family
102	0.47	At5g26780	glycine hydroxymethyltransferase, putative / serine hydroxymethyltransferase, putative / serine/threonine aldolase, putative		102	0.43	At5g26330	plastocyanin-like domain-containing protein / mavicyanin, putative		102	0.41	At1g42450	Mutator-like transposase family
103	0.47	At2g01950	leucine-rich repeat transmembrane protein kinase, putative		103	0.43	At2g29310	tropinone reductase, putative / tropine dehydrogenase, putative		103	0.41	At1g43760	hypothetical protein
104	0.47	At2g46690	auxin-responsive family protein		104	0.43	At5g39080	transferase family protein		104	0.41	At2g15750	hypothetical protein
105	0.47	At5g67150	transferase family protein		105	0.43	At1g11350	S-locus lectin protein kinase family protein		105	0.41	At5g66220	chalcone-flavanone isomerase, putative / chalcone isomerase, putative (CHI)
106	0.47	At2g15620	ferredoxin--nitrite reductase, putative		106	0.43	At3g57050	cystathionine beta-lyase, chloroplast / beta-cystathionase / cysteine lyase (CBL)		106	0.41	At1g42360	pseudogene, hypothetical protein
107	0.46	At1g70230	expressed protein		107	0.43	At5g58390	peroxidase, putative		107	0.41	At1g78720	protein transport protein sec61, putative
108	0.46	At3g05270	expressed protein		108	0.43	At1g21500	expressed protein		108	0.41	At1g62890	hypothetical protein
109	0.46	At4g24780	pectate lyase family protein		109	0.43	At2g28605	expressed protein		109	0.41	At3g54060	hypothetical protein
110	0.46	At3g22104	phototropic-responsive NPH3 protein-related		110	0.43	At3g10060	immunophilin, putative / FKBP-type peptidyl-prolyl cis-trans isomerase, putative		110	0.41	At1g38340	gypsy-like retrotransposon family (Athila)
111	0.46	At3g25530	6-phosphogluconate dehydrogenase NAD-binding domain-containing protein		111	0.42	At1g31710	copper amine oxidase, putative		111	0.41	At2g38150	alpha 1,4-glycosyltransferase family protein / glycosyltransferase sugar-binding DXD motif-containing protein
112	0.46	At2g05830	eukaryotic translation initiation factor 2B family protein / eIF-2B family protein		112	0.42	At4g16990	disease resistance protein (TIR-NBS class), putative		112	0.41	At1g01690	expressed protein
113	0.46	At5g63780	zinc finger (C3HC4-type RING finger) family protein		113	0.42	At3g30340	nodulin MtN21 family protein		113	0.41	At1g55640	prenylated rab acceptor (PRA1) family protein
114	0.46	At1g68585	expressed protein		114	0.42	At4g01690	protoporphyrinogen oxidase (PPOX)		114	0.41	At2g29860	kelch repeat-containing F-box family protein
115	0.46	At3g01690	expressed protein		115	0.42	At4g13430	aconitase family protein / aconitate hydratase family protein		115	0.41	At5g39370	S-locus glycoprotein, putative
116	0.46	At4g37300	expressed protein		116	0.42	At1g23460	polygalacturonase, putative / pectinase, putative		116	0.41	At5g53640	F-box family protein
117	0.46	At5g09820	plastid-lipid associated protein PAP / fibrillin family protein		117	0.42	At4g14240	expressed protein		117	0.4	At1g62460	copia-like retrotransposon family
118	0.46	At5g64770	expressed protein		118	0.42	At4g27700	rhodanese-like domain-containing protein		118	0.4	At2g12250	pseudogene, hypothetical protein
119	0.46	At3g14410	transporter-related		119	0.42	At1g20810	immunophilin / FKBP-type peptidyl-prolyl cis-trans isomerase family protein		119	0.4	At3g42820	hypothetical protein
120	0.46	At5g53020	expressed protein		120	0.42	At5g45540	expressed protein		120	0.4	At4g38590	glycosyl hydrolase family 35 protein
121	0.46	At1g32070	GCN5-related N-acetyltransferase (GNAT) family protein / nuclear shuttle interacting protein (NSI)		121	0.42	At5g67150	transferase family protein		121	0.4	At2g15510	non-LTR retrotransposon family (LINE)
122	0.46	At3g07990	serine carboxypeptidase S10 family protein		122	0.42	At1g65230	expressed protein		122	0.4	At4g03370	ubiquitin family protein
123	0.46	At2g45790	eukaryotic phosphomannomutase family protein		123	0.42	At1g68585	expressed protein		123	0.4	At1g06320	hypothetical protein
124	0.46	At3g45780	protein kinase / nonphototropic hypocotyl protein 1 (NPH1) / phototropin		124	0.42	At2g01590	expressed protein		124	0.4	At1g13200	F-box family protein
125	0.46	At5g62720	integral membrane HPP family protein		125	0.42	At2g14750	adenylylsulfate kinase 1 (AKN1)		125	0.4	At2g27250	CLAVATA3
126	0.46	At1g72160	SEC14 cytosolic factor family protein / phosphoglyceride transfer family protein		126	0.42	At4g30993	expressed protein		126	0.4	At1g43715	copia-like retrotransposon family
127	0.46	At5g03430	phosphoadenosine phosphosulfate (PAPS) reductase family protein		127	0.42	At5g19940	plastid-lipid associated protein PAP-related / fibrillin-related		127	0.4	At3g06360	arabinogalactan-protein (AGP27)
128	0.46	At5g05960	protease inhibitor/seed storage/lipid transfer protein (LTP) family protein		128	0.42	At1g67840	ATP-binding region, ATPase-like domain-containing protein		128	0.4	At4g08130	hypothetical protein
129	0.46	At5g24165	expressed protein		129	0.42	At2g42220	rhodanese-like domain-containing protein		129	0.4	At1g12630	AP2 domain-containing protein
130	0.45	At4g12390	invertase/pectin methylesterase inhibitor family protein		130	0.42	At3g59060	basic helix-loop-helix (bHLH) family protein		130	0.4	At1g60450	galactinol synthase, putative
131	0.45	At5g49660	leucine-rich repeat transmembrane protein kinase, putative		131	0.42	At4g10770	oligopeptide transporter OPT family protein		131	0.4	At2g02550	exonuclease family protein
132	0.45	At2g39930	isoamylase, putative / starch debranching enzyme, putative		132	0.42	At4g37800	xyloglucan:xyloglucosyl transferase, putative / xyloglucan endotransglycosylase, putative / endo-xyloglucan transferase, putative		132	0.4	At2g14390	hypothetical protein
133	0.45	At3g44990	xyloglucan:xyloglucosyl transferase, putative / xyloglucan endotransglycosylase, putative / endo-xyloglucan transferase, putative		133	0.42	At5g13770	pentatricopeptide (PPR) repeat-containing protein		133	0.4	At2g34290	protein kinase family protein
134	0.45	At5g66040	senescence-associated family protein		134	0.42	At5g14260	SET domain-containing protein		134	0.4	At3g45820	hypothetical protein
135	0.45	At3g48720	transferase family protein		135	0.42	At5g66040	senescence-associated family protein		135	0.4	At4g14460	copia-like retrotransposon family
136	0.45	At5g53940	yippee family protein		136	0.42	At1g50730	expressed protein		136	0.4	At5g43800	copia-like retrotransposon family
137	0.45	At1g14700	purple acid phosphatase, putative		137	0.42	At3g06470	GNS1/SUR4 membrane family protein		137	0.4	At5g46140	hypothetical protein
138	0.45	At1g19920	sulfate adenylyltransferase 2 / ATP-sulfurylase 2 (ASA1) (MET3-1) (APS2)		138	0.41	At1g69080	universal stress protein (USP) family protein		138	0.4	At1g42220	CACTA-like transposase family (Ptta/En/Spm)
139	0.45	At2g35155	expressed protein		139	0.41	At2g42690	lipase, putative		139	0.4	At4g07890	gypsy-like retrotransposon family (Athila)
140	0.45	At1g47410	expressed protein		140	0.41	At2g46630	pseudogene, hypothetical protein		140	0.4	At5g50190	hypothetical protein
141	0.45	At1g28670	lipase		141	0.41	At2g04850	auxin-responsive protein-related		141	0.4	At5g50270	F-box family protein
142	0.45	At1g48030	dihydrolipoamide dehydrogenase 1, mitochondrial / lipoamide dehydrogenase 1 (MTLPD1)		142	0.41	At3g26490	phototropic-responsive NPH3 family protein		142	0.4	At2g17910	non-LTR retrotransposon family (LINE)
143	0.45	At1g48420	desulfhydrase family		143	0.41	At3g27690	chlorophyll A-B binding protein (LHCB2:4)		143	0.4	At5g18880	expressed protein
144	0.45	At1g49230	zinc finger (C3HC4-type RING finger) family protein		144	0.41	At4g15920	nodulin MtN3 family protein		144	0.4	At2g15660	hypothetical protein
145	0.45	At5g50420	expressed protein		145	0.41	At3g01680	expressed protein		145	0.4	At3g46570	glycosyl hydrolase family 17 protein
146	0.45	At2g24290	expressed protein		146	0.41	At3g44450	expressed protein		146	0.4	At1g22670	protease-associated zinc finger (C3HC4-type RING finger) family protein
147	0.45	At2g45180	protease inhibitor/seed storage/lipid transfer protein (LTP) family protein		147	0.41	At5g46270	disease resistance protein (TIR-NBS-LRR class), putative		147	0.4	At1g63200	hypothetical protein
148	0.45	At5g53170	FtsH protease, putative		148	0.41	At1g18810	phytochrome kinase substrate-related		148	0.4	At2g26130	zinc finger (C3HC4-type RING finger) family protein
149	0.45	At1g21270	wall-associated kinase 2 (WAK2)		149	0.41	At4g00880	auxin-responsive family protein		149	0.4	At2g30380	expressed protein
150	0.45	At2g02020	proton-dependent oligopeptide transport (POT) family protein		150	0.41	At1g49975	expressed protein		150	0.4	At3g31920	CACTA-like transposase family (Tnp2/En/Spm)
151	0.45	At3g47560	esterase/lipase/thioesterase family protein		151	0.41	At3g50750	brassinosteroid signalling positive regulator-related		151	0.4	At5g33260	pseudogene, hypothetical protein
152	0.45	At3g11950	UbiA prenyltransferase family protein		152	0.41	At3g55250	expressed protein		152	0.39	At2g31420	hypothetical protein
153	0.45	At4g30110	ATPase E1-E2 type family protein / haloacid dehalogenase-like hydrolase family protein / heavy-metal-associated domain-containing protein		153	0.41	At4g13220	expressed protein		153	0.39	At3g30250	hypothetical protein
154	0.44	At3g54900	CAX-interacting protein 1 (CAXIP1)		154	0.41	At5g49630	amino acid permease 6 (AAP6)		154	0.39	At3g44410	pseudogene, disease resistence protein, putative
155	0.44	At5g20935	expressed protein		155	0.41	At1g35420	dienelactone hydrolase family protein		155	0.39	At3g49770	hypothetical protein
156	0.44	At5g53850	haloacid dehalogenase-like hydrolase family protein		156	0.41	At2g32480	membrane-associated zinc metalloprotease, putative		156	0.39	At1g49900	zinc finger (C2H2 type) family protein
157	0.44	At1g19960	expressed protein		157	0.41	At3g23340	casein kinase, putative		157	0.39	At1g63590	receptor-like protein kinase-related
158	0.44	At2g23610	esterase, putative		158	0.41	At5g04950	nicotianamine synthase, putative		158	0.39	At2g10070	expressed protein
159	0.44	At2g24390	avirulence-responsive protein-related / avirulence induced gene (AIG) protein-related		159	0.41	At4g02260	RelA/SpoT protein, putative (RSH1)		159	0.39	At3g49150	F-box family protein
160	0.44	At2g41310	two-component responsive regulator / response reactor 3 (RR3)		160	0.41	At5g48790	expressed protein		160	0.39	At5g48200	hypothetical protein
161	0.44	At5g26880	tRNA/rRNA methyltransferase (SpoU) family protein		161	0.41	At3g48200	expressed protein		161	0.39	At5g55780	DC1 domain-containing protein
162	0.44	At1g68520	zinc finger (B-box type) family protein		162	0.41	At4g18740	expressed protein		162	0.39	At1g31520	hypothetical protein
163	0.44	At2g37860	expressed protein		163	0.41	At5g16400	thioredoxin, putative		163	0.39	At2g14760	basic helix-loop-helix protein / bHLH protein
164	0.44	At3g13410	expressed protein		164	0.4	At2g04039	expressed protein		164	0.39	At2g26960	myb family transcription factor (MYB81)
165	0.44	At3g52840	beta-galactosidase, putative / lactase, putative		165	0.4	At2g34460	flavin reductase-related		165	0.39	At2g31050	plastocyanin-like domain-containing protein
166	0.44	At3g09050	expressed protein		166	0.4	At4g16770	oxidoreductase, 2OG-Fe(II) oxygenase family protein		166	0.39	At4g02490	non-LTR retrotransposon family (LINE)
167	0.44	At2g24762	expressed protein		167	0.4	At4g27710	cytochrome P450 family protein		167	0.39	At1g33220	beta-1,3-glucanase, putative
168	0.44	At3g21260	glycolipid transfer protein-related		168	0.4	At4g38860	auxin-responsive protein, putative		168	0.39	At1g36230	hypothetical protein
169	0.44	At3g62110	glycoside hydrolase family 28 protein / polygalacturonase (pectinase) family protein		169	0.4	At5g38660	expressed protein		169	0.39	At2g03580	F-box family protein-related
170	0.44	At5g10470	kinesin motor protein-related		170	0.4	At1g03130	photosystem I reaction center subunit II, chloroplast, putative / photosystem I 20 kDa subunit, putative / PSI-D, putative (PSAD2)		170	0.39	At2g25565	hypothetical protein
171	0.44	At5g19010	mitogen-activated protein kinase, putative / MAPK, putative (MPK16)		171	0.4	At1g56500	haloacid dehalogenase-like hydrolase family protein		171	0.39	At2g44930	expressed protein
172	0.44	At3g07140	GPI transamidase component Gpi16 subunit family protein		172	0.4	At3g09050	expressed protein		172	0.39	At5g28590	DNA-binding protein-related
173	0.44	At3g11280	myb family transcription factor		173	0.4	At5g23060	expressed protein		173	0.39	At1g02620	GTP-binding protein (SAR1A)
174	0.44	At3g10520	non-symbiotic hemoglobin 2 (HB2) (GLB2)		174	0.4	At2g04032	metal transporter, putative (ZIP7)		174	0.39	At2g34990	zinc finger (C3HC4-type RING finger) family protein
175	0.44	At5g53160	expressed protein		175	0.4	At2g04080	MATE efflux family protein		175	0.39	At3g42100	AT hook motif-containing protein-related
176	0.44	At1g13110	cytochrome P450 71B7 (CYP71B7)		176	0.4	At2g23590	hydrolase, alpha/beta fold family protein		176	0.39	At3g46480	oxidoreductase, 2OG-Fe(II) oxygenase family protein
177	0.44	At1g19600	pfkB-type carbohydrate kinase family protein		177	0.4	At4g04850	K+ efflux antiporter, putative (KEA3)		177	0.39	At5g20370	serine-rich protein-related
178	0.44	At1g63940	monodehydroascorbate reductase, putative		178	0.4	At1g73110	ribulose bisphosphate carboxylase/oxygenase activase, putative / RuBisCO activase, putative		178	0.39	At1g18200	Ras-related GTP-binding family protein
179	0.44	At4g25870	expressed protein		179	0.4	At5g44580	expressed protein		179	0.39	At2g15670	hypothetical protein
180	0.44	At3g14310	pectinesterase family protein		180	0.4	At1g66970	glycerophosphoryl diester phosphodiesterase family protein		180	0.39	At3g10600	amino acid permease family protein
181	0.44	At3g43600	aldehyde oxidase, putative		181	0.4	At2g37450	nodulin MtN21 family protein		181	0.39	At3g21410	F-box family protein (FBW1)
182	0.44	At4g14760	M protein repeat-containing protein		182	0.4	At2g48070	expressed protein		182	0.39	At5g01860	zinc finger (C2H2 type) family protein
183	0.44	At5g07460	peptide methionine sulfoxide reductase, putative		183	0.4	At3g59400	expressed protein		183	0.39	At5g38080	hypothetical protein
184	0.43	At1g01050	inorganic pyrophosphatase, putative (soluble) / pyrophosphate phospho-hydrolase, putative / PPase, putative		184	0.4	At4g00780	meprin and TRAF homology domain-containing protein / MATH domain-containing protein		184	0.39	At5g59360	expressed protein
185	0.43	At1g11350	S-locus lectin protein kinase family protein		185	0.4	At4g05090	inositol monophosphatase family protein		185	0.39	At5g66370	hypothetical protein
186	0.43	At2g18290	anaphase-promoting complex, subunit 10 family / APC10 family		186	0.4	At4g17880	basic helix-loop-helix (bHLH) family protein		186	0.39	At1g28160	ethylene-responsive element-binding family protein
187	0.43	At3g56840	FAD-dependent oxidoreductase family protein		187	0.4	At4g33470	histone deacetylase family protein		187	0.39	At2g07290	hypothetical protein
188	0.43	At5g53580	aldo/keto reductase family protein		188	0.4	At5g37360	expressed protein		188	0.39	At2g20250	hypothetical protein
189	0.43	At2g44760	expressed protein		189	0.4	At1g51805	leucine-rich repeat protein kinase, putative		189	0.39	At5g56110	myb family transcription factor
190	0.43	At4g15545	expressed protein		190	0.4	At2g01870	expressed protein		190	0.39	At1g41870	hypothetical protein
191	0.43	At1g13440	glyceraldehyde 3-phosphate dehydrogenase, cytosolic, putative / NAD-dependent glyceraldehyde-3-phosphate dehydrogenase, putative		191	0.4	At2g26690	nitrate transporter (NTP2)		191	0.39	At2g06410	Mutator-like transposase family
192	0.43	At1g24100	UDP-glucoronosyl/UDP-glucosyl transferase family protein		192	0.4	At3g01550	triose phosphate/phosphate translocator, putative		192	0.39	At2g38460	iron transporter-related
193	0.43	At2g20570	golden2-like transcription factor (GLK1)		193	0.4	At3g14930	uroporphyrinogen decarboxylase, putative / UPD, putative		193	0.39	At3g26614	non-LTR retrotransposon family (LINE)
194	0.43	At2g42610	expressed protein		194	0.4	At5g47840	adenylate kinase, chloroplast, putative / ATP-AMP transphosphorylase, putative		194	0.39	At4g07790	hypothetical protein
195	0.43	At2g44210	expressed protein		195	0.4	At1g18730	expressed protein		195	0.39	At3g21170	F-box family protein
196	0.43	At1g01220	GHMP kinase-related		196	0.4	At1g52510	hydrolase, alpha/beta fold family protein		196	0.39	At3g43900	hypothetical protein
197	0.43	At4g35270	RWP-RK domain-containing protein		197	0.4	At4g39410	WRKY family transcription factor		197	0.39	At3g47170	transferase family protein
198	0.43	At3g46490	oxidoreductase, 2OG-Fe(II) oxygenase family protein		198	0.4	At5g22390	expressed protein		198	0.39	At5g53670	hypothetical protein
199	0.43	At4g11410	short-chain dehydrogenase/reductase (SDR) family protein		199	0.4	At1g33440	proton-dependent oligopeptide transport (POT) family protein		199	0.39	At2g11690	CACTA-like transposase family (Tnp1/En/Spm)
200	0.43	At5g58900	myb family transcription factor		200	0.4	At2g41940	zinc finger (C2H2 type) family protein		200	0.39	At3g31310	hypothetical protein
201	0.43	At1g49750	leucine-rich repeat family protein		201	0.4	At3g08920	rhodanese-like domain-containing protein		201	0.39	At5g28870	pseudogene, hypothetical protein
202	0.43	At3g04940	cysteine synthase, putative / O-acetylserine (thiol)-lyase, putative / O-acetylserine sulfhydrylase, putative		202	0.4	At5g05960	protease inhibitor/seed storage/lipid transfer protein (LTP) family protein		202	0.38	At2g31770	zinc finger (C3HC4-type RING finger) family protein
203	0.43	At4g10470	expressed protein		203	0.4	At5g27290	expressed protein		203	0.38	At3g57970	emsy N terminus domain-containing protein / ENT domain-containing protein
204	0.43	At5g64290	oxoglutarate/malate translocator, putative		204	0.4	At5g59250	sugar transporter family protein		204	0.38	At4g03730	CACTA-like transposase family (En/Spm)
205	0.43	At1g12110	nitrate/chlorate transporter (NRT1.1) (CHL1)		205	0.4	At1g08520	magnesium-chelatase subunit chlD, chloroplast, putative / Mg-protoporphyrin IX chelatase, putative (CHLD)		205	0.38	At4g04730	hypothetical protein
206	0.43	At2g01870	expressed protein		206	0.39	At3g50270	transferase family protein		206	0.38	At4g17700	hypothetical protein
207	0.43	At5g36930	disease resistance protein (TIR-NBS-LRR class), putative		207	0.39	At3g57040	two-component responsive regulator / response reactor 4 (RR4)		207	0.38	At4g38880	amidophosphoribosyltransferase, putative / glutamine phosphoribosylpyrophosphate amidotransferase, putative / phosphoribosyldiphosphate 5-amidotransferase, putative
208	0.43	At3g01660	expressed protein		208	0.39	At5g51110	expressed protein		208	0.38	At1g01760	adenosine-deaminase family / editase family
209	0.43	At4g03060	2-oxoglutarate-dependent dioxygenase, putative (AOP2)		209	0.39	At5g57930	expressed protein		209	0.38	At1g11470	hypothetical protein
210	0.43	At1g24040	GCN5-related N-acetyltransferase (GNAT) family protein		210	0.39	At3g08940	chlorophyll A-B binding protein (LHCB4.2)		210	0.38	At1g14430	glyoxal oxidase-related
211	0.43	At4g03150	expressed protein		211	0.39	At3g47560	esterase/lipase/thioesterase family protein		211	0.38	At1g40230	hypothetical protein
212	0.43	At3g43790	transporter-related		212	0.39	At4g12830	hydrolase, alpha/beta fold family protein		212	0.38	At2g14595	Mutator-like transposase family
213	0.43	At5g52540	expressed protein		213	0.39	At5g35790	glucose-6-phosphate 1-dehydrogenase / G6PD (APG1)		213	0.38	At3g28330	F-box family protein-related
214	0.42	At1g17470	developmentally regulated GTP-binding protein (DRG1)		214	0.39	At1g64860	RNA polymerase sigma subunit SigA (sigA) / sigma factor 1 (SIG1)		214	0.38	At3g60920	beige/BEACH domain-containing protein
215	0.42	At4g37040	metallopeptidase M24 family protein		215	0.39	At1g67700	expressed protein		215	0.38	At5g23650	myb family transcription factor
216	0.42	At5g26330	plastocyanin-like domain-containing protein / mavicyanin, putative		216	0.39	At1g75690	chaperone protein dnaJ-related		216	0.38	At5g28930	hypothetical protein
217	0.42	At2g15050	lipid transfer protein, putative		217	0.39	At2g27290	expressed protein		217	0.38	At1g19030	hypothetical protein
218	0.42	At4g30020	subtilase family protein		218	0.39	At3g13980	expressed protein		218	0.38	At1g31100	non-LTR retrotransposon family (LINE)
219	0.42	At3g04790	ribose 5-phosphate isomerase-related		219	0.39	At3g17040	tetratricopeptide repeat (TPR)-containing protein		219	0.38	At2g17590	DC1 domain-containing protein
220	0.42	At4g12880	plastocyanin-like domain-containing protein		220	0.39	At5g17600	zinc finger (C3HC4-type RING finger) family protein		220	0.38	At2g24840	MADS-box family protein
221	0.42	At1g54350	ABC transporter family protein		221	0.39	At1g74070	peptidyl-prolyl cis-trans isomerase cyclophilin-type family protein		221	0.38	At2g41930	protein kinase family protein
222	0.42	At1g75130	cytochrome P450 family protein		222	0.39	At3g20930	RNA recognition motif (RRM)-containing protein		222	0.38	At3g08490	hypothetical protein
223	0.42	At2g02950	phytochrome kinase substrate 1 (PKS1)		223	0.39	At3g21950	S-adenosyl-L-methionine:carboxyl methyltransferase family protein		223	0.38	At3g10990	F-box family protein
224	0.42	At3g26300	cytochrome P450 family protein		224	0.39	At3g22890	sulfate adenylyltransferase 1 / ATP-sulfurylase 1 (APS1)		224	0.38	At3g45690	proton-dependent oligopeptide transport (POT) family protein
225	0.42	At1g66970	glycerophosphoryl diester phosphodiesterase family protein		225	0.39	At1g06830	glutaredoxin family protein		225	0.38	At3g47310	Mutator-like transposase family
226	0.42	At3g10525	expressed protein		226	0.39	At1g31920	pentatricopeptide (PPR) repeat-containing protein		226	0.38	At4g08380	proline-rich extensin-like family protein
227	0.42	At3g60750	transketolase, putative		227	0.39	At1g51110	plastid-lipid associated protein PAP / fibrillin family protein		227	0.38	At5g35760	expressed protein
228	0.42	At5g12860	oxoglutarate/malate translocator, putative		228	0.39	At2g17260	glutamate receptor family protein (GLR3.1) (GLR2)		228	0.38	At5g55020	myb family transcription factor (MYB120)
229	0.42	At1g11860	aminomethyltransferase, putative		229	0.39	At3g63110	adenylate isopentenyltransferase 3 / cytokinin synthase (IPT3)		229	0.38	At1g56270	hypothetical protein
230	0.42	At1g77400	expressed protein		230	0.39	At1g18060	expressed protein		230	0.38	At3g08500	myb family transcription factor (MYB83)
231	0.42	At3g52720	carbonic anhydrase family protein		231	0.39	At3g02730	thioredoxin, putative		231	0.38	At3g28280	hypothetical protein
232	0.42	At5g23440	ferredoxin-thioredoxin reductase, putative		232	0.39	At3g23080	expressed protein		232	0.38	At1g12190	F-box family protein
233	0.42	At1g72300	leucine-rich repeat transmembrane protein kinase, putative		233	0.39	At3g28130	nodulin MtN21 family protein		233	0.38	At3g13280	expressed protein
234	0.42	At2g01420	auxin transport protein, putative		234	0.39	At5g04140	glutamate synthase (GLU1) / ferredoxin-dependent glutamate synthase (Fd-GOGAT 1)		234	0.38	At3g29800	AAA-type ATPase family
235	0.42	At2g30860	glutathione S-transferase, putative		235	0.39	At5g08650	GTP-binding protein LepA, putative		235	0.38	At4g25920	expressed protein
236	0.42	At2g33530	serine carboxypeptidase S10 family protein		236	0.39	At5g53370	pectinesterase family protein		236	0.38	At5g22600	expressed protein
237	0.42	At3g48200	expressed protein		237	0.39	At1g52220	expressed protein		237	0.38	At1g35617	hypothetical protein
238	0.42	At1g70410	carbonic anhydrase, putative / carbonate dehydratase, putative		238	0.39	At1g64150	expressed protein		238	0.38	At4g10820	F-box family protein
239	0.42	At2g01680	ankyrin repeat family protein		239	0.39	At1g66140	zinc finger (C2H2 type) family protein		239	0.38	At5g14830	retrotransposon family
240	0.42	At3g45210	expressed protein		240	0.39	At1g76100	plastocyanin		240	0.38	At5g34900	Ulp1 protease family protein
241	0.42	At5g45490	disease resistance protein-related		241	0.39	At2g21370	xylulose kinase, putative		241	0.38	At1g09890	expressed protein
242	0.42	At5g66490	expressed protein		242	0.39	At5g14740	carbonic anhydrase 2 / carbonate dehydratase 2 (CA2) (CA18)		242	0.38	At1g34842	non-LTR retroelement reverse transcriptase
243	0.42	At1g61180	disease resistance protein (CC-NBS-LRR class), putative		243	0.39	At1g79790	haloacid dehalogenase-like hydrolase family protein		243	0.38	At1g64830	aspartyl protease family protein
244	0.42	At1g67870	glycine-rich protein		244	0.39	At2g01110	thylakoid membrane formation protein / cpTatC (APG2)		244	0.38	At1g67240	Mutator-like transposase family
245	0.42	At2g41530	esterase, putative		245	0.39	At2g20725	CAAX amino terminal protease family protein		245	0.38	At1g78840	F-box family protein
246	0.42	At5g27950	kinesin motor protein-related		246	0.39	At2g21530	forkhead-associated domain-containing protein / FHA domain-containing protein		246	0.38	At2g18820	non-LTR retrotransposon family (LINE)
247	0.42	At1g50170	expressed protein		247	0.39	At2g35260	expressed protein		247	0.38	At5g20560	beta-1,3-glucanase, putative
248	0.42	At1g74520	ABA-responsive protein (HVA22a)		248	0.39	At3g50685	expressed protein		248	0.38	At5g28230	pseudogene, similar to glucose-6-phosphate/phosphate-translocator precursor
249	0.42	At1g78900	vacuolar ATP synthase catalytic subunit A / V-ATPase A subunit / vacuolar proton pump alpha subunit / V-ATPase 69 kDa subunit		249	0.39	At5g44400	FAD-binding domain-containing protein		249	0.38	At5g46670	CHP-rich zinc finger protein, putative
250	0.42	At2g20270	glutaredoxin family protein		250	0.39	At1g50320	thioredoxin x		250	0.38	At1g56675	copia-like retrotransposon family
251	0.42	At2g25830	YebC-related		251	0.39	At2g35410	33 kDa ribonucleoprotein, chloroplast, putative / RNA-binding protein cp33, putative		251	0.38	At2g24620	S-locus glycoprotein family protein
252	0.42	At3g49500	RNA-dependent RNA polymerase (SDE1)		252	0.39	At2g39470	photosystem II reaction center PsbP family protein		252	0.38	At2g35460	harpin-induced family protein / HIN1 family protein / harpin-responsive family protein
253	0.42	At5g14970	expressed protein		253	0.39	At3g10080	germin-like protein, putative		253	0.38	At2g40580	protein kinase family protein
254	0.41	At3g10160	dihydrofolate synthetase/folylpolyglutamate synthetase (DHFS/FPGS3)		254	0.39	At3g17650	oligopeptide transporter OPT family protein		254	0.38	At4g12140	zinc finger (C3HC4-type RING finger) family protein
255	0.41	At5g03900	expressed protein		255	0.39	At3g22104	phototropic-responsive NPH3 protein-related		255	0.38	At4g21240	F-box family protein
256	0.41	At3g02060	DEAD/DEAH box helicase, putative		256	0.39	At3g25560	protein kinase family protein		256	0.38	At4g28810	expressed protein
257	0.41	At3g07670	SET domain-containing protein		257	0.39	At3g56010	expressed protein		257	0.38	At5g05050	peptidase C1A papain family protein
258	0.41	At3g60440	expressed protein		258	0.39	At1g14150	oxygen evolving enhancer 3 (PsbQ) family protein		258	0.38	At1g43930	Mutator-like transposase family
259	0.41	At3g61540	peptidase family protein		259	0.39	At1g19150	chlorophyll A-B binding protein, putative / LHCI type II, putative		259	0.38	At2g19140	copia-like retrotransposon family
260	0.41	At5g02710	expressed protein		260	0.39	At1g51100	expressed protein		260	0.38	At2g30680	expressed protein
261	0.41	At1g28610	GDSL-motif lipase, putative		261	0.39	At1g55370	expressed protein		261	0.38	At3g14030	hypothetical protein
262	0.41	At3g01860	expressed protein		262	0.39	At2g21960	expressed protein		262	0.38	At3g56700	male sterility protein, putative
263	0.41	At1g56190	phosphoglycerate kinase, putative		263	0.38	At2g32880	meprin and TRAF homology domain-containing protein / MATH domain-containing protein		263	0.38	At5g08090	hypothetical protein
264	0.41	At2g01620	expressed protein		264	0.38	At2g47450	chloroplast signal recognition particle component (CAO)		264	0.38	At5g11180	glutamate receptor family protein (GLR2.6)
265	0.41	At2g31670	expressed protein		265	0.38	At3g01120	cystathionine gamma-synthase, chloroplast / O-succinylhomoserine (Thiol)-lyase (CGS)		265	0.38	At1g31030	non-LTR retrotransposon family (LINE)
266	0.41	At4g29080	auxin-responsive AUX/IAA family protein		266	0.38	At3g26900	shikimate kinase family protein		266	0.38	At2g04060	beta-galactosidase, putative / lactase, putative
267	0.41	At4g29220	phosphofructokinase family protein		267	0.38	At4g23890	expressed protein		267	0.38	At2g04920	F-box family protein (FBX9)
268	0.41	At5g01240	amino acid permease, putative		268	0.38	At1g19720	pentatricopeptide (PPR) repeat-containing protein		268	0.38	At2g05370	expressed protein
269	0.41	At5g17530	phosphoglucosamine mutase family protein		269	0.38	At1g31190	inositol monophosphatase family protein		269	0.38	At2g17610	non-LTR retrotransposon family (LINE)
270	0.41	At5g40850	urophorphyrin III methylase (UPM1)		270	0.38	At1g32070	GCN5-related N-acetyltransferase (GNAT) family protein / nuclear shuttle interacting protein (NSI)		270	0.38	At2g19700	expressed protein
271	0.41	At5g61660	glycine-rich protein		271	0.38	At1g51080	expressed protein		271	0.38	At3g32960	hypothetical protein
272	0.41	At1g50320	thioredoxin x		272	0.38	At3g54660	gluthatione reductase, chloroplast		272	0.38	At3g45950	splicing factor-related
273	0.41	At2g23390	expressed protein		273	0.38	At5g03760	glycosyl transferase family 2 protein		273	0.38	At3g52210	mRNA capping enzyme family protein
274	0.41	At2g43200	dehydration-responsive family protein		274	0.38	At3g06770	glycoside hydrolase family 28 protein / polygalacturonase (pectinase) family protein		274	0.38	At4g03760	pseudogene, hypothetical protein
275	0.41	At3g53100	GDSL-motif lipase/hydrolase family protein		275	0.38	At4g18370	protease HhoA, chloroplast (SPPA) (HHOA)		275	0.38	At5g45120	aspartyl protease family protein
276	0.41	At3g61210	embryo-abundant protein-related		276	0.38	At1g26150	protein kinase family protein		276	0.37	At1g28220	purine permease, putative
277	0.41	At5g09650	inorganic pyrophosphatase family protein		277	0.38	At4g09350	DNAJ heat shock N-terminal domain-containing protein		277	0.37	At1g30780	F-box family protein
278	0.41	At5g56040	leucine-rich repeat protein kinase, putative		278	0.38	At5g08370	alpha-galactosidase, putative / melibiase, putative / alpha-D-galactoside galactohydrolase, putative		278	0.37	At2g05600	hypothetical protein
279	0.41	At4g14040	selenium-binding protein, putative		279	0.38	At5g11420	expressed protein		279	0.37	At2g29800	kelch repeat-containing F-box family protein
280	0.41	At5g42030	expressed protein		280	0.38	At1g51400	photosystem II 5 kD protein		280	0.37	At5g58850	myb family transcription factor (MYB119)
281	0.41	At5g53880	expressed protein		281	0.38	At1g68520	zinc finger (B-box type) family protein		281	0.37	At1g28040	zinc finger (C3HC4-type RING finger) family protein
282	0.41	At1g14150	oxygen evolving enhancer 3 (PsbQ) family protein		282	0.38	At1g76450	oxygen-evolving complex-related		282	0.37	At1g51910	protein kinase family protein
283	0.41	At4g14400	ankyrin repeat family protein		283	0.38	At1g78490	cytochrome P450 family protein		283	0.37	At1g59680	F-box family protein
284	0.41	At5g04590	sulfite reductase / ferredoxin (SIR)		284	0.38	At3g25740	metallopeptidase M24 family protein		284	0.37	At1g72460	leucine-rich repeat transmembrane protein kinase, putative
285	0.41	At5g14090	hypothetical protein		285	0.38	At4g09650	ATP synthase delta chain, chloroplast, putative / H(+)-transporting two-sector ATPase, delta (OSCP) subunit, putative		285	0.37	At2g07683	copia-like retrotransposon family
286	0.41	At1g14340	RNA recognition motif (RRM)-containing protein		286	0.38	At4g35760	expressed protein		286	0.37	At2g29170	short-chain dehydrogenase/reductase (SDR) family protein / tropinone reductase, putative
287	0.41	At1g59960	aldo/keto reductase, putative		287	0.38	At5g01920	protein kinase family protein		287	0.37	At2g29600	kelch repeat-containing F-box family protein
288	0.41	At1g62630	disease resistance protein (CC-NBS-LRR class), putative		288	0.38	At4g34610	homeodomain-containing protein		288	0.37	At2g39160	hypothetical protein
289	0.41	At2g29630	thiamine biosynthesis family protein / thiC family protein		289	0.38	At1g66100	thionin, putative		289	0.37	At4g21370	S-locus protein kinase, putative
290	0.41	At3g47430	peroxisomal biogenesis factor 11 family protein / PEX11 family protein		290	0.38	At3g19720	dynamin family protein		290	0.37	At4g22450	hypothetical protein
291	0.41	At4g21760	glycosyl hydrolase family 1 protein		291	0.38	At4g24090	expressed protein		291	0.37	At5g28550	hypothetical protein
292	0.41	At4g31040	proton extrusion protein-related		292	0.38	At5g02160	expressed protein		292	0.37	At5g50470	CCAAT-box binding transcription factor Hap5a, putative
293	0.41	At4g31990	aspartate aminotransferase, chloroplast / transaminase A (ASP5) (AAT1)		293	0.38	At1g65260	PspA/IM30 family protein		293	0.37	At5g56800	hypothetical protein
294	0.41	At5g23020	2-isopropylmalate synthase 2 (IMS2)		294	0.38	At1g73870	zinc finger (B-box type) family protein		294	0.37	At1g16410	cytochrome P450, putative
295	0.41	At2g29970	heat shock protein-related		295	0.38	At3g08660	phototropic-responsive protein, putative		295	0.37	At1g70040	hypothetical protein
296	0.41	At4g37080	expressed protein		296	0.38	At3g56650	thylakoid lumenal 20 kDa protein		296	0.37	At3g25080	hypothetical protein
297	0.41	At4g38840	auxin-responsive protein, putative		297	0.38	At4g20760	short-chain dehydrogenase/reductase (SDR) family protein		297	0.37	At3g43280	hypothetical protein
298	0.41	At5g03880	expressed protein		298	0.38	At4g36540	basic helix-loop-helix (bHLH) family protein		298	0.37	At4g38340	RWP-RK domain-containing protein
299	0.41	At5g56850	expressed protein		299	0.38	At1g60270	pseudogene, glycosyl hydrolase family 1		299	0.37	At5g24480	hypothetical protein
300	0.41	At1g28440	leucine-rich repeat transmembrane protein kinase, putative		300	0.38	At1g60550	naphthoate synthase, putative / dihydroxynaphthoic acid synthetase, putative / DHNA synthetase, putative		300	0.37	At5g49670	hypothetical protein
