# Supplementary material for: A Systems Biology Approach Identifies a R2R3 MYB Gene Subfamily with Distinct and Overlapping Functions in Regulation of Aliphatic Glucosinolates
Source: PLoS One. 2007 Dec 19;2(12):e1322. doi: 10.1371/journal.pone.0001322 (PMC2147653; doi:10.1371/journal.pone.0001322)
Supplement: Table S5 — 35SMYB Foliar Stats (0.03 MB XLS) [file pone.0001322.s006.xls]

## Sheet: Table S5 - 35SMYB Foliar Stats
Table S5. ANOVAs Comparing Foliar Glucosinolates between Col-0 and 35S:MYB Lines.
The three subtables show ANOVAs for a difference between Col-0 and two independent transgenic lines for 35S:MYB28 (top table), 35S:MYB29 (middle table) and 35S:MYB76 (bottom table), respectively, for each detected glucosinolate within foliar tissue. Each line shows the ANOVA for the glucosinolate using the abbreviations listed in Supplemental Table 6. For the ANOVAs, Total model Sums-of-Squares (…
35S:MYB28			Experiment				Genotype				Line(Genotype)				Experiment*Genotype
Trait	TotalSS		SS	F	P		SS	F	P		SS	F	P		SS	F	P
3MSP	192471		8014.29	1.85	NS		179.248	0.04	NS		11275.7	1.3	NS		2207.86	0.51	NS
4MTB	32171.1		14584.8	50.57	<0.001		6261.49	21.71	<0.001		648.505	1.12	NS		2491.85	8.64	0.0055
4MSB	1.98026e+06		171573	5.75	0.0214		386223	12.94	0.0009		8237.76	0.14	NS		116325	3.9	NS
5MSP	23678.9		564.124	1.3	NS		5708.26	13.19	0.0008		403.617	0.47	NS		697.477	1.61	NS
8MTO	171.81		55.3086	35.28	<0.001		0.838229	0.53	NS		1.81457	0.58	NS		10.4889	6.69	0.0135
8MSO	43899.2		1077.2	0.98	NS		69.4511	0.06	NS		83.6849	0.04	NS		49.1936	0.04	NS
Total Aliphatic	3.5623e+06		202607	2.94	NS		386330	5.61	0.0229		56955.6	0.41	NS		131210	1.9	NS
I3M	140011		17081	6.19	0.0173		13819.9	5.01	0.0311		2831.41	0.51	NS		1336.98	0.48	NS
4MO-I3M	8276.93		2503.66	37.17	<0.001		1280.99	19.02	<0.001		60.9132	0.45	NS		308.212	4.58	0.0388
NMO-I3M	24432.5		3168.8	6.48	0.0149		34.7275	0.07	NS		837.634	0.86	NS		74.4308	0.15	NS
Total Indolic	235241		18755.3	3.48	NS		5756.84	1.07	NS		779.229	0.07	NS		3937.31	0.73	NS
35S:MYB29			Experiment				Genotype				Line(Genotype)				Experiment*Genotype
Trait	TotalSS		SS	F	P		SS	F	P		SS	F	P		SS	F	P
3MSP	18511.6		174.666	0.62	NS		3822.1	13.67	0.0006		2311.33	8.27	0.0061		17.6081	0.06	NS
4MTB	45918		24888.6	107.46	<0.001		4939.42	21.33	<0.001		7790.91	33.64	<0.001		319.341	1.38	NS
4MSB	1.47511e+06		752.403	0.04	NS		358038	18.72	<0.001		258523	13.51	0.0006		77.0648	0	NS
5MSP	4062.34		39.4173	0.77	NS		881.467	17.18	<0.001		854.086	16.65	<0.001		14.4029	0.28	NS
8MTO	364.423		36.9982	5.31	0.0259		0.0300444	0	NS		9.72373	1.39	NS		0.0387831	0.01	NS
8MSO	11328.4		3833.18	42.74	<0.001		1224.32	13.65	0.0006		2.72438	0.03	NS		16.7954	0.19	NS
Total Aliphatic	1.943e+06		21226	0.82	NS		434955	16.74	<0.001		247871	9.54	0.0034		99.8812	0	NS
I3M	43922.8		23853.6	66.77	<0.001		60.0573	0.17	NS		601.732	1.68	NS		6.38796	0.02	NS
4MO-I3M	8887.33		6261	304.92	<0.001		42.59	2.07	NS		94.088	4.58	NS		13.18	0.64	NS
NMO-I3M	76203.6		22544	21.04	<0.001		109.537	0.1	NS		753.316	0.7	NS		579.677	0.54	NS
Total Indolic	99729.8		6960.33	3.62	NS		136.637	0.07	NS		3804.02	1.98	NS		914.118	0.47	NS
35S:MYB76			Experiment				Genotype				Line(Genotype)				Experiment*Genotype
Trait	TotalSS			F	P		SS	F	P		SS	F	P		SS	F	P
3MSP	14985.1		482.987	2.28	NS		5999.2	28.38	<0.001		45.3994	0.21	NS		29.6905	0.14	NS
4MTB	34493.2		23337.3	124.07	<0.001		5903.95	31.39	<0.001		165.471	0.88	NS		194.509	1.03	NS
4MSB	1.1203e+06		31539.3	2.43	NS		512612	39.52	<0.001		10249.8	0.79	NS		20512.9	1.58	NS
5MSP	4125.02		442.452	9.69	0.0035		1146.2	25.1	<0.001		88.6506	1.94	NS		348.847	7.64	0.0088
8MTO	151.808		9.3856	2.65	NS		0.474375	0.13	NS		0.00244398	0	NS		6.36646	1.8	NS
8MSO	27032.1		3231.68	9.15	0.0044		5510.47	15.6	<0.001		618.558	1.75	NS		33.7646	0.1	NS
Total Aliphatic	1.83987e+06		1771.76	0.07	NS		702276	27.57	<0.001		3593.72	0.14	NS		36051.1	1.42	NS
I3M	63312.3		36764.5	112.46	<0.001		77.7758	0.24	NS		827.48	2.53	NS		2259.79	6.91	0.0123
4MO-I3M	12152.9		7864.56	204.08	<0.001		326.752	8.48	0.006		22.4587	0.58	NS		289.554	7.51	0.0093
NMO-I3M	58696.7		22086.8	24.86	<0.001		492.78	0.55	NS		347.309	0.39	NS		280.905	0.32	NS
Total Indolic	97420.9		17372.9	11.13	0.0019		22.0591	0.01	NS		2718.71	1.74	NS		6611.92	4.23	NS
