# Supplementary material for: A Systems Biology Approach Identifies a R2R3 MYB Gene Subfamily with Distinct and Overlapping Functions in Regulation of Aliphatic Glucosinolates
Source: PLoS One. 2007 Dec 19;2(12):e1322. doi: 10.1371/journal.pone.0001322 (PMC2147653; doi:10.1371/journal.pone.0001322)
Supplement: Table S6 — Abbreviations (0.09 MB XLS) [file pone.0001322.s007.xls]

## Sheet: Table S6 -  Abbreviations
Table S6. Glucosinolate abbreviations.
The abbreviations are used for the glucosinolates throughout the paper. Glucosinolate Name is the name of the side chain for the glucosinolate in question and Glucosinolate Structure presents the chemical structure of the glucosinolate.
Abbreviation	Glucosinolate Name	Glucosinolate Structure
3MTP	3-methylthiopropyl
3MSP	3-methylsulfinylpropyl
3OHP	3-hydroxypropyl
Allyl	Allyl
3BZOP	3-benzoyloxypropyl
4MTB	4-methylthiobutyl
4MSB	4-methylsulfinylbutyl
4OHB	4-hydroxybutyl
4BZOB	4-benzoyloxybutyl
2OH-Butenyl	2-hydroxy-but-3-enyl
5MSP	5-methylsulfinylpentyl
6MTH	6-methylthiohexyl
6MSH	6-methylsulfinylhexyl
7MTH	7-methylthioheptyl
7MSH	7-methylsulfinylheptyl
8MTO	8-methylthiooctyl
8MSO	8-methylsulfinyloctyl
Total Aliphatic	Sum of all aliphatic glucosinolates
4OH-I3M	4-hydroxy-indol-3-ylmethyl
I3M	indol-3-ylmethyl
4MO-I3M	4-methoxy-indol-3-ylmethyl
NMO-I3M	N-methoxy-indol-3-ylmethyl
Total Indolic	Sum of all indolic glucosinolates
