# Supplementary material for: A Systems Biology Approach Identifies a R2R3 MYB Gene Subfamily with Distinct and Overlapping Functions in Regulation of Aliphatic Glucosinolates
Source: PLoS One. 2007 Dec 19;2(12):e1322. doi: 10.1371/journal.pone.0001322 (PMC2147653; doi:10.1371/journal.pone.0001322)
Supplement: Table S8 — Pathway Lists (0.03 MB XLS) [file pone.0001322.s009.xls]

## Sheet: Table S8 - Pathway Lists
Table S8. Sulfur Utilization Pathways for Pathway ANOVA Analysis of Microarrays.
Shown is a list of genes, denoted by their AGI code, their proposed pathway membership, abbreviated pathway name and known or predicted enzyme functions are listed. These were utilized for a targeted analysis of altered transcript level within the described microarray experiments using the described nested ANOVA approach.
Gene	Pathway	PathwayII	Enzyme	probe
AT1G16410	Aliphatic Glucosinolate	AliGSBio	CYP79F	262717_s_at
AT1G18590	Aliphatic Glucosinolate	AliGSBio	ATST5C	255773_at
AT1G24100	Aliphatic Glucosinolate	AliGSBio	UGT74B1	264873_at
AT1G65860	Aliphatic Glucosinolate	AliGSBio	FMO	261913_at
AT1G74090	Aliphatic Glucsoinolate	AliGSBio	ATST5B	260385_at
AT2G20610	Aliphatic Glucosinolate	AliGSBio	C-S LYASE	263714_at
AT2G25450	Aliphatic Glucosinolate	AliGSBio	GS-OH	265615_at
AT2G31790	Aliphatic Glucosinolate	AliGSBio	UGT	263477_at
AT3G19710	Aliphatic Glucosinolate	AliGSBio	BCAT4	257021_at
AT4G03050	Aliphatic Glucosinolate	AliGSBio	AOP3	255471_at
AT4G03060	Aliphatic Glucosinolate	AliGSBio	AOP2	255437_at
AT4G13770	Aliphatic Glucosinolate	AliGSBio	CYP83A1	254687_at
AT5G23010	Aliphatic Glucosinolate	AliGSBio	MAM1	249866_at
AT5G23020	Aliphatic Glucosinolate	AliGSBio	MAM3	249867_at
AT1G07640	Aliphatic Transcription Factors	AliGSTF	DOF1.1	261409_at
AT3G09710	Aliphatic Transcription Factors	AliGSTF	IQD1	258700_at
AT5G07690	Aliphatic Transcription Factors	AliGSTF	MYB29	250598_at
AT5G07700	Aliphatic Transcription Factors	AliGSTF	MYB76	250589_at
AT5G61420	Aliphatic Transcription Factors	AliGSTF	MYB28	247549_at
AT1G55920	cysteine biosynthesis	CysBio	serine acetyltransferase	260602_at
AT2G17640	cysteine biosynthesis	CysBio	serine O-acetyltransferase	264594_at
AT2G34970	cysteine biosynthesis	CysBio	serine O-acetyltransferase	267415_at
AT2G43750	cysteine biosynthesis	CysBio	O-acetylserine (thiol) lyase	260566_at
AT3G03630	cysteine biosynthesis	CysBio	cysteine synthase	259172_at
AT3G04940	cysteine biosynthesis	CysBio	cysteine synthase	259094_at
AT3G13110	cysteine biosynthesis	CysBio	serine acetyltransferase	257194_at
AT3G59760	cysteine biosynthesis	CysBio	O-acetylserine (thiol) lyase	251487_at
AT3G61440	cysteine biosynthesis	CysBio	cysteine synthase	251322_at
AT4G14880	cysteine biosynthesis	CysBio	O-acetylserine (thiol) lyase	245286_at
AT4G29540	cysteine biosynthesis	CysBio	serine O-acetyltransferase	253674_at
AT5G38530	cysteine biosynthesis	CysBio	cysteine synthase	249515_at
AT5G56760	cysteine biosynthesis	CysBio	serine acetyltransferase	247982_at
AT4G23100	Glutathione Synthesis	GSHBio	glutamate-cysteine ligase	254270_at
AT5G27380	Glutathione Synthesis	GSHBio	glutathione synthetase	246785_at
AT1G22410	homocysteine and cysteine interconversion	HomoCys	3-deoxy-7-phosphoheptulonate synthase	261933_at
AT1G33320	homocysteine and cysteine interconversion	HomoCys	cystathionine gamma-synthase	256531_at
AT1G55880	homocysteine and cysteine interconversion	HomoCys	cystathionine beta-synthase||cysteine synthase||threonine synthase	260594_at
AT1G64660	homocysteine and cysteine interconversion	HomoCys	cystathionine beta-lyase||methionine gamma-lyase	261957_at
AT3G01120	homocysteine and cysteine interconversion	HomoCys	cystathionine gamma-synthase||cystathionine gamma-synthase||cystathionine gamma-synthase	259279_at
AT3G10050	homocysteine and cysteine interconversion	HomoCys	1-aminocyclopropane-1-carboxylate deaminase||cystathionine beta-synthase||cysteine synthase||threonine synthase||tryptophan synthase	258884_at
AT3G22460	homocysteine and cysteine interconversion	HomoCys	cystathionine beta-synthase	256930_at
AT3G57050	homocysteine and cysteine interconversion	HomoCys	cystathionine beta-lyase	251666_at
AT4G23600	homocysteine and cysteine interconversion	HomoCys	cystathionine beta-lyase	254232_at
AT5G28020	homocysteine and cysteine interconversion	HomoCys	cysteine synthase||cysteine synthase||cystathionine beta-synthase	246701_at
AT5G28030	homocysteine and cysteine interconversion	HomoCys	cysteine synthase||cysteine synthase||threonine synthase||cystathionine beta-synthase	246700_at
AT1G74100	Indolic Glucosinolate	IndGSBio	ATST5A	260387_at
AT2G22330	Indolic Glucosinolate	IndGSBio	CYP79B3	264052_at
AT4G31500	Indolic Glucosinolate	IndGSBio	CYP83B1	253534_at
AT4G39950	Indolic Glucosinolate	IndGSBio	CYP79B2	252827_at
AT1G18570	Indolic Transcription Factors	IndGSTF	MYB51	255753_at
AT5G46760	Indolic Transcription Factors	IndGSTF	ATR2	248864_at
AT5G60890	Indolic Transcription Factors	IndGSTF	ATR1	247600_at
AT1G08700	methionine biosynthesis	MetBio	homoserine kinase	264807_at
AT2G17265	methionine biosynthesis	MetBio	homoserine kinase	264855_at
AT3G03780	methionine biosynthesis	MetBio	methionine synthase	259343_s_at
AT3G22740	methionine biosynthesis	MetBio	homocysteine S-methyltransferase	258322_at
AT3G25900	methionine biosynthesis	MetBio	homocysteine S-methyltransferase	258075_at
AT3G63250	methionine biosynthesis	MetBio	homocysteine S-methyltransferase	251175_at
AT4G11610	methionine biosynthesis	MetBio	homoserine kinase	254876_at
AT5G20980	methionine biosynthesis	MetBio	5-methyltetrahydropteroyltriglutamate-homocysteine S-methyltransferase	246185_at
AT1G02500	methionine degradation I	MetDeg	methionine adenosyltransferase	260913_at
AT2G36880	methionine degradation I	MetDeg	methionine adenosyltransferase	263838_at
AT3G17390	methionine degradation I	MetDeg	methionine adenosyltransferase	258415_at
AT3G23810	methionine degradation I	MetDeg	adenosylhomocysteinase	257173_at
AT4G01850	methionine degradation I	MetDeg	methionine adenosyltransferase	255552_at
AT4G13940	methionine degradation I	MetDeg	adenosylhomocysteinase||hydroxymethylbilane synthase	245356_at
AT1G19920	sulfate assimilation	Sulfate	ATP sulfurylase	255785_at
AT1G62180	sulfate assimilation	Sulfate	APS reductase	264745_at
AT3G22890	sulfate assimilation	Sulfate	ATP sulfurylase	256835_at
AT4G04610	sulfate assimilation	Sulfate	APS reductase	255284_at
AT4G14680	sulfate assimilation	Sulfate	ATP sulfurylase	245254_at
AT4G21990	sulfate assimilation	Sulfate	APS reductase	254343_at
AT5G04590	sulfate assimilation	Sulfate	sulfite reductase	250846_at
AT5G43780	sulfate assimilation	Sulfate	ATP sulfurylase	249112_at
AT1G29410	Tryptophan	TrpBio	PAI	259770_s_at
AT2G04400	Tryptophan	TrpBio	I3GPS	263807_at
AT2G29690	Tryptophan	TrpBio	ASA2	266671_at
AT3G54640	Tryptophan	TrpBio	TSA2	251847_at
AT4G02610	Tryptophan	TrpBio	TSA	255487_at
AT4G27070	Tryptophan	TrpBio	TSB	253898_s_at
AT5G05730	Tryptophan	TrpBio	ASA1	250738_at
AT5G17990	Tryptophan	TrpBio	PAT	250014_at
AT5G48220	Tryptophan	TrpBio	I3GPS	248688_at
