# Supplementary material for: A Systems Biology Approach Identifies a R2R3 MYB Gene Subfamily with Distinct and Overlapping Functions in Regulation of Aliphatic Glucosinolates
Source: PLoS One. 2007 Dec 19;2(12):e1322. doi: 10.1371/journal.pone.0001322 (PMC2147653; doi:10.1371/journal.pone.0001322)
Supplement: Table S9 — Pathway Results (0.02 MB XLS) [file pone.0001322.s010.xls]

## Sheet: Table S9 - Pathway Results
Table S9. Comparison of Transcript Levels for Sulfur Utilization Pathways in 35S:MYB Lines.
The three subtables show the statistical support for differential transcript levels between Col-0 and two independent transgenic lines for 35S:MYB28 (top), 35S:MYB29 (middle) and 35S:MYB76 (bottom) for each detected sulfur utilization pathway. The Mean Pathway Expression in log2 and standard error (SE) is provided for Col-0 and the 35S:MYB line. The percent effect of MYB over-expression on pathwa…
35S:MYB28						Mean Pathway Expression
Pathway	DF	SS	F	P		Col-0	SE	MYB28	SE		MYB Effect
AliGSBio	1	20.1734	237.02	<0.001		7.45747	0.16621	8.062	0.157672		0.520487
AliGSTF	1	0.4017	4.72	0.0301		5.45861	0.301778	5.64157	0.318134		0.135212
CysBio	1	0.011058	0.13	NS		6.958	0.209683	6.97683	0.197588
GSHBio	1	0.0198	0.23	NS		8.78317	0.159257	8.84739	0.207816
HomoCys	1	0.583735	6.86	0.009		6.23816	0.296423	6.38686	0.234031		0.108569
MetBio	1	0.051008	0.6	NS		5.64457	0.30218	5.69611	0.262303
MetDeg	1	1.3335	15.67	<0.001		9.84105	0.153845	9.53674	0.187574		-0.19017
Sulfate	1	0.388299	4.56	0.033		8.10745	0.0977989	8.24966	0.190092		0.103595
IndGSBio	1	0.027953	0.33	NS		9.07706	0.348745	9.033	0.308291
IndGSTF	1	0.092112	1.08	NS		4.96024	0.228099	5.07335	0.268896
TrpBio	1	0.005851	0.07	NS		6.91453	0.144756	6.89807	0.176308
35S:MYB29						Mean Pathway Expression
Pathway	DF	SS	F	P		Col-0	SE	MYB29	SE		MYB Effect
AliGSBio	1	17.5508	123.83	<0.001		7.45747	0.16621	8.02134	0.234568		0.478229
AliGSTF	1	1.23445	8.71	0.0033		5.45861	0.301778	5.77934	0.419477		0.248967
CysBio	1	0.012668	0.09	NS		6.958	0.209683	6.97815	0.273842
GSHBio	1	0.017787	0.13	NS		8.78317	0.159257	8.84404	0.141146
HomoCys	1	0.258561	1.82	NS		6.23816	0.296423	6.33713	0.35625
MetBio	1	0.65449	4.62	0.032		5.64457	0.30218	5.8292	0.377361		0.136525
MetDeg	1	1.19654	8.44	0.0038		9.84105	0.153845	9.55279	0.172792		-0.18111
Sulfate	1	0.700958	4.95	0.0265		8.10745	0.0977989	8.29852	0.199869		0.141611
IndGSBio	1	0.121148	0.85	NS		9.07706	0.348745	8.98534	0.481086
IndGSTF	1	0.258826	1.83	NS		4.96024	0.228099	5.14984	0.212421
TrpBio	1	0.013176	0.09	NS		6.91453	0.144756	6.93922	0.188988
35S:MYB76						Mean Pathway Expression
Pathway	DF	SS	F	P		Col-0	SE	MYB76	SE		MYB Effect
AliGSBio	1	4.96026	98.87	<0.001		7.45747	0.16621	7.75723	0.211676		0.230945
AliGSTF	1	3.3283	66.34	<0.001		5.45861	0.301778	5.98525	0.322555		0.440578
CysBio	1	0.000548	0.01	NS		6.958	0.209683	6.96219	0.267294
GSHBio	1	0.012016	0.24	NS		8.78317	0.159257	8.73313	0.131069
HomoCys	1	0.184105	3.67	NS		6.23816	0.296423	6.32167	0.346557
MetBio	1	2.079e-06	0	NS		5.64457	0.30218	5.64424	0.373676
MetDeg	1	1.99526	39.77	<0.001		9.84105	0.153845	9.46881	0.160068		-0.227416
Sulfate	1	1.03846	20.7	<0.001		8.10745	0.0977989	7.87489	0.159951		-0.148879
IndGSBio	1	0.28514	5.68	0.0174		9.07706	0.348745	8.93634	0.453484		-0.092932
IndGSTF	1	0.437665	8.72	0.0032		4.96024	0.228099	5.20679	0.240179		0.186367
TrpBio	1	0.024675	0.49	NS		6.91453	0.144756	6.88073	0.190112
