# Supplementary material for: A Systems Biology Approach Identifies a R2R3 MYB Gene Subfamily with Distinct and Overlapping Functions in Regulation of Aliphatic Glucosinolates
Source: PLoS One. 2007 Dec 19;2(12):e1322. doi: 10.1371/journal.pone.0001322 (PMC2147653; doi:10.1371/journal.pone.0001322)
Supplement: Table S10 — Aliphatic GLS Array (0.03 MB XLS) [file pone.0001322.s011.xls]

## Sheet: Table S10 - Aliphatic GLS Array
Table S10. Microarray Analysis of Glucosinolate Gene Expression in 35S:MYB Lines.
Shown is the significance of the effect of over-expression of MYB28, MYB29 or MYB76 upon genes characterized (top table) or predicted (bottom table) to be involved in aliphatic glucosinolate biosynthesis. For each gene, the mean log2 transcript levels and P value for a difference between the 35S:MYB line and Col-0 control was determined within the a priori defined network using the nested ANOVA m…
Genes Characterized to be Involved in Glucosinolate Biosynthesis and Regulation
		P values for Transgene Effect				Average Log2 Gene Expression Values					Percent Expression difference Myb v Col
Gene	Gene Name	MYB28	MYB29	MYB76		Col-0	MYB28	MYB29	MYB76		MYB28	MYB29	MYB76
AT3G19710	BCAT4	0.0005	0.0012	NS		9.0093	9.67069	9.79797	9.21723		0.581614	0.727488
AT5G23010	MAM1	1e-05	1e-05	0.0026		10.1984	11.5644	11.225	10.6356		1.57758	1.0373	0.354015
AT5G23020	MAM3	1e-05	0.0166	NS		5.59634	4.10195	5.01281	5.41415		-0.645068	-0.332669
AT1G16410	CYP79F1	1e-05	1e-05	NS		5.90449	6.87441	6.89314	5.83168		0.958729	0.984319
AT4G13770	CYP83A1	1e-05	0.0037	NS		10.1902	11.1647	10.8985	10.4548		0.965024	0.633931
AT2G20610	C-S LYASE	1e-05	0.009	1e-05		8.55293	9.39147	9.18896	9.29277		0.788228	0.554045	0.669985
AT1G24100	UGT74B1	0.0226	NS	NS		7.99374	8.42394	8.22703	7.83171		0.347428
AT1G18590	ATST5C	NS	NS	NS		7.05203	6.95614	7.46322	6.92985
AT1G74090	ATST5B	1e-05	0.008	1e-05		9.12484	9.98994	9.77106	9.70103		0.821465	0.56507	0.490912
AT1G65860	FMO	0.0002	0.0009	NS		6.80166	7.50887	7.61263	7.05329		0.632644	0.754393
AT4G03050	AOP3	NS	NS	NS		3.9117	3.82309	3.84929	3.89462
AT4G03060	AOP2	1e-05	0.0011	0.0152		6.84598	7.60671	7.64353	7.19774		0.694347	0.738138	0.276112
AT1G07640	DOF1.1	NS	NS	NS		6.51871	6.42622	6.3308	6.27904
AT3G09710	IQD1	NS	NS	NS		3.61568	3.6086	3.38566	3.49106
AT5G07690	MYB29	0.0062	1e-05	0.0038		5.47109	5.98762	7.17051	5.89107		0.43051	2.24769	0.337913
AT5G07700	MYB76	NS	NS	1e-05		3.81516	3.85644	4.04855	6.56024				5.70424
AT5G61420	MYB28	0.0156	NS	NS		7.87239	8.32896	7.96119	7.70485		0.372274
AT5G17690	TFL2	NS	NS	NS		4.72902	4.73198	4.93059	4.70872
Genes Predicted to be Involved in Aliphatic Glucosinolate Biosynthesis
		P values for Transgene Effect				Average Log2 Gene Expression Values					Percent Expression difference Myb v Col
Gene	Gene Name	MYB28	MYB29	MYB76		Col-0	MYB28	MYB29	MYB76		MYB28	MYB29	MYB76
AT2G43100	Aconitase	NS	NS	NS		8.06178	8.26507	8.44714	8.01318
AT3G58990	Aconitase	1e-05	0.0006	1e-05		7.89269	8.91027	8.72523	8.68178		1.02451	0.780812	0.727981
AT4G13430	Aconitase	0.0472	NS	NS		10.0897	10.464	10.5083	10.2375		0.296236
AT1G31180	IPM DH	1e-05	0.0052	1e-05		8.14601	8.99609	8.8274	8.71934		0.802596	0.60368	0.487951
AT3G03190	ATGSTF11	1e-05	1e-05	0.0013		5.62159	7.07341	6.64492	6.08871		1.73555	1.03262	0.38235
AT2G31790	UGT74C1	0.001	NS	NS		7.51209	8.13284	7.94077	7.68654		0.537682
AT2G25450	GS-OH	1e-05	0.0328	0.0436		10.202	11.0054	10.7217	10.4942		0.745287	0.433655	0.224536
