# Supplementary material for: A Systems Biology Approach Identifies a R2R3 MYB Gene Subfamily with Distinct and Overlapping Functions in Regulation of Aliphatic Glucosinolates
Source: PLoS One. 2007 Dec 19;2(12):e1322. doi: 10.1371/journal.pone.0001322 (PMC2147653; doi:10.1371/journal.pone.0001322)
Supplement: Table S11 — Microarray data on 35S:MYB overexpressors (8.79 MB XLS) [file pone.0001322.s012.xls]

## Sheet: Table S11 - All Gene Array
Table S11. Individual Gene Microarray Analysis comparing Col-0 versus 35S:MYB Lines.
Each line shows the individual gene ANOVAs comparing transcript levels within Col-0 versus each 35S:MYB ove-rexpression line for all probe sets on the ATH1 Affymetrix microarray. The nominal P values for the effect of the presence or absence of the 35S:MYB transgene (Genotype) and for the difference between the two independent transgenic lines (Transgene) are presented. Additionally, each nominal…
		Nominal P Values as Obtained from ANOVA
		MYB28 v Col-0		MYB29 v Col-0		MYB76 v Col-0			P Values Significant at FDR 0.05				Mean Transcript Accumulation (log2)
Probe	AGI	Genotype	Transgene	Genotype	Transgene	Genotype	Transgene		MYB28 v Col-0	MYB29 v Col-0	MYB76 v Col-0		Col-0	MYB28	MYB29	MYB76		Annotation
261585_at	At1g01010	0.545468	0.399273	0.89716	0.834529	0.281483	0.491789		NS	NS	NS		3.59037	3.54835	3.5796	3.50423		NAC domain protein, putative similar to NAC domain protein NAM GB: AAD17313 GI:4325282 from [Arabidopsis thaliana]; supported by cDNA: gi_16612276_gb_AF439834.1_AF439834
261568_at	At1g01030	0.0189654	0.0340409	0.606836	0.392627	0.910854	0.054646		NS	NS	NS		3.40577	3.57181	3.43059	3.41179		DNA-binding protein, putative similar to RAV1 GB:BAA34250 GI:3868857 from [Arabidopsis thaliana] (Nucleic Acids Res. 27 (2), 470-478 (1999))
261584_at	At1g01040	0.775956	0.23623	0.944354	0.0665595	0.175977	0.548773		NS	NS	NS		5.02493	4.98919	5.0162	4.80195		CAF protein identical to RNA helicase/RNAseIII CAF protein GB:AAF03534 GI:6102610 from [Arabidopsis thaliana]; supported by cDNA: gi_11559644_gb_AF292940.1_AF292940
261579_at	At1g01050	0.0300909	0.273191	0.530567	0.508658	0.246943	0.864602		NS	NS	NS		8.64903	8.52447	8.59711	8.58972		soluble inorganic pyrophosphatase, putative similar to soluble inorganic pyrophosphatase GB: AAD46520 GI:5669924 from [Populus tremula x Populus tremuloides];supported by full-length cDNA: Ceres:124537.
261569_at	At1g01060	0.0172681	0.0315521	0.312904	0.0886201	0.80806	0.834957		NS	NS	NS		4.17488	4.48523	4.25555	4.21953		DNA-binding protein, putative similar to DNA binding protein CCA1 from [Arabidopsis thaliana]
261576_at	At1g01070	0.000126006	0.317538	0.00419002	0.18499	0.000390313	0.346898		0.000126006	NS	0.000390313		3.31425	3.99032	3.70849	3.67658		unknown protein ;supported by full-length cDNA: Ceres:20749.
261577_at	At1g01080	0.00249889	0.114537	0.0600545	0.445289	0.0222834	0.296063		NS	NS	NS		7.458	7.13079	7.22542	7.12556		ribonucleoprotein, putative similar to 33 KDA RIBONUCLEOPROTEIN GB:P19684 from [Nicotiana sylvestris];supported by full-length cDNA: Ceres:21739.
261583_at	At1g01090	0.13523	0.994272	0.194824	0.998183	0.217404	0.615446		NS	NS	NS		9.3827	9.46569	9.45131	9.45856		pyruvate dehydrogenase E1 alpha subunit identical to pyruvate dehydrogenase E1 alpha subunit GB:AAB86803 GI:2454182 from [Arabidopsis thaliana]; supported by cDNA: gi_15450706_gb_AY052721.1_
261578_at	At1g01100	0.009173	0.743267	0.0227668	0.612446	0.00707231	0.187335		NS	NS	NS		9.88944	9.67367	9.68054	9.66351		acidic ribosomal protein, putative similar to 60S ACIDIC RIBOSOMAL PROTEIN P1 GB:O23095 from [Arabidopsis thaliana];supported by full-length cDNA: Ceres:24367.
261580_at	At1g01110	0.83433	0.492871	0.117143	0.127576	0.485711	0.172121		NS	NS	NS		3.65481	3.6718	3.80262	3.58628		unknown protein ;supported by full-length cDNA: Ceres:148018.
261570_at	At1g01120	0.00779162	0.766867	0.000131744	0.108723	0.00028187	0.88698		NS	0.000131744	0.00028187		9.63943	9.2278	9.14658	8.83831		fatty acid elongase 3-ketoacyl-CoA synthase 1 identical to GB:AAC99312 GI:4091810 from [Arabidopsis thaliana]
261575_at	At1g01130	0.913465	0.250384	0.951116	0.862778	0.597854	0.861044		NS	NS	NS		3.95807	3.97458	3.96656	4.03254		hypothetical protein contains similarity to serine threonine kinase GB:CAA73067 GI:2632252 from (Sorghum bicolor)
261581_at	At1g01140	0.20362	0.786497	0.620925	0.578402	0.429746	0.814092		NS	NS	NS		7.82056	7.59748	7.73634	7.67662		serine/threonine kinase, putative similar to serine/threonine kinase GB:CAA73067.1 GI:2632252 from [Sorghum bicolor]; supported by cDNA: gi_14423523_gb_AF386999.1_AF386999
261571_at	At1g01150	0.634713	0.685021	0.397937	0.514653	0.661515	0.984917		NS	NS	NS		2.75241	2.72862	2.79719	2.77799		hypothetical protein predicted by genemark.hmm, contains Pfam profile:PF00249 Myb-like DNA-binding domain
261582_at	At1g01160	0.90886	0.739478	0.774392	0.709595	0.867719	0.999447		NS	NS	NS		6.04424	6.06406	5.99956	6.0707		unknown protein ; supported by cDNA: gi_15294231_gb_AF410307.1_AF410307
261572_at	At1g01170	0.00322264	0.282592	0.0313598	0.823216	0.000126655	0.300508		NS	NS	0.000126655		8.79392	9.13396	9.00929	9.07588		unknown protein
261573_at	At1g01180	0.225472	0.12584	0.595296	0.517218	0.884293	0.994721		NS	NS	NS		3.30722	3.42939	3.36004	3.32646		hypothetical protein identical to hyothetical protein GB:AAF26464 GI:6715637 from (Arabidopsis thaliana)
261574_at	At1g01190	0.0117743	0.0851169	0.817194	0.526225	0.00394401	0.00689935		NS	NS	NS		4.19477	4.75823	4.18137	4.53009		cytochrome P450, putative similar to cytochrome P450 GB:L23209 GI:349717 from (Zea mays)
261042_at	At1g01200	0.765065	0.398735	0.34474	0.989163	0.314428	0.378156		NS	NS	NS		3.63008	3.60885	3.552	3.69757		GTP-binding protein, putative similar to GTP-binding protein GB:D12541 GI:303735 from [Pisum sativum]
261043_at	At1g01220	0.691378	0.227807	0.374891	0.68242	0.405329	0.564924		NS	NS	NS		6.05226	6.13171	6.2185	6.21877		hypothetical protein similar to unknown protein GB:AAF32477 GI:6957733 from [Arabidopsis thaliana]
261025_at	At1g01225	0.52978	0.184073	0.194038	0.366767	0.343513	0.641285		NS	NS	NS		3.70015	3.62593	3.59525	3.58307		Expressed protein ; supported by full-length cDNA: Ceres: 31323.
261057_at	At1g01230	0.131954	0.529515	0.0621093	0.719106	0.118138	0.753397		NS	NS	NS		7.27942	7.50204	7.51678	7.5106		hypothetical protein predicted by genemark.hmm; supported by full-length cDNA: Ceres: 13874.
261026_at	At1g01240	0.000861654	0.643082	7.23662e-06	0.209817	1.68065e-05	0.10124		0.000861654	7.23662e-06	1.68065e-05		6.45194	7.30659	7.16141	7.32858		hypothetical protein predicted by genemark.hmm;supported by full-length cDNA: Ceres:34178.
261059_at	At1g01250	0.0129321	0.340461	0.064479	0.543086	0.00123768	0.0270589		NS	NS	0.00123768		4.55327	4.88647	4.89291	5.25415		transcription factor TINY, putative similar to transcription factor TINY GB:CAA64359 GI:1246403 from [Arabidopsis thaliana];supported by full-length cDNA: Ceres:25524.
261050_at	At1g01260	0.925271	0.386006	0.189715	0.67973	0.332602	0.84427		NS	NS	NS		4.71169	4.71652	4.53827	4.6418		transcription factor MYC7E, putative similar to transcription factor MYC7E GB:AAD15818 GI:4321762 from [Zea mays]
261051_at	At1g01280	0.932143	0.376369	0.760061	0.428986	0.763266	0.0034685		NS	NS	NS		3.19739	3.20077	3.17943	3.20564		cytochrome P450, putative similar to cytochrome P450 GB:BAA92894 GI:7339658 from [ Petunia hybrida]
261044_at	At1g01290	0.863633	0.991381	0.726406	0.802871	0.785864	0.48852		NS	NS	NS		4.54354	4.57135	4.60159	4.50246		molybdopterin biosynthesis CNX3 protein, putative similar to molybdopterin biosynthesis CNX3 protein GB:Q39056 from [Arabidopsis thaliana]
261055_at	At1g01300	0.167957	0.716762	0.223125	0.659066	0.0831381	0.913311		NS	NS	NS		7.09715	6.74559	6.80199	6.63284		chloroplast nucleoid DNA binding protein, putative similar to chloroplast nucleoid DNA binding protein GB:BAA22813 GI:2541876 from [Nicotiana tabacum];supported by full-length cDNA: Ceres:7567.
261045_at	At1g01310	0.707391	0.526699	0.582204	0.918198	0.659104	0.0700209		NS	NS	NS		3.2143	3.17465	3.16004	3.26822		pathogenesis related protein, putative similar to pathogenesis related protein-1 GB:AAC25629 GI:3290004 from [Zea mays]
261053_at	At1g01320	0.203379	0.474626	0.354852	0.7282	0.502595	0.708763		NS	NS	NS		8.85711	8.68213	8.71261	8.7502		hypothetical protein predicted by genemark.hmm
261054_at	At1g01330	0.0501136	0.274379	0.430209	0.235171	0.368222	0.812844		NS	NS	NS		6.1036	5.83511	5.94656	5.98991		hypothetical protein predicted by genemark.hmm
261027_at	At1g01340	0.340451	0.111623	0.732608	0.285514	0.855188	0.931047		NS	NS	NS		3.8781	3.75752	3.92458	3.85072		cyclic nucleotide and calmodulin-regulated ion channel, putative similar to cyclic nucleotide and calmodulin-regulated ion channel GB:CAB40128 GI:4581201 from [Arabidopsis thaliana]; supported by cDNA: gi_8515882_gb_AF272002.1_AF272002
261056_at	At1g01360	0.812185	0.583371	0.983424	0.962025	0.174316	0.387146		NS	NS	NS		5.81543	5.85258	5.81876	6.04749		hypothetical protein similar to hypothetical protein GB:CAB45785 GI:5262156 from [Arabidopsis thaliana];supported by full-length cDNA: Ceres:3998.
261058_at	At1g01370	0.425148	0.0909176	0.269543	0.0816716	0.343778	0.0158564		NS	NS	NS		3.5838	3.64445	3.66578	3.65366		histone, putative similar to histone H3 GB:X17141 GI:10795 from [Tetrahymena pyriformis];supported by full-length cDNA: Ceres:24379.
257490_x_at	At1g01380	0.649137	0.121532	0.22133	0.584279	0.00533398	0.325547		NS	NS	NS		3.489	3.44222	3.38113	3.26453		Myb homolog (CPC), putative similar to Myb homolog (CPC)GB:BAA21917 GI:2346966 from [Arabidopsis thaliana]
261046_at	At1g01390	0.852012	0.494557	0.833697	0.047493	0.203199	0.680126		NS	NS	NS		3.98765	4.01568	4.01587	4.1832		flavonol 3-o-glucosyltransferase, putative similar to flavonol 3-o-glucosyltransferase GB:Q40287 from [Manihot esculenta]
261047_at	At1g01410	0.395298	0.530504	0.0724347	0.243368	0.634063	0.573815		NS	NS	NS		3.14908	3.24263	3.29244	3.12333		hypothetical protein predicted by genemark.hmm
261048_at	At1g01420	0.405823	0.552422	0.714399	0.642085	0.0226541	0.602297		NS	NS	NS		3.99782	3.92931	4.03969	4.24799		flavonol 3-o-glucosyltransferase, putative similar to flavonol 3-o-glucosyltransferase GB:Q40287 from [Manihot esculenta]
261049_at	At1g01430	0.00474839	0.211605	0.063705	0.973223	0.569671	0.938067		NS	NS	NS		8.16573	8.36407	8.2585	8.13327		hypothetical protein similar to hypothetical protein GB:CAB80917 GI:7267605 from [Arabidopsis thaliana]
261052_at	At1g01440	0.86492	0.305836	0.014643	0.547409	0.0147135	0.975724		NS	NS	NS		4.52969	4.50955	4.81516	4.31662		hypothetical protein similar to hypothetical protein GB:CAB80918 GI:7267606 from [Arabidopsis thaliana]
259435_at	At1g01450	0.260851	0.0209923	0.769573	0.14898	0.543687	0.122114		NS	NS	NS		3.04113	3.10986	3.06428	3.09426		hypothetical protein similar to putative phytochrome GI:10645405 from [Arabidopsis thaliana]
259425_at	At1g01460	0.960315	0.429126	0.68927	0.47106	0.996712	0.0822143		NS	NS	NS		3.07929	3.07531	3.11031	3.07949		4,5 PIP kinase, putative similar to 4,5 PIP kinase GI:2505883 from [Arabidopsis thaliana]
259426_at	At1g01470	0.558905	0.622861	0.736888	0.640611	0.0975751	0.715204		NS	NS	NS		10.3907	10.5288	10.4664	10.8254		hypothetical protein contains similarity to 1-phosphatidylinositol-4-phosphate 5-kinase(AtPIP5K1) GI:3702691 from [Arabidopsis thaliana]
259439_at	At1g01480	0.646406	0.722712	0.60685	0.987578	0.88394	0.774739		NS	NS	NS		3.64051	3.589	3.58379	3.66108		1-aminocyclopropane-1-carboxylate synthase (ACC synthase) almost identical to 1-aminocyclopropane-1-carboxylate synthase GI:166578 from [Arabidopsis thaliana]; supported by cDNA: gi_166579_gb_M95595.1_ATHACSC
259434_at	At1g01490	0.000136025	0.608437	0.011253	0.454875	0.0648813	0.576012		0.000136025	NS	NS		7.79263	8.28133	8.18287	7.99729		unknown protein
259436_at	At1g01500	0.129248	0.322164	0.0195558	0.689815	0.150383	0.307157		NS	NS	NS		6.21182	6.37864	6.4292	6.37445		hypothetical protein predicted by genemark.hmm;supported by full-length cDNA: Ceres:6115.
259438_at	At1g01510	0.902732	0.0500431	0.796113	0.399548	0.609463	0.517785		NS	NS	NS		5.6595	5.67732	5.69544	5.59058		unknown protein similar to putative dehydrogenase GI:1922246 from [Arabidopsis thaliana]; supported by cDNA: gi_15408534_dbj_AB032060.1_AB032060
259432_at	At1g01520	0.608578	0.4774	0.643059	0.334113	0.741977	0.613059		NS	NS	NS		2.78373	2.81682	2.81531	2.76243		myb-related protein, putative similar to myb-related protein GI:2505876 from [Arabidopsis thaliana]
259427_at	At1g01530	0.0745116	0.224106	0.0115572	0.409547	0.0125731	0.137253		NS	NS	NS		2.89564	3.07334	3.08219	3.05434		MADS-box transcription factor, putative similar to MADS-box transcription factor GI:6580943 from [Picea abies]
259437_at	At1g01540	0.0304422	0.247596	0.37423	0.323211	0.000154766	0.219		NS	NS	0.000154766		7.59747	7.39055	7.51611	7.06013		protein serine/threonine kinase, putative similar to protein serine/threonine kinase GI:7248457 from [Lophopyrum elongatum]; supported by cDNA: gi_14194118_gb_AF367265.1_AF367265
259440_at	At1g01550	0.0956567	0.937474	0.247484	0.935676	0.48875	0.186652		NS	NS	NS		9.10807	8.94256	9.00239	9.03118		hypothetical protein predicted by genemark.hmm; supported by cDNA: gi_16648870_gb_AY059805.1_
259428_at	At1g01560	0.147808	0.368982	0.592991	0.201618	0.533533	0.918394		NS	NS	NS		4.45333	3.98464	4.60725	4.26242		MAP kinase, putative similar to MAP kinase 5 GI:4239889 from [Zea mays]
259433_at	At1g01570	0.944911	0.923005	0.381211	0.658859	0.459111	0.641404		NS	NS	NS		3.23409	3.23926	3.31953	3.31216		hypothetical protein predicted by genscan+
259429_at	At1g01600	0.581104	0.795727	0.0620065	0.903612	0.215277	0.501932		NS	NS	NS		3.62136	3.70801	3.83454	3.75005		cytochrome P450, putative similar to cytochrome P450 GI:10442763 from [Triticum aestivum]
259430_at	At1g01610	0.00358367	0.696234	0.00151322	0.358065	0.0231728	0.869237		NS	NS	NS		7.38461	7.00985	7.01508	6.98393		hypothetical protein similar to unknown protein GI:3335359 from [Arabidopsis thaliana]
259431_at	At1g01620	0.154265	0.909957	0.211919	0.921076	0.0154605	0.523482		NS	NS	NS		10.2331	9.99213	10.0166	9.74796		plasma membrane intrinsic protein 1c, putative similar to plasma membrane intrinsic protein 1c GI:472875 from [Arabidopsis thaliana]
261563_at	At1g01630	0.0126569	0.34096	0.0873571	0.876376	0.0178427	0.724147		NS	NS	NS		8.04972	7.80362	7.81582	7.77473		polyphosphoinositide binding protein, putative similar to polyphosphoinositide binding protein Ssh2p GB:AAB94599 GI:2739046 from [Glycine max];supported by full-length cDNA: Ceres:20163.
261586_at	At1g01640	0.258122	0.501397	0.640934	0.5577	0.954733	0.289218		NS	NS	NS		3.92258	4.08174	3.96837	3.92791		hypothetical protein predicted by genemark.hmm, contains Pfam profile:PF00651 BTB/POZ domain
257484_at	At1g01650	0.15086	0.361481	0.988233	0.369031	0.136743	0.863159		NS	NS	NS		6.4615	6.34561	6.46053	6.61291		unknown protein
261587_at	At1g01660	0.420754	0.844084	0.631085	0.253474	0.348187	0.169005		NS	NS	NS		3.58814	3.53139	3.53878	3.52417		hypothetical protein predicted by genemark.hmm
261588_at	At1g01670	0.809033	0.504637	0.599216	0.63705	0.946105	0.939328		NS	NS	NS		4.01507	3.97578	3.92989	4.0056		hypothetical protein predicted by genemark.hmm
261589_at	At1g01690	0.8358	0.791462	0.162743	0.527902	0.562569	0.42957		NS	NS	NS		3.70942	3.67931	3.54089	3.63415		hypothetical protein predicted by genscan+
261590_at	At1g01700	0.118618	0.133001	0.447534	0.797369	0.148614	0.0312049		NS	NS	NS		2.94138	3.09775	3.00102	3.0476		hypothetical protein predicted by genemark.hmm
261560_at	At1g01710	0.00107806	0.454895	0.00505985	0.358631	0.0626513	0.802769		0.00107806	NS	NS		6.19028	6.67912	6.55463	6.4279		acyl CoA thioesterase, putative similar to HIV-Nef associated acyl CoA thioesterase GB:AAB71665 GI:2318125 from [Homo sapiens]
261564_at	At1g01720	0.562466	0.869611	0.461441	0.791237	0.698859	0.779815		NS	NS	NS		4.91381	4.82985	4.79607	4.94712		NAC domain protein, putative similar to NAC domain protein NAM GB:AAD17313 GI:4325282 from [Arabidopsis thaliana];supported by full-length cDNA: Ceres:20909.
261535_at	At1g01725	0.103012	0.723424	0.105707	0.904822	0.220011	0.93627		NS	NS	NS		4.28695	4.51106	4.49484	4.48898		Expressed protein ; supported by full-length cDNA: Ceres: 5811.
261561_at	At1g01730	0.0236557	0.745546	0.0601782	0.461779	0.108197	0.786728		NS	NS	NS		5.79726	6.10305	6.09521	6.05501		unknown protein ;supported by full-length cDNA: Ceres:3365.
261591_at	At1g01740	0.985547	0.969617	0.595639	0.790249	0.521614	0.129593		NS	NS	NS		4.36553	4.36338	4.30142	4.28626		protein kinase, putative similar to protein kinase GB:BAA24694 GI:2852447 from [Arabidopsis thaliana]
261562_at	At1g01750	0.247207	0.202399	0.784267	0.278521	0.703658	0.661803		NS	NS	NS		2.94271	3.02868	2.92491	2.91567		actin depolymerizing factor, putative similar to actin depolymerizing factor 4 GB:AAD09110 GI:4185511 from [Arabidopsis thaliana];supported by full-length cDNA: Ceres:545.
261592_at	At1g01760	0.330941	0.978522	0.863553	0.294034	0.835448	0.160679		NS	NS	NS		4.22513	4.11718	4.24652	4.20159		double-stranded RNA-specific editase, putative similar to double-stranded RNA-specific editase GB:AAF69673 GI:7770275 from [Danio rerio]
261558_at	At1g01770	0.102653	0.630509	0.0953614	0.566075	0.0715807	0.370844		NS	NS	NS		5.18392	5.59228	5.651	5.6802		unknown protein
261559_at	At1g01780	0.182033	0.889263	0.976004	0.753535	0.16241	0.788193		NS	NS	NS		4.18727	4.49855	4.1819	4.44209		LIM domain protein, putative similar to LIM domain protein PLIM-2 GB:AAD15745 GI:4321401 from [Helianthus annuus]
261536_at	At1g01790	0.310075	0.882186	0.476245	0.821913	0.140425	0.44937		NS	NS	NS		8.30542	8.39454	8.36858	8.46496		K Efflux antiporter KEA1 identical to GB:AAD01191 GI:4101473 from [ Arabidopsis thaliana]; supported by cDNA: gi_4101472_gb_AF003382.1_AF003382
261537_at	At1g01800	0.092394	0.62802	0.876716	0.793439	0.46065	0.778527		NS	NS	NS		8.50391	8.35508	8.51543	8.421		carbonyl reductase, putative similar to carbonyl reductase (NADPH) GB:CAA59088 GI:666087 from [Rattus norvegicus]; supported by cDNA: gi_13878160_gb_AF370343.1_AF370343
261534_at	At1g01820	0.132024	0.60783	0.654696	0.621725	0.144486	0.661327		NS	NS	NS		7.6731	7.84084	7.71302	7.9074		unknown protein ;supported by full-length cDNA: Ceres:28475.
261538_at	At1g01830	0.518477	0.409583	0.784175	0.605571	0.164519	0.35472		NS	NS	NS		4.45353	4.50779	4.48542	4.58243		unknown protein ; supported by cDNA: gi_16604588_gb_AY059739.1_
261539_at	At1g01840	0.804186	0.773061	0.551235	0.202881	0.298426	0.178168		NS	NS	NS		4.08849	4.11165	4.15526	4.17841		hypothetical protein predicted by genemark.hmm; supported by cDNA: gi_16648713_gb_AY058133.1_
261652_at	At1g01860	0.687647	0.253613	0.306625	0.551363	0.353604	0.685445		NS	NS	NS		5.80697	5.75546	5.6876	5.9035		dimethyladenosine transferase, putative similar to dimethyladenosine transferase GB:AAC09322 GI:3005590 from [Arabidopsis thaliana]
261653_at	At1g01900	0.143468	0.377049	0.039545	0.033892	0.910449	0.130863		NS	NS	NS		4.15073	4.04881	4.30323	4.13192		subtilisin-like serine protease, putative contains similarity to cucumisin-like serine protease GB:AAC18851 GI:3176874 from [Arabidopsis thaliana]
261627_at	At1g01910	0.503691	0.0914981	0.522065	0.75598	0.969312	0.603691		NS	NS	NS		7.22339	7.2739	7.28207	7.22044		arsA homolog (hASNA-I), putative similar to arsA homolog (hASNA-I) GB:U60276 GI:1616740 from [Homo sapiens]; supported by cDNA: gi_15293140_gb_AY051004.1_
261654_at	At1g01920	0.00823133	0.18674	0.466155	0.0161898	0.163768	0.527935		NS	NS	NS		3.93786	3.69821	3.87159	3.81271		hypothetical protein contains similarity to ribulose-1,5 bisphosphate carboxylase GB:L34291 GI:508550 from [Pisum sativum]
261625_at	At1g01930	0.413213	0.232977	0.860549	0.829262	0.220836	0.870255		NS	NS	NS		4.81692	4.91458	4.83662	4.97077		hypothetical protein predicted by genemark.hmm;supported by full-length cDNA: Ceres:24737.
261655_at	At1g01940	0.00531244	0.525027	8.47893e-05	0.0577224	0.0115601	0.0356741		NS	8.47893e-05	NS		5.10684	4.81044	4.71721	4.82718		hypothetical protein predicted by genemark.hmm
261656_at	At1g01950	0.512124	0.97344	0.627322	0.839457	0.839033	0.0439487		NS	NS	NS		4.23169	4.18041	4.26812	4.21745		unknown protein similar to kinesin-like protein GB:CAB41097 GI:5541717 from [Arabidopsis thaliana]
261621_at	At1g01960	0.377922	0.0936027	0.754207	0.746355	0.180975	0.287694		NS	NS	NS		6.69952	6.77189	6.66657	6.58193		hypothetical protein similar to guanine nucleotide exchange factor-like protein GB:CAB82690 GI:7329696 from [Arabidopsis thaliana]
261622_at	At1g01970	0.0589879	0.421535	0.0237311	0.78206	0.155569	0.893081		NS	NS	NS		7.4004	7.12626	7.05249	7.23156		hypothetical protein predicted by genemark.hmm
261623_at	At1g01980	0.785153	0.781782	0.0643609	0.122213	0.817623	0.310643		NS	NS	NS		3.10713	3.13193	3.32016	3.12753		hypothetical protein similar to reticuline oxidase-like protein GB:CAB45849 GI:5262223 from [Arabidopsis thaliana]
261626_at	At1g01990	0.0463699	0.108785	0.160322	0.962662	0.146629	0.959828		NS	NS	NS		5.86299	5.74886	5.77256	5.75457		unknown protein ; supported by cDNA: gi_12083293_gb_AF332443.1_AF332443
261624_at	At1g02000	0.796165	0.881179	0.1146	0.898422	0.323147	0.511687		NS	NS	NS		5.08644	5.12835	4.93441	5.17165		nucleotide sugar epimerase, putative similar to nucleotide sugar epimerase GB:AAC18831 GI:3093975 from [Vibrio vulnificus];supported by full-length cDNA: Ceres:116833.
264169_at	At1g02020	0.00491778	0.121674	0.0325199	0.7109	0.00217832	0.418777		NS	NS	0.00217832		4.88455	5.29236	5.19897	5.30335		hypothetical protein predicted by genscan
264175_at	At1g02050	0.033187	0.0895288	0.503749	0.945375	0.576539	0.394634		NS	NS	NS		3.81459	3.90941	3.787	3.8627		unknown protein Similar to rice chalcone synthase homolog, gp|U90341|2507617 and anther specific protein, gp|Y14507|2326772
264167_at	At1g02060	0.0790302	0.363989	0.908988	0.807375	0.0145505	0.0171765		NS	NS	NS		3.13437	3.33119	3.1242	3.32661		unknown protein Location of EST gb|N95878
264151_at	At1g02070	0.995545	0.0769705	0.337442	0.56381	0.0160473	0.0783434		NS	NS	NS		3.44975	3.44947	3.49971	3.6358		hypothetical protein predicted by genefinder ;supported by full-length cDNA: Ceres:1693.
264168_at	At1g02080	0.305983	0.401323	0.0961072	0.376215	0.040512	0.87844		NS	NS	NS		7.16767	7.24519	7.31928	7.36257		unknown protein Similar to yeast general negative regulator of transcription subunit 1; Location of ESTs gb|T44328 and gb|AA395265
264150_at	At1g02090	0.0177132	0.538636	0.175228	0.847177	0.377081	0.825014		NS	NS	NS		5.84152	5.37736	5.58649	5.65522		unknown protein similar to FUS5 protein of the COP9 complex, GB:AAC25563;supported by full-length cDNA: Ceres:40042.
264171_at	At1g02100	0.481108	0.370231	0.920622	0.782854	0.654117	0.598463		NS	NS	NS		5.6169	5.70041	5.63064	5.56465		hypothetical protein predicted by genscan
264176_at	At1g02110	0.068897	0.750634	0.0994691	0.873561	0.00611801	0.0225744		NS	NS	NS		3.74768	3.98553	4.00805	4.08714		bZIP-like protein similar to bZIP (leucine zipper) protein, GenBank Accession Number 600855
264172_at	At1g02120	0.453627	0.0657831	0.172508	0.319893	0.842081	0.199794		NS	NS	NS		7.10516	7.16601	7.21734	7.12068		unknown protein
264122_at	At1g02130	0.819898	0.611815	0.323879	0.960201	0.43659	0.598264		NS	NS	NS		6.92386	6.90249	6.80559	6.99875		GTP-binding protein, ara-5 ras homolog; identical to gi|217840; supported by cDNA: gi_15450464_gb_AY052333.1_
264152_at	At1g02140	0.0420628	0.606196	0.107612	0.866132	0.0762867	0.420212		NS	NS	NS		8.13986	7.92016	7.98848	7.97317		Mago Nashi-like protein similar to Mago Nashi, Genbank Accession Number U03559;supported by full-length cDNA: Ceres:35733.
264177_at	At1g02150	0.515918	0.207988	0.1797	0.756707	0.367188	0.487732		NS	NS	NS		8.76015	8.69632	8.6042	8.65056		hypothetical protein contains Pfam profile: PF01535 PPR repeat
264173_at	At1g02160	0.118245	0.78235	0.736969	0.182044	0.599261	0.589525		NS	NS	NS		6.65628	6.74478	6.62895	6.72878		unknown protein
264178_at	At1g02170	0.710511	0.535387	0.0468703	0.466872	0.172545	0.632718		NS	NS	NS		6.0988	6.1582	6.43733	6.32585		latex-abundant protein, putative similar to latex-abundant protein GI:4235430 from (Hevea brasiliensis)
264179_at	At1g02180	0.104553	0.904626	0.0173301	0.765317	0.00637192	0.451746		NS	NS	NS		4.12604	4.35463	4.38766	4.38534		hypothetical protein predicted by genemark.hmm
264180_at	At1g02190	0.364584	0.0501891	0.123541	0.363846	0.316084	0.728781		NS	NS	NS		3.61835	3.56346	3.50856	3.67598		hypothetical protein contains similarity to receptor-like protein glossy1 homolog GI:2213643 from (Oryza sativa)
264147_at	At1g02200	8.91021e-06	0.0040135	0.0759773	0.91585	0.0604391	0.981427		8.91021e-06	NS	NS		8.80943	7.75176	8.21336	8.53234		receptor-like protein glossy1 (gl1), putative similar to receptor-like protein glossy1 (gl1) GI:1209703 from (Arabidopsis thaliana)
264146_at	At1g02205	4.8514e-05	0.0424346	0.0675004	0.742315	0.0225058	0.91553		4.8514e-05	NS	NS		9.67264	8.71957	9.08452	9.41885		hypothetical protein contains similarity to lipid transfer protein GI:498038 from (Senecio odorus)
264148_at	At1g02220	0.189414	0.374411	0.0301214	0.4173	0.324567	0.209094		NS	NS	NS		2.86273	2.9311	2.98834	2.96772		NAM (no apical meristem)-like protein, putative similar to NAM (no apical meristem)-like protein GI:9759589 from (Arabidopsis thaliana)
264174_s_at	At1g02230	0.14331	0.396427	0.476799	0.78742	0.265452	0.345477		NS	NS	NS		3.31189	3.20305	3.26769	3.19898		hypothetical protein
264149_at	At1g02250	0.507383	0.706781	0.432272	0.00933016	0.0302971	0.0983352		NS	NS	NS		3.17504	3.10437	3.135	3.02505		NAM (no apical meristem)-like protein, putative similar to NAM (no apical meristem)-like protein GI:5306267 from (Arabidopsis thaliana)
264170_at	At1g02260	0.574048	0.766343	0.142113	0.331988	0.0455	0.242892		NS	NS	NS		5.51142	5.58291	5.67715	5.74825		hypothetical protein
264123_at	At1g02270	0.10779	0.437718	0.102453	0.619716	0.019599	0.870671		NS	NS	NS		6.20168	6.51436	6.50732	6.66114		unknown protein ; supported by cDNA: gi_15450672_gb_AY052704.1_
264121_at	At1g02280	0.727578	0.752145	0.964563	0.448466	0.612181	0.54574		NS	NS	NS		7.33453	7.27739	7.3273	7.24965		putative GTP-binding protein Carboxyl-terminal end highly similar to GTP-binding protein gb|U43377, location of EST gb|AA394770 and gb|R30089; supported by cDNA: gi_14596162_gb_AY042869.1_
259441_at	At1g02300	0.947202	0.781006	0.875433	0.828526	0.882712	0.89438		NS	NS	NS		7.11674	7.15826	7.01854	7.20882		cathepsin B-like cysteine protease, putative similar to cathepsin B-like cysteine proteinase GI:609175 from [Nicotiana rustica]
259416_at	At1g02305	0.77675	0.22027	0.46935	0.228927	0.78581	0.310687		NS	NS	NS		8.68245	8.665	8.73483	8.70944		Expressed protein ; supported by cDNA: gi_14532525_gb_AY039887.1_
259442_at	At1g02310	0.654201	0.85447	0.526395	0.206531	0.293775	0.519166		NS	NS	NS		3.78453	3.8259	3.84016	3.88659		(1-4)-beta-mannan endohydrolase precursor, putative similar to (1-4)-beta-mannan endohydrolase precursor GI:9836826 from [Lycopersicon esculentum]
259413_at	At1g02320	0.0854844	0.255985	0.925319	0.653932	0.518325	0.0582924		NS	NS	NS		3.02213	3.11192	3.02634	3.05798		hypothetical protein contains similarity to expansin
259415_at	At1g02330	0.0328129	0.622532	0.202978	0.594577	0.0138647	0.260517		NS	NS	NS		5.02185	5.36515	5.30028	5.27914		hypothetical protein contains similarity to hepatocellular carcinoma-associated antigen 59 GI:7158847 from [Homo sapiens]; supported by cDNA: gi_13937156_gb_AF372932.1_AF372932
259417_at	At1g02340	0.765156	0.839345	0.40455	0.367638	0.208725	0.328857		NS	NS	NS		3.27116	3.2974	3.20323	3.38447		unknown protein contains similarity to phytochrome interacting factor 3 GI:3929586 from [Arabidopsis thaliana]; supported by cDNA: gi_11870114_gb_AF324245.1_AF324245
259443_at	At1g02360	0.904196	0.137825	0.394177	0.915577	0.152304	0.192954		NS	NS	NS		4.47692	4.49618	4.60117	4.70895		chitinase, putative similar to chitinase GI:1237025 from [Arachis hypogaea]
259444_at	At1g02370	0.0610404	0.474502	0.0621561	0.511457	0.0438311	0.958788		NS	NS	NS		3.94526	3.72358	3.74087	3.72812		hypothetical protein predicted by genscan+
259418_at	At1g02390	0.635201	0.317045	0.886257	0.0942366	0.585971	0.0757987		NS	NS	NS		4.04984	4.12653	4.0646	3.98087		unknown protein ; supported by cDNA: gi_16930412_gb_AF419560.1_AF419560
259445_at	At1g02400	0.407479	0.8667	0.391679	0.777471	0.318571	0.758822		NS	NS	NS		3.79293	3.5323	3.52229	3.47412		dioxygenase, putative similar to dioxygenase GI:1666096 from [Marah macrocarpus]
259446_at	At1g02410	0.193792	0.903145	0.0129587	0.261455	0.0283726	0.569808		NS	NS	NS		5.91004	6.03995	6.17468	6.13563		hypothetical protein contains similarity to cytochrome c oxidase assembly protein cox11 GI:1244782 from [Saccharomyces cerevisiae]
259414_at	At1g02420	0.521636	0.741946	0.197424	0.652361	0.354087	0.379998		NS	NS	NS		4.08274	4.14238	4.18556	4.16639		hypothetical protein contains Pfam profile: PF01535 PPR repeat
259447_s_at	At1g02430	0.507553	0.345113	0.412105	0.291411	0.18397	0.0771289		NS	NS	NS		3.70301	3.61888	3.63577	3.58312		ADP-ribosylation factor, putative similar to ADP-ribosylation factor GI:166586 from [Arabidopsis thaliana]
260904_at	At1g02450	0.00218851	0.69932	0.313742	0.181657	0.33465	0.968577		0.00218851	NS	NS		4.7164	3.80077	4.50143	4.44725		unknown protein
260903_at	At1g02460	0.403348	0.741472	0.866065	0.899575	0.284372	0.439091		NS	NS	NS		4.25253	4.14144	4.27541	4.40719		polygalacturonase PG1, putative similar to polygalacturonase PG1 GB:AAD46483 GI:5669846 from (Glycine max)
260933_at	At1g02470	0.439278	0.416691	0.266127	0.0713578	0.807324	0.941013		NS	NS	NS		3.70774	3.64214	3.79731	3.68057		hypothetical protein contains non-consensus splice sites.; supported by full-length cDNA: Ceres:29906.
260916_at	At1g02475	0.125823	0.878159	0.382908	0.863217	0.960102	0.42764		NS	NS	NS		8.88565	8.74557	8.82025	8.87809		predicted protein ; supported by cDNA: gi_13878058_gb_AF370292.1_AF370292
260911_at	At1g02490	0.538435	0.583472	0.488537	0.136204	0.694867	0.953037		NS	NS	NS		3.24059	3.17536	3.1692	3.20077		hypothetical protein predicted by genemark.hmm
260913_at	At1g02500	0.460062	0.369244	0.128755	0.609444	0.596417	0.115779		NS	NS	NS		9.49683	9.53544	9.59089	9.46395		s-adenosylmethionine synthetase identical to s-adenosylmethionine synthetase GB:P23686 from [Arabidopsis thaliana]; supported by full-length cDNA: Ceres: 37800.
260932_s_at	At1g02530	0.0958702	0.702685	0.86946	0.248981	0.976174	0.448802		NS	NS	NS		2.68673	2.80608	2.69459	2.6888		hypothetical protein contains similarity to multidrug resistance protein 3 GB:P23174 from [Cricetulus griseus]
260906_at	At1g02540	0.110948	0.381423	0.0452385	0.20725	0.115908	0.594693		NS	NS	NS		2.9872	3.07608	3.1264	3.06665		hypothetical protein predicted by genemark.hmm
260931_at	At1g02550	0.816981	0.47765	0.27905	0.493868	0.0422296	0.424021		NS	NS	NS		3.5613	3.54214	3.66703	3.77682		hypothetical protein predicted by genemark.hmm
260912_at	At1g02560	0.172094	0.499263	0.0883986	0.732322	0.646496	0.81698		NS	NS	NS		10.6542	10.565	10.5764	10.682		ATP-dependent Clp protease proteolytic subunit (ClpP5) identical to nClpP1 GB:BAA82065 GI:5360579 from [Arabidopsis thaliana];supported by full-length cDNA: Ceres:106825.
260907_at	At1g02570	0.105593	0.830324	0.675515	0.178054	0.295429	0.553895		NS	NS	NS		3.77866	3.90776	3.74403	3.88223		hypothetical protein predicted by genscan+
260908_at	At1g02580	0.633122	0.438732	0.183242	0.250047	0.079491	0.012199		NS	NS	NS		3.60297	3.57618	3.71744	3.71457		maternal embryogenesis control protein (MEDEA), putative similar to MEDEA GB:AAC39446 GI:3089625 from [Arabidopsis thaliana]
260930_at	At1g02620	0.0601463	0.521581	0.647334	0.993687	0.164014	0.507418		NS	NS	NS		3.70555	4.01418	3.74948	3.89364		GTP-binding protein Sar1, putative similar to GTP-binding protein Sar1 GB:O04834 from [Arabidopsis thaliana]
260914_at	At1g02640	0.0549841	0.930612	0.0356091	0.308739	0.223579	0.492785		NS	NS	NS		4.17358	4.46656	4.49066	4.37907		beta-xylosidase, putative similar to beta-xylosidase GB:Z84377 GI:2102655 from [Aspergillus niger]; supported by cDNA: gi_14194120_gb_AF367266.1_AF367266
260915_at	At1g02660	0.00206552	0.939238	0.0549643	0.409113	0.503567	0.803697		0.00206552	NS	NS		4.01472	4.62678	4.3182	4.1081		hypothetical protein similar to hypothetical protein GB:CAB83109 GI:7362739 from [Arabidopsis thaliana]; supported by cDNA: gi_15081706_gb_AY048246.1_
260909_at	At1g02670	0.732444	0.703809	0.78507	0.143398	0.828811	0.189963		NS	NS	NS		3.63788	3.59606	3.66216	3.61173		hypothetical protein predicted by genemark.hmm
260929_at	At1g02680	0.146429	0.617445	0.487013	0.251409	0.0667979	0.173358		NS	NS	NS		3.97902	4.18945	4.11549	4.27116		transcription factor TFIID, putative similar to transcription factor TFIID GB:X84003 GI:791052 from [Homo sapiens]
260910_at	At1g02690	0.221363	0.611112	0.592601	0.974436	0.0940327	0.158954		NS	NS	NS		4.05305	3.94033	3.99292	3.88935		importin alpha, putative similar to importin alpha GB:AAC27644 GI:3342556 from [Arabidopsis thaliana]
260917_at	At1g02700	0.334201	0.843186	0.797601	0.202153	0.80464	0.69938		NS	NS	NS		4.03379	4.10176	4.05013	4.01408		unknown protein similar to hypothetical protein GB:CAB80707 GI:7268598 from [Arabidopsis thaliana]; supported by cDNA: gi_15810578_gb_AY056328.1_
260905_at	At1g02710	0.204341	0.624175	0.984893	0.88653	0.643867	0.0268432		NS	NS	NS		4.37041	4.22301	4.36759	4.42724		hypothetical protein predicted by genemark.hmm
260928_at	At1g02720	0.686767	0.240123	0.504844	0.568649	0.599809	0.560689		NS	NS	NS		4.44845	4.39967	4.35396	4.38671		hypothetical protein similar to putative glycosyl transferase GB:CAB80706 GI:7268597 from [Arabidopsis thaliana]
262109_at	At1g02730	0.106456	0.410558	0.751501	0.0605479	0.981641	0.0944646		NS	NS	NS		4.24547	4.05965	4.27985	4.24815		hypothetical protein similar to cellulose synthase catalytic subunit GB:AAC39336 GI:2827143 from (Arabidopsis thaliana)
262108_at	At1g02740	0.0834425	0.512283	0.40042	0.953873	0.245786	0.430867		NS	NS	NS		4.26683	4.51824	4.36554	4.4056		unknown protein similar to unknown protein GB:AAF02891 GI:6056427 from (Arabidopsis thaliana)
262107_at	At1g02750	0.127152	0.365407	0.54119	0.930268	0.0770129	0.269175		NS	NS	NS		4.85273	5.03259	4.92085	5.11158		hypothetical protein predicted by genemark.hmm
262117_at	At1g02780	0.0927746	0.946873	0.0590588	0.948933	0.0691978	0.31179		NS	NS	NS		10.7364	10.5883	10.5362	10.5694		ribosomal protein L19, putative similar to ribosomal protein L19 GI:36127 from [Homo sapiens];supported by full-length cDNA: Ceres:2906.
262122_at	At1g02790	0.0196396	0.731294	0.198685	0.712959	0.0771846	0.357269		NS	NS	NS		3.18669	3.35203	3.27551	3.2708		polygalacturonase, putative similar to polygalacturonase GI:288611 from [Zea mays]; supported by cDNA: gi_16226534_gb_AF428425.1_AF428425
262121_at	At1g02800	0.919755	0.686576	0.859415	0.646036	0.100398	0.354315		NS	NS	NS		3.80868	3.80219	3.82145	3.95167		endo-1,4-beta-glucanase precursor, putative similar to endo-1,4-beta-glucanase precursor GI:924622 from [Lycopersicon esculentum]; supported by cDNA: gi_3132890_gb_AF034573.1_AF034573
262105_at	At1g02810	0.0177813	0.142609	0.122103	0.895374	0.540895	0.573873		NS	NS	NS		3.15043	3.3524	3.27505	3.21444		pectin esterase, putative similar to pectin esterase GI:1213628 from [Prunus persica]
262115_at	At1g02813	0.103278	0.879908	0.925042	0.704058	0.901485	0.320392		NS	NS	NS		3.03158	3.12206	3.0389	3.02328		Expressed protein ; supported by full-length cDNA: Ceres: 1632.
262116_at	At1g02816	0.722821	0.545578	0.0707276	0.399741	0.000950383	0.276771		NS	NS	0.000950383		6.27443	6.33994	6.63202	5.90308		Expressed protein ; supported by full-length cDNA: Ceres: 28445.
262113_at	At1g02820	1.44665e-05	0.0874206	0.00505754	0.541811	1.18018e-05	0.339643		1.44665e-05	NS	1.18018e-05		3.90649	4.47936	4.29246	4.58228		late embryogenis abundant protein, putative similar to late embryogenis abundant protein 5 GI:2981167 from [Nicotiana tabacum];supported by full-length cDNA: Ceres:96540.
262132_at	At1g02830	0.754901	0.0727606	0.402482	0.649191	0.921912	0.279547		NS	NS	NS		3.38449	3.36487	3.43848	3.3907		ribosomal protein L22, putative similar to ribosomal protein L22 GI:710294 from [Rattus norvegicus]
262110_at	At1g02840	0.0634537	0.981402	0.696344	0.231036	0.306324	0.4304		NS	NS	NS		7.59312	7.73684	7.62216	7.66304		SF2/ASF-like splicing modulator Srp30, putative similar to SF2/ASF-like splicing modulator Srp30 GI:4775270 from [Arabidopsis thaliana];supported by full-length cDNA: Ceres:19681.
262118_at	At1g02850	0.540011	0.00678338	0.423656	0.235676	0.997973	0.6586		NS	NS	NS		4.32182	4.43766	4.5355	4.3215		beta-glucosidase, putative similar to beta-glucosidase GI:5030906 from [Polygonum tinctorium]; supported by cDNA: gi_15146265_gb_AY049274.1_
262114_at	At1g02860	0.101996	0.125266	0.0292509	0.641275	0.00670165	0.637459		NS	NS	NS		4.8922	5.11543	5.18895	5.38797		unknown protein contains similarity to peroxin-2 GI:6103008 from [Pichia pastoris];supported by full-length cDNA: Ceres:96370.
262112_at	At1g02870	0.0560253	0.600429	0.0740301	0.518475	0.0780106	0.10934		NS	NS	NS		6.04082	5.73173	5.76571	5.72879		unknown protein ;supported by full-length cDNA: Ceres:5556.
262130_at	At1g02890	0.209001	0.0985468	0.859017	0.106809	0.0169512	0.00532786		NS	NS	NS		6.07529	6.15411	6.05819	6.2687		hypothetical protein predicted by genemark.hmm
262131_at	At1g02900	0.943263	0.684651	0.963085	0.565116	0.774397	0.467208		NS	NS	NS		3.65499	3.64802	3.65867	3.68563		hypothetical protein predicted by genemark.hmm
262104_at	At1g02910	0.308389	0.290792	0.124261	0.936083	0.0637326	0.106763		NS	NS	NS		7.45544	7.31654	7.34589	7.30187		hypothetical protein predicted by genemark.hmm
262119_s_at	At1g02930	0.303847	0.183136	0.0520815	0.857231	0.213647	0.96525		NS	NS	NS		6.90979	7.46814	7.9495	7.48424		glutathione S-transferase, putative similar to glutathione S-transferase GI:860955 from [Hyoscyamus muticus]; supported by cDNA: gi_15215607_gb_AY050332.1_
262103_at	At1g02940	0.587415	0.816675	0.754467	0.991975	0.725227	0.457757		NS	NS	NS		2.99907	2.93647	2.96541	2.95891		glutathione S-transferase, putative similar to glutathione S-transferase GI:860955 from [Hyoscyamus muticus]
262120_at	At1g02950	0.640899	0.193197	0.165512	0.980452	0.013097	0.723799		NS	NS	NS		3.70475	3.74463	3.85039	3.99969		glutathione-S-transferase, putative similar to glutathione-S-transferase GI:169887 from [Silene vulgaris]; supported by cDNA: gi_11878270_gb_AF320055.1_AF320055
262111_at	At1g02960	0.104788	0.136464	0.221019	0.802486	0.480911	0.231817		NS	NS	NS		5.12236	5.28014	5.25061	5.18911		hypothetical protein predicted by genemark.hmm;supported by full-length cDNA: Ceres:116121.
262106_at	At1g02970	0.1537	0.303239	0.377071	0.0126169	0.93357	0.074472		NS	NS	NS		3.62138	3.4988	3.57302	3.61663		hypothetical protein similar to Wee1-like protein GI:5821717 from [Zea mays]
262102_at	At1g02980	0.653677	0.945609	0.61583	0.428407	0.899171	0.873462		NS	NS	NS		3.578	3.62624	3.52497	3.56452		hypothetical protein contains similarity to cullin-4A GI:3599676 from [Homo sapiens]
263170_at	At1g03000	0.0791122	0.365687	0.260574	0.683601	0.0337747	0.531244		NS	NS	NS		5.97229	6.19033	6.05774	6.15557		putative peroxisome assembly factor-2 Belongs to PF|00004 ATPases associated with various cellular activities
263169_at	At1g03010	0.116703	0.374022	0.116433	0.0907051	0.0661768	0.574269		NS	NS	NS		2.99996	3.10554	3.11135	3.14428		hypothetical protein similar to unknown protein GB:AAC63640
263168_at	At1g03020	0.201885	0.737519	0.441008	0.0179657	0.222897	0.220782		NS	NS	NS		4.52153	4.87485	4.36511	4.24332		putative glutaredoxin Strong similarity to gb|Z49699 glutaredoxin from Ricinus communis
263167_at	At1g03030	0.509833	0.404991	0.923848	0.250376	0.0477872	0.434586		NS	NS	NS		5.67323	5.60722	5.66288	5.42225		unknown protein Belongs to PF|01121 Uncharacterized protein family UPF0038 containing ATP/GTP binding domain. ESTs gb|AA585719, gb|AA728503 and gb|T22272 come from this gene
263117_at	At1g03040	0.850127	0.887658	0.299913	0.897857	0.211295	0.534007		NS	NS	NS		6.40379	6.41845	6.33596	6.30898		putative lipoamide dehydrogenase component of the pyruvate dehydrogenase complex E3, contains PF|00010 helix-loop-helix DNA-binding domain. ESTs gb|T45640 and gb|T22783 come from this gene; supported by cDNA: gi_15450778_gb_AY054469.1_
263166_at	At1g03050	0.236305	0.911591	0.473395	0.593163	0.861335	0.298384		NS	NS	NS		2.99236	3.09219	3.05033	3.00926		putative protein destination factor Similar to clathrin assembly protein gb|AF041374 (CALM) from Rattus norvegicus
263115_at	At1g03055	0.348124	0.149025	0.0536159	0.47755	0.166972	0.627977		NS	NS	NS		3.56922	3.69135	3.65821	3.60838		Expressed protein ; supported by cDNA: gi_14488101_gb_AF389299.1_AF389299
263165_at	At1g03060	0.390632	0.38243	0.568677	0.804208	0.951304	0.218391		NS	NS	NS		5.20613	5.13821	5.30389	5.21104		putataive transport protein Similar to gb|U70015 lysosomal trafficking regulator from Mus musculus and contains 2 PF|00400 WD40, G-beta repeats. ESTs gb|T43386 and gb|AA395236 come from this gene
263164_at	At1g03070	0.9198	0.107231	0.577813	0.057098	0.519662	0.104831		NS	NS	NS		4.07596	4.07072	4.02942	4.12321		putative glutamate/aspartate-binding peptide Belongs to the PF|01027 Uncharacterized protein family UPF0005 with 7 transmembrane domains
263112_at	At1g03080	0.201279	0.950381	0.205505	0.486172	0.0374473	0.079248		NS	NS	NS		4.13699	4.30185	4.32915	4.47927		unknown protein Strong similarity to gi|2244833 centromere protein homolog from Arabidopsis thaliana chromosome 4 contig gb|Z97337. ESTs gb|T20765 and gb|AA586277 come from this gene
263118_at	At1g03090	0.00025056	0.629182	0.00272549	0.49759	0.000497072	0.924036		0.00025056	NS	0.000497072		5.76312	6.38181	6.37852	6.35349		putative 3-methylcrotonyl-CoA carboxylase ESTs gb|H35836, gb|AA651295 and gb|AA721862 come from this gene; supported by cDNA: gi_533706_gb_U12536.1_ATU12536
263143_at	At1g03100	0.298073	0.0780848	0.336592	0.159323	0.346696	0.536195		NS	NS	NS		3.84114	3.74443	3.75854	3.74751		hypothetical protein Contains PF|00637 Clathrin 7-fold repeat. EST gb|AA721862 comes from this gene
263119_at	At1g03110	0.982061	0.703314	0.186352	0.750875	0.459195	0.358278		NS	NS	NS		4.31369	4.31688	4.15273	4.39965		hypothetical protein predicted by genefinder, contains 2 PF|00400 WD40, G-beta repeats; supported by cDNA: gi_13877930_gb_AF370228.1_AF370228
263114_at	At1g03130	2.67858e-05	0.639314	2.90159e-06	0.0459296	7.20998e-07	0.93321		2.67858e-05	2.90159e-06	7.20998e-07		11.2425	11.8868	11.7838	11.8949		putative photosystem I reaction center subunit II precursor Strong similarity to gb|X14017 from Spinacia oleracea. ESTs gb|R30423, gb|T42998, gb|Z18178, gb|T14133, gb|N65521, gb|T42498, gb|T41918, gb|N38024, gb|R65109, gb|T43849, gb|AA394388, gb|T20925 and;supported by full-length cDNA: Ceres:2757.
263116_s_at	At1g03140	0.0145585	0.960119	0.0123503	0.922754	0.0174339	0.658295		NS	NS	NS		5.98123	6.48788	6.51093	6.44027		unknown protein Similar to gb|U51990 pre-mRNA-splicing factor hPrp18 from Homo sapiens. ESTs gb|T46391 and gb|AA721815 come from this gene; supported by cDNA: gi_15293172_gb_AY051020.1_
263113_at	At1g03150	0.00647413	0.686648	0.074892	0.459956	0.00125413	0.169866		NS	NS	0.00125413		5.33167	5.90041	5.5269	5.79278		unknown protein Belongs to PF|00583 Acetyltransfersase (GNAT) family; supported by full-length cDNA: Ceres: 10117.
263163_at	At1g03160	0.608202	0.692798	0.505532	0.458242	0.656997	0.293539		NS	NS	NS		6.7469	6.80168	6.66902	6.79397		fructokinase, putative predicted by genefinder
264363_at	At1g03170	0.335084	0.862558	0.120785	0.0374438	0.103971	0.0396391		NS	NS	NS		3.37586	3.43307	3.46795	3.27193		hypothetical protein predicted by genefinder;supported by full-length cDNA: Ceres:36143.
264358_at	At1g03180	0.057631	0.273233	0.018845	0.790314	0.847739	0.929278		NS	NS	NS		3.46645	3.29748	3.27726	3.45025		hypothetical protein predicted by genefinder
264356_at	At1g03190	0.292229	0.0375336	0.0857309	0.0503273	0.214667	0.436038		NS	NS	NS		3.99287	3.95061	3.89593	3.91632		putative DNA repair protein Strong similarity to gb|U04968 nucleotide excision repair protein (ERCC2) from Cricetulus grisseus; supported by cDNA: gi_6503085_gb_AF188623.1_AF188623
264355_at	At1g03210	0.106078	0.279071	0.372239	0.553142	0.872124	0.938543		NS	NS	NS		6.47269	6.0391	6.72033	6.42952		unknown protein similar to PHZF, catalyzing the hydroxylation of phenazine-1-carboxylic acid to2-hydroxy-phenazine-1-carboxylic acid; ESTs gb|H37641 and gb|AA651422 come from this gene
264365_s_at	At1g03220	0.0329106	0.0792176	0.00177063	0.37483	0.017543	0.962869		NS	NS	NS		6.14003	6.47874	6.65121	6.41968		unknown protein Strong similarity to gb|D14550 extracellular dermal glycoprotein (EDGP) precursor from Daucus carota. ESTs gb|H37281, gb|T44167, gb|T21813, gb|N38437, gb|Z26470, gb|R65072, gb|N76373, gb|F15470, gb|Z35182, gb|H76373, gb|Z34678 and gb|Z35387 come from this
264354_s_at	At1g03240	0.779553	0.442632	0.356939	0.966134	0.951867	0.52069		NS	NS	NS		3.00268	3.02042	2.94537	3.00754		unknown protein similar to Lambda-PRL2 Arabidopsis thaliana cDNA clone GB:R30041
264366_at	At1g03250	0.389991	0.125621	0.176787	0.00322841	0.491075	0.428583		NS	NS	NS		6.11431	6.03409	6.0502	6.1916		unknown protein EST gb|N96383 comes from this gene;supported by full-length cDNA: Ceres:40461.
264353_at	At1g03260	0.764189	0.579514	0.173274	0.664167	0.835691	0.317426		NS	NS	NS		4.89437	4.8429	4.72804	4.87068		hypothetical protein predicted by genscan
264352_at	At1g03270	0.209156	0.42553	0.372936	0.972376	0.0542806	0.799887		NS	NS	NS		3.29593	3.4044	3.44295	3.50512		unknown protein Strong similarity to gi|2244780 hypothetical protein from Arabidopsis thaliana chromosome 4 contig gb|Z97335
264368_at	At1g03280	0.508889	0.732202	0.920498	0.651409	0.946393	0.479776		NS	NS	NS		6.05202	6.15824	6.03547	6.04046		hypothetical protein Contains similarity to transcription initiation factor IIE, alpha subunit gb|X63468 from Homo sapiens; supported by cDNA: gi_15810380_gb_AY056229.1_
264362_at	At1g03290	0.17958	0.447462	0.0718025	0.265447	0.551541	0.898929		NS	NS	NS		6.32769	6.08118	6.605	6.23804		unknown protein ESTs gb|H36966, gb|R65511, gb|T42324 and gb|T20569 come from this gene
264361_at	At1g03300	0.0227817	0.0159984	0.151629	0.671129	0.567814	0.876294		NS	NS	NS		4.09747	4.31611	4.31558	4.1546		unknown protein Strong similarity to T08I13.7 gi|2275201 unknown protein from Arabidopsis thaliana BAC gb|AC002337. EST gb|Z17450 comes from this gene
264360_at	At1g03310	0.12922	0.407837	0.275467	0.692133	0.805789	0.966569		NS	NS	NS		8.0509	7.87631	7.93495	8.07725		putative isoamylase Similar to gi|1652733 glycogen operon protein GlgX from Synechocystis sp. genome gb|D90908. ESTs gb|H36690, gb|AA712462, gb|AA651230 and gb|N95932 come from this gene
264359_at	At1g03320	0.595234	0.962241	0.334399	0.701406	0.327325	0.570916		NS	NS	NS		3.32242	3.40689	3.45139	3.46422		hypothetical protein predicted by genefinder
264364_at	At1g03330	0.91376	0.337677	0.707896	0.539873	0.214741	0.10529		NS	NS	NS		6.79382	6.78007	6.84574	6.95079		unknown protein Similar to gb|U85207 snRNP core Sm protein homolog Sm-X5 from Mus musculus. EST gb|AA612141 comes from this gene;supported by full-length cDNA: Ceres:18060.
264367_at	At1g03350	0.0107004	0.48258	1.03649e-05	0.72473	0.00873649	0.0655805		NS	1.03649e-05	NS		7.02692	6.89675	6.75677	6.8245		unknown protein ESTs gb|T21276, gb|T45403, and gb|AA586113 come from this gene; supported by cDNA: gi_15293190_gb_AY051029.1_
264357_at	At1g03360	0.00017961	0.119648	0.000108993	0.668076	0.000614804	0.136315		0.00017961	0.000108993	0.000614804		4.36617	3.80969	3.77339	3.86967		hypothetical protein Similar to hypothetical protein SPAC2F7.14c gi|1052797 from Schizosaccharomyces pombe cosmid gb|Z50142
264351_at	At1g03370	0.290622	0.524284	0.77972	0.613132	0.682952	0.20108		NS	NS	NS		5.71069	5.49309	5.68665	5.67487		unknown protein Contains similarity to gb|AB011110 KIAA0538 protein from Homo sapiens brain and to phospholipid-binding domain C2 PF|00168. ESTs gb|AA585988 and gb|T04384 come from this gene
264828_at	At1g03380	0.0085778	0.124282	0.027586	0.958948	0.0102057	0.408593		NS	NS	NS		5.28041	5.83268	5.82666	5.8445		hypothetical protein predicted by genscan
264827_at	At1g03390	0.48124	0.179371	0.300957	0.152638	0.865418	0.109201		NS	NS	NS		3.39215	3.44802	3.47848	3.40518		hypothetical protein similar to anthranilate N-hydroxycinnamoyl/benzoyltransferase
264843_at	At1g03400	0.0177914	0.705983	0.878653	0.8381	0.215764	0.536583		NS	NS	NS		8.10985	7.59429	8.09056	7.87215		putative 1-aminocyclopropane-1-carboxylate oxidase similar to ESTs emb|Z34690, gb|T04168, gb|H37738, gb|T76913, gb|T43801, amd gb|T21964; supported by cDNA: gi_15146295_gb_AY049289.1_
264826_at	At1g03410	0.27641	0.353527	0.71111	0.51308	0.740485	0.676		NS	NS	NS		3.69144	3.56829	3.64856	3.66012		putative 1-aminocyclopropane-1-carboxylate oxidase similar to ESTs emb|Z34690, gb|T04168, gb|H37738, gb|T76913, gb|T43801, amd gb|T21964
264824_at	At1g03420	0.00708927	0.357165	0.000850047	0.181527	0.00198135	0.78396		NS	0.000850047	0.00198135		6.84706	6.54076	6.47834	6.45948		unknown protein similar to gb|T45484, emb|Z30724, and emb|Z30531
264838_at	At1g03430	0.0132821	0.626586	0.699465	0.883844	0.459794	0.735002		NS	NS	NS		6.53215	6.28151	6.50215	6.45116		putative AHP2 similar to GB:BAA36336;supported by full-length cDNA: Ceres:452.
264840_at	At1g03440	0.767326	0.52856	0.00419943	0.575271	0.254449	0.540035		NS	NS	NS		4.53335	4.57291	4.8099	4.64176		unknown protein similar to leucine-rich repeat protein GB:AAC79105; supported by cDNA: gi_12083225_gb_AF332409.1_AF332409
264823_at	At1g03445	0.847709	0.399866	0.627099	0.402371	0.624492	0.32206		NS	NS	NS		4.15084	4.13226	4.10217	4.10118		putative serine/threonine protein phosphatase
264822_at	At1g03457	0.337491	0.635533	0.159025	0.534826	0.00897013	0.0707045		NS	NS	NS		3.86422	3.73806	3.71751	3.59946		putative ribonucleoprotein
264821_at	At1g03470	0.482066	0.704239	0.300993	0.220682	0.644262	0.543214		NS	NS	NS		3.82819	3.74886	3.7134	3.87303		hypothetical protein predicted by genefinder
264820_at	At1g03475	0.187852	0.635527	0.767165	0.910804	0.845541	0.6785		NS	NS	NS		8.02708	7.83139	7.98642	8.05301		putative coproporphyrinogen III oxidase similar to GB:S39523 and ESTs gb|AA586260 and dbj|D48620; supported by cDNA: gi_14624991_dbj_AB044394.1_AB044394
264829_at	At1g03490	0.470697	0.4009	0.308968	0.0425162	0.358602	0.852021		NS	NS	NS		3.04832	3.11234	3.1393	3.13138		hypothetical protein predicted by genscan
265091_s_at	At1g03495	0.709582	0.873851	0.221359	0.0554605	0.854461	0.282085		NS	NS	NS		3.3695	3.33837	3.29895	3.39003		hypothetical protein similar to Anthocyanin 5-aromatic acyltransferase GB:BAA74428
264819_at	At1g03510	0.291536	0.0206043	0.223625	0.739895	0.184312	0.577575		NS	NS	NS		3.6812	3.57732	3.57043	3.55056		hypothetical protein similar to membrane associated salt inducible protein isolog; similar to F21B7.16 and F21B7.18
264844_at	At1g03520	0.270623	0.546497	0.980149	0.719233	0.23102	0.144033		NS	NS	NS		5.07345	5.15147	5.07149	5.16806		putative glycosylation enzyme ; supported by cDNA: gi_15292806_gb_AY050837.1_
264818_at	At1g03530	0.509614	0.893832	0.382843	0.831721	0.77562	0.843118		NS	NS	NS		4.08874	3.99161	3.94597	4.05042		hypothetical protein similar to hypothetical protein GB:O14360
264817_at	At1g03540	0.319418	0.115143	0.0776498	0.0812353	0.848554	0.0555042		NS	NS	NS		3.89582	3.81272	3.76862	3.88146		hypothetical protein similar to membrane associated salt inducible protein isolog; similar to F21B7.16 and F21B7.21
264835_at	At1g03550	0.165453	0.616875	0.153568	0.998458	0.000183588	0.687168		NS	NS	0.000183588		4.04398	4.15836	4.21132	4.40384		unknown protein similar to unknown protein GB:AAD20911;supported by full-length cDNA: Ceres:30006.
264816_at	At1g03560	0.106374	0.355068	0.604796	0.529888	0.871457	0.94914		NS	NS	NS		3.80882	3.54384	3.72419	3.83271		hypothetical protein similar to membrane associated salt inducible protein isolog; similar to F21B7.18 and F21B7.21
264833_at	At1g03590	0.724715	0.387408	0.452274	0.745061	0.217651	0.583058		NS	NS	NS		4.91184	4.87185	4.83485	4.77419		putative protein phosphatase similar to GB:AAB97706
264837_at	At1g03600	0.301208	0.676522	0.499837	0.0550134	0.506396	0.906166		NS	NS	NS		10.8744	10.9101	10.9065	10.9072		unknown protein similar to ESTs emb|Z27038, gb|AA451546, emb|Z29876, gb|T45359 and gb|R90316;supported by full-length cDNA: Ceres:111449.
264836_at	At1g03610	0.00386638	0.454059	0.0172021	0.485507	0.0153139	0.491461		NS	NS	NS		5.43817	5.97603	5.81706	5.80741		unknown protein similar to hypothetical protein GB:AAD11584;supported by full-length cDNA: Ceres:123030.
264815_at	At1g03620	0.388243	0.868777	0.744625	0.343882	0.226934	0.343504		NS	NS	NS		3.49029	3.56215	3.53214	3.56723		hypothetical protein similar to hypothetical protein GB:AAC27479
264839_at	At1g03630	0.0608267	0.201763	0.370717	0.83874	0.291372	0.5098		NS	NS	NS		10.0077	9.84089	9.91036	9.91264		putative protochlorophyllide reductase similar to protochlorophyllide reductase precusor; similar to ESTs gb|R30630, gb|T46162, emb|Z26728, gb|AA042736, and gb|AA042730;supported by full-length cDNA: Ceres:7573.
264832_at	At1g03660	0.124394	0.625731	0.50006	0.404046	0.814545	0.85481		NS	NS	NS		3.54914	3.35078	3.45514	3.57405		unknown unknown
264845_at	At1g03675	0.155073	0.879639	0.625219	0.691884	0.648312	0.63899		NS	NS	NS		10.8933	10.7651	10.8581	10.8575		putative thioredoxin-m similar to thioredoxin m-type precursor; similar to ESTs gb|T13714, gb|H76398, gb|N37762, gb|AA042639, gb|T21104, emb|Z30901; supported by cDNA: gi_6539607_gb_AF095749.1_AF095749
264831_at	At1g03687	0.424008	0.678249	0.946825	0.260199	0.0774613	0.162759		NS	NS	NS		4.59902	4.6324	4.60426	4.74111		hypothetical protein predicted by genscan
264842_at	At1g03700	0.0089354	0.93491	0.0129664	0.261956	0.517716	0.371187		NS	NS	NS		3.2334	3.41031	3.39905	3.27137		hypothetical protein predicted by genscan; supported by cDNA: gi_15028214_gb_AY045930.1_
264830_at	At1g03710	0.0699147	0.0441219	0.327785	0.662848	0.0143482	0.854371		NS	NS	NS		3.46972	3.62242	3.41101	3.62311		hypothetical protein predicted by genefinder
264825_at	At1g03720	0.807995	0.884085	0.739894	0.644347	0.426447	0.685017		NS	NS	NS		3.8779	3.84083	3.82705	4.00857		hypothetical protein predicted by genscan
264834_at	At1g03730	0.0338063	0.685378	0.106659	0.934731	0.721528	0.685853		NS	NS	NS		5.98228	5.75817	5.79861	6.01661		unknown protein similar to ESTs gb|AA605440 and gb|H37232;supported by full-length cDNA: Ceres:30716.
264841_at	At1g03740	0.0484544	0.308202	0.00226502	0.285296	0.00493772	0.300747		NS	NS	NS		5.92818	6.1152	6.25828	6.24645		putative protein kinase similar to (Z71703), cdc2-like protein kinase; similar to ESTs gb|T20748, gb|T20464, and emb|Z17761; supported by cDNA: gi_14532735_gi_13430451
265088_at	At1g03750	0.817395	0.350753	0.196582	0.27954	0.227018	0.823758		NS	NS	NS		3.54334	3.56094	3.69504	3.69801		hypothetical protein similar to DNA Helicases and DNA repair proteins
265087_at	At1g03760	0.925579	0.897926	0.858925	0.777756	0.945323	0.496033		NS	NS	NS		3.74702	3.73787	3.76587	3.73979		hypothetical protein predicted by genefinder
265086_at	At1g03770	0.447209	0.0773516	0.922327	0.842536	0.532414	0.806994		NS	NS	NS		3.00775	3.07248	2.99897	3.06763		hypothetical protein contains Zinc finger,C3HC4 type (RING finger), motif
265085_at	At1g03780	0.113449	0.357957	0.000235967	0.000584857	0.937179	0.315273		NS	0.000235967	NS		3.40804	3.31556	3.6462	3.40419		hypothetical protein predicted by genscan
265084_at	At1g03790	0.843225	0.358931	0.783207	0.401219	0.657338	0.633469		NS	NS	NS		3.45547	3.43407	3.47998	3.49486		hypothetical protein contains Cys3His zinc finger domain
265083_at	At1g03820	0.746616	0.631397	0.681876	0.257717	0.143112	0.752181		NS	NS	NS		4.57377	4.52751	4.53828	4.45216		hypothetical protein predicted by genefinder
265082_at	At1g03830	0.587631	0.968774	0.434104	0.421266	0.651076	0.810874		NS	NS	NS		3.85961	3.80664	3.75817	3.91177		hypothetical protein predicted by genefinder
265081_at	At1g03840	0.568909	0.866114	0.511126	0.812252	0.821317	0.185352		NS	NS	NS		3.538	3.57586	3.58011	3.52688		hypothetical protein contains Zinc finger,C2H2 type,domain
265067_at	At1g03850	0.00813525	0.296527	0.00325731	0.566741	0.00457407	0.882621		NS	NS	NS		3.83857	4.32266	4.23261	4.20818		hypothetical protein predicted by genefinder;supported by full-length cDNA: Ceres:271253.
265037_at	At1g03860	0.0231808	0.862386	0.0334334	0.831931	0.000391998	0.825066		NS	NS	0.000391998		7.89622	7.60214	7.56933	7.41063		putative prohibitin 2 B-cell receptor associated protein;supported by full-length cDNA: Ceres:6208.
265066_at	At1g03870	0.0067265	0.347882	0.0132621	0.881343	6.4815e-05	0.611622		NS	NS	6.4815e-05		8.5477	7.65291	7.79926	6.76191		unknown protein location of ESTs est VBVBD05, gb|Z30807 and VBVBD05 , gb|Z30808;supported by full-length cDNA: Ceres:39763.
265095_at	At1g03880	0.697915	0.59397	0.878467	0.535346	0.317555	0.162957		NS	NS	NS		3.2311	3.2657	3.24476	3.32392		putative cruciferin 12S seed storage protein identical to 12S seed storage protein, gi|808937
265094_at	At1g03890	0.220936	0.329725	0.449403	0.484911	0.190387	0.96577		NS	NS	NS		3.30064	3.38083	3.33988	3.42104		putative cruciferin 12S seed storage protein highly similar to Brassica napus cruciferin storage protein, gi|762919, arabidopsis 12S seed storage protein, gi|808937 and others. Location of ESTs YAY049-3 end, gb|Z26364 and YAY049-5 end, gb|Z26363
265043_at	At1g03900	0.112704	0.557879	0.353463	0.903159	0.0903685	0.828463		NS	NS	NS		7.90683	7.77317	7.83503	7.71971		Expressed protein ; supported by cDNA: gi_14596174_gb_AY042875.1_
265093_at	At1g03905	0.0955765	0.369464	0.00504026	0.870229	0.556867	0.104793		NS	NS	NS		3.53055	3.35262	3.29007	3.48103		unknown protein similar to NBD-like protein GB:AAD20643
265092_at	At1g03910	0.18581	0.495171	0.877686	0.820707	0.334007	0.447486		NS	NS	NS		7.22255	7.35105	7.20809	7.31182		hypothetical protein predicted by genscan
265038_at	At1g03920	0.331355	0.97352	0.814834	0.723581	0.21543	0.269691		NS	NS	NS		3.79407	3.91201	3.81919	3.92705		putative protein kinase highly similar to Mesembryanthemum crystallinum protein kinase, gi|457689 and Nicotiana tabacum protein kinase gi|506534;supported by full-length cDNA: Ceres:110932.
265045_s_at	At1g03930	0.98336	0.0342848	0.163978	0.112696	0.469842	0.632333		NS	NS	NS		5.51486	5.5173	5.67048	5.59474		putative protein kinase, ADK1 dual specificity kinase 1; Location of ESTs 184A2XP 3 , gb|AA651408 and est 184A2T7, gb|H37603. 99%+ identity with arabidopsis cDNA gb|U48779, alignment with this cDNA gives alternate splicing with eleventh exon becoming last exon and the last nucleotide
265044_at	At1g03950	0.12458	0.420655	0.0560072	0.367062	0.0229308	0.0719322		NS	NS	NS		5.81249	5.96151	5.96058	6.01986		hypothetical protein Similar to human BC-2 protein; Similar to human BC-2 protein, gi|2828147; supported by cDNA: gi_15529227_gb_AY052238.1_
265090_at	At1g03960	0.15249	0.687854	0.508809	0.656164	0.871098	0.765015		NS	NS	NS		3.97159	4.10328	4.02332	3.95855		putative protein phosphatase 2A Highly similar to protein phosphatase 2A regulatory subunit and human protein phosphatase 2A 72 kDa regulatory subunit, gi|190222
265040_at	At1g03970	0.000216334	0.386621	0.00892461	0.0407675	0.0053284	0.808233		0.000216334	NS	NS		5.32217	5.82771	5.72275	5.66638		G-box binding factor, GBF4 Identical to Arabidopsis thaliana G-box-binding factor 4, gb|U01823;supported by full-length cDNA: Ceres:36980.
265065_at	At1g03980	0.166284	0.766265	0.0164604	0.381346	0.0422588	0.260759		NS	NS	NS		3.46065	3.30894	3.22239	3.27803		putative phytochelatin synthase
265099_at	At1g03990	0.231429	0.780718	0.0164729	0.0501509	0.647728	0.510956		NS	NS	NS		3.92499	3.85431	3.76634	3.94711		unknown protein Location of EST 248L9T7, gb|AA713296
265039_at	At1g04000	0.0597319	0.739905	0.42271	0.0892805	0.53095	0.880175		NS	NS	NS		5.11136	4.88376	5.02844	5.0428		unknown protein Location of ESTs 203I24T7, gb|H76794 and 203I24XP, gb|AA605510;supported by full-length cDNA: Ceres:9756.
265098_at	At1g04010	0.960707	0.397509	0.560179	0.0830743	0.999905	0.453717		NS	NS	NS		4.42298	4.41725	4.36552	4.42296		unknown protein
265097_at	At1g04020	0.00838402	0.148017	0.0731792	0.339368	0.0267547	0.537616		NS	NS	NS		4.76026	4.18374	4.41925	4.36247		unknown protein
265096_at	At1g04030	0.456886	0.95702	0.235931	0.9463	0.31199	0.37535		NS	NS	NS		3.19332	3.12825	3.09219	3.09955		unknown protein Location of ESTs 40C3TT, gb|AA728590 and40C3T7, gb|T04573
265042_at	At1g04040	8.14629e-05	0.119938	4.30026e-05	0.820939	8.66913e-07	0.802682		8.14629e-05	4.30026e-05	8.66913e-07		9.43065	8.57833	8.43105	8.16921		unknown protein Similar to acid phosphatase; Location of ESTs 110C2T7 , gb|T42036, and 110C2XP, gb|AI100245; supported by cDNA: gi_13926197_gb_AF370572.1_AF370572
257404_at	At1g04050	0.597991	0.193458	0.0248368	0.183914	0.0235906	0.331324		NS	NS	NS		3.88157	3.82417	3.66598	3.62262		hypothetical protein predicted by genscan
265089_at	At1g04060	0.0819075	0.274581	0.0282765	0.166794	0.00299009	0.572622		NS	NS	NS		3.31328	3.14428	3.0845	3.17434		hypothetical protein similar to hypothetical protein GB:AAC16755
265041_at	At1g04070	0.592038	0.134939	0.0250037	0.0767701	0.765034	0.547368		NS	NS	NS		3.95219	3.90722	3.71109	3.92811		unknown protein Contains similarity to hypothetical mitochondrial import receptor subunit gb Z98597 from S. pombe. ESTs gb|T45575 and gb|Z26435 and gb|AA394576 come from this gene;supported by full-length cDNA: Ceres:23106.
265036_at	At1g04080	0.173881	0.926371	0.585807	0.870172	0.475824	0.338102		NS	NS	NS		6.81493	7.01015	6.88872	6.90455		unknown protein Contains similarity to pre-mRNA processing protein PRP39 gb L29224 from S. cerevisiae. ESTs gb|R64908 and gb|T88158, gb|N38703 and gb|AA651043 come from this gene;supported by full-length cDNA: Ceres:3916.
264320_at	At1g04090	0.525307	0.391838	0.485456	0.139907	0.877414	0.287443		NS	NS	NS		3.53527	3.5962	3.4696	3.55068		unknown protein
264328_at	At1g04100	0.0620244	0.947997	0.354689	0.749885	0.272139	0.795544		NS	NS	NS		4.52199	4.30509	4.40332	4.38622		putative IAA1 protein Match to IAA10 protein gb|U18412 from A. thaliana; supported by cDNA: gi_12083201_gb_AF332396.1_AF332396
264319_at	At1g04110	0.317642	0.936266	0.0506033	0.904881	0.0917714	0.303305		NS	NS	NS		3.22388	3.28374	3.38271	3.38989		subtilisin-like serine protease, putative contains similarity to subtilisin-like protease GI:3687307 from [Lycopersicon esculentum]
264330_at	At1g04120	0.341233	0.538833	0.808663	0.234416	0.0799379	0.381758		NS	NS	NS		5.29304	5.12937	5.26574	5.06449		multi-drug resistance protein Strong similarity to MRP-like ABC transporter gb|U92650 from A. thaliana and canalicular multi-drug resistance protein gb|L49379 from Rattus norvegicus; supported by cDNA: gi_10197657_gb_AF225908.1_AF225908
264331_at	At1g04130	0.0128351	0.367479	0.158643	0.623352	0.124616	0.290053		NS	NS	NS		3.8891	3.57886	3.71789	3.70118		hypothetical protein contains non-consensus donor splice site AT at exon 4 and acceptor splice site at exon5;Contains similarity to serine/threonine protein phosphatase gb|X83099 from S. cerevisiae; supported by cDNA: gi_15809805_gb_AY054170.1_
264329_at	At1g04140	0.740301	0.21027	0.841746	0.114035	0.304753	0.974073		NS	NS	NS		7.2784	7.30587	7.29419	7.36094		unknown protein Contains similarity to neural cell adhesion molecule 2, large isoform precursor gb|M76710 from Xenopus laevis, and beta transducin from S. cerevisiae gb|Q05946. ESTs gb|N65081 gb|Z30910, gb|Z34190, gb|Z34611, gb|R30101, gb|H36304, and gb|N65606 come from
264325_at	At1g04150	0.799734	0.417401	0.642405	0.482974	0.315165	0.351303		NS	NS	NS		3.84053	3.86336	3.79818	3.75817		putative phosphoribosylanthranilate transferase
264324_at	At1g04160	0.520487	0.699793	0.9663	0.398105	0.731165	0.2135		NS	NS	NS		3.6965	3.63433	3.69928	3.67013		myosin heavy chain MYA2 Strong similarity to myosin heavy chain gb|Z34293 from A. thaliana
264327_at	At1g04170	0.172267	0.322166	0.052945	0.731547	0.0311406	0.85222		NS	NS	NS		7.95676	7.80458	7.72738	7.71117		putative translation initiation factor eIF-2, gamma subunit similar to gb|U37354 from S. pombe. ESTs gb|T41979, gb|N37284 and gb|N37529 come from this gene;supported by full-length cDNA: Ceres:37699.
264323_at	At1g04180	0.786035	0.630225	0.981159	0.782836	0.173897	0.112882		NS	NS	NS		3.39514	3.37345	3.39283	3.48876		putative dimethylaniline monooxygenase
264322_at	At1g04190	0.0955131	0.917615	0.0108801	0.301754	0.0166173	0.187124		NS	NS	NS		6.38705	6.25822	6.13001	6.19663		unknown protein Contains similarity to tetratricopeptide repeat protein gb|U46571 from home sapiens. EST gb|Z47802 and gb|Z48402 come from this gene
264321_at	At1g04200	0.314142	0.434877	0.315401	0.88689	0.376579	0.990411		NS	NS	NS		4.75855	4.61705	4.90066	4.62126		unknown protein Contains similarity to gb|Z69902 from C. elegans
264318_at	At1g04220	0.217151	0.739977	0.338961	0.7622	0.256595	0.574719		NS	NS	NS		4.0946	3.85699	3.90008	3.90093		putative beta-ketoacyl-CoA synthase Strong similarity to beta-keto-Coa synthase gb|U37088 from Simmondsia chinensis
264326_at	At1g04230	0.249742	0.36667	0.160926	0.446595	0.655928	0.827308		NS	NS	NS		4.67998	4.78881	4.81979	4.74195		unknown protein
263656_at	At1g04240	0.000701099	0.304347	0.000368175	0.0747886	0.332957	0.322272		0.000701099	0.000368175	NS		6.67764	7.44102	7.30601	6.83412		putative auxin-induced protein AUX2-11 Match to Arabidopsis IAA3 (gb|U18406). EST gb|T04296 comes from this gene; supported by cDNA: gi_972910_gb_U18406.1_ATU18406
263664_at	At1g04250	0.0411144	0.836573	0.47971	0.963348	0.369949	0.552003		NS	NS	NS		6.29384	6.62567	6.42531	6.45089		putative auxin-induced protein, IAA17/AXR3-1 Identical to Arabidopsis gb|AF040632 and gb|U49073 IAA17/AXR3 gene. ESTs gb|H36782 and gb|F14074 come from this gene;supported by full-length cDNA: Ceres:33613.
263660_at	At1g04260	0.169862	0.239801	0.545585	0.874538	0.334015	0.435553		NS	NS	NS		5.63216	5.49162	5.70831	5.49071		unknown protein ESTs gb|N65789,gb|T04628 come from this gene;supported by full-length cDNA: Ceres:28606.
263667_at	At1g04270	0.786184	0.629181	0.75491	0.887423	0.899473	0.468677		NS	NS	NS		8.72089	8.68075	8.6665	8.70175		putative 40S ribosomal protein S15 Strong similarity to Oryza 40S ribosomal protein S15. ESTs gb|R29788,gb|ATTS0365 come from this gene; supported by cDNA: gi_15081657_gb_AY048221.1_
263661_at	At1g04290	0.0470494	0.157711	0.0898582	0.869614	0.832669	0.495068		NS	NS	NS		6.19996	5.94441	6.0783	6.22281		unknown protein EST gb|T45093 comes from this gene;supported by full-length cDNA: Ceres:8374.
263654_at	At1g04300	0.119565	0.779677	0.171735	0.982252	0.557995	0.902183		NS	NS	NS		5.47784	5.80646	5.75661	5.60387		unknown protein
263653_at	At1g04310	0.2857	0.0440397	0.0139843	0.798938	0.0243664	0.734912		NS	NS	NS		3.40978	3.51284	3.68271	3.72683		putative ethylene receptor (ERS2) EST gb|W43451 comes from this gene
263652_at	At1g04330	0.233733	0.208403	0.826213	0.339827	0.866344	0.1248		NS	NS	NS		3.54043	3.67072	3.52103	3.55381		unknown protein EST gb|H76414 comes from this gene
263651_at	At1g04340	0.481212	0.881963	0.153555	0.0178183	0.247903	0.426245		NS	NS	NS		6.45132	6.38758	6.36947	6.37159		unknown protein Similar to Nicotiana lesion-inducing ORF (gb|U66269)
263668_at	At1g04350	0.993109	0.20114	0.0470942	0.952122	0.898787	0.17774		NS	NS	NS		7.75711	7.75615	7.56778	7.74411		putative 1-aminocyclopropane-1-carboxylate oxidase Similar to Arabidopsis 2A6 (gb|X83096). EST gb|T76913 comes from this gene; supported by cDNA: gi_15292974_gb_AY050921.1_
263650_at	At1g04360	0.167937	0.0135628	0.646419	0.547601	0.632578	0.060527		NS	NS	NS		3.49317	3.60159	3.53076	3.52688		hypothetical protein predicted by genscan
263649_at	At1g04380	0.687068	0.632874	0.878997	0.999965	0.664087	0.804062		NS	NS	NS		3.19399	3.23305	3.20953	3.24105		putative 1-aminocyclopropane-1-carboxylate oxidase Strong similarity to Arabidopsis 2A6 (gb|X83096)
263648_at	At1g04390	0.887899	0.145368	0.866768	0.309914	0.830303	0.758847		NS	NS	NS		4.37376	4.35991	4.39355	4.40043		hypothetical protein predicted by genscan
263669_at	At1g04400	0.00133904	0.707226	0.00171967	0.53378	0.00854049	0.493391		0.00133904	NS	NS		9.06615	9.45443	9.38649	9.35108		putative cryptochrome 2 apoprotein Match to Arabidopsis photolysase (PHH1) gene (gb|X99061) and cryptochrome 2 apoprotein (CRY2) (gb|U43397). ESTs gb|W43661 and gb|Z25638 come from this gene; supported by cDNA: gi_1468974_gb_U62549.1_ATU62549
263663_at	At1g04410	0.400667	0.217179	0.187231	0.832576	0.88658	0.194175		NS	NS	NS		11.4925	11.4503	11.417	11.485		putative malate dehydrogenase similar to GB:AAB64290;supported by full-length cDNA: Ceres:40467.
263678_at	At1g04420	0.203258	0.55828	0.0574449	0.786718	0.124786	0.639897		NS	NS	NS		8.61323	8.48693	8.4037	8.47179		hypothetical protein Similar to Babesia aldo-keto reductase (gb|M93122
263662_at	At1g04430	0.000416524	0.450705	0.00281226	0.707464	5.11492e-05	0.562995		0.000416524	NS	5.11492e-05		9.00036	8.56418	8.60964	8.35417		ankyrin-like protein EST gb|ATTS0956 comes from this gene;supported by full-length cDNA: Ceres:108617.
263657_at	At1g04440	0.0407647	0.506294	0.140753	0.89114	0.0106605	0.927389		NS	NS	NS		6.55465	6.75436	6.6926	6.82369		putative casein kinase I similar to GB:CAA55395
263659_at	At1g04470	0.626101	0.301284	0.271712	0.262144	0.910289	0.929599		NS	NS	NS		3.15506	3.11463	3.06713	3.16542		unknown protein EST gb|ATTS5672 comes from this gene
263665_at	At1g04480	0.425557	0.954055	0.164211	0.939121	0.283474	0.425621		NS	NS	NS		8.1856	8.03172	7.93496	7.94923		putative putative 60S ribosomal protein L17 identical to GB:AAB80655; supported by full-length cDNA: Ceres: 4513.
263658_at	At1g04490	0.0407638	0.0768428	0.00358265	0.0233973	0.404327	0.401615		NS	NS	NS		3.0087	3.11848	2.88423	2.97113		unknown protein EST gb|T21788 comes from this gene
263655_at	At1g04500	0.80807	0.237707	0.584583	0.790842	0.351387	0.488415		NS	NS	NS		3.08788	3.10692	3.12729	3.01937		hypothetical protein predicted by genefinder
263666_at	At1g04510	0.0434116	0.0753771	0.0135184	0.905019	0.117584	0.107389		NS	NS	NS		6.65107	6.34537	6.4067	6.38466		putative pre-mRNA splicing factor PRP19 similar to GB:AAB80652; supported by cDNA: gi_14532631_gb_AY039940.1_
263677_at	At1g04520	0.066271	0.864946	0.1557	0.742017	0.071627	0.802907		NS	NS	NS		4.34304	3.98336	4.1285	4.06334		unknown protein
264609_at	At1g04530	0.573637	0.988008	0.228382	0.818928	0.310776	0.90171		NS	NS	NS		6.86562	6.94158	7.02943	6.98995		unknown protein ;supported by full-length cDNA: Ceres:2935.
264601_at	At1g04540	0.730122	0.260138	0.122529	0.228139	0.46309	0.834197		NS	NS	NS		3.85433	3.8249	3.71775	3.91881		hypothetical protein similar to hypothetical protein GB:AAB80650
264605_at	At1g04550	0.134871	0.881236	0.923431	0.180823	0.77648	0.132708		NS	NS	NS		4.71252	4.49417	4.72694	4.75232		putative auxin-induced protein, IAA12 similar to GB:S58498;supported by full-length cDNA: Ceres:40608.
264612_at	At1g04560	0.220307	0.967764	0.284765	0.80831	0.928731	0.109694		NS	NS	NS		3.56922	3.66754	3.47161	3.56187		unknown protein similar to GB:AAC37469; supported by cDNA: gi_15293292_gb_AY051080.1_
264614_s_at	At1g04580	0.489158	0.770304	0.408679	0.654832	0.718789	0.316043		NS	NS	NS		3.75684	3.65926	3.63368	3.70577		putative aldehyde oxidase similar to GB:BAA82672; supported by cDNA: gi_6759367_dbj_AB037271.1_AB037271
264615_at	At1g04590	0.359873	0.2129	0.430003	0.821118	0.811134	0.100677		NS	NS	NS		5.65136	5.76791	5.56103	5.62685		unknown protein ; supported by cDNA: gi_13430645_gb_AF360235.1_AF360235
264599_at	At1g04600	0.235857	0.242682	0.0512345	0.556495	0.264394	0.203896		NS	NS	NS		3.09984	3.17217	3.20291	3.14051		putative myosin heavy chain similar to GB:AAC04899
264598_at	At1g04610	0.412654	0.948098	0.585321	0.402146	0.912637	0.311606		NS	NS	NS		3.7886	3.87858	3.84609	3.77639		putative dimethylaniline monooxygenase similar to GB:AAC04900
264597_at	At1g04620	0.00288312	0.104238	0.0857362	0.544115	0.0253882	0.165083		NS	NS	NS		7.64059	7.21464	7.44889	7.41714		unknown protein
264596_at	At1g04630	0.686644	0.972892	0.957026	0.512679	0.596512	0.910736		NS	NS	NS		2.92123	2.89625	2.91836	2.88867		unknown protein similar to polygalacturonase GB:AAD25836
264613_at	At1g04640	0.0735455	0.239131	0.497949	0.16292	0.0685089	0.824829		NS	NS	NS		8.17051	8.03109	8.11706	8.0286		lipoyltransferase identical to GB:BAA78386; supported by cDNA: gi_4996285_dbj_AB020975.1_AB020975
264610_at	At1g04645	0.00534847	0.136666	0.360725	0.929889	0.438529	0.838619		NS	NS	NS		3.03292	3.16562	3.09928	3.00448		Expressed protein ; supported by full-length cDNA: Ceres: 2265.
264604_at	At1g04650	0.818839	0.568166	0.453926	0.715473	0.238441	0.0482432		NS	NS	NS		3.37837	3.3928	3.42879	3.4572		hypothetical protein predicted by genscan
264606_at	At1g04660	0.636333	0.210529	0.339854	0.29373	0.0813726	0.119093		NS	NS	NS		4.58391	4.64112	4.7016	4.8684		unknown protein ;supported by full-length cDNA: Ceres:98340.
264603_at	At1g04670	0.0775073	0.96162	0.491013	0.156908	0.0588977	0.809245		NS	NS	NS		3.21769	3.31706	3.17743	3.1405		hypothetical protein predicted by genscan
264611_at	At1g04680	0.0550104	0.856316	0.245497	0.979426	0.075756	0.708239		NS	NS	NS		7.91626	7.58494	7.68966	7.52814		putative pectate lyase A11 similar to GB:CAB36835;supported by full-length cDNA: Ceres:37952.
264607_at	At1g04690	0.837326	0.347534	0.324495	0.673806	0.0762582	0.92199		NS	NS	NS		9.00844	9.02233	9.06461	9.13161		putative K+ channel, beta subunit similar to GB:AAA87294;supported by full-length cDNA: Ceres:23300.
264602_at	At1g04700	0.923576	0.91724	0.942603	0.536995	0.352754	0.00750861		NS	NS	NS		3.56507	3.57204	3.5698	3.64261		putative Ser/Thr protein kinase similar to GB:AAC12844
264608_at	At1g04710	0.000457879	0.461523	0.0417592	0.421251	0.055645	0.209192		0.000457879	NS	NS		6.52139	5.98944	6.21858	6.28244		putative acetyl-CoA acyltransferase Strong similarity to Cucumis acetyl-CoA acyltransferase (gb|D70895);supported by full-length cDNA: Ceres:125847.
264600_at	At1g04730	0.177574	0.194591	0.749442	0.295489	0.924303	0.908786		NS	NS	NS		3.68274	3.51643	3.72139	3.69433		hypothetical protein predicted by genscan
264595_at	At1g04750	0.000562728	0.0660654	0.191681	0.218108	0.0254527	0.577204		0.000562728	NS	NS		8.17091	7.95724	8.11761	7.98761		putative vesicle-associated membrane protein, synaptobrevin 7B Strong similarity to Arabidopsis ATHSAR1 (gb|M90418). ESTs gb|T44122,gb|N65276,gb|AA041135 come from this gene
261178_at	At1g04760	0.0639432	0.135334	0.673662	0.915908	0.149165	0.160761		NS	NS	NS		3.47096	3.32686	3.43229	3.3731		synaptobrevin 7B, putative similar to GB: from [Arabidopsis thaliana]
261177_at	At1g04770	0.892041	0.892595	0.871222	0.347699	0.0106776	0.510767		NS	NS	NS		6.18961	6.16494	6.14424	5.45438		hypothetical protein predicted by genemark.hmm
261176_at	At1g04780	0.193782	0.0956873	0.165746	0.88478	0.441345	0.801899		NS	NS	NS		5.81652	5.91064	5.92705	5.89376		hypothetical protein predicted by genemark.hmm
261127_at	At1g04790	0.611596	0.908916	0.864386	0.382557	0.314614	0.594146		NS	NS	NS		4.67947	4.73541	4.70271	4.78362		unknown protein ; supported by cDNA: gi_15450835_gb_AY054498.1_
261175_at	At1g04800	0.978434	0.443223	0.0376674	0.527391	0.53039	0.79284		NS	NS	NS		5.61133	5.61796	6.09777	5.80149		unknown protein
261174_at	At1g04810	0.549137	0.667894	0.20905	0.934461	0.112475	0.400149		NS	NS	NS		6.20851	6.26441	6.3234	6.36683		26S proteasome regulatory subunit, putative similar to GB:AAC04490 from [Arabidopsis thaliana]
261129_at	At1g04820	9.2868e-05	0.528157	0.000829575	0.692757	0.00010086	0.832747		9.2868e-05	0.000829575	0.00010086		8.55478	7.98645	8.19052	8.13446		tubulin alpha-2/alpha-4 chain identical to SP:P29510 from [Arabidopsis thaliana]; supported by cDNA: gi_16648843_gb_AY058199.1_
261173_at	At1g04830	0.176876	0.821415	0.0841588	0.760848	0.0845674	0.703527		NS	NS	NS		5.42941	5.63953	5.6571	5.72145		hypothetical protein predicted by genemark.hmm
261172_at	At1g04840	0.391774	0.105894	0.754417	0.658628	0.541525	0.521905		NS	NS	NS		3.20606	3.26032	3.23191	3.24442		hypothetical protein predicted by genemark.hmm
261153_at	At1g04850	0.0932967	0.188597	0.29473	0.814504	0.43961	0.606372		NS	NS	NS		6.49546	6.27979	6.3702	6.40651		unknown protein ;supported by full-length cDNA: Ceres:6672.
261128_at	At1g04860	0.786455	0.129473	0.363538	0.93165	0.193981	0.336303		NS	NS	NS		5.66803	5.6374	5.54798	5.48013		ubiquitin-specific protease 2 (UBP2) identical to GI:11993463; supported by cDNA: gi_11993462_gb_AF302659.1_AF302659
261130_at	At1g04870	0.248006	0.0937362	0.0113008	0.902299	0.278111	0.420175		NS	NS	NS		6.5407	6.45444	6.34209	6.43157		unknown protein ; supported by cDNA: gi_16930706_gb_AF436837.1_AF436837
261171_at	At1g04880	0.521616	0.712866	0.0870048	0.989502	0.996663	0.575872		NS	NS	NS		3.36374	3.31412	3.24758	3.36335		unknown protein
261124_at	At1g04900	0.00016588	0.447082	0.000350993	0.453324	0.00394757	0.348554		0.00016588	0.000350993	NS		3.8398	3.40605	3.41111	3.54831		hypothetical protein predicted by genemark.hmm;supported by full-length cDNA: Ceres:98874.
261170_at	At1g04910	0.0523856	0.905831	0.0338296	0.293104	0.199387	0.6381		NS	NS	NS		6.48416	6.2469	6.24493	6.30991		growth regulator protein similar to GB:X80301 from [Nicotiana tabacum]
261169_at	At1g04920	0.117161	0.0549492	0.314011	0.748549	0.121748	0.561349		NS	NS	NS		3.91978	4.00352	3.98215	4.06625		sucrose-phosphate synthase, putative similar to GB:Y11795 from [Craterostigma plantagineum]
261152_at	At1g04930	0.388992	0.81898	0.128766	0.752021	0.796165	0.768852		NS	NS	NS		4.34573	4.22375	4.16989	4.31704		hypothetical protein predicted by genemark.hmm;supported by full-length cDNA: Ceres:154031.
261168_at	At1g04940	0.0260358	0.921321	0.262015	0.828411	0.11981	0.867912		NS	NS	NS		4.40514	4.1157	4.2304	4.2153		unknown protein
261126_at	At1g04950	0.904726	0.432984	0.471678	0.571891	0.592521	0.0962299		NS	NS	NS		4.98403	4.96925	5.08107	4.92599		TATA binding protein-associated factor, putative similar to GB:CAA74021 from [Arabidopsis thaliana]; supported by cDNA: gi_15293056_gb_AY050962.1_
261155_at	At1g04960	0.42226	0.0509517	0.284903	0.258975	0.463555	0.621079		NS	NS	NS		6.11067	6.02629	6.04237	6.04231		unknown protein ;supported by full-length cDNA: Ceres:39874.
261154_at	At1g04970	0.0215071	0.321693	0.02765	0.903471	0.015827	0.849791		NS	NS	NS		6.34591	6.69644	6.67867	6.71788		unknown protein ;supported by full-length cDNA: Ceres:3807.
261167_at	At1g04980	0.0175208	0.436112	0.661568	0.548863	0.0490688	0.892218		NS	NS	NS		4.58396	4.14889	4.50507	4.19362		disulfide isomerase-related protein, putative similar to GB:AAB50217 from [Homo sapiens]
261179_at	At1g04985	0.105605	0.0738719	0.704674	0.655081	0.0628955	0.21094		NS	NS	NS		6.61139	6.71615	6.58715	6.75516		unknown protein
261125_at	At1g04990	0.255011	0.89679	0.0360743	0.743109	0.00371445	0.0243766		NS	NS	NS		5.86301	5.98978	6.03329	6.09914		zinc finger protein 2, putative similar to GB:AAD33770 from [Arabidopsis thaliana]; supported by cDNA: gi_15081720_gb_AY048253.1_
265214_at	At1g05000	0.902106	0.275492	0.834339	0.00334617	0.394737	0.611918		NS	NS	NS		3.75976	3.75126	3.77162	3.8114		unkown protein ESTs gb|H36249, gb|AA59732 and gb|AA651219 come from this gene
265194_at	At1g05010	0.0122226	0.615374	0.0620807	0.818064	0.00940189	0.457714		NS	NS	NS		10.213	9.5572	9.82954	9.68458		1-aminocyclopropane-1-carboxylate oxidase Identical to 1-aminocyclopropane-1-carboxylate oxidase (ACC oxidase) gb|X66719 (EAT1). ESTs gb|T43073, gb|T5714, gb|R90435, gb|R44023, gb|AA597926, gb|AI099676, gb|AA650810 and gb|29725 come from this gene
265213_at	At1g05020	0.839018	0.397214	0.0390876	0.754328	0.407039	0.737936		NS	NS	NS		3.67265	3.65963	3.43641	3.61137		clathrin protein family Similar to clathrin assembly protein gb|X68878 (AP180) from Rattus norvegicus. EST gb|W43552 comes from this gene
265212_at	At1g05030	0.910259	0.443701	0.329247	0.757688	0.108598	0.0854818		NS	NS	NS		6.09866	6.11195	6.20019	6.22338		putative sugar transporter protein Similar to gb|U43629 integral membrane protein from Beta vulgaris and a member of sugar transporter family PF|00083
265215_at	At1g05040	0.151715	0.838111	0.396479	0.691414	0.380626	0.713008		NS	NS	NS		3.45483	3.32296	3.39076	3.38611		hypothetical protein predicted by genscan
265218_at	At1g05050	0.319016	0.834122	0.93441	0.217964	0.479823	0.117387		NS	NS	NS		5.54937	5.4606	5.55987	5.61384		putative transcription factor
265192_at	At1g05060	0.62188	0.172078	0.126089	0.0212191	0.0592618	0.519616		NS	NS	NS		5.63869	5.6162	5.73786	5.73689		hypothetical protein predicted by genscan;supported by full-length cDNA: Ceres:37455.
265193_at	At1g05070	0.624996	0.060266	0.925033	0.67848	0.0361054	0.784425		NS	NS	NS		6.1787	6.15178	6.16931	6.37233		unknown protein ESTs gb|T144077 and gb|T43352 come from this gene; supported by full-length cDNA: Ceres: 13725.
265217_s_at	At1g05090	0.311196	0.0666904	0.288023	0.0729303	0.18681	0.299806		NS	NS	NS		4.89073	4.82948	4.80034	4.81834		unknown protein ESTs gb|H76594 and gb|H76252 come from this gene
265216_at	At1g05100	0.460161	0.257339	0.3969	0.993724	0.98241	0.483489		NS	NS	NS		3.80914	3.89432	3.71565	3.80671		putative NPK1-related MAP kinase similar to GB:BAA21855 from [Arabidopsis thaliana]
265191_at	At1g05120	0.148431	0.936318	0.787483	0.738818	0.894843	0.158391		NS	NS	NS		4.41934	4.50035	4.38831	4.41022		hypothetical protein Similar to Saccharomyces RAD16 (gb|X78993); The coding region for this hypothetical protein may extend beyond the end of the yUP8H12 sequence
264569_at	At1g05130	0.410645	0.536958	0.492039	0.193719	0.155495	0.53281		NS	NS	NS		3.0564	3.12403	3.10293	3.17654		unknown protein EST gb|ATTS1136 comes from this gene
264584_at	At1g05140	0.86212	0.0120997	0.715022	0.694983	0.301732	0.731653		NS	NS	NS		8.14788	8.13698	8.09777	8.08193		unknown protein Similar to Synechocystis hypothetical protein (gb|D90908); supported by cDNA: gi_15010609_gb_AY045606.1_
264568_at	At1g05150	0.40237	0.950055	0.132765	0.840339	0.711901	0.276401		NS	NS	NS		5.62515	5.77058	5.86299	5.56253		putative O-GlcNAc transferase similar to Rattus O-GlcNAc transferase (gb|U76557)
264586_at	At1g05160	0.608767	0.0344836	0.648636	0.944082	0.550006	0.796051		NS	NS	NS		4.87024	4.8176	4.82059	4.94876		putative cytochrome P450 Similar to GB:AAC69934; supported by cDNA: gi_13021852_gb_AF318500.1_AF318500
264583_at	At1g05170	0.875606	0.49138	0.0115398	0.111174	0.00374323	0.608863		NS	NS	NS		4.69047	4.70294	4.95344	5.01364		putative AVR9 elicitor response protein similar to GB:AAC69935; supported by cDNA: gi_14488077_gb_AF389287.1_AF389287
264585_at	At1g05180	0.287815	0.848976	0.454634	0.186249	0.295424	0.694274		NS	NS	NS		6.86954	6.73412	6.76882	6.70785		auxin-resistance protein AXR1 E1 ubiquitin-like activating enzyme; identical to GB:P42744; supported by cDNA: gi_15215701_gb_AY050379.1_
264575_at	At1g05190	0.758011	0.251385	0.461282	0.292177	0.270914	0.872112		NS	NS	NS		9.68018	9.65353	9.62499	9.55951		putative chloroplast 50S ribosomal protein, L6 Similar to Mycobacterium RlpF (gb|Z84395). ESTs gb|T75785,gb|R30580,gb|T04698 come from this gene;supported by full-length cDNA: Ceres:1730.
264587_at	At1g05200	0.0174816	0.677229	0.0238551	0.685864	0.0109638	0.720681		NS	NS	NS		5.20314	5.73973	5.63348	5.72385		putative ligand-gated ion channel protein Similar to Arabidopsis putative ion-channel PID:g2262157 (gb|AC002329); supported by cDNA: gi_5713180_gb_AF167355.1_AF167355
264579_at	At1g05205	0.332771	0.366287	0.405179	0.655722	0.328976	0.0648058		NS	NS	NS		5.98761	5.87937	6.0583	6.07073		Expressed protein ; supported by full-length cDNA: Ceres: 108558.
264581_at	At1g05210	0.00611095	0.475876	0.0283448	0.810473	0.00893598	0.339172		NS	NS	NS		5.29838	4.53906	4.91412	4.82084		hypothetical protein predicted by genefinder; supported by full-length cDNA: Ceres: 29808.
264582_at	At1g05230	0.280767	0.289094	0.626197	0.18861	0.948956	0.388646		NS	NS	NS		5.2445	5.37089	5.18876	5.25428		putative ovule-specific homeotic protein Strong similarity to Phalaenopsis homeobox protein (gb|U34743); supported by cDNA: gi_14334995_gb_AY037177.1_
264567_s_at	At1g05250	0.15672	0.174265	0.825038	0.721561	0.648681	0.428516		NS	NS	NS		3.54351	3.67365	3.56317	3.58216		putative peroxidase ATP12a Strong similarity to Arabidopsis peroxidase ATP11A (gb|X98802)
264577_at	At1g05260	0.537558	0.00965993	0.229594	0.630576	0.872126	0.0631435		NS	NS	NS		3.45357	3.49794	3.34057	3.44319		putative peroxidase Strong similarity to Arabidopsis peroxidase ATPEROX7A (gb|X98321);supported by full-length cDNA: Ceres:114862.
264566_at	At1g05270	0.515706	0.742622	0.875377	0.529676	0.612419	0.088633		NS	NS	NS		5.13716	5.23256	5.12135	5.19116		hypothetical protein predicted by genefinder
264565_at	At1g05280	0.880033	0.420936	0.737682	0.379202	0.328593	0.4405		NS	NS	NS		3.06305	3.07256	3.0907	3.00008		hypothetical protein Similar to hypothetical protein PID|e327464 (gb|Z97338)
264564_at	At1g05290	0.297845	0.872897	0.405673	0.0545107	0.98053	0.391957		NS	NS	NS		2.84208	2.78787	2.87923	2.84076		hypothetical protein predicted by genscan
264574_at	At1g05300	0.47223	0.991796	0.62086	0.0614963	0.657435	0.609729		NS	NS	NS		4.69868	4.75766	4.63286	4.76082		putative zinc transporter Similar to Arabidopsis Fe(II) transport protein (gb|U27590)
264573_at	At1g05310	0.012649	0.355285	0.0395582	0.676149	0.00693781	0.510867		NS	NS	NS		4.16756	4.71869	4.3846	4.44239		putative pectin methylesterase Similar to Prunus pectinesterase (gb|X95991)
264572_at	At1g05320	0.00119844	0.0612588	0.0512744	0.579611	0.00824768	0.597811		0.00119844	NS	NS		4.80178	5.40202	5.34586	5.2493		unknown protein ESTs gb|AA042402,gb|ATTS1380 come from this gene
264571_at	At1g05330	0.0415619	0.0126225	0.179519	0.941891	0.916921	0.0940878		NS	NS	NS		3.11943	3.22727	3.18841	3.11333		hypothetical protein predicted by genefinder
264580_at	At1g05340	0.4995	0.867969	0.675291	0.686597	0.436143	0.913488		NS	NS	NS		3.34837	3.24425	3.41985	3.21909		unknown protein EST gb|ATTS0295 comes from this gene;supported by full-length cDNA: Ceres:20380.
264570_at	At1g05350	0.187966	0.591736	0.39503	0.767593	0.0813049	0.827429		NS	NS	NS		5.62273	5.49268	5.54465	5.40208		unknown protein Similar to Caenorhabditis unknown protein T03F1.1 (gb|U88169
264576_at	At1g05360	0.159993	0.0190745	0.437453	0.305208	0.279926	0.114761		NS	NS	NS		4.52717	4.63627	4.59451	4.61318		unknown protein Similar to Arabidopsis hypothetical protein PID:e326839 (gb|Z97337;supported by full-length cDNA: Ceres:107636.
264578_at	At1g05370	0.326178	0.0176247	0.390577	0.0959531	0.826682	0.212776		NS	NS	NS		3.7868	3.72333	3.84318	3.77087		hypothetical protein predicted by genemark.hmm
261383_at	At1g05380	0.114049	0.776594	0.177821	0.982933	0.431646	0.0342564		NS	NS	NS		5.628	5.54273	5.44669	5.56799		hypothetical protein predicted by genemark.hmm
261388_at	At1g05385	0.914099	0.24244	0.467752	0.772853	0.38422	0.0899545		NS	NS	NS		6.64768	6.65595	6.55688	6.72689		Expressed protein ; supported by cDNA: gi_13877958_gb_AF370242.1_AF370242
261380_at	At1g05400	0.472895	0.267998	0.680745	0.626813	0.836798	0.068699		NS	NS	NS		4.1343	4.18944	4.10476	4.1494		hypothetical protein predicted by genemark.hmm
261387_at	At1g05410	0.62933	0.933748	0.451553	0.421707	0.529373	0.923346		NS	NS	NS		3.88577	3.82787	3.79896	3.82583		hypothetical protein predicted by genemark.hmm;supported by full-length cDNA: Ceres:38810.
261386_at	At1g05430	0.916323	0.0119079	0.475873	0.663138	0.229307	0.82466		NS	NS	NS		6.06273	6.07301	6.12592	6.1713		unknown protein ;supported by full-length cDNA: Ceres:27918.
261384_at	At1g05440	0.227296	0.289137	0.422062	0.188078	0.182276	0.0762683		NS	NS	NS		3.07607	3.13185	3.04131	3.2081		hypothetical protein predicted by genemark.hmm
261385_at	At1g05450	0.944183	0.336842	0.513234	0.346097	0.854623	0.980626		NS	NS	NS		3.14488	3.13901	3.0949	3.13055		lipid-transfer protein, putative similar to lipid-transfer protein GI:6782436 from [Nicotiana glauca];supported by full-length cDNA: Ceres:32438.
261381_at	At1g05460	0.272661	0.864304	0.827857	0.761647	0.185541	0.507526		NS	NS	NS		4.14537	4.35057	4.17611	4.33881		hypothetical protein predicted by genemark.hmm
261382_at	At1g05470	0.200922	0.134032	0.270824	0.629731	0.311248	0.139299		NS	NS	NS		3.20186	3.29302	3.29217	3.27476		hypothetical protein contains similarity to synaptojanin 2 isoform beta GI:3241985 from [Mus musculus]
263204_at	At1g05480	0.753362	0.692939	0.757682	0.712184	0.681698	0.545436		NS	NS	NS		3.17286	3.19659	3.20051	3.13574		hypothetical protein contains similarity to zinc finger helicase GI:2306766 from (Homo sapiens)
263203_at	At1g05490	0.801036	0.634634	0.619553	0.910355	0.783674	0.445187		NS	NS	NS		3.07234	3.09056	3.11931	3.09299		hypothetical protein predicted by genemark.hmm
263205_at	At1g05500	0.0485044	0.170476	0.0208161	0.352484	0.246384	0.606184		NS	NS	NS		5.93447	6.12351	6.02989	5.9871		Ca2+-dependent lipid-binding protein, putative similar to Ca2+-dependent lipid-binding protein (CLB1) GI:2789434 from (Lycopersicon esculentum)
263175_at	At1g05510	0.425129	0.388794	0.784806	0.678816	0.0139815	0.0942254		NS	NS	NS		3.66128	3.73194	3.68123	3.49034		hypothetical protein similar to unknown protein GI:4105683 from (Oryza sativa)
263185_at	At1g05520	0.0237106	0.405972	0.047949	0.488841	0.225107	0.0282338		NS	NS	NS		6.1036	5.839	5.92118	5.97038		transport protein, putative similar to transport protein GI:7268121 from (Arabidopsis thaliana); supported by cDNA: gi_15912296_gb_AY056426.1_
263176_at	At1g05530	0.10986	0.154994	0.100346	0.818734	0.675992	0.361683		NS	NS	NS		3.33622	3.45426	3.2309	3.36566		UDP-glucose:indole-3-acetate beta-D-glucosyltransferase, putative similar to UDP-glucose:indole-3-acetate beta-D-glucosyltransferase GI:2149127 from (Arabidopsis thaliana)
263177_at	At1g05540	0.00761402	0.698243	0.389298	0.211956	0.160291	0.579391		NS	NS	NS		4.92476	4.45458	4.7877	4.72035		hypothetical protein predicted by genemark.hmm
263178_at	At1g05550	0.586613	0.450147	0.56789	0.697642	0.782459	0.31302		NS	NS	NS		3.52324	3.58544	3.56356	3.54084		hypothetical protein predicted by genemark.hmm
263184_at	At1g05560	0.861681	0.291281	0.486937	0.156691	0.122955	0.284181		NS	NS	NS		5.0407	5.00154	5.13719	4.84935		UDP-glucose:indole-3-acetate beta-D-glucosyltransferase, putative similar to UDP-glucose:indole-3-acetate beta-D-glucosyltransferase GI:2149127 from (Arabidopsis thaliana); supported by cDNA: gi_13661274_gb_AF196777.1_AF196777
263183_at	At1g05570	0.321676	0.720793	0.11305	0.414051	0.365349	0.344914		NS	NS	NS		5.57184	5.81053	5.96846	5.79265		putative glucan synthase Highly similar to putative glucan synthase GB:AAD15408; supported by cDNA: gi_13649387_gb_AF237733.1_AF237733
263182_at	At1g05575	0.00134515	0.00628886	0.000463379	0.0894667	0.000486403	0.0102549		0.00134515	0.000463379	0.000486403		3.27352	3.55889	3.70218	3.49336		Expressed protein ; supported by full-length cDNA: Ceres: 27081.
263233_at	At1g05580	0.52484	0.634192	0.55695	0.470447	0.159051	0.847483		NS	NS	NS		3.07511	3.13732	3.11473	2.98455		hypothetical protein similar to Na/H antiporter proteins; N-terminal half of protein is similar to Na/H antiporter proteins
263199_at	At1g05590	0.509538	0.395778	0.62067	0.513481	0.789126	0.779668		NS	NS	NS		4.81772	4.75609	4.7516	4.84461		hypothetical protein Similar to hexosaminidase, gi|1170249, gi|1076942 and others
263200_at	At1g05600	0.463483	0.867527	0.614328	0.5151	0.911395	0.92272		NS	NS	NS		4.59352	4.72639	4.50178	4.57103		hypothetical protein predicted by genscan
263201_at	At1g05610	0.624932	0.764204	0.827276	0.58807	0.560359	0.835262		NS	NS	NS		3.55206	3.61313	3.52743	3.62054		putative ADP-glucose pyrophosphorylase, small subunit precursor similar to GB:P52416 from [Vicia faba]
263180_at	At1g05620	0.274921	0.689532	0.690408	0.955747	0.223697	0.602356		NS	NS	NS		5.6119	5.45197	5.55644	5.44		unknown protein ;supported by full-length cDNA: Ceres:39571.
263202_at	At1g05630	0.156191	0.527561	0.910976	0.564108	0.168995	0.970862		NS	NS	NS		4.74415	4.16018	4.71328	4.30013		putative inositol 1,4,5-trisphosphate 5-phosphatase Highly similar to arabidopsis inositol 1,4,5-trisphosphate 5-phosphatase, gi|4688596
263229_s_at	At1g05650	0.231863	0.354908	0.294237	0.682661	0.0636851	0.039013		NS	NS	NS		2.86569	2.93807	2.93878	2.98475		putative polygalacturonase similar to GB:AAC23398
263230_at	At1g05670	0.488532	0.793055	0.410444	0.177808	0.42458	0.25563		NS	NS	NS		3.21418	3.14491	3.27486	3.16028		putative indole-3-acetate beta-glucosyltransferase similar to indole-3-acetate beta-glucosyltransferase GB:AAD32293
263231_at	At1g05680	0.227247	0.364634	0.607099	0.799209	0.461401	0.591121		NS	NS	NS		3.21041	3.35974	3.26278	3.27421		putative indole-3-acetate beta-glucosyltransferase similar to indole-3-acetate beta-glucosyltransferase GB:AAD32293
257451_at	At1g05690	0.760532	0.488036	0.497745	0.0880987	0.4114	0.704884		NS	NS	NS		3.93808	3.96616	4.02659	3.83285		hypothetical protein predicted by genefinder
263232_at	At1g05700	0.971629	0.860994	0.0277	0.0111542	0.300356	0.265909		NS	NS	NS		3.10763	3.10508	3.28861	3.1894		putative light repressible receptor protein kinase Very Similar to light repressible receptor protein kinase, gi|2129635
263179_at	At1g05710	0.0779114	0.707418	0.0120077	0.241312	0.00559234	0.803567		NS	NS	NS		3.82221	3.51926	3.35553	3.32888		unknown protein similar to unknown protein GB:AAD24850;supported by full-length cDNA: Ceres:3900.
263181_at	At1g05720	0.0460595	0.943298	0.256164	0.624128	0.00914669	0.0943822		NS	NS	NS		7.16618	6.92	7.05319	6.84147		unknown protein ;supported by full-length cDNA: Ceres:27596.
257452_at	At1g05740	0.108691	0.662333	0.0650075	0.121992	0.812248	0.171921		NS	NS	NS		3.50455	3.66779	3.65485	3.4906		hypothetical protein predicted by genscan
261310_at	At1g05750	0.31974	0.419742	0.561141	0.122524	0.0681302	0.193302		NS	NS	NS		4.00665	3.91821	3.94554	3.83104		hypothetical protein predicted by genemark.hmm
261256_at	At1g05760	0.135023	0.41309	0.00347659	0.315455	0.0165037	0.651478		NS	NS	NS		4.14975	4.33166	4.59484	4.42344		disease resistance protein RTM1 identical to GB:AAF14583 from [Arabidopsis thaliana] (Proc. Natl. Acad. Sci. U.S.A. 97 (1), 489-494 (2000)); supported by cDNA: gi_13877528_gb_AF370465.1_AF370465
261311_at	At1g05770	0.0110096	0.206595	0.950524	0.252816	0.166122	0.0319625		NS	NS	NS		3.36178	3.17532	3.35813	3.27913		disease resistance protein RTM1, putative similar to GB:AAF14583 from [Arabidopsis thaliana] (Proc. Natl. Acad. Sci. U.S.A. 97 (1), 489-494 (2000))
261312_at	At1g05790	0.06396	0.198875	0.0647848	0.217236	0.493968	0.461935		NS	NS	NS		5.41696	5.62648	5.69715	5.51607		putative NPK1-related protein kinase 2 predicted by genemark.hmm
261278_at	At1g05800	0.715536	0.579407	0.00699978	0.837953	0.34523	0.258863		NS	NS	NS		3.3827	3.3461	3.2279	3.31926		hypothetical protein predicted by genemark.hmm
261254_at	At1g05805	0.0021813	0.580354	0.00495074	0.55988	0.00563267	0.825221		0.0021813	NS	NS		6.13113	6.79724	6.61926	6.63469		Expressed protein ; supported by full-length cDNA: Ceres: 21406.
261252_at	At1g05810	0.235409	0.388593	0.193973	0.327945	0.848552	0.841965		NS	NS	NS		4.58402	4.84368	4.7837	4.55169		RAS-related protein ARA-1 identical to SP:P19892 from [Arabidopsis thaliana] (Gene 76:313-319(1989))
261253_at	At1g05840	0.585333	0.802114	0.523859	0.899782	0.92147	0.985438		NS	NS	NS		5.4336	5.3334	5.55496	5.4529		unknown protein ;supported by full-length cDNA: Ceres:158528.
261279_at	At1g05850	0.801649	0.941853	0.658424	0.244526	0.533656	0.491622		NS	NS	NS		11.1811	11.1959	11.153	11.1424		class I chitinase, putative similar to GB:AAF69774 from [Arabidopsis blepharophylla] (Proc. Natl. Acad. Sci. U.S.A. 97 (10), 5322-5327 (2000))
261280_at	At1g05860	0.0366522	0.909688	0.797245	0.944755	0.453165	0.733311		NS	NS	NS		3.75572	4.05379	3.71547	3.85182		hypothetical protein predicted by genemark.hmm
261249_at	At1g05880	0.0967346	0.591319	0.629213	0.95712	0.00793127	0.127539		NS	NS	NS		3.77027	3.89227	3.80338	3.96855		hypothetical protein predicted by genemark.hmm
261250_at	At1g05890	0.0841993	0.501306	0.00314564	0.942528	0.00699848	0.0031717		NS	NS	NS		4.74656	4.95878	5.13158	5.0435		unknown protein
261255_at	At1g05900	0.561496	0.646582	0.43048	0.0464528	0.354408	0.0694982		NS	NS	NS		4.75266	4.69139	4.67409	4.84231		hypothetical protein contains similarity to endonuclease III; supported by cDNA: gi_15294153_gb_AF410268.1_AF410268
261257_at	At1g05910	0.366903	0.423284	0.277457	0.36002	0.0493081	0.727272		NS	NS	NS		5.29046	5.19068	5.16151	4.98495		tat-binding protein, putative similar to GB:CAA56963 from [Saccharomyces cerevisiae]; supported by cDNA: gi_15983758_gb_AY056785.1_
261251_at	At1g05920	0.391683	0.00758477	0.893869	0.37562	0.0763287	0.0191577		NS	NS	NS		3.64039	3.68319	3.63316	3.77513		hypothetical protein predicted by genemark.hmm
260927_at	At1g05940	0.3612	0.961337	0.369471	0.537425	0.815353	0.408688		NS	NS	NS		6.58508	6.47873	6.47399	6.62581		hypothetical protein predicted by genemark.hmm; supported by cDNA: gi_13430817_gb_AF360321.1_AF360321
260945_at	At1g05950	0.0579846	0.346242	0.781783	0.136782	0.627334	0.463658		NS	NS	NS		3.46187	3.3064	3.48668	3.4171		hypothetical protein predicted by genemark.hmm
260961_at	At1g05960	0.0799477	0.319842	0.573081	0.538382	0.0108591	0.802176		NS	NS	NS		5.88183	5.68859	5.82164	5.60227		unknown protein similar to hypothetical protein GB:AAF80120 GI:8810459 from [Arabidopsis thaliana ]; supported by cDNA: gi_14194168_gb_AF367291.1_AF367291
260960_at	At1g05990	0.442616	0.0804296	0.475121	0.985098	0.914322	0.138928		NS	NS	NS		3.67774	3.7458	3.59893	3.68799		calcium-binding protein, putative similar to calcium-binding protein GB:CAB63264 GI:6580549 from [Lotus japonicus]; supported by cDNA: gi_12083339_gb_AF332466.1_AF332466
260955_at	At1g06000	0.00778575	0.915518	0.0463327	0.826151	0.00238068	0.72914		NS	NS	0.00238068		4.74953	3.95517	4.23795	3.89872		unknown protein contains similarity to UDPG glucosyltransferase GB:AAB62270 GI:2232354 from [Solanum berthaultii];supported by full-length cDNA: Ceres:1040.
260946_at	At1g06010	0.10027	0.336242	0.465377	0.611569	0.0435981	0.950281		NS	NS	NS		5.1097	5.34056	5.20978	5.40043		hypothetical protein predicted by genemark.hmm
260947_at	At1g06020	0.291916	0.622564	0.89436	0.250737	0.341268	0.55885		NS	NS	NS		3.56062	3.46156	3.55068	3.47334		fructokinase, putative similar to fructokinase GB:U62329 GI:1915973 from [Lycopersicon esculentum]
260956_at	At1g06040	0.00385386	0.624117	0.00102221	0.211051	1.73965e-05	0.760868		NS	0.00102221	1.73965e-05		8.41484	9.21111	8.9508	9.37759		salt-tolerance protein identical to salt-tolerance protein GB:CAA64819 GI:1565225 from [Arabidopsis thaliana];supported by full-length cDNA: Ceres:39912.
260959_at	At1g06050	0.00123201	0.892641	0.00265473	0.262938	0.288046	0.622578		0.00123201	NS	NS		4.23524	4.66257	4.55878	4.34076		unknown protein ;supported by full-length cDNA: Ceres:99665.
260958_at	At1g06060	0.129474	0.456117	0.01896	0.380855	0.164225	0.922418		NS	NS	NS		6.37882	6.56847	6.59569	6.54745		unknown protein identical to unknown protein GB:AAF80129 GI:8810468 from [Arabidopsis thaliana];supported by full-length cDNA: Ceres:155315.
260953_at	At1g06070	0.354615	0.905056	0.251123	0.143076	0.0367701	0.159445		NS	NS	NS		5.10289	5.19535	5.21897	5.35139		transcriptional activator RF2a, putative similar to transcriptional activator RF2a GB:AF005492 GI:2253277 from [Oryza sativa];supported by full-length cDNA: Ceres:17213.
260957_at	At1g06080	0.5802	0.84313	0.407238	0.877117	0.0237961	0.683635		NS	NS	NS		3.52949	3.58856	3.62283	3.8897		delta 9 desaturase identical to delta 9 desaturase GB:BAA25180 GI:2970034 from [Arabidopsis thaliana]; supported by full-length cDNA: Ceres: 100525.
260948_at	At1g06100	0.609762	0.91059	0.267657	0.451489	0.804261	0.501661		NS	NS	NS		3.82614	3.7637	3.96206	3.85438		delta 9 desaturase, putative similar to delta 9 desaturase GB:BAA25180 GI:2970034 from [Arabidopsis thaliana]
260949_at	At1g06110	0.000147485	0.274278	0.000116522	0.231501	0.000275657	0.226236		0.000147485	0.000116522	0.000275657		6.22947	6.79192	6.82228	6.74853		F-box protein family contains similarity to F-box protein FBX3 GI:6103643 from [Homo sapiens]
260950_s_at	At1g06120	0.637512	0.349125	0.373268	0.042934	0.428699	0.855894		NS	NS	NS		3.44859	3.40155	3.35227	3.52788		delta 9 desaturase, putative similar to delta 9 desaturase GB:BAA25180 GI:2970034 from [Arabidopsis thaliana]; supported by cDNA: gi_12083275_gb_AF332434.1_AF332434
260954_at	At1g06130	0.33836	0.0590273	0.892087	0.31092	0.147293	0.534701		NS	NS	NS		5.82611	5.89433	5.83571	5.98205		glyoxalase II isozyme, putative similar to glyoxalase II isozyme GB:AAC49865 GI:2570338 from [Arabidopsis thaliana];supported by full-length cDNA: Ceres:17756.
260952_at	At1g06140	0.392499	0.972455	0.0116744	0.0275508	0.860941	0.0388441		NS	NS	NS		3.84963	3.9215	4.0347	3.83748		hypothetical protein predicted by genemark.hmm
260951_at	At1g06150	0.287595	0.0806165	0.210189	0.0429776	0.125018	0.694448		NS	NS	NS		4.05851	3.97575	3.9563	3.92748		hypothetical protein similar to hypothetical protein GB:AAD20673 GI:4432823 from [Arabidopsis thaliana]
260783_at	At1g06160	0.716752	0.421225	0.372321	0.168899	0.020891	0.351544		NS	NS	NS		3.35053	3.38413	3.30448	3.50105		ethylene response factor, putative similar to ethylene response factor 1 GB:AAD03544 GI:4128208 from [Arabidopsis thaliana]
257491_at	At1g06170	0.0947115	0.107339	0.970988	0.467509	0.609486	0.032669		NS	NS	NS		2.79696	2.88058	2.79864	2.77862		hypothetical protein predicted by genemark.hmm, contains Pfam profile:PF00010 Helix-loop-helix DNA-binding domain
260784_at	At1g06180	0.0363803	0.220976	0.107936	0.899254	0.752776	0.939771		NS	NS	NS		2.93944	3.03765	3.01544	2.95817		MYB-related protein identical to GB:CAA90748 GI:1263093 from [Arabidopsis thaliana]
260793_at	At1g06190	0.298031	0.206097	0.746223	0.568533	0.829125	0.942955		NS	NS	NS		7.47562	7.59215	7.50938	7.50406		unknown protein ;supported by full-length cDNA: Ceres:114093.
260785_at	At1g06200	0.00137159	0.950314	0.00125271	0.602706	0.00191808	0.323146		0.00137159	NS	0.00191808		7.89204	8.20607	8.08949	8.15716		hypothetical protein predicted by genscan+
260794_at	At1g06210	0.907094	0.446077	0.574694	0.810189	0.468287	0.95963		NS	NS	NS		5.53109	5.51241	5.4731	5.62477		unknown protein ; supported by cDNA: gi_15450710_gb_AY052723.1_
260786_s_at	At1g06220	0.399271	0.316557	0.48538	0.56588	0.33958	0.216661		NS	NS	NS		6.78224	6.65004	6.69178	6.65239		unknown protein similar to Cryptosporidium parvum elongation factor-2 GB:U21667 GI:706974 from [Cryptosporidium parvum]
260795_at	At1g06225	0.962829	0.579804	0.239365	0.584735	0.462987	0.218206		NS	NS	NS		3.24664	3.25112	3.13537	3.17979		CLE3, putative CLAVATA3/ESR-Related 3 (CLE3)
260787_at	At1g06230	0.151997	0.787393	0.816379	0.861414	0.304333	0.628381		NS	NS	NS		5.67085	5.88433	5.64552	5.80117		Ring3-like bromodomain protein similar to Ring3 GB:BAA25416 GI:3041763 from [Mus musculus], contains Pfam profile:PF00439 Bromodomain
260790_at	At1g06240	0.0719502	0.688799	0.0117497	0.872259	0.379767	0.10512		NS	NS	NS		5.64129	5.44316	5.33686	5.55002		hypothetical protein predicted by genscan+
260791_at	At1g06250	0.118656	0.306166	0.574054	0.30946	0.454742	0.102365		NS	NS	NS		3.0211	3.14162	3.05628	3.06805		lipase-like protein similar to lipase GB:AAD01804 GI:4103627 from [Dianthus caryophyllus];supported by full-length cDNA: Ceres:12912.
260788_at	At1g06260	0.708618	0.697736	0.41068	0.178565	0.210901	0.290332		NS	NS	NS		3.2695	3.24326	3.34081	3.37916		cysteine proteinase contains similarity to thiol-protease, pre-pro-TPE4A protein GI:3688528 [Pisum sativum]
260792_at	At1g06270	0.0359192	0.863726	0.0193679	0.0831684	0.900354	0.102323		NS	NS	NS		3.97825	3.80367	3.77257	3.98881		unknown protein ;supported by full-length cDNA: Ceres:105154.
260789_s_at	At1g06290	0.375054	0.790814	0.86411	0.635396	0.789642	0.984557		NS	NS	NS		7.37811	7.23886	7.40304	7.34044		acyl-CoA oxidase ACX3 identical to acyl-CoA oxidase ACX3 GI:8163758 from [Arabidopsis thaliana]
259419_at	At1g06310	0.861092	0.705284	0.155349	0.171889	0.235649	0.0408014		NS	NS	NS		3.33904	3.32993	3.26039	3.41474		acyl-CoA oxidase ACX3, putative similar to acyl-CoA oxidase ACX3 GI:8163758 from [Arabidopsis thaliana]
259389_at	At1g06320	0.849945	0.0550698	0.614252	0.176026	0.417411	0.807673		NS	NS	NS		3.13727	3.11972	3.08803	3.04581		hypothetical protein predicted by genemark.hmm
259390_at	At1g06340	0.582218	0.182799	0.822113	0.327375	0.868376	0.927815		NS	NS	NS		3.54205	3.48067	3.5182	3.55886		hypothetical protein predicted by genemark.hmm
259391_s_at	At1g06350	0.884192	0.634343	0.52162	0.855315	0.742816	0.918196		NS	NS	NS		3.86748	3.89855	3.98962	3.92715		delta 9 desaturase, putative similar to delta 9 desaturase GI:2970034 from [Arabidopsis thaliana]
259392_at	At1g06380	0.010036	0.837003	0.000309517	0.561456	0.00240429	0.117823		NS	0.000309517	0.00240429		4.99664	4.71263	4.50823	4.57654		hypothetical protein similar to hypothetical protein GI:6598642 from [Arabidopsis thaliana]
259396_at	At1g06390	0.0887714	0.755428	0.477519	0.713733	0.0127085	0.216361		NS	NS	NS		6.60423	6.44507	6.54535	6.32084		shaggy-like kinase, putative similar to Petunia Shaggy kinase 4 GI:619894 from [Petunia hybrida]; supported by cDNA: gi_14334749_gb_AY035048.1_
259395_at	At1g06400	0.0970782	0.277409	0.0232233	0.401135	0.620696	0.494318		NS	NS	NS		6.86117	6.96588	7.02728	6.91007		GTP-binding protein(RAB11D), putative similar to RAB11D GI:1370148 from [Lotus japonicus]; supported by cDNA: gi_12083263_gb_AF332428.1_AF332428
259393_at	At1g06410	0.690171	0.535705	0.574534	0.862788	0.0482679	0.702652		NS	NS	NS		7.68856	7.63634	7.63248	7.4359		trehalose-6-phosphate synthase, putative similar to trehalose-6-phosphate synthase GI:4468259 from [Pichia angusta]
259394_at	At1g06420	0.939859	0.972921	0.730006	0.594575	0.757874	0.180507		NS	NS	NS		2.92378	2.92972	2.95575	2.94837		hypothetical protein predicted by genemark.hmm
262626_at	At1g06430	0.275803	0.78062	0.0350276	0.808656	0.00229693	0.279191		NS	NS	0.00229693		7.55889	7.6905	7.79422	7.94097		FtsH protease, putative similar to zinc dependent protease GI:7650138 from [Arabidopsis thaliana]
262625_at	At1g06440	0.0645784	0.277541	0.494711	0.987419	0.240111	0.565914		NS	NS	NS		3.24363	3.33824	3.28003	3.18696		hypothetical protein predicted by genemark.hmm
262624_at	At1g06450	0.787055	0.978684	0.729153	0.785442	0.381837	0.805918		NS	NS	NS		3.39591	3.4245	3.43391	3.30979		CCR4-associated factor, putative similar to CCR4-associated factor-1 SP:Q60809 [Mus musculus (Mouse)]
262629_at	At1g06460	0.0444784	0.43186	0.0136364	0.552928	0.00173479	0.327531		NS	NS	0.00173479		10.9398	11.1426	11.1587	11.2547		heat shock protein, putative contains Pfam profile: PF00011 Hsp20/alpha crystallin family;supported by full-length cDNA: Ceres:21735.
262623_at	At1g06470	0.558954	0.081911	0.206625	0.478271	0.430838	0.911703		NS	NS	NS		6.18949	6.13486	6.06229	6.11648		integral membrane protein, putative contains Pfam profile: PF00892 Integral membrane protein DUF6
262628_at	At1g06490	0.50376	0.55825	0.380007	0.97011	0.124285	0.607149		NS	NS	NS		3.59714	3.53775	3.70039	3.73817		glucan synthase, putative similar to glucan synthase GB:AAD11794 [Filobasidiella neoformans var. neoformans]
262631_at	At1g06500	0.882455	0.789517	0.231388	0.345471	0.018664	0.202171		NS	NS	NS		4.28629	4.31146	4.44606	4.62943		hypothetical protein predicted by genemark.hmm;supported by full-length cDNA: Ceres:7311.
262622_at	At1g06510	0.238052	0.487622	0.928821	0.961602	0.510685	0.929016		NS	NS	NS		5.70169	5.53671	5.71326	5.7797		hypothetical protein predicted by genemark.hmm
262630_at	At1g06520	0.200432	0.3768	0.0928812	0.532996	0.467834	0.489333		NS	NS	NS		3.60186	3.49113	3.42727	3.5342		unknown protein ;supported by full-length cDNA: Ceres:94974.
262621_at	At1g06530	0.0305822	0.312238	0.0708342	0.781452	0.150965	0.205948		NS	NS	NS		7.64734	7.41807	7.45661	7.51161		hypothetical protein
262620_at	At1g06540	0.332771	0.0702991	0.649156	0.796223	0.0755728	0.802661		NS	NS	NS		3.62878	3.59064	3.64971	3.76308		hypothetical protein predicted by genscan+
262619_at	At1g06550	0.0947725	0.384604	0.649353	0.546581	0.00171265	0.0014338		NS	NS	0.00171265		5.6147	5.49104	5.58073	5.35618		3-hydroxyisobutyryl-coenzyme A hydrolase, putative similar to 3-hydroxyisobutyryl-coenzyme A hydrolase GB:AAC52114 GI:3320120 [Homo sapiens]
262618_at	At1g06560	0.319024	0.95544	0.968377	0.215285	0.00531989	0.0249694		NS	NS	NS		4.77452	4.69396	4.77026	4.48392		unknown protein
262635_at	At1g06570	0.0016658	0.452282	0.00454545	0.838926	0.0635418	0.495552		0.0016658	NS	NS		4.43689	5.05406	4.958	4.83516		4-hydroxyphenylpyruvate dioxygenase (HPD) identical to 4-hydroxyphenylpyruvate dioxygenase (HPD) SP:P93836 [Arabidopsis thaliana (Mouse-ear cress)]; supported by cDNA: gi_2145038_gb_AF000228.1_ATAF000228
262627_at	At1g06580	0.36068	0.862072	0.437212	0.141568	0.818478	0.440911		NS	NS	NS		3.4255	3.35621	3.36237	3.4453		hypothetical protein
262617_at	At1g06590	0.864847	0.317016	0.433891	0.273956	0.64066	0.169555		NS	NS	NS		3.95958	3.9792	4.05638	3.91287		unknown protein
262616_at	At1g06620	0.561519	0.631763	0.461386	0.479212	0.259131	0.981709		NS	NS	NS		3.19467	3.24243	3.13479	3.09509		oxidoreductase, putative contains Pfam profile: PF00671 Iron/Ascorbate oxidoreductase family
262633_at	At1g06630	0.0930993	0.0902412	0.791968	0.576134	0.0820816	0.699884		NS	NS	NS		4.80167	5.00964	4.76993	5.00954		Expressed protein ; supported by full-length cDNA: Ceres: 38014.
262637_at	At1g06640	0.207535	0.474414	0.605256	0.627548	0.736055	0.990687		NS	NS	NS		5.97209	6.45761	6.16778	6.09611		oxidoreductase, putative contains Pfam profile: PF00671 Iron/Ascorbate oxidoreductase family; supported by cDNA: gi_13430545_gb_AF360185.1_AF360185
262638_at	At1g06650	0.846599	0.0495985	0.170044	0.634393	0.925806	0.769831		NS	NS	NS		7.36461	7.38606	7.53311	7.37745		oxidoreductase, putative contains Pfam profile: PF00671 Iron/Ascorbate oxidoreductase family; supported by cDNA: gi_13878118_gb_AF370322.1_AF370322
262636_at	At1g06670	0.123174	0.184034	0.437747	0.914828	0.765423	0.501354		NS	NS	NS		5.12175	4.8847	5.01889	5.07691		DEIH-box RNA/DNA helicase identical to DEIH-box RNA/DNA helicase GB:BAA84364 GI:5881579 [Arabidopsis thaliana]; supported by cDNA: gi_5881578_dbj_D84225.1_D84225
262632_at	At1g06680	0.236699	0.630176	0.362929	0.602163	0.60705	0.659008		NS	NS	NS		13.0769	13.0323	13.0539	13.0573		23 kDa polypeptide of oxygen-evolving comlex (OEC) identical to 23 kDa polypeptide of oxygen-evolving comlex (OEC) GB:CAA66785 GI:1769905 [Arabidopsis thaliana];supported by full-length cDNA: Ceres:33922.
262634_at	At1g06690	0.760571	0.279691	0.72509	0.886943	0.398953	0.439435		NS	NS	NS		7.03963	6.99047	6.9728	7.17937		unknown protein ; supported by cDNA: gi_15215593_gb_AY050325.1_
260835_at	At1g06700	0.245786	0.82949	0.409192	0.0564603	0.957856	0.160948		NS	NS	NS		7.26645	7.36792	7.22408	7.26931		protein kinase interactor, putative similar to Pto kinase interactor GB:1AAC61805 GI:3668069 from [Lycopersicon esculentum]; supported by cDNA: gi_13877994_gb_AF370260.1_AF370260
260826_at	At1g06710	0.945637	0.367471	0.755141	0.97426	0.32704	0.990767		NS	NS	NS		3.58734	3.59622	3.62289	3.71038		hypothetical protein predicted by genemark.hmm
260824_at	At1g06720	0.0391834	0.845756	0.0349735	0.216411	0.0268321	0.38192		NS	NS	NS		3.92592	3.61059	3.69696	3.6144		unknown protein
260834_at	At1g06730	0.252742	0.540512	0.160878	0.62134	0.201793	0.763716		NS	NS	NS		4.41697	4.2754	4.26377	4.27019		sugar kinase, putative similar to ribokinase GB:AAD00536 GI:4099074 from [Pyrobaculum aerophilum]; supported by cDNA: gi_13605672_gb_AF361817.1_AF361817
260827_at	At1g06740	0.0309914	0.667043	0.0391361	0.988287	0.0191589	0.864172		NS	NS	NS		4.56623	4.7665	4.80997	4.79878		mudrA-like protein similar to Mu transposable element protein mudrA GB:AAA21566 GI:540581 from [Zea mays]
260828_at	At1g06750	0.0625882	0.431088	0.790783	0.241802	0.411337	0.744467		NS	NS	NS		3.06406	2.96176	3.05122	3.15915		unknown protein
260830_at	At1g06760	0.792345	0.0462792	0.918364	0.193005	0.432959	0.27419		NS	NS	NS		8.57567	8.55237	8.58384	8.6447		histone H1, putative similar to histone H1-1 GB:CAA44312 GI:16314 from [Arabidopsis thaliana];supported by full-length cDNA: Ceres:24648.
260823_at	At1g06770	0.474475	0.561224	0.178959	0.693253	0.423463	0.168254		NS	NS	NS		3.94535	4.0713	3.82219	3.86367		hypothetical protein predicted by genemark.hmm
260832_at	At1g06780	0.354996	0.037337	0.0784919	0.872198	0.31579	0.509823		NS	NS	NS		5.1804	5.2928	5.44114	5.30684		unknown protein ; supported by cDNA: gi_15028086_gb_AY045900.1_
260822_at	At1g06790	0.0396037	0.747677	0.0182236	0.758604	0.233691	0.882004		NS	NS	NS		5.66363	5.34718	5.29363	5.4698		RNA polymerase, putative similar to DNA directed RNA polymerase III subunit GB:CAA21883 GI:3850072 from [Schizosaccharomyces pombe]
260833_at	At1g06800	0.468013	0.422198	0.769554	0.152305	0.316658	0.570057		NS	NS	NS		3.94629	3.86572	3.91412	3.821		lipase, putative similar to lipase GB:AAD01804 GI:4103627 from [Dianthus caryophyllus]; supported by cDNA: gi_15529150_gb_AY052199.1_
260825_at	At1g06810	0.928852	0.850756	0.0703492	0.0521775	0.908409	0.641202		NS	NS	NS		3.61615	3.60869	3.52106	3.6232		hypothetical protein predicted by genemark.hmm
260821_at	At1g06820	0.339152	0.159259	0.137209	0.474121	0.127955	0.359026		NS	NS	NS		6.22463	6.13864	6.07363	6.03312		unknown protein contains Pfam profile:PF02032 Phytoene dehydrogenase related enzyme
260831_at	At1g06830	0.788787	0.40848	0.0527582	0.137014	0.378537	0.0370592		NS	NS	NS		6.85403	6.90892	6.52338	6.69588		glutaredoxin, putative similar to glutaredoxin GB:CAA89699 GI:1732424 from [Ricinus communis];supported by full-length cDNA: Ceres:125679.
260820_at	At1g06840	0.300932	0.311462	0.978619	0.465719	0.685018	0.387008		NS	NS	NS		4.78342	4.88027	4.78667	4.82583		receptor protein kinase, putative similar to receptor protein kinase GB:BAA11869 GI:1389566 from [Arabidopsis thaliana]
260819_at	At1g06850	0.81697	0.637475	0.47707	0.625324	0.09039	0.264396		NS	NS	NS		3.39305	3.41029	3.45426	3.22709		b-Zip DNA binding protein, putative similar to b-Zip DNA binding protein GB:CAB06697 GI:2246376 from [Arabidopsis thaliana]
260829_s_at	At1g06870	0.668956	0.7767	0.630063	0.296571	0.334754	0.458322		NS	NS	NS		7.69344	7.64339	7.75822	7.56211		chloroplast thylakoidal processing peptidase, putative similar to chloroplast thylakoidal processing peptidase GB:CAA71502 GI:2769566 from [Arabidopsis thaliana];supported by full-length cDNA: Ceres:15392.
260818_at	At1g06890	0.0762392	0.623442	0.316886	0.71486	0.060187	0.280358		NS	NS	NS		6.7782	6.57412	6.68348	6.60192		unknown protein
260817_at	At1g06900	0.0514145	0.942278	0.0193199	0.321578	0.124505	0.210336		NS	NS	NS		6.08321	5.83999	5.77278	5.89097		unknown protein
260816_at	At1g06930	0.701974	0.345786	0.566252	0.30976	0.878732	0.070591		NS	NS	NS		4.14419	4.10952	4.0987	4.15111		hypothetical protein predicted by genscan+
260815_at	At1g06950	0.0852045	0.150012	0.11899	0.364545	0.0589229	0.646346		NS	NS	NS		7.71812	7.47437	7.501	7.35785		chloroplast inner envelope protein, putative similar to chloroplast inner envelope protein GB:CAA92823 GI:1495768 from [Pisum sativum]
256052_at	At1g06960	0.58167	0.941643	0.677378	0.953032	0.400316	0.0749779		NS	NS	NS		5.39165	5.45565	5.4454	5.48924		spliceosomal protein (U2B), putative similar to spliceosomal protein (U2B) GI:169588 from [Solanum tuberosum]
256051_at	At1g06970	0.120146	0.0377926	0.234232	0.509614	0.377125	0.211541		NS	NS	NS		3.33135	3.4822	3.46273	3.4182		hypothetical protein similar to putative Na+/H+ antiporter GI:2347190 from [Arabidopsis thaliana]
256066_at	At1g06980	0.308729	0.0194525	0.31357	0.265685	0.0849491	0.084846		NS	NS	NS		4.1612	4.25209	4.22894	4.30684		hypothetical protein similar to hypothetical protein GI:2347189 from [Arabidopsis thaliana];supported by full-length cDNA: Ceres:7713.
256059_at	At1g06990	0.971305	0.863337	0.931631	0.409369	0.328726	0.143589		NS	NS	NS		3.20296	3.20591	3.20862	3.32179		hypothetical protein contains similarity to early nodule-specific protein GI:3328240 from [Medicago truncatula];supported by full-length cDNA: Ceres:2087.
256050_at	At1g07000	0.126641	0.618624	0.223743	0.223936	0.207181	0.446611		NS	NS	NS		5.43407	5.01515	5.7121	5.13394		leucine zipper protein, putative similar to leucine zipper protein GI:10177020 from [Arabidopsis thaliana]
256049_at	At1g07010	0.852656	0.390705	0.241283	0.40629	0.32108	0.159803		NS	NS	NS		5.73258	5.70601	5.57943	5.84933		unknown protein
256064_at	At1g07020	0.107751	0.977865	0.327588	0.539895	0.975377	0.727362		NS	NS	NS		5.65676	5.23958	5.797	5.6616		Expressed protein ; supported by full-length cDNA: Ceres: 250775.
256048_at	At1g07025	0.657223	0.03115	0.546258	0.530901	0.992016	0.79052		NS	NS	NS		3.36797	3.39235	3.42153	3.36854		hypothetical protein contains similarity to mitochondrial carrier proteins
256055_at	At1g07030	0.285894	0.995639	0.169171	0.842464	0.718515	0.624205		NS	NS	NS		5.19389	5.0626	5.05564	5.14514		mitochondrial carrier protein, putative similar to mitochondrial carrier protein GI:3378495 from [Ribes nigrum]
256061_at	At1g07040	0.00050171	0.722964	0.0010089	0.567475	0.00221993	0.72511		0.00050171	0.0010089	0.00221993		7.01967	7.39195	7.43992	7.43315		unknown protein ;supported by full-length cDNA: Ceres:36434.
256060_at	At1g07050	0.933671	0.116085	0.888238	0.873818	0.570899	0.873981		NS	NS	NS		9.17106	9.18223	9.15524	9.23283		hypothetical protein contains similarity to photoperiod sensitivity quantitative trait locus (Hd1) GI:11094203 from [Oryza sativa];supported by full-length cDNA: Ceres:1955.
256047_at	At1g07060	0.0494142	0.383996	0.201613	0.835838	0.064191	0.824732		NS	NS	NS		3.60223	3.34995	3.43635	3.35604		hypothetical protein predicted by genemark.hmm
256065_at	At1g07070	0.00047701	0.862365	0.00459097	0.954596	0.00179232	0.520358		0.00047701	NS	0.00179232		6.47492	5.95047	5.99112	6.07994		ribosomal protein, putative similar to ribosomal protein L35a GI:57118 from [Rattus norvegicus]; supported by full-length cDNA: Ceres: 2778.
256034_at	At1g07080	0.00196635	0.326835	0.00376472	0.214335	0.00290549	0.70799		0.00196635	NS	NS		8.64439	8.82201	8.84653	8.90992		unknown protein ; supported by cDNA: gi_15146333_gb_AY049308.1_
256062_at	At1g07090	0.0405477	0.272548	0.00390858	0.574278	0.016041	0.922241		NS	NS	NS		5.2987	4.81145	4.72655	4.75948		unknown protein ;supported by full-length cDNA: Ceres:28780.
256036_at	At1g07110	0.794992	0.400574	0.231937	0.958343	0.362033	0.672663		NS	NS	NS		9.30233	9.27547	9.18414	9.21841		fructose-2,6-bisphosphatase, putative similar to fructose-2,6-bisphosphatase GI:8572069 from [Arabidopsis thaliana]; supported by cDNA: gi_13096097_gb_AF190739.2_AF190739
256054_at	At1g07120	0.218267	0.930276	0.221072	0.19278	0.986044	0.144603		NS	NS	NS		3.46412	3.55634	3.36951	3.46548		unknown protein
256063_at	At1g07130	0.567517	0.536291	0.906749	0.122713	0.29448	0.913784		NS	NS	NS		3.46879	3.5204	3.45581	3.37842		Expressed protein ; supported by full-length cDNA: Ceres: 25069.
256046_at	At1g07135	0.00106267	0.635776	0.055722	0.976424	0.00595421	0.656364		0.00106267	NS	NS		4.30381	4.77827	4.63156	4.71032		unknown protein
256035_at	At1g07140	0.0071044	0.482118	0.132905	0.560933	0.0282165	0.498292		NS	NS	NS		8.92246	8.63655	8.79184	8.64897		Ran-binding protein (atranbp1a) identical to Ran-binding protein (atranbp1a) GI:2058282 from [Arabidopsis thaliana]; supported by cDNA: gi_15294205_gb_AF410294.1_AF410294
256045_at	At1g07150	0.50686	0.929708	0.607017	0.949926	0.552605	0.44191		NS	NS	NS		3.58284	3.64804	3.53433	3.51873		MAP3K gamma protein kinase, putative similar to MAP3K gamma protein kinase GI:2315153 from [Arabidopsis thaliana]
256044_at	At1g07160	0.892979	0.520108	0.247181	0.270134	0.172813	0.0419996		NS	NS	NS		3.83607	3.82701	3.75732	3.9326		protein phosphatase 2C, putative similar to protein phosphatase 2C GI:2582800 from [Medicago sativa]
256067_at	At1g07170	0.118702	0.656221	0.0556282	0.292601	0.877727	0.290821		NS	NS	NS		6.11407	6.24129	6.30479	6.09998		unknown protein ;supported by full-length cDNA: Ceres:94739.
256057_at	At1g07180	0.00135812	0.75726	0.00761266	0.531229	0.00319418	0.275413		0.00135812	NS	NS		4.37976	5.32904	5.13407	5.19985		unknown protein contains similarity to alternative NADH-dehydrogenase GI:3718005 from [Yarrowia lipolytica];supported by full-length cDNA: Ceres:114420.
256056_at	At1g07190	0.0565745	0.861242	0.0963222	0.89483	0.181198	0.21407		NS	NS	NS		2.93755	3.06451	3.07937	3.06033		hypothetical protein contains similarity to ATP-dependent protease
256043_at	At1g07210	0.00295763	0.481334	0.0309818	0.296555	0.00481121	0.186934		NS	NS	NS		5.52786	5.0848	5.27325	5.31638		hypothetical protein contains Pfam profile: PF01084 ribosomal protein S18
256042_at	At1g07220	0.220124	0.3567	0.873696	0.241981	0.426773	0.938564		NS	NS	NS		4.52283	4.31706	4.5445	4.41067		hypothetical protein predicted by genemark.hmm
256041_at	At1g07230	0.0382884	0.125873	0.00196165	0.252025	0.0102106	0.459319		NS	NS	NS		6.19715	6.41589	6.59239	6.49172		unknown protein
256058_at	At1g07240	0.0122155	0.176682	0.315285	0.561651	0.0532219	0.234937		NS	NS	NS		6.36983	6.6551	6.4946	6.64481		UDP-glucose glucosyltransferase, putative similar to UDP-glucose glucosyltransferase GI:453245 from [Manihot esculenta];supported by full-length cDNA: Ceres:6797.
256033_at	At1g07250	0.0140487	0.400071	0.609537	0.805284	0.0664513	0.531841		NS	NS	NS		6.88777	7.23765	6.96845	7.15963		UDP-glucose glucosyltransferase, putative similar to UDP-glucose glucosyltransferase GI:453245 from [Manihot esculenta]; supported by cDNA: gi_14532789_gb_AY040019.1_
256053_at	At1g07260	0.015268	0.402217	0.33199	0.720321	0.356453	0.21472		NS	NS	NS		3.31545	3.58525	3.40803	3.40166		UDP-glucose glucosyltransferase, putative similar to UDP-glucose glucosyltransferase GI:453245 from [Manihot esculenta]
256040_at	At1g07270	0.287645	0.536659	0.400921	0.445807	0.701167	0.106996		NS	NS	NS		3.49206	3.39613	3.42759	3.45822		hypothetical protein similar to putative CDC6 protein GI:3582344 from [Arabidopsis thaliana]
261075_at	At1g07280	0.814058	0.471737	0.610116	0.750502	0.700279	0.420936		NS	NS	NS		8.55137	8.51525	8.47707	8.59989		unknown protein
261074_at	At1g07290	0.479315	0.71499	0.160984	0.464078	0.316718	0.117868		NS	NS	NS		3.66686	3.58351	3.52515	3.57841		hypothetical protein predicted by genemark.hmm
261073_at	At1g07300	0.0903308	0.360853	0.0754046	0.132735	0.320941	0.0782453		NS	NS	NS		3.71368	3.88338	3.90998	3.82344		hypothetical protein predicted by genemark.hmm
261083_at	At1g07310	0.0632255	0.291802	0.051457	0.962663	0.023576	0.985818		NS	NS	NS		7.18218	7.35632	7.43984	7.42241		unknown protein ; supported by cDNA: gi_15451131_gb_AY054646.1_
261078_at	At1g07320	0.0117264	0.639586	0.00579848	0.563715	0.0143974	0.8562		NS	NS	NS		10.529	10.3274	10.2973	10.3488		unknown protein identical to SP:O50061 from [Arabidopsis thaliana];supported by full-length cDNA: Ceres:12704.
257489_at	At1g07330	0.192942	0.332545	0.513734	0.755003	0.435639	0.629041		NS	NS	NS		3.50111	3.41943	3.55145	3.55805		hypothetical protein predicted by genemark.hmm
261072_at	At1g07340	0.654962	0.448879	0.311926	0.535454	0.193896	0.162302		NS	NS	NS		3.31139	3.35249	3.2101	3.44504		hexose transporter, putative similar to GB:CAB52689 from [Lycopersicon esculentum]
261081_at	At1g07350	0.00187913	0.991352	0.00352572	0.221025	0.00863788	0.919637		0.00187913	NS	NS		6.75168	5.82868	5.99053	6.09003		transformer-SR ribonucleoprotein, putative similar to GB:Y09506 from [Nicotiana tabacum] (Plant Mol. Biol. 35 (3), 261-269 (1997)); supported by cDNA: gi_15292732_gb_AY050800.1_
261082_at	At1g07360	0.194484	0.035065	0.191495	0.50714	0.145423	0.103174		NS	NS	NS		6.72929	6.64873	6.61884	6.8593		unknown protein ; supported by cDNA: gi_15450877_gb_AY054519.1_
261080_at	At1g07370	0.0165203	0.71473	0.122536	0.773844	0.114629	0.902841		NS	NS	NS		5.99594	5.52237	5.69157	5.68863		proliferating cellular nuclear antigen identical to GB:AAF40018 from [Arabidopsis thaliana];supported by full-length cDNA: Ceres:28554.
261071_at	At1g07380	0.0819614	0.256391	0.0453745	0.319901	0.0344899	0.76115		NS	NS	NS		4.16966	4.38484	4.43861	4.54665		unknown protein
261070_at	At1g07390	0.814336	0.457225	0.403604	0.688565	0.746473	0.0682368		NS	NS	NS		3.53943	3.57059	3.42964	3.50336		disease resistance protein, putative similar to GB:AAC15780 from [Lycopersicon pimpinellifolium] (Cell 84 (3), 451-459 (1996))
261069_at	At1g07410	0.884775	0.922538	0.579802	0.0745692	0.774968	0.201543		NS	NS	NS		3.56268	3.55257	3.60022	3.54677		small G protein, putative similar to GB:Z49190 from [Beta vulgaris]
261076_at	At1g07420	0.346933	0.811328	0.522044	0.919009	0.317901	0.640747		NS	NS	NS		6.98596	7.14839	7.10598	7.17671		unknown protein ;supported by full-length cDNA: Ceres:33426.
261077_at	At1g07430	0.556999	0.724738	0.511834	0.629898	0.267573	0.351291		NS	NS	NS		3.95813	3.85321	3.80751	4.22676		protein phosphatase 2C, putative similar to GB:CAB90633 from [Fagus sylvatica];supported by full-length cDNA: Ceres:118185.
261084_at	At1g07440	0.439362	0.108432	0.526548	0.643623	0.189828	0.496013		NS	NS	NS		8.24171	8.1732	8.14296	8.41388		tropinone reductase-I, putative similar to GB:L20473 from [Datura stramonium] (Proc. Natl. Acad. Sci. U.S.A. 90, 9591-9595 (1993)); supported by cDNA: gi_13605590_gb_AF361621.1_AF361621
261068_at	At1g07450	0.860658	0.186145	0.272266	0.376914	0.635506	0.418706		NS	NS	NS		3.46908	3.45397	3.3715	3.42344		tropinone reductase-I, putative similar to GB:L20473 from [Datura stramonium] (Proc. Natl. Acad. Sci. U.S.A. 90, 9591-9595 (1993))
261067_at	At1g07460	0.58097	0.496078	0.58395	0.708552	0.662429	0.0216314		NS	NS	NS		2.97551	2.94759	3.01058	2.99735		lectin, putative contains Pfam profile: PF00138, Legume lectins alpha and PF00139, Legume lectins beta domain
261079_s_at	At1g07470	0.372959	0.381292	0.167455	0.647575	0.169402	0.929075		NS	NS	NS		6.37742	6.51234	6.63207	6.65237		transcription factor IIA large subunit similar to GB:CAA11525 from [Arabidopsis thaliana];supported by full-length cDNA: Ceres:19512.
261066_at	At1g07490	0.158059	0.382423	0.0922825	0.812834	0.705458	0.262888		NS	NS	NS		3.01483	2.88656	2.87137	3.04692		hypothetical protein predicted by genemark.hmm
261065_at	At1g07500	0.151653	0.22539	0.829167	0.637151	0.287587	0.378942		NS	NS	NS		3.77454	4.00186	3.74304	3.90442		hypothetical protein predicted by genemark.hmm
261064_at	At1g07510	0.780488	0.507991	0.401068	0.174146	0.283294	0.714555		NS	NS	NS		6.15917	6.18149	6.21362	6.10459		unknown protein
261063_at	At1g07520	0.126124	0.00172518	0.296464	0.655579	0.841036	0.87223		NS	NS	NS		3.65601	3.76144	3.77328	3.68266		transcription factor scarecrow-like 14, putative similar to GB:AAD24412 from [Arabidopsis thaliana] (Plant J. 18 (1), 111-119 (1999))
261062_at	At1g07530	0.923394	0.227771	0.8564	0.672982	0.80513	0.53476		NS	NS	NS		5.26332	5.24849	5.23904	5.29515		transcription factor scarecrow-like 14, putative similar to GB:AAD24412 from [Arabidopsis thaliana] (Plant J. 18 (1), 111-119 (1999))
261061_at	At1g07540	0.586739	0.920378	0.263157	0.00368716	0.863989	0.164237		NS	NS	NS		3.34361	3.42991	3.41655	3.332		DNA-binding protein, putative contains Pfam profile: PF00249, Myb-like DNA-binding domain
261091_at	At1g07550	0.29435	0.463015	0.649483	0.681376	0.421658	0.471938		NS	NS	NS		3.16902	3.23811	3.2065	3.11379		protein kinase, putative contains Pfam profile: PF00069, Eukaryotic protein kinase domain (1 copy)
261090_at	At1g07560	0.603778	0.139817	0.116567	0.108105	0.563795	0.463418		NS	NS	NS		3.36577	3.32171	3.24899	3.32793		protein kinase, putative contains Pfam profile: PF00069 Eukaryotic protein kinase domain (1 copy)
261089_at	At1g07570	0.884519	0.663792	0.948673	0.759902	0.366744	0.184232		NS	NS	NS		3.9119	3.89308	3.92217	4.02661		protein kinase APK1A identical to SP:Q06548 from [Arabidopsis thaliana]
261088_at	At1g07590	0.0456549	0.115316	0.121287	0.0413179	0.221689	0.735552		NS	NS	NS		3.58512	3.4401	3.68821	3.52276		DNA-binding protein, putative similar to GB:AAF32491 from [Triticum aestivum] (Mol. Cell. Biol. 19 (12), 8113-8122 (1999))
261438_at	At1g07600	0.0963382	0.86648	0.014591	0.307911	0.0126661	0.214108		NS	NS	NS		12.5535	12.4077	12.3337	12.3517		metallothionein-like protein identical to SP:P43392 from (Arabidopsis thaliana)
261410_at	At1g07610	0.209632	0.658959	0.224096	0.465232	0.561872	0.300796		NS	NS	NS		8.33469	7.99972	8.01279	8.2128		metallothionein-like protein identical to SP:P43392 from (Arabidopsis thaliana);supported by full-length cDNA: Ceres:12642.
261435_at	At1g07620	0.130036	0.297203	0.170876	0.730013	0.29567	0.735637		NS	NS	NS		4.28597	4.09107	4.09852	4.14147		GTP-binding protein, putative similar to GB:M24537 from [Bacillus subtilis]
261413_at	At1g07630	0.230461	0.767849	0.879326	0.464837	0.73077	0.997659		NS	NS	NS		4.66147	4.49291	4.67579	4.71281		unknown protein ;supported by full-length cDNA: Ceres:120232.
261409_at	At1g07640	0.581855	0.732633	0.322817	0.583887	0.196987	0.29163		NS	NS	NS		6.51871	6.42622	6.3308	6.27904		zinc finger protein OBP2 identical to GB:AAD38986 from [Arabidopsis thaliana];supported by full-length cDNA: Ceres:4289.
261434_at	At1g07650	0.451026	0.653219	0.894275	0.766604	0.399517	0.721669		NS	NS	NS		6.9922	6.90496	6.97682	6.90678		receptor-like serine/threonine kinase, putative similar to GB:AAC50043 from [Arabidopsis thaliana] (Plant Mol. Biol. 37 (4), 587-596 (1998))
261433_s_at	At1g07670	0.423043	0.911826	0.169796	0.887412	0.341238	0.140342		NS	NS	NS		6.34078	6.42321	6.3782	6.36359		endoplasmic reticulum-type calcium-transporting ATPase 4 identical to GB:AAD29957 from [Arabidopsis thaliana] (Plant Physiol. 120 (1999) In press)
261432_at	At1g07680	0.470551	0.834268	0.141741	0.363724	0.179495	0.22229		NS	NS	NS		3.57405	3.64323	3.74116	3.72242		hypothetical protein predicted by genemark.hmm
261466_at	At1g07690	0.387726	0.184073	0.336118	0.102465	0.699151	0.53513		NS	NS	NS		3.39402	3.45945	3.32682	3.36533		hypothetical protein predicted by genemark.hmm
261417_at	At1g07700	0.025559	0.13814	0.00415803	0.349154	0.00372032	0.636626		NS	NS	NS		8.07433	8.21245	8.23978	8.3382		Expressed protein ; supported by cDNA: gi_15293296_gb_AY051082.1_
261465_at	At1g07705	0.126628	0.354471	0.771065	0.0417198	0.506142	0.249648		NS	NS	NS		5.3508	5.47371	5.33256	5.29131		unknown protein
261420_at	At1g07720	0.0032727	0.298065	0.00151593	0.00633204	2.55204e-05	0.0977153		NS	NS	2.55204e-05		7.22041	6.6377	6.66888	6.32959		fatty acid elongase 3-ketoacyl-CoA synthase, putative similar to GB:AAC99312 from [Arabidopsis thaliana] (Plant J. (1999) In press); supported by cDNA: gi_16226846_gb_AF428349.1_AF428349
261464_at	At1g07730	0.409219	0.497232	0.359223	0.721435	0.778868	0.92836		NS	NS	NS		3.81165	3.74705	3.73582	3.79131		disease resistance response protein, putative similar to GB:AAA33662 from [Pisum sativum] (Plant Mol. Biol. 11, 713-715 (1988))
261463_at	At1g07740	0.706105	0.0745967	0.172399	0.653741	0.3481	0.00562846		NS	NS	NS		3.65094	3.62134	3.57164	3.70212		hypothetical protein predicted by genscan+
261437_at	At1g07745	0.758333	0.844597	0.78479	0.749292	0.491878	0.720058		NS	NS	NS		3.90467	3.93634	3.93552	3.98746		hypothetical protein predicted by genscan+
261415_at	At1g07750	0.69884	0.401978	0.149382	0.975345	0.919295	0.750486		NS	NS	NS		6.54223	6.59287	6.39022	6.55444		globulin-like protein similar to GB:7595348 from [Cucumis melo];supported by full-length cDNA: Ceres:40551.
261416_at	At1g07770	0.0137962	0.741625	0.254076	0.3806	0.650738	0.332227		NS	NS	NS		9.59536	9.86971	9.70394	9.62979		ribosomal protein S15 identical to GB:AAA61608 from [Arabidopsis thaliana] (Plant Physiol. 106 (1), 401-402 (1994)); supported by full-length cDNA: Ceres: 5724.
261411_at	At1g07790	0.0236549	0.1705	0.0600618	0.929835	0.160959	0.478954		NS	NS	NS		6.99759	6.4601	6.57251	6.69894		histone H2B identical to GB:CAA73156 from [Arabidopsis thaliana] (Plant Physiol. 115 (4), 1385-1395 (1997));supported by full-length cDNA: Ceres:8711.
261414_at	At1g07795	0.369481	0.0414962	0.68805	0.843651	0.76808	0.550907		NS	NS	NS		4.32072	4.42996	4.36408	4.35263		Expressed protein ; supported by full-length cDNA: Ceres: 2535.
261408_s_at	At1g07820	0.0456668	0.706055	0.0419005	0.759127	0.148396	0.945182		NS	NS	NS		7.28038	6.92783	6.92775	7.04846		histone H4 identical to GB:M36659 from [Zea mays] (Plant Physiol. Biochem. 25, 235-247 (1987));supported by full-length cDNA: Ceres:27686.
261418_at	At1g07830	0.214386	0.550525	0.0690179	0.223285	0.0138819	0.569596		NS	NS	NS		5.5057	5.30377	5.28528	5.15717		mitochondrial ribosomal protein, putative similar to GB:CAA83057 from [Saccharomyces cerevisiae]; supported by cDNA: gi_14030694_gb_AF375438.1_AF375438
261419_at	At1g07840	0.267047	0.488791	0.0999002	0.650263	0.363367	0.924196		NS	NS	NS		5.14347	4.97537	4.92497	5.02495		hypothetical protein predicted by genemark.hmm; supported by cDNA: gi_15810572_gb_AY056325.1_
261462_at	At1g07850	0.160912	0.488025	0.735268	0.161114	0.17678	0.455819		NS	NS	NS		3.59661	3.75928	3.56702	3.71303		hypothetical protein predicted by genscan+
261461_at	At1g07860	0.153218	0.68376	0.923231	0.0256863	0.983737	0.630776		NS	NS	NS		2.92136	2.98294	2.91671	2.92024		hypothetical protein predicted by genemark.hmm
261436_at	At1g07870	0.832221	0.674318	0.378994	0.901664	0.96933	0.731453		NS	NS	NS		4.17899	4.14715	4.32448	4.1848		protein kinase, putative (fragment) similar to GB:BAA94509 from [Populus nigra]
261460_at	At1g07880	0.619117	0.910826	0.148084	0.883194	0.82316	0.834828		NS	NS	NS		3.34283	3.39716	3.48631	3.31955		MAP kinase, putative similar to GB:CAB37188 from [Medicago sativa]
261412_at	At1g07890	0.0011669	0.57243	0.0244434	0.105009	8.66138e-05	0.176205		0.0011669	NS	8.66138e-05		10.984	10.6555	10.8722	10.6021		L-ascorbate peroxidase identical to GB:CAA42168 from [Arabidopsis thaliana] (Plant Mol. Biol. 18 (4), 691-701 (1992));supported by full-length cDNA: Ceres:25057.
260677_at	At1g07910	0.330404	0.209026	0.963948	0.130895	0.526977	0.606983		NS	NS	NS		4.65003	4.55763	4.64416	4.72129		translation elongation factor EF-1 alpha identical to GB:AAB07881 from [Arabidopsis thaliana] (Mol. Gen. Genet. 219 (1-2), 106-112 (1989))
257495_at	At1g07960	0.0518253	0.142534	0.370765	0.47942	0.155405	0.0370687		NS	NS	NS		5.34985	5.23609	5.27797	5.1861		unknown protein
260678_at	At1g07970	0.303437	0.235931	0.789422	0.552725	0.920526	0.526284		NS	NS	NS		5.4429	5.34135	5.4702	5.43349		hypothetical protein predicted by genemark.hmm
260622_at	At1g07980	0.500003	0.337201	0.920221	0.206898	0.485383	0.917757		NS	NS	NS		4.69873	4.61128	4.68662	4.60194		hypothetical protein predicted by genemark.hmm;supported by full-length cDNA: Ceres:28026.
260679_at	At1g07990	0.0320912	0.750445	0.216745	0.918969	0.10506	0.748456		NS	NS	NS		5.33243	5.67204	5.50598	5.52264		unknown protein
260680_s_at	At1g08000	0.0224438	0.481033	0.152476	0.126261	0.0250181	0.405797		NS	NS	NS		4.20525	4.07681	4.30198	4.03704		GATA transcription factor 3, putative similar to PIR:T05288 from [Arabidopsis thaliana]
260681_at	At1g08020	0.163176	0.281559	0.287391	0.101457	0.718732	0.254372		NS	NS	NS		3.2908	3.37584	3.37732	3.32467		hypothetical protein predicted by genemark.hmm
260647_at	At1g08030	0.340595	0.891147	0.963918	0.143293	0.321062	0.356661		NS	NS	NS		4.64814	4.74953	4.64237	4.76026		hypothetical protein predicted by genemark.hmm
260626_at	At1g08040	0.786563	0.545906	0.926612	0.870274	0.329652	0.462626		NS	NS	NS		6.38455	6.35889	6.39312	6.49214		storage protein, putative similar to GB:CAA53781 from [Dioscorea cayenensis] (Plant Mol. Biol. 28 (3), 369-380 (1995)); supported by cDNA: gi_15810566_gb_AY056322.1_
260648_at	At1g08050	0.494972	0.430004	0.746779	0.416117	0.893032	0.166622		NS	NS	NS		3.90859	3.97993	3.95117	3.92223		unknown protein
260625_at	At1g08060	0.841223	0.944762	0.116035	0.781143	0.183704	0.695777		NS	NS	NS		4.44393	4.47829	4.75115	4.68372		storage protein, putative similar to GB:CAA53781 from [Dioscorea cayenensis] (Plant Mol. Biol. 28 (3), 369-380 (1995)); supported by cDNA: gi_8132767_gb_AF213627.1_AF213627
260621_at	At1g08065	0.478674	0.751739	0.15715	0.457999	0.0362795	0.204924		NS	NS	NS		3.04333	3.09388	3.14369	3.20792		carbonic anhydrase, putative
260620_at	At1g08070	0.451406	0.0897156	0.40929	0.428967	0.096767	0.246198		NS	NS	NS		3.28077	3.22398	3.19091	3.14291		unknown protein
260649_at	At1g08080	0.176725	0.305648	0.0702836	0.566857	0.962728	0.808997		NS	NS	NS		3.44252	3.34533	3.30998	3.44528		storage protein, putative similar to GB:CAA53781 from [Dioscorea cayenensis] (Plant Mol. Biol. 28 (3), 369-380 (1995))
260623_at	At1g08090	0.00317555	0.343044	0.0274435	0.766062	0.0808966	0.0145805		NS	NS	NS		4.15329	4.4988	4.41142	4.35966		high-affinity nitrate transporter NRT2 identical to GB:CAB09794 from [Arabidopsis thaliana]; supported by cDNA: gi_3608361_gb_AF019748.1_AF019748
260624_at	At1g08100	0.99747	0.2852	0.425479	0.0260277	0.273862	0.351925		NS	NS	NS		3.40787	3.40812	3.35213	3.32411		high-affinity nitrate transporter ACH2 identical to GB:AAC35884 from [Arabidopsis thaliana] (Plant J. 17 (5), 563-568 (1999)); supported by cDNA: gi_3608363_gb_AF019749.1_AF019749
260619_at	At1g08110	0.235325	0.0161336	0.918385	0.183473	0.561308	0.709174		NS	NS	NS		8.60026	8.65318	8.59493	8.64061		glyoxalase I, putative similar to GB:Y13239 from [Brassica juncea] (Plant J. 17 (4), 385-395 (1999))
261810_at	At1g08130	0.0436905	0.556095	0.182045	0.202406	0.0155519	0.352277		NS	NS	NS		5.26805	4.9169	5.12043	4.93139		ligase I, putative similar to ligase I GI:1161303 from [Xenopus laevis]
261816_at	At1g08150	0.195062	0.93916	0.857461	0.796416	0.312528	0.408995		NS	NS	NS		3.64028	3.48275	3.62296	3.536		unknown protein
261755_at	At1g08170	0.380366	0.499133	0.0020885	0.393174	0.49006	0.189341		NS	NS	NS		4.05756	3.99435	3.79737	4.09991		histone H2B, putative similar to GB:AAC15915 from (Chaetopterus variopedatus) (J. Mol. Evol. 46 (1), 64-73 (1998))
261817_at	At1g08180	0.692609	0.369115	0.733459	0.441154	0.570178	0.253519		NS	NS	NS		3.31767	3.34079	3.34295	3.35313		hypothetical protein predicted by genemark.hmm
261783_at	At1g08190	0.255118	0.367041	0.0927443	0.446705	0.694636	0.370553		NS	NS	NS		7.21279	7.32804	7.41396	7.2606		vacuolar assembly protein vps41, putative similar to vacuolar assembly protein vps41 GI:1835787 from [Lycopersicon esculentum]
261757_at	At1g08210	0.000202415	0.114687	0.0324228	0.297634	0.509071	0.0261814		0.000202415	NS	NS		4.72513	5.18744	4.98286	4.77314		hypothetical protein similar to putative protease GI:4415912 from [Arabidopsis thaliana]; supported by cDNA: gi_11993876_gb_AF329505.1_AF329505
261784_at	At1g08220	0.000739952	0.747216	0.000783426	0.263047	0.00126609	0.119621		0.000739952	0.000783426	0.00126609		4.77723	4.48724	4.47097	4.50434		hypothetical protein predicted by genemark.hmm
261785_at	At1g08230	0.482407	0.840954	0.956911	0.369256	0.589074	0.68933		NS	NS	NS		3.55226	3.66829	3.54452	3.63455		hypothetical protein contains similarity to amino acid permease GI:7415521 from [Oryza sativa]
261758_at	At1g08250	0.00105801	0.0616543	0.0237518	0.586795	0.23726	0.53311		0.00105801	NS	NS		5.43816	5.07966	5.14425	5.33473		hypothetical protein contains similarity to prephenate dehydratase GI:1008717 from [Amycolatopsis methanolica]; supported by cDNA: gi_15810502_gb_AY056290.1_
261811_at	At1g08260	0.227698	0.3799	0.274675	0.640224	0.165684	0.305854		NS	NS	NS		3.34092	3.43188	3.40066	3.44452		DNA polymerase epsilon catalytic subunit, putative similar to DNA polymerase epsilon catalytic subunit GI:5565875 from [Mus musculus]
261812_at	At1g08270	0.40387	0.605668	0.476383	0.360073	0.945623	0.574688		NS	NS	NS		3.47153	3.5574	3.40248	3.47942		hypothetical protein contains similarity to vacuolar protein sorting factor 4B GI:9885650 from [Homo sapiens]
261813_at	At1g08280	0.013268	0.259244	0.0100566	0.61239	0.00995491	0.560708		NS	NS	NS		4.6962	4.33596	4.29715	4.3506		hypothetical protein contains similarity to alpha2,8-sialyltransferase GI:929684 from [Mus musculus]
261814_at	At1g08310	0.756768	0.127702	0.302008	0.408475	0.0216225	0.194764		NS	NS	NS		3.4335	3.41731	3.48582	3.32296		unknown protein
261756_at	At1g08320	0.168487	0.0140223	0.710271	0.0263011	0.467524	0.595986		NS	NS	NS		4.59946	4.6886	4.57318	4.67135		Expressed protein ; supported by full-length cDNA: Ceres: 40238.
261815_at	At1g08325	0.133243	0.138495	0.362284	0.322728	0.689485	0.971536		NS	NS	NS		3.85858	4.00065	3.94878	3.83182		leucine zipper protein, putative similar to basic leucine zipper protein GI:2865394 from [Zea mays]
261809_at	At1g08340	0.0535438	0.333349	0.448437	0.10219	0.352605	0.709316		NS	NS	NS		3.59123	3.44195	3.51029	3.52469		rac GTPase activating protein, putative similar to rac GTPase activating protein 1 GI:3695059 from [Lotus japonicus]
261747_at	At1g08350	0.593286	0.780602	0.994359	0.953442	0.900817	0.383689		NS	NS	NS		4.37021	4.47339	4.36897	4.3927		unknown protein similar to putative endosomal protein GB:AAD20090 GI:4406780 from [Arabidopsis thaliana]; supported by cDNA: gi_15010757_gb_AY045680.1_
261694_at	At1g08360	0.968993	0.810341	0.409296	0.697115	0.0369207	0.0331228		NS	NS	NS		9.3639	9.36581	9.31398	9.23387		60S ribosomal protein L10A, putative similar to 60S ribosomal protein L10A GB:AAC73045 GI:3860277 from [Arabidopsis thaliana]; supported by cDNA: gi_15810664_gb_AY056371.1_
261693_at	At1g08370	0.565165	0.985225	0.967088	0.0138234	0.899778	0.307856		NS	NS	NS		5.95909	5.90479	5.96233	5.97643		hypothetical protein similar to hypothetical protein GB:AAC17938 GI:3169719 from [Arabidopsis thaliana]; supported by cDNA: gi_3169718_gb_AF007109.1_AF007109
261746_at	At1g08380	0.0212874	0.216758	0.022234	0.767442	0.0342607	0.162759		NS	NS	NS		12.8069	12.8754	12.8684	12.8806		unknown protein ;supported by full-length cDNA: Ceres:34623.
261742_at	At1g08390	0.000717791	0.800886	0.000373163	0.127113	0.000814103	0.170902		0.000717791	0.000373163	0.000814103		4.58028	5.14971	5.14379	5.06754		hypothetical protein predicted by genemark.hmm
261743_s_at	At1g08420	0.147279	0.381745	0.176153	0.0536102	0.177412	0.470011		NS	NS	NS		3.85096	3.64758	3.67406	3.67459		protein serine/threonine phosphatase alpha, putative similar to protein serine/threonine phosphatase alpha GB:AAC69437 GI:3811109 from [Plasmodium falciparum]
257481_at	At1g08430	0.541705	0.283756	0.00790264	0.873765	0.0171383	0.538317		NS	NS	NS		3.07112	3.02066	2.89844	2.92513		hypothetical protein identical to hypothetical protein GB:AAF22890 GI:6664308 from [Arabidopsis thaliana]
261692_at	At1g08450	0.0866232	0.373636	0.585717	0.604242	0.219157	0.568988		NS	NS	NS		8.03348	7.58357	8.18106	7.67321		calreticulin, putative similar to calreticulin GB:AAC49697 GI:2052383 from [Arabidopsis thaliana]; supported by cDNA: gi_2052382_gb_U66345.1_ATU66345
261720_at	At1g08460	0.00905682	0.410847	1.89899e-05	0.140711	5.17477e-05	0.010017		NS	1.89899e-05	5.17477e-05		6.82203	7.14561	7.24693	7.19338		hypothetical protein similar to hypothetical protein GB:AAF22892 GI:6664310 from [Arabidopsis thaliana]; supported by cDNA: gi_15294161_gb_AF410272.1_AF410272
261696_at	At1g08470	0.00630608	0.229542	0.0530016	0.091355	0.14738	0.311112		NS	NS	NS		6.48555	6.33172	6.38751	6.31142		unknown protein similar to hypothetical protein GB:AAF22901 GI:6664319 from [Arabidopsis thaliana]; supported by cDNA: gi_16930480_gb_AF419594.1_AF419594
261721_at	At1g08480	0.0207383	0.0208686	0.18924	0.206326	0.775945	0.410972		NS	NS	NS		8.31806	8.18377	8.25752	8.30662		unknown protein ; supported by cDNA: gi_15450426_gb_AY052314.1_
261744_at	At1g08490	0.0682885	0.286755	0.435505	0.28532	0.603034	0.310672		NS	NS	NS		6.4209	6.30811	6.37944	6.38501		nitrogen fixation protein (nifS), putative similar to nitrogen fixation protein (nifS) GB:D64004 GI:1001701 from [Synechocystis sp]
261745_at	At1g08500	0.0152184	0.88426	0.21311	0.705905	0.112023	0.579644		NS	NS	NS		5.47598	5.8006	5.61632	5.69244		unknown protein identical to unknown protein GB:AAC32929 GI:3395758 from [Arabidopsis thaliana];supported by full-length cDNA: Ceres:123625.
261722_at	At1g08510	0.0012051	0.821889	0.00673276	0.193819	0.000331626	0.0792014		0.0012051	NS	0.000331626		9.0003	8.77834	8.84827	8.74551		acyl-(acyl carrier protein) thioesterase, putative almost identical to acyl-(acyl carrier protein) thioesterase GB:CAA85387 GI:634003 from [Arabidopsis thaliana]; supported by cDNA: gi_15451197_gb_AY054679.1_
261695_at	At1g08520	0.0896289	0.80311	0.484373	0.719093	0.219349	0.528893		NS	NS	NS		9.06858	9.30205	9.15546	9.24474		Mg-chelatase, putative similar to Mg-chelatase GB:AF014399 GI:2318116 from [Pisum sativum]; supported by cDNA: gi_16649072_gb_AY059906.1_
264781_at	At1g08540	0.550266	0.233451	0.949456	0.619956	0.883619	0.315097		NS	NS	NS		8.50023	8.45283	8.49355	8.48943		putative plastid RNA polymerase sigma-subunit similar to GB:BAA22427 and EST gb|N65838; supported by cDNA: gi_2353172_gb_AF015543.1_AF015543
264799_at	At1g08550	0.0344611	0.565232	0.0378571	0.216369	0.000511125	0.808398		NS	NS	0.000511125		9.34664	9.65043	9.54062	9.71336		putative violaxanthin de-epoxidase precursor (U44133) similar to EST gb|N37612; supported by cDNA: gi_1465734_gb_U44133.1_ATU44133
264802_at	At1g08560	0.197563	0.574078	0.589176	0.570267	0.613704	0.400867		NS	NS	NS		4.59131	4.39514	4.52203	4.52955		putative syntaxin-related protein (U39451) BAC F22O13 has a deletion of a cytosine at position 7887; supported by cDNA: gi_1184164_gb_U39451.1_ATU39451
264779_at	At1g08570	0.465092	0.651978	0.761207	0.87068	0.10321	0.60152		NS	NS	NS		7.62188	7.50478	7.57702	7.89051		putative thioredoxin similar to ESTs gb|T46281, gb|R83933, gb|N65879, emb|F14466, gb|N96726, gb|AA042340, and emb|Z18150; supported by cDNA: gi_14334493_gb_AY034938.1_
264803_at	At1g08580	0.00317958	0.851304	0.00179507	0.0410983	0.0167655	0.0259779		NS	NS	NS		5.53382	5.09085	5.15452	5.33829		hypothetical protein predicted by genscan
264804_at	At1g08590	0.437112	0.833166	0.407482	0.638788	0.404696	0.204956		NS	NS	NS		3.9547	3.86909	3.86367	4.05382		putative receptor kinase, CLV1 similar to receptor-like protein kinase (Ipomoea nil) (U77888)
264805_at	At1g08600	0.816421	0.945569	0.069204	0.499284	0.431699	0.527905		NS	NS	NS		4.06554	4.10457	4.31263	4.16385		unknown protein similar to putative DNA dependent ATPase and helicase
264806_at	At1g08610	0.67327	0.314502	0.1476	0.23471	0.0974874	0.693438		NS	NS	NS		3.99728	3.941	3.74563	3.76131		hypothetical protein predicted by genscan
264792_at	At1g08620	0.795121	0.00540353	0.701958	0.714176	0.546063	0.245101		NS	NS	NS		5.43228	5.45084	5.38508	5.38601		hypothetical protein similar to hypothetical protein GB:CAB45806
264777_at	At1g08630	0.322407	0.666578	0.321411	0.512076	0.442638	0.628082		NS	NS	NS		3.29035	3.36489	3.37039	3.35156		unknown protein similar to L-allo-threonine aldolase (D87890); similar to ESTs gb|R30517, gb|T42772, gb|R90493, and gb|R90493;supported by full-length cDNA: Ceres:271327.
264811_at	At1g08640	0.349009	0.545639	0.39485	0.35259	0.931557	0.750956		NS	NS	NS		7.98969	7.89468	7.90927	7.98089		hypothetical protein predicted by genscan;supported by full-length cDNA: Ceres:35718.
264783_at	At1g08650	0.686761	0.347345	0.481968	0.402122	0.123907	0.676679		NS	NS	NS		5.09617	5.18292	5.24692	5.44103		putative calcium-dependent protein kinase (U90439) similar to ESTs gb|T46119, gb|H76837, and gb|H36948; supported by cDNA: gi_6318612_gb_AF162660.1_AF162660
264793_at	At1g08660	0.883136	0.669382	0.943312	0.875011	0.377944	0.751762		NS	NS	NS		6.27346	6.29318	6.28321	6.12714		unknown protein similar to beta-galactoside alpha-2,3-sialyltransferase (pir|IJC5251)
264794_at	At1g08670	0.732917	0.785936	0.461108	0.0451633	0.838452	0.970516		NS	NS	NS		3.00655	3.03205	2.95994	2.99406		hypothetical protein predicted by genscan
264795_at	At1g08680	0.0191618	0.110388	0.00518368	0.680663	0.00843227	0.0829062		NS	NS	NS		4.36562	4.54611	4.73279	4.66803		unknown protein similar to ESTs emb|Z46294, gb|W43468, and gb|W43475
264796_at	At1g08690	0.00323487	0.386513	0.00345354	0.592661	0.0275966	0.0792125		NS	NS	NS		5.69229	6.14252	6.09066	5.95037		unknown protein similar to ESTs gb|T20593 and emb|Z35049
264807_at	At1g08700	0.984465	0.430454	0.439091	0.939997	0.80742	0.331314		NS	NS	NS		5.43109	5.42899	5.34966	5.46265		putative presenilin similar to presenilin GB:AAD23630;supported by full-length cDNA: Ceres:43026.
264797_at	At1g08710	0.0688363	0.478781	0.519509	0.473967	0.540802	0.542453		NS	NS	NS		3.80367	4.00005	3.87625	3.86305		unknown protein similar to ESTs gb|T22270 and gb|T76886
264780_at	At1g08720	0.607072	0.96346	0.901398	0.37733	0.186604	0.881862		NS	NS	NS		4.93341	4.88256	4.9457	5.13941		putative protein kinase similar to MAP3K delta-1 protein kinase (Y14199); supported by cDNA: gi_11127924_gb_AF305913.1_AF305913
264798_at	At1g08730	0.155622	0.0887318	0.910017	0.385488	0.364909	0.36029		NS	NS	NS		3.75954	3.88378	3.76906	3.85145		putative myosin MYA1, class V (Z28389) similar to ESTs gb|R30087 and gb|AA394762
264810_at	At1g08750	0.598925	0.799906	0.146637	0.0612957	0.341248	0.0345819		NS	NS	NS		5.53494	5.48595	5.63045	5.45893		putative GPI-anchor transamidase (U32517) similar to GB:P49018;supported by full-length cDNA: Ceres:120167.
264808_at	At1g08770	0.931307	0.561042	0.0704615	0.32504	0.428352	0.186134		NS	NS	NS		5.76947	5.77591	5.91353	5.86576		unknown protein similar to EST gb|H37293;supported by full-length cDNA: Ceres:7188.
264778_at	At1g08780	0.464007	0.310289	0.611151	0.91454	0.833767	0.832255		NS	NS	NS		5.76181	5.82455	5.81037	5.77994		unknown protein similar to C-1 (Homo sapiens) (U41816); supported by full-length cDNA: Ceres: 20276.
264800_at	At1g08800	0.0305707	0.814419	0.0283334	0.529306	0.0226884	0.0868371		NS	NS	NS		3.57615	3.86282	3.78858	3.82497		hypothetical protein similar to IFA-binding protein GB:AAD01202
264782_at	At1g08810	0.0673185	0.565312	0.368805	0.755384	0.0630054	0.960499		NS	NS	NS		3.81817	4.13539	3.95509	4.13101		putative transcription factor similar to GB:AAC83617 and myb proteins; supported by cDNA: gi_3941481_gb_AF062895.1_AF062895
264809_at	At1g08830	0.0311123	0.962055	0.809724	0.405264	0.90979	0.210419		NS	NS	NS		8.60259	9.67788	8.67737	8.64424		superoxidase dismutase identical to GB:P24704;supported by full-length cDNA: Ceres:33493.
264801_at	At1g08840	0.75321	0.447995	0.877187	0.498803	0.294865	0.945002		NS	NS	NS		4.49028	4.53103	4.50813	4.35665		hypothetical protein gene overlaps Sp6 end of F7G19
264646_at	At1g08860	0.708836	0.43757	0.812879	0.418857	0.850268	0.443347		NS	NS	NS		3.63121	3.58056	3.59841	3.60567		hypothetical protein Similar to Homo copine I (gb|U83246)
264651_at	At1g08880	0.265648	0.39368	0.0778881	0.403964	0.0647835	0.23006		NS	NS	NS		8.14399	8.081	7.97116	8.27649		putative histone H2A Strong similarity to Picea histone H2A (gb|X67819). ESTs gb|ATTS3874,gb|T46627,gb|T14194 come from this gene;supported by full-length cDNA: Ceres:39667.
264654_s_at	At1g08900	0.519257	0.589951	0.553282	0.528877	0.827168	0.683424		NS	NS	NS		5.97349	5.87613	5.88494	6.01115		putative sugar transport protein, ERD6 similar to GB:BAA25989; supported by cDNA: gi_14423387_gb_AF386931.1_AF386931
264652_at	At1g08920	0.00488825	0.813108	0.00555026	0.563035	0.0319316	0.120702		NS	NS	NS		4.61137	5.19868	5.29831	5.08305		putative sugar transport protein, ERD6 similar to GB:BAA25989; supported by cDNA: gi_14194108_gb_AF367260.1_AF367260
264624_at	At1g08930	0.0470302	0.57309	0.245487	0.709415	0.0157284	0.913391		NS	NS	NS		8.54249	8.11788	8.27079	7.99325		zinc finger protein ATZF1, putative identical to GB:BAA25989; supported by cDNA: gi_3123711_dbj_D89051.1_D89051
264645_at	At1g08940	0.024492	0.886429	0.242853	0.709744	0.0177334	0.493137		NS	NS	NS		4.03449	4.32966	4.22202	4.32699		unknown protein Similar to Saccharomyces hypothetical protein YDR051c (gb|Z49209). ESTs gb|T44436,gb|42252 come from this gene
264644_at	At1g08960	0.327744	0.672756	0.0744643	0.924201	0.352298	0.0447007		NS	NS	NS		5.48133	5.31522	5.21445	5.36079		hypothetical protein Similar to Caenorhabditis hypothetical protein CO7A9.11 (gb|Z29094)
264650_at	At1g08970	0.879308	0.387343	0.302266	0.551407	0.174955	0.666794		NS	NS	NS		7.30705	7.29536	7.23317	7.44998		putative transcription factor Similar to Schizosaccharomyces CCAAT-binding factor (gb|U88525). EST gb|T04310 comes from this gene;supported by full-length cDNA: Ceres:1911.
264653_at	At1g08980	0.000455177	0.864298	0.000248054	0.361751	0.000271912	0.430124		0.000455177	0.000248054	0.000271912		8.2096	8.6312	8.54717	8.65274		unknown protein Contains similarity to Rhodococcus amidase (gb|D16207). ESTs gb|T20504,gb|H36650,gb|N97423,gb|H36595 come from this gene; supported by cDNA: gi_14335037_gb_AY037198.1_
264643_at	At1g08990	0.0999309	0.889218	0.618067	0.722305	0.909892	0.480715		NS	NS	NS		3.21154	3.09727	3.23917	3.20028		unknown protein
264623_at	At1g09000	0.910356	0.220497	0.499373	0.605468	0.647712	0.974849		NS	NS	NS		3.52671	3.53617	3.45879	3.56235		putative NPK1-related protein kinase 2 Similar to Nicotiana protein kinase (gb|D26601); supported by cDNA: gi_2342422_dbj_AB000797.1_AB000797
264656_at	At1g09010	0.00931303	0.207045	0.000137434	0.468883	5.95306e-05	0.118728		NS	0.000137434	5.95306e-05		6.77056	7.03108	7.10331	7.18817		unknown protein Contains similarity to Bos beta-mannosidase (gb|U46067); supported by cDNA: gi_15028222_gb_AY045934.1_
264625_at	At1g09020	0.79365	0.661793	0.721753	0.138962	0.508801	0.809409		NS	NS	NS		4.07762	4.10491	4.12373	3.9831		hypothetical protein Contains similarity to Rattus AMP-activated protein kinase (gb|X95577); supported by cDNA: gi_9965728_gb_AF250335.1_AF250335
264642_at	At1g09030	0.449733	0.00476509	0.304449	0.358091	0.547805	0.13212		NS	NS	NS		3.28639	3.33644	3.20451	3.2474		putative CCAAT-binding transcription factor subunit A Strong similarity to Arabidopsis CCAAT-binding factor (gb|Z97336)
264649_at	At1g09060	0.573069	0.467777	0.635434	0.550461	0.116009	0.286823		NS	NS	NS		5.79946	5.86859	5.8488	5.9918		hypothetical protein Similar to Vicia sativa ENBP1 (gb|X95995
264655_at	At1g09070	0.957771	0.484764	0.724575	0.830696	0.49603	0.783811		NS	NS	NS		8.61662	8.60349	8.52627	8.44187		unknown protein Similar to Glycine SRC2 (gb|AB000130). ESTs gb|H76869,gb|T21700,gb|ATTS5089 come from this gene; supported by cDNA: gi_15010557_gb_AY045580.1_
264648_at	At1g09080	0.944848	0.670974	0.524369	0.259177	0.65245	0.887073		NS	NS	NS		3.27888	3.28511	3.3282	3.24084		putative luminal binding protein Similar to Arabidopsis luminal binding protein (gb|D89342)
264647_at	At1g09090	0.702667	0.747282	0.0635203	0.803168	0.0765464	0.233862		NS	NS	NS		2.80231	2.78766	2.89078	2.89061		putative respiratory burst oxidase protein B Strong similarity to Oryza NADPH oxidase (gb|X93301)
264657_at	At1g09100	0.562597	0.475552	0.814518	0.449996	0.59121	0.686073		NS	NS	NS		5.51356	5.6179	5.55387	5.62934		putative 26S protease regulatory subunit 6A Similar to probable Mg-dependent ATPase (pir|S56671). ESTs gb|T46782,gb|AA04798 come from this gene; supported by cDNA: gi_15215787_gb_AY050423.1_
264641_at	At1g09130	0.992999	0.256241	0.926809	0.46913	0.292731	0.90292		NS	NS	NS		9.20275	9.20343	9.20966	9.28813		ATP-dependent Clp protease proteolytic subunit (ClpR3), putative similar to nClpP5 GI:5360595 from [Arabidopsis thaliana]
264255_at	At1g09140	0.0185405	0.834384	0.0106117	0.687044	0.120021	0.798989		NS	NS	NS		5.96425	6.15759	6.12266	6.06252		putative SF2/ASF splicing modulator, Srp30 similar to GB:CAB42558
264254_at	At1g09150	0.0434445	0.276132	0.24295	0.696306	0.0243231	0.575525		NS	NS	NS		6.67816	6.92368	6.82325	6.94768		unknown protein
264263_at	At1g09155	0.0208418	0.76006	0.0163971	0.000118807	0.15192	0.481852		NS	NS	NS		2.97261	3.09534	3.03241	2.88128		Expressed protein ; supported by full-length cDNA: Ceres: 31022.
264266_at	At1g09160	0.000204545	0.25668	2.37713e-05	0.523744	0.00331794	0.373252		0.000204545	2.37713e-05	NS		5.53086	5.16683	5.05922	5.03914		putative protein phosphatase 2C similar to GB:AAC16260; supported by cDNA: gi_16930414_gb_AF419561.1_AF419561
264253_at	At1g09170	0.052283	0.604226	0.275153	0.234071	0.574193	0.272805		NS	NS	NS		3.22758	3.416	3.14222	3.28181		putative kinesin similar to GB:AAB61066
264252_at	At1g09180	0.378245	0.63117	0.709417	0.22403	0.550693	0.432289		NS	NS	NS		4.06822	4.15252	4.09704	4.10928		putative GTP-binding protein, SAR1B similar to GB:Q01474
264251_at	At1g09190	0.128386	0.808285	0.341734	0.0478871	0.744633	0.386867		NS	NS	NS		3.8454	3.96244	3.77408	3.82213		hypothetical protein identical to GB:AAC24086 which contains similarity to a membrane-associated salt-inducible protein
264262_at	At1g09200	0.00159249	0.597676	0.0170604	0.753381	0.0412016	0.186335		0.00159249	NS	NS		7.84888	7.20158	7.233	7.48404		Expressed protein ; supported by full-length cDNA: Ceres: 10388.
264260_at	At1g09210	0.629019	0.511579	0.873446	0.867509	0.37759	0.421127		NS	NS	NS		7.97839	7.91663	7.95427	7.84814		putative calcium-binding protein, calreticulin similar to GB:AAA80652;supported by full-length cDNA: Ceres:27210.
264258_at	At1g09220	0.0262717	0.140863	0.126982	0.505511	0.328063	0.866654		NS	NS	NS		3.17269	3.29636	3.07282	3.11239		hypothetical protein predicted by genefinder
264257_at	At1g09230	0.145152	0.569666	0.159814	0.907414	0.352347	0.980361		NS	NS	NS		3.94778	4.29552	4.28714	4.15816		unknown protein
264261_at	At1g09240	0.622716	0.744555	0.377924	0.817259	0.14641	0.0320857		NS	NS	NS		4.31809	4.41999	4.13394	4.57634		putative nicotianamine synthase similar to GB:BAA74589;supported by full-length cDNA: Ceres:37124.
264264_at	At1g09250	0.700866	0.732271	0.923389	0.300702	0.159334	0.605474		NS	NS	NS		4.99082	4.92585	4.97565	4.73537		unknown protein ESTs gb|T04610, gb|N38459, gb|T45174, gb|R30481 and gb|N64971 come from this gene;supported by full-length cDNA: Ceres:9228.
264256_at	At1g09270	0.635065	0.7097	0.270218	0.374798	0.0722634	0.898157		NS	NS	NS		6.36128	6.32641	6.47955	6.21468		putative importin alpha similar to GB:AAC27644 and GB:CAA74966
264265_at	At1g09280	0.168911	0.275746	0.476439	0.810596	0.281707	0.528707		NS	NS	NS		5.69752	5.80944	5.61514	5.81692		unknown protein ; supported by cDNA: gi_15081790_gb_AY048288.1_
264259_at	At1g09290	0.989814	0.829477	0.2456	0.748552	0.827465	0.92113		NS	NS	NS		3.73793	3.73697	3.86519	3.71783		hypothetical protein This gene is continued on the 5 end of BAC T12M14
263707_at	At1g09300	0.0642282	0.950888	0.374296	0.423594	0.843106	0.0934993		NS	NS	NS		3.70627	3.52303	3.60151	3.69073		hypothetical protein Similar to gi|1573829 HI0816 aminopeptidase P homolog (pepP) from Haemophilus influenzae genome gb|U32764
263709_at	At1g09310	0.00283775	0.855323	0.00840332	0.675767	0.0797551	0.624594		NS	NS	NS		12.5391	12.1946	12.1645	12.3322		unknown protein ESTs gb|T20589, gb|T04648, gb|AA597906, gb|T04111, gb|R84180, gb|R65428, gb|T44439, gb|T76570, gb|R90004, gb|T45020, gb|T42457, gb|T20921, gb|AA042762 and gb|AA720210 come from this gene;supported by full-length cDNA: Ceres:11073.
263708_at	At1g09320	0.0352441	0.584059	0.632465	0.38032	0.969852	0.30828		NS	NS	NS		3.92865	4.08771	3.87761	3.93117		unknown protein
263710_at	At1g09330	0.00552604	0.997451	0.0265253	0.483733	0.0190585	0.825455		NS	NS	NS		7.63575	7.32679	7.34395	7.39293		unknown protein ;supported by full-length cDNA: Ceres:14886.
263676_at	At1g09340	0.00369211	0.0169523	0.0264076	0.977258	0.0105875	0.507109		NS	NS	NS		10.7326	10.4934	10.4906	10.5578		putative RNA-binding protein Identical to gb|Y10557 g5bf gene from Arabidopsis thaliana. ESTs gb|R30578, gb|R90475, gb|T22384, gb|T22425, gb|N64934 and gb|T46767 come from this gene;supported by full-length cDNA: Ceres:37028.
264511_at	At1g09350	0.00467166	0.113102	0.0139191	0.456183	1.78496e-06	0.883747		NS	NS	1.78496e-06		5.24743	6.83293	6.27421	7.53961		putative galactinol synthase similar to GB:AAD26116 from [Brassica napus]; supported by cDNA: gi_13899102_gb_AF370546.1_AF370546
264555_at	At1g09360	0.506118	0.495064	0.0549523	0.487852	0.452474	0.64289		NS	NS	NS		3.50337	3.57121	3.35179	3.44944		hypothetical protein predicted by genscan
264500_at	At1g09370	0.285227	0.460312	0.0824093	0.0662268	0.419045	0.84512		NS	NS	NS		2.75487	2.82156	2.87075	2.82823		hypothetical protein predicted by genefinder
264505_at	At1g09380	0.399075	0.810453	0.870524	0.258592	0.348776	0.738754		NS	NS	NS		3.56307	3.45251	3.59146	3.68426		putative nodulin protein, N21 Similar to MtN21, gi|2598575, Megicago truncatula nodulation induced gene; supported by full-length cDNA: Ceres: 39581.
264501_at	At1g09390	0.0420531	0.648238	0.00192425	0.445835	6.52717e-05	0.649785		NS	NS	6.52717e-05		5.02758	5.4386	5.437	5.56524		putative lipase Similar to nodulins and lipase; location of EST E6C2T7 , gb|AA042309. similar to nodulins gi|3328240, gi|2129854 and others and lipase, gi|2129636
264502_at	At1g09400	0.464746	0.151211	0.608238	0.278959	0.36143	0.429959		NS	NS	NS		3.15331	3.23785	3.18055	3.10403		putative 12-oxophytodienoate reductase OPR1 Similar to 12-oxophytodienoate reductase, gi|2765083 and old-yellow-enzyme homolog, gi|2232254
264503_at	At1g09410	0.246551	0.219618	0.718358	0.831448	0.846687	0.180441		NS	NS	NS		3.26558	3.42141	3.31873	3.23974		hypothetical protein Similar to Arabidopsis selenium-binding protein, gi|2244760 and Arabidopsis hypothetical proteins gi|3033399, gi|2464864, gi|2244839 and several others
264507_at	At1g09415	0.0635533	0.651388	0.0644412	0.785108	0.282235	0.669543		NS	NS	NS		5.46207	6.00048	6.02165	5.71548		Expressed protein ; supported by cDNA: gi_14423419_gb_AF386947.1_AF386947
264513_at	At1g09420	0.223931	0.768356	0.201228	0.885428	0.293701	0.757526		NS	NS	NS		4.67073	3.81612	3.77364	3.94784		putative glucose-6-phosphate dehydrogenase Similar to gi|2276344, gi|2829880, gi|2352919 and others; Location of EST gb|N37552, gc exon splice site at 20574 is based on protein alignment, and is not confirmed experimentally; supported by cDNA: gi_15810386_gb_AY056232.1_
264504_at	At1g09430	0.00613677	0.142975	0.0300316	0.525656	0.184243	0.950402		NS	NS	NS		7.43156	7.67656	7.69998	7.58285		unknown protein similar to ATP-citrate-lyase; Location of EST gb|Z34587. Highly similar to F8A5.32, gb|2462746 and similar to ATP-citrate-lyase, gi|113116
264549_at	At1g09440	0.940481	0.191549	0.77474	0.661843	0.858918	0.89263		NS	NS	NS		4.12595	4.13572	4.0939	4.10702		putative ser/thr protein kinase similar to GB:AAD21713
264550_at	At1g09450	0.986745	0.7678	0.0136076	0.0235108	0.488371	0.361078		NS	NS	NS		3.40269	3.40369	3.29277	3.4736		hypothetical protein predicted by genscan
264551_at	At1g09460	0.707838	0.323085	0.398995	0.0563834	0.896347	0.202217		NS	NS	NS		3.39802	3.38084	3.36273	3.40529		unknown protein similar to beta-1,3-glucanase GB:AAD22663, location of EST 192N12T7, gb|R90355
264552_at	At1g09470	0.37319	0.539333	0.0605128	0.235701	0.105865	0.877625		NS	NS	NS		3.75276	3.65899	3.53326	3.5606		hypothetical protein predicted by genscan
264553_s_at	At1g09480	0.0488902	0.131539	0.14326	0.213013	0.741383	0.931867		NS	NS	NS		5.19406	4.9835	5.07012	5.23349		putative cinnamyl alcohol dehydrogenase similar to cinnamyl alcohol dehydrogenase, gi|1143445
264514_at	At1g09500	0.0474568	0.889882	0.776498	0.272323	0.279142	0.808575		NS	NS	NS		3.06562	2.95433	3.04219	3.01938		putative cinnamyl alcohol dehydrogenase similar to cinnamyl alcohol dehydrogenase, gi|1143445; supported by cDNA: gi_15983385_gb_AF424567.1_AF424567
264554_at	At1g09510	0.770067	0.469249	0.134463	0.197583	0.0723739	0.275688		NS	NS	NS		3.21456	3.19205	3.09188	3.06886		putative cinnamyl alcohol dehydrogenase similar to cinnamyl alcohol dehydrogenase, gi|1143445
264509_at	At1g09520	0.769751	0.0559547	0.975525	0.719893	0.442309	0.0664594		NS	NS	NS		4.90643	4.93737	4.90287	4.99147		unknown protein Location of EST gb|Z34586 and gb|Z34166; supported by cDNA: gi_15529271_gb_AY052260.1_
264510_at	At1g09530	0.0209376	0.895149	0.0109889	0.0338234	0.000131245	0.719371		NS	NS	0.000131245		4.53662	4.86578	4.85485	5.1786		putative phytochrome-associated protein 3 similar to GB:AAC99771; supported by cDNA: gi_3929585_gb_AF100166.1_AF100166
264556_at	At1g09540	0.591388	0.109954	0.566126	0.679586	0.301426	0.345055		NS	NS	NS		3.50054	3.54021	3.55728	3.5736		putative transcription factor contains Myb DNA-binding domain motif, 68157-68216. Similar to Arabidopsis thaliana transcription factor ATMYB4, gi|3047079
264557_at	At1g09550	0.277134	0.427321	0.518057	0.957054	0.333345	0.818339		NS	NS	NS		3.45669	3.60669	3.53488	3.59286		putative pectinacetylesterase precursor similar to Vigna radiata pectinacetylesterase precursor, gi|1431629
264506_at	At1g09560	0.804506	0.40129	0.110842	0.766888	0.920831	0.974934		NS	NS	NS		6.45444	6.53931	6.8762	6.43158		germin-like protein Identical to Arabidopsis germin-like protein, gi|1755178. Location of EST 180L10T7, gi|906417; supported by cDNA: gi_13265455_gb_AF324678.2_AF324678
264508_at	At1g09570	0.000780158	0.523343	0.00935364	0.955903	0.00175178	0.250303		0.000780158	NS	0.00175178		6.25437	7.14123	7.00124	7.01594		putative phytochrome A similar to GB:AAA21351; supported by cDNA: gi_14517371_gb_AY039520.1_
264512_at	At1g09575	0.212738	0.38398	0.127362	0.33012	0.121615	0.765098		NS	NS	NS		3.8369	3.72751	3.69602	3.69109		Expressed protein ; supported by cDNA: gi_15810220_gb_AY056149.1_
264558_at	At1g09600	0.906513	0.142244	0.232681	0.950901	0.469846	0.664498		NS	NS	NS		3.46543	3.47691	3.40885	3.40096		putative protein kinase Similar to cdc2 protein kinases
264559_at	At1g09610	0.123096	0.0306184	0.0733388	0.704066	0.00331631	0.0303729		NS	NS	NS		3.14347	3.21079	3.28955	3.32434		unknown protein similar to hypothetical protein GB:CAB39623
264705_at	At1g09620	0.488414	0.350771	0.291078	0.309741	0.535144	0.600111		NS	NS	NS		6.78514	6.71905	6.6853	6.71264		putative leucyl-tRNA synthetase Strong similarity to S. pombe leucyl-tRNA synthetase (gb|Z73100)
264669_at	At1g09630	0.00257973	0.29444	0.0944046	0.834411	0.408733	0.276828		NS	NS	NS		6.60235	6.09841	6.34961	6.49883		putative RAS-related protein, RAB11C Strong similarity to A. thaliana ara-2 (gb|ATHARA2). ESTs gb|ATTS2483,gb|ATTS2484,gb|AA042159 come from this gene; supported by full-length cDNA: Ceres: 17081.
264670_s_at	At1g09640	0.835937	0.512242	0.71364	0.200931	0.0424961	0.588598		NS	NS	NS		9.94931	9.93528	9.93184	9.76519		unknown protein Similar to elongation factor 1-gamma (gb|EF1G_XENLA). ESTs gb|T20564,gb|T45940,gb|T04527 come from this gene;supported by full-length cDNA: Ceres:39525.
264664_at	At1g09660	0.158276	0.631239	0.135958	0.729933	0.0616091	0.21757		NS	NS	NS		5.50284	5.2532	5.28729	5.15266		putative elongation factor similar to GB:AAC67357
264665_at	At1g09670	0.156248	0.678051	0.577721	0.656254	0.426507	0.46111		NS	NS	NS		5.28375	5.06564	5.20475	5.18108		unknown protein ESTs gb|H37208,gb|H36853 come from this gene
264666_at	At1g09680	0.746825	0.158643	0.282811	0.27405	0.242851	0.0543145		NS	NS	NS		4.18814	4.16283	4.29146	4.2744		hypothetical protein Similar to N. tabacum salt-inducible protein (gb|U08285)
264679_s_at	At1g09690	0.00831362	0.411779	0.0485745	0.992844	0.0189058	0.225198		NS	NS	NS		9.20397	8.82842	8.92345	8.86715		putative 60S ribosomal protein L21 Similar to ribosomal protein L21 (gb|L38826). ESTs gb|AA395597,gb|ATTS5197 come from this gene; supported by cDNA: gi_16649106_gb_AY059923.1_
264677_at	At1g09700	0.417706	0.208914	0.887869	0.759255	0.869011	0.286992		NS	NS	NS		3.19916	3.13298	3.18835	3.21129		hypothetical protein predicted by genefinder; supported by cDNA: gi_15451101_gb_AY054631.1_
264706_at	At1g09720	0.529943	0.85827	0.0202696	0.792775	0.11194	0.000272783		NS	NS	NS		2.86917	2.92311	2.77769	2.92824		hypothetical protein predicted by genscan
264707_at	At1g09730	0.935851	0.243508	0.474898	0.846488	0.781243	0.635304		NS	NS	NS		5.29591	5.30406	5.35438	5.32552		unknown protein
264708_at	At1g09740	0.134128	0.155418	0.392551	0.809114	0.307154	0.780762		NS	NS	NS		5.03358	5.21284	5.14032	5.26008		putative ER6 protein similar to GB:AAD46412 from [Lycopersicon esculentum], ESTs gb|ATTS1236,gb|T43334,gb|N97019,gb|AA395203 come from this gene
264672_at	At1g09750	0.0175776	0.976956	0.457289	0.252133	0.616444	0.954967		NS	NS	NS		9.45111	9.79816	9.55222	9.52387		hypothetical protein predicted by genscan;supported by full-length cDNA: Ceres:6295.
264678_at	At1g09760	0.815673	0.954181	0.248811	0.956267	0.563249	0.215488		NS	NS	NS		5.79388	5.76558	5.96708	5.8751		putative U2 small nuclear ribonucleoprotein A (U2 SNRNP-A) Identical to A. thaliana U2 SnRNP-specific A protein (gb|X69137). ESTs gb|ATTS0705, gb|ATTS0339 come from this gene; supported by cDNA: gi_16649064_gb_AY059902.1_
264709_at	At1g09770	0.000490723	0.178233	0.00933162	0.832931	0.0209412	0.994433		0.000490723	NS	NS		6.13713	6.5426	6.43281	6.33955		putative DNA-binding protein, Myb Identical to A. thaliana Myb-like protein (gb|D58424); supported by cDNA: gi_1747309_dbj_D58424.1_D58424
264668_at	At1g09780	0.000174881	0.485105	0.00451612	0.253231	0.0322782	0.84467		0.000174881	NS	NS		8.35271	7.95469	8.05686	8.17434		putative 2,3-bisphosphoglycerate-independent phosphoglycerate mutase Strong similarity to R. communis phosphoglycerate mutase (gb|X70652). ESTs gb|T41853,gb|T76648 come from this gene;supported by full-length cDNA: Ceres:22067.
264710_at	At1g09790	0.563279	0.764175	0.302929	0.453842	0.99081	0.72645		NS	NS	NS		3.5628	3.47737	3.433	3.56128		putative phytochelatin synthetase similar to GB:CAA07251
264673_at	At1g09795	0.0803138	0.203691	0.49989	0.380045	0.371725	0.210248		NS	NS	NS		7.6763	7.53846	7.62142	7.59232		Expressed protein ; supported by full-length cDNA: Ceres: 6319.
264711_at	At1g09800	0.208365	0.642993	0.27882	0.127351	0.594734	0.626759		NS	NS	NS		4.20044	4.02459	4.04522	4.13052		hypothetical protein predicted by genscan
264712_at	At1g09810	0.635112	0.0515783	0.0703595	0.195628	0.0737825	0.332526		NS	NS	NS		3.60705	3.57666	3.48945	3.50198		unknown protein
264674_at	At1g09815	0.00541188	0.55172	0.191035	0.170526	0.933856	0.0801654		NS	NS	NS		6.38302	6.21223	6.31386	6.39334		Expressed protein ; supported by full-length cDNA: Ceres: 6642.
264713_at	At1g09820	0.212269	0.066253	0.0383969	0.0812179	0.0188261	0.902735		NS	NS	NS		4.17138	4.11159	4.01808	4.03726		hypothetical protein Similar to N. tabacum salt-inducible protein (gb|U08285)
264675_at	At1g09830	0.133121	0.0710245	0.824373	0.514483	0.987978	0.842285		NS	NS	NS		6.14611	5.98485	6.12509	6.14467		putative phosphoribosylglycinamide synthetase Identical to A. thaliana PUR2 (gb|X74766). ESTs gb|ATTS3927,gb|N96446 come from this gene; supported by cDNA: gi_15292772_gb_AY050820.1_
264686_at	At1g09840	0.13747	0.554703	0.143083	0.294319	0.0914899	0.38596		NS	NS	NS		6.92566	6.79438	6.78636	6.77748		shaggy-like protien kinase, kappa Identical to A. thaliana AtK-1 (gb|X79279)
264687_at	At1g09850	0.0672659	0.457214	0.0286845	0.0555523	0.0333155	0.623648		NS	NS	NS		7.53915	7.35997	7.29327	7.25164		cysteine protease XBCP3 identical to papain-like cysteine peptidase XBCP3 GI:14600257 from [Arabidopsis thaliana]
264676_at	At1g09870	0.563974	0.245936	0.33781	0.245931	0.141766	0.278009		NS	NS	NS		4.80337	4.87601	4.94177	4.99317		unknown protein EST gb|R64758 comes from this gene; supported by cDNA: gi_15450400_gb_AY052301.1_
264688_at	At1g09890	0.744762	0.598727	0.723128	0.918838	0.804893	0.192722		NS	NS	NS		3.57594	3.61305	3.61668	3.60461		hypothetical protein similar to LG27/30-like gene GB:CAB45078
264689_at	At1g09900	0.283768	0.953113	0.103708	0.248936	0.76377	0.218772		NS	NS	NS		5.65663	5.51793	5.35898	5.61316		hypothetical protein predicted by genscan
264658_at	At1g09910	0.00984565	0.441697	0.00688328	0.793119	0.0386024	0.698778		NS	NS	NS		5.49809	6.01344	5.9693	5.8218		hypothetical protein similar to LG27/30-like gene GB:CAB45078
264671_at	At1g09920	0.877178	0.385134	0.387818	0.105109	0.169154	0.312645		NS	NS	NS		6.06087	6.03879	6.1534	6.26362		unknown protein ; supported by full-length cDNA: Ceres: 4324.
264659_at	At1g09930	0.748332	0.105165	0.0629214	0.429717	0.246196	0.546648		NS	NS	NS		3.61283	3.63008	3.72923	3.7379		unknown protein Similar to S. pombe ISP4 (gb|D83992)
264660_at	At1g09940	0.10336	0.83904	0.324971	0.0672664	0.403432	0.116173		NS	NS	NS		5.05249	5.1501	4.97897	5.10756		putative glutamyl-tRNA reductase 2 precursor similar to GB:P49294 and to A. thaliana HEMA2 (gb|U27118)
264661_at	At1g09950	0.573345	0.644404	0.274132	0.743195	0.397464	0.58926		NS	NS	NS		3.4399	3.34831	3.25774	3.29355		hypothetical protein Similar to Nicotiana tumor-related protein (gb|26453)
264662_at	At1g09960	0.137597	0.781068	0.208139	0.967168	0.828668	0.412007		NS	NS	NS		4.17913	3.98836	4.02519	4.14555		putative sucrose/H+ symporter similar to GB:CAA76367 and Vicia sucrose transport protein (gb|Z93774); supported by cDNA: gi_9957052_gb_AF175321.1_AF175321
264663_at	At1g09970	0.976394	0.266854	0.769677	0.456559	0.0956599	0.995725		NS	NS	NS		6.94815	6.9408	7.01322	6.55488		unknown protein Similar to A. thaliana receptor-like protein kinase (gb|RLK5_ARATH). ESTs gb|ATTS0475,gb|ATTS4362 come from this gene
264667_s_at	At1g09980	0.725412	0.50534	0.707386	0.696845	0.578547	0.140024		NS	NS	NS		6.56362	6.61001	6.61098	6.631		hypothetical protein identical to hypothetical protein GB:AAB60753
264518_at	At1g09990	0.171396	0.356699	0.326206	0.940993	0.864034	0.529276		NS	NS	NS		4.03737	3.9586	4.1124	4.04879		unknown protein
264519_at	At1g10000	0.0370223	0.333924	0.891262	0.463173	0.0818959	0.392314		NS	NS	NS		3.63686	3.88369	3.65095	3.80865		putative reverse transcriptase similar to GB:AAD29058
264520_at	At1g10010	0.747171	0.478492	0.117062	0.484816	0.605243	0.0129402		NS	NS	NS		3.53667	3.51666	3.42952	3.50594		putative amino acid permease GC splice site at position 1256 is predicted from alignment and not confirmed experimentally. Highly similar to Arabidopsis thaliana amino acid permease I gi|404019, and other amino acid permeases
264521_at	At1g10020	0.00493774	0.522823	0.00565093	0.2908	0.392511	0.401853		NS	NS	NS		5.28304	6.07857	6.07207	5.43517		unknown protein Location of EST gb|T41885 and gb|AA395021
264523_at	At1g10030	0.455357	0.725243	0.267288	0.643144	0.464365	0.518125		NS	NS	NS		5.20785	5.06294	5.00173	5.07334		unknown protein Location of EST gb|T45589;supported by full-length cDNA: Ceres:145854.
264522_at	At1g10050	0.447091	0.673311	0.955346	0.367316	0.964357	0.804904		NS	NS	NS		4.20748	4.10681	4.19968	4.21566		putative xylan endohydrolase similar to GB:AAD27896 to endoxylanases gi|1255238 (Thermoanaerobacterium thermosulfurigenes), gi|1813595 (Hordeum vulgare) and others
264525_at	At1g10060	0.154739	0.202587	0.588536	0.0460894	0.0436444	0.610645		NS	NS	NS		5.44523	5.31878	5.4961	5.67825		unknown protein Highly Similar to branched-chain amino acid aminotransferase; Location of EST gb|T21730 and gb|R90237; supported by cDNA: gi_15450873_gb_AY054517.1_
264524_at	At1g10070	0.695287	0.12699	0.782592	0.831514	0.180134	0.881803		NS	NS	NS		3.60845	3.64588	3.5793	3.75526		tat-binding protein, putative Highly Similar to branched-chain amino acid aminotransferase; Location of EST gb|T44177 and gb|AA395381; supported by cDNA: gi_15293208_gb_AY051038.1_
264515_at	At1g10080	0.000486739	0.103567	0.008935	0.891573	0.000443436	0.431398		0.000486739	NS	0.000443436		7.11723	7.47787	7.44255	7.54017		hypothetical protein similar to hypothetical protein GB:S51583
264516_at	At1g10090	0.405091	0.537178	0.276554	0.353115	0.0885832	0.835104		NS	NS	NS		6.81391	6.96391	6.96079	7.17291		unknown protein
257417_at	At1g10110	0.440946	0.0275171	0.925977	0.929755	0.510873	0.580132		NS	NS	NS		3.29554	3.33971	3.29124	3.33802		hypothetical protein predicted by genscan
264517_at	At1g10120	0.0357562	0.506201	0.00768745	0.366495	0.730879	0.283343		NS	NS	NS		4.13043	4.5018	4.67431	4.08598		hypothetical protein predicted by genscan
264526_at	At1g10130	0.465806	0.232855	0.87554	0.583065	0.717444	0.913546		NS	NS	NS		4.94633	4.8533	4.92567	4.88426		putative calcium ATPase very similar to fruit fly Ca2+-transporting ATPase, gi|114306 and fast skeletal muscle Ca-ATPase [Rana esculenta], gi|228912; supported by cDNA: gi_4808839_gb_AF117296.1_AF117296
264467_at	At1g10140	0.0124297	0.80865	0.00568788	0.0537888	0.0117534	0.554264		NS	NS	NS		3.99788	4.49398	4.32184	4.38		unknown protein similar to EST gb|AA598098;supported by full-length cDNA: Ceres:23916.
264463_at	At1g10150	0.0278357	0.936278	0.0428875	0.980505	0.0620414	0.925342		NS	NS	NS		6.40858	6.91658	6.76774	6.74209		unknown protein similar to ESTs gb|T20511, gb|T45308, gb|H36493, and gb|AA651176;supported by full-length cDNA: Ceres:2558.
264459_at	At1g10160	0.0153059	0.0473266	0.747528	0.51327	0.341379	0.730024		NS	NS	NS		3.58581	3.85278	3.61487	3.66622		putative reverse transcriptase similar to GB:AAC78274
264460_at	At1g10170	0.0848045	0.281785	0.00193143	0.048844	0.0904613	0.579053		NS	NS	NS		5.38308	5.57253	5.67006	5.50145		hypothetical protein similar to transcriptional repressor NF-X1 in Homo sapiens (sp|Q12986|NFX1_HUMAN); similar to EST gb|T21002
264407_at	At1g10180	0.81385	0.489637	0.0952818	0.796032	0.253291	0.722084		NS	NS	NS		5.74326	5.76886	5.53383	5.61087		unknown protein similar to EST gb|N96077; supported by cDNA: gi_15810035_gb_AY054286.1_
264462_at	At1g10200	0.267917	0.372209	0.195187	0.788676	0.480206	0.314601		NS	NS	NS		8.75751	8.63841	8.64051	8.69199		putative transcription factor similar to transcription factor SF3 (pir|IS37656); similar to ESTs gb|T42207, gb|N37716, and emb|Z17491;supported by full-length cDNA: Ceres:148790.
264405_at	At1g10210	0.0245751	0.703781	0.22364	0.811883	0.688596	0.217523		NS	NS	NS		4.3992	4.21151	4.52123	4.43819		putative mitogen-activated protein kinase, MAP Kinase 1 similar to ESTs gb|T41567 and gb|R30629; supported by cDNA: gi_464136_dbj_D14713.1_ATHATMPK1
264465_at	At1g10230	0.0136148	0.441306	0.00593194	0.194923	0.0116938	0.670425		NS	NS	NS		4.5927	4.14053	4.21603	4.27057		SKP1/ASK1 (At18), putative similar to Skp1 homolog Skp1a GI:3068807 [Arabidopsis thaliana];supported by full-length cDNA: Ceres:27203.
264408_at	At1g10240	0.192372	0.0889869	0.635146	0.336257	0.059839	0.576364		NS	NS	NS		4.18658	4.31345	4.22455	4.36178		hypothetical protein predicted by genefinder; supported by cDNA: gi_15983441_gb_AF424595.1_AF424595
264450_s_at	At1g10250	0.339237	0.912363	0.870037	0.969693	0.52486	0.465608		NS	NS	NS		3.27449	3.39091	3.29065	3.35375		unknown protein similar to hypothetical protein GB:AAD39330
264451_s_at	At1g10260	0.198125	0.636252	0.896201	0.315275	0.569451	0.088152		NS	NS	NS		2.94592	3.07449	2.95658	2.99361		putative lectin receptor kinase very similar to GB:CAA69271
264452_at	At1g10270	0.383515	0.278863	0.34836	0.367252	0.786405	0.548111		NS	NS	NS		4.40967	4.28695	4.3056	4.37443		unknown protein similar to salt-inducible protein (gi|375717); similar to ESTs gb|R30192 and gb|AA651017
264406_at	At1g10290	0.0578528	0.826594	0.206565	0.612877	0.0683073	0.587229		NS	NS	NS		6.01023	5.79367	5.87862	5.80034		putative phragmoplastin similar to dynamin-like protein phragmoplastin (gi|3341679); similar to ESTs gb|W43823, gb|N37665, gn|R90466, gb|T88406, and gb|N95855; supported by cDNA: gi_6651398_gb_AF180732.1_AF180732
264453_at	At1g10300	0.249787	0.0612275	0.810958	0.515975	0.372418	0.287937		NS	NS	NS		3.07688	3.13319	3.0919	3.16179		putative GTP-binding protein similar to S. cerevisiae Lpg15p (gi|2702365); similar to ESTs gb|AI257432, gb|AA979546, and gb|T04513
264468_at	At1g10310	0.564622	0.645413	0.995883	0.269557	0.913299	0.308372		NS	NS	NS		6.44629	6.40899	6.44655	6.45274		unknown protein similar to daunorubicin C-13 (U77891); similar to oxidoreductase in MRPL44-MTF1 intergenic protein (sp|Q05016|YM71_YEAST; supported by full-length cDNA: Ceres: 40058.
264454_at	At1g10320	0.353568	0.13855	0.0599602	0.957463	0.00635494	0.264701		NS	NS	NS		3.82788	3.94606	3.97012	4.09083		unknown protein similar to U2 small nuclear ribonucleoprotein auxiliary factor 35 kD subunit related protein 1 (sp|Q15695
264455_at	At1g10330	0.220915	0.307124	0.625246	0.853992	0.762384	0.557251		NS	NS	NS		3.87633	3.72121	3.82041	3.83509		hypothetical protein predicted by genscan
264434_at	At1g10340	0.267286	0.385331	0.737473	0.893977	0.793721	0.709374		NS	NS	NS		4.35036	4.14796	4.40821	4.30745		hypothetical protein predicted by genscan; supported by cDNA: gi_13937239_gb_AF372975.1_AF372975
264464_at	At1g10350	0.26605	0.239739	0.618303	0.439616	0.0627153	0.898082		NS	NS	NS		5.602	5.72618	5.65524	5.7801		putative heat-shock protein similar to GB:AAD39315;supported by full-length cDNA: Ceres:37036.
264435_at	At1g10360	0.00298718	0.356267	0.0545778	0.607459	0.241306	0.605059		NS	NS	NS		7.35085	7.69346	7.55779	7.50248		putative glutathione S-transferase TSI-1 similar to glutathione S-transferase (sp|Q03666|GTX4_TOBAC); similar to EST gb|H36275; supported by cDNA: gi_11096013_gb_AF288190.1_AF288190
264436_at	At1g10370	0.32096	0.869724	0.604876	0.603209	0.246226	0.904958		NS	NS	NS		4.69293	4.42253	4.53772	4.38754		putative glutathione S-transferase TSI-1 similar to glutathione S-transferase TSI-1 (gi|2190992); similar to ESTs gb|R29860, emb|Z29757, and emb|Z29758; supported by cDNA: gi_11096015_gb_AF288191.1_AF288191
264466_at	At1g10380	0.258379	0.574961	0.782719	0.849591	0.176704	0.506601		NS	NS	NS		5.62545	5.43307	5.58717	5.38033		Expressed protein ; supported by full-length cDNA: Ceres: 156978.
264456_at	At1g10390	0.0538474	0.921259	0.0920291	0.967706	0.0970332	0.919517		NS	NS	NS		5.59056	5.83641	5.81754	5.78843		unknown protein similar to T cell receptor beta chain CDR3 (gi|3064031); similar to nucleoporin NUP145 (sp|P49687|N145_YEAST); similar to ESTs gb|N37877, emb|Z29159, and emb|Z30865
264457_at	At1g10400	0.408962	0.569884	0.336235	0.971961	0.762459	0.303447		NS	NS	NS		3.98772	3.87915	3.86355	4.02632		puative glucosyl transferase similar to immediate-early salicylate-induced glucosyltransferase (AC005167)
264458_at	At1g10410	0.112188	0.946428	0.140333	0.983408	0.0447652	0.355916		NS	NS	NS		4.96423	5.26753	5.1984	5.34211		unknown protein similar to ESTs gb|N96021 and gb|N96863
263234_at	At1g10420	0.345525	0.961214	0.818464	0.404732	0.0420849	0.388363		NS	NS	NS		3.18416	3.11638	3.20328	3.04517		hypothetical protein predicted by genefinder
263235_at	At1g10430	0.426575	0.224481	0.0453305	0.473655	0.526986	0.239388		NS	NS	NS		6.15324	6.04137	5.95488	6.09759		serine/threonine protein phosphatase, PP2A, catalytic subunit similar to ESTs emb|Z35739, gb|AA869861, gb|AA490696, gb|AA791751, and gb|AA042146; supported by cDNA: gi_166822_gb_M96733.1_ATHPRPHB
263211_at	At1g10460	0.542078	0.655035	0.830406	0.659392	0.283307	0.876738		NS	NS	NS		4.27809	4.22194	4.25364	4.42257		germin-like oxalate oxidase similar to ESTs gb|T88481 and gb|AI099566; supported by cDNA: gi_1755181_gb_U75202.1_ATU75202
263236_at	At1g10470	0.193065	0.0258475	0.0856954	0.482878	0.166535	0.282306		NS	NS	NS		8.57343	8.47527	8.40629	8.40641		putative response regulator 3 similar to ESTs gb|T43772, emb|Z34204, gb|AA067391, and emb|Z34620, implicated in His-to-Asp phosphotransfer signaling in Arabidopsis; supported by cDNA: gi_3273195_dbj_AB010915.1_AB010915
263208_at	At1g10480	0.808471	0.89475	0.180401	0.17018	0.340419	0.554611		NS	NS	NS		3.22093	3.24214	3.32725	3.3177		zinc finger protein 5, ZFP5 possible transcription factor with C2H2 zinc finger;supported by full-length cDNA: Ceres:23664.
263255_at	At1g10490	0.102915	0.720323	0.104745	0.82505	0.0202161	0.74357		NS	NS	NS		4.93104	4.67809	4.67411	4.45466		unknown protein similar to steroid receptor-like protein GB:AAB54126 from [Caenorhabditis elegans], and ESTs dbj|C26360, gb|T45760, and gb|AA394518
263256_at	At1g10500	0.430042	0.431183	0.894697	0.911367	0.608644	0.984219		NS	NS	NS		8.15567	8.0787	8.14406	8.1045		unknown protein similar to ESTs gb|H36734 and gb|AA651244
263212_at	At1g10510	0.983129	0.211486	0.847177	0.843445	0.239676	0.481266		NS	NS	NS		6.10898	6.10599	6.08814	5.97986		unknown protein similar to ribonuclease inhibitors; supported by cDNA: gi_15810394_gb_AY056236.1_
263257_at	At1g10520	0.0646523	0.74771	0.155217	0.0694707	0.369942	0.0825485		NS	NS	NS		3.09989	2.98231	3.18735	3.0427		putative DNA polymerase Beta similar to (emb|CAA75741)
263209_at	At1g10522	0.0192373	0.370275	0.0467621	0.966893	0.0609102	0.319103		NS	NS	NS		5.96128	5.24221	5.33682	5.40195		Expressed protein ; supported by full-length cDNA: Ceres: 264189.
257450_at	At1g10530	0.920733	0.397887	0.477543	0.130654	0.0720251	0.802336		NS	NS	NS		3.52691	3.52047	3.59829	3.65599		unknown protein similar to gb|AAD14477
263258_at	At1g10540	0.909819	0.633555	0.82705	0.351842	0.233667	0.321325		NS	NS	NS		3.50948	3.49535	3.48597	3.36875		putative permease similar to putative permease (gb|AAD14479)
263207_at	At1g10550	0.0909144	0.212919	0.436269	0.0559469	0.0825242	0.197806		NS	NS	NS		3.7228	3.99518	3.79812	3.61512		putative endoxyloglucan transferase similar to xyloglucan endotransglycosylase-related protein XTR4 (pir|IS71223);supported by full-length cDNA: Ceres:27813.
263259_at	At1g10560	0.446985	0.493485	0.662246	0.946251	0.78809	0.546742		NS	NS	NS		4.27568	4.39266	4.20014	4.2336		putative zinc-binding protein similar to zinc-binding protein (gi|3249068)
263260_at	At1g10570	0.065455	0.27717	0.270414	0.93529	0.551079	0.176841		NS	NS	NS		5.04479	5.23569	5.12364	5.09725		putative protein-tyrosine phosphatase 2 similar to protein-tyrosine phosphatase 2 (gi|3249071), similar to EST gb|N96456
263261_at	At1g10580	0.226044	0.430304	0.465925	0.105249	0.72951	0.370028		NS	NS	NS		5.47586	5.34929	5.40508	5.44003		putative pre-mRNA splicing factor similar to splicing factor hPRP17 (gi|3283220); similar to ESTs emb|F15435 and dbj|AUO62661
263210_at	At1g10585	0.451717	0.679033	0.261217	0.269418	0.347349	0.944452		NS	NS	NS		2.80681	2.85608	2.87456	2.86625		Expressed protein ; supported by cDNA: gi_15293050_gb_AY050959.1_
263206_at	At1g10590	0.138733	0.343942	0.304581	0.439353	0.229575	0.521294		NS	NS	NS		9.11112	8.9867	9.03326	8.99159		unknown protein similar to ESTs gb|T43206, gb|H76501, gb|AA651577, and gb|AA605326;supported by full-length cDNA: Ceres:7488.
263237_at	At1g10610	0.702952	0.21617	0.614165	0.640478	0.717567	0.790989		NS	NS	NS		3.67504	3.71982	3.75121	3.72343		hypothetical protein contains similarity to bHLH transcription factor GI:3757520 from (Arabidopsis thaliana)
261830_at	At1g10620	0.0954703	0.890849	0.944667	0.0691528	0.0425897	0.777173		NS	NS	NS		3.04161	2.95987	3.03733	3.15085		protein kinase, putative similar to protein kinase 1 GI:7573596 from [Populus nigra]
261831_at	At1g10630	0.00820336	0.886497	0.132328	0.566696	0.026645	0.892977		NS	NS	NS		7.63767	7.31576	7.52332	7.39828		ADP-ribosylation factor, putative similar to ADP-ribosylation factor GI:166586 from [Arabidopsis thaliana]
261834_at	At1g10640	0.0166295	0.926184	0.0845428	0.464139	0.237474	0.259178		NS	NS	NS		4.58835	4.06179	4.18653	4.37776		polygalacturonase PG1, putative similar to polygalacturonase PG1 GI:5669846 from [Glycine max]; supported by cDNA: gi_14532455_gb_AY039852.1_
261832_at	At1g10650	0.0195307	0.243558	0.0289317	0.0686203	0.12984	0.0717907		NS	NS	NS		4.89987	4.66594	4.70848	4.73738		S-ribonuclease binding protein SBP1, putative similar to S-ribonuclease binding protein SBP1 GI:6760451 from [Petunia hybrida];supported by full-length cDNA: Ceres:108776.
257477_at	At1g10660	0.217098	0.35077	0.378173	0.0685461	0.893911	0.614266		NS	NS	NS		5.30657	5.49369	5.20536	5.28825		unknown protein
261833_at	At1g10670	0.109692	0.299522	0.285904	0.553792	0.0915773	0.253522		NS	NS	NS		8.93572	8.799	8.86246	8.81588		ATP citrate-lyase, putative similar to ATP citrate-lyase GI:9229902 from [Ciona intestinalis];supported by full-length cDNA: Ceres:36439.
261829_at	At1g10680	0.00755179	0.000587165	0.500343	0.0737644	0.227107	0.607276		NS	NS	NS		3.2997	3.43289	3.32046	3.34731		P-glycoprotein, putative similar to P-glycoprotein GI:4204793 from [Solanum tuberosum]
262788_at	At1g10690	0.012617	0.629445	0.00257707	0.151943	0.000141423	0.107801		NS	NS	0.000141423		3.58578	3.84832	3.84133	3.96779		unknown protein ESTs gb|T75618 and gb|AA404816 come from this gene
262762_at	At1g10700	0.0514094	0.497248	0.0076139	0.223449	0.14732	0.445632		NS	NS	NS		5.92647	6.21076	6.33209	6.10551		phosphoribosyl diphosphate synthase identical to phosphoribosyl diphosphate synthase GI:4902470 from (Arabidopsis thaliana); supported by cDNA: gi_16604385_gb_AY058091.1_
262792_at	At1g10710	0.443175	0.334578	0.414615	0.139792	0.314351	0.244233		NS	NS	NS		3.06838	3.17697	3.14183	3.16176		hypothetical protein predicted by genemark.hmm
262761_at	At1g10720	0.00553571	0.393449	0.010996	0.5788	0.686993	0.111571		NS	NS	NS		4.8824	4.54766	4.64217	4.82465		unknown protein ESTs gb|AA395702, gb|AA395400, gb|T22596 and gb|T43781 come from this gene; supported by full-length cDNA: Ceres: 28214.
262787_at	At1g10730	0.158168	0.565548	0.350515	0.36455	0.221743	0.379911		NS	NS	NS		3.71324	3.55643	3.61754	3.57099		putative clathrin-coat assembly protein similar to gb|L26291 clathrin-associated protein unc-101 from Caenorhabditis elegans and is a member of the PF|00928 Adapter complexes medium subunit family
262786_at	At1g10740	0.176722	0.877321	0.174179	0.361991	0.109776	0.0793794		NS	NS	NS		5.16932	5.29677	5.33096	5.31564		putative lipase similar to gb|X02844 lipase precursor from Staphylococcus hyicus. ESTs gb|AI239406 and gb|T76725 come from this gene
262785_at	At1g10750	0.26484	0.408751	0.689915	0.736231	0.758386	0.0563749		NS	NS	NS		3.53336	3.44577	3.483	3.50359		putative carboxyl-terminal peptidase similar to gi|3128199 F4I1.5 putative proteinase from Arabidopsis thaliana BAC gb|AC004521
262784_at	At1g10760	0.620672	0.391346	0.909702	0.789661	0.149833	0.616829		NS	NS	NS		10.8743	10.9254	10.8618	11.0433		unknown protein strong similarity to gb|Y09533 involved in starch metabolism from Solanum tuberosum and contains a PF|01326 Pyruvate phosphate dikinase, PEP/pyruvate binding domain. EST gb|N96757 comes from this gene; supported by cDNA: gi:12044357
262760_at	At1g10770	0.0115644	0.792237	0.0484477	0.348789	0.0281913	0.659633		NS	NS	NS		3.55563	3.80712	3.76891	3.80185		hypothetical protein contains similarity to pectinesterase GI:9759184 from (Arabidopsis thaliana);supported by full-length cDNA: Ceres:1989.
262758_at	At1g10780	0.392094	0.901842	0.954452	0.223104	0.391938	0.765655		NS	NS	NS		3.64254	3.57397	3.63741	3.57456		hypothetical protein predicted by genemark.hmm
262759_at	At1g10800	0.302134	0.366587	0.482891	0.527862	0.790392	0.359089		NS	NS	NS		3.80667	3.88015	3.86461	3.82847		unknown protein
262789_at	At1g10810	0.779281	0.173655	0.192456	0.834675	0.847235	0.178154		NS	NS	NS		3.32864	3.30861	3.22841	3.33845		putative auxin-induced protein strong similarity to gb|X56267 auxin-induced protein (pCNT115) from Nicotiana tabacum and is a member of the PF|00248 Aldo/keto reductase family
262791_at	At1g10830	0.0729482	0.507607	0.169825	0.187421	0.599758	0.204278		NS	NS	NS		6.84167	6.66392	6.73148	6.79522		unknown protein EST gb|F13926 comes from this gene;supported by full-length cDNA: Ceres:21943.
262790_at	At1g10840	0.170053	0.314652	0.020012	0.204883	0.101841	0.658075		NS	NS	NS		7.32856	7.24355	7.16889	7.13461		putative translation initiation factor similar to gb|U54559 eIF3-p40 subunit from Homo sapiens and is a member of the PF|01398 Mov34 family. ESTs gb|N96623 and gb|N07519 come from this gene;supported by full-length cDNA: Ceres:34385.
262783_at	At1g10850	0.0536431	0.628249	0.204034	0.719591	0.0233144	0.113457		NS	NS	NS		4.11184	3.85032	3.97889	3.82972		receptor-kinase isolog
260469_at	At1g10870	0.32009	0.287267	0.859973	0.344814	0.256118	0.250971		NS	NS	NS		4.83271	4.93619	4.85193	4.68905		BRCA1-associated RING domain protein isolog
260473_at	At1g10880	0.862342	0.967019	0.728182	0.958418	0.393598	0.0753196		NS	NS	NS		3.029	3.01655	3.0063	3.08956		hypothetical protein predicted by genefinder and genscan
260467_at	At1g10890	0.336604	0.971049	0.527961	0.456018	0.714283	0.655417		NS	NS	NS		3.57366	3.46719	3.50741	3.62049		unknown protein
260466_at	At1g10900	0.00142828	0.195302	0.00396607	0.615419	0.000682253	0.494193		0.00142828	NS	0.000682253		4.70676	5.48269	5.24569	5.79797		phosphatidylinositol-4-phosphate 5-kinase isolog
260465_at	At1g10910	0.0584834	0.585531	0.150277	0.961415	0.316413	0.930128		NS	NS	NS		5.7259	6.22187	6.09855	6.01589		membrane-associated salt-inducible protein isolog
260464_at	At1g10920	0.291971	0.643292	0.405884	0.0953218	0.628836	0.509566		NS	NS	NS		4.26346	4.14956	4.16659	4.31882		disease resistance protein RPM1 isolog
260463_at	At1g10930	0.760212	0.873182	0.414029	0.882601	0.802797	0.43398		NS	NS	NS		4.2455	4.28205	4.18172	4.26499		DNA helicase isolog
260480_at	At1g10940	0.0880614	0.983575	0.236323	0.849623	0.443797	0.86523		NS	NS	NS		6.13353	6.33453	6.23212	6.19182		Ser/Thr kinase ;supported by full-length cDNA: Ceres:100245.
260482_at	At1g10950	0.260069	0.342834	0.387123	0.743564	0.96496	0.819447		NS	NS	NS		6.78893	6.99227	6.95517	6.78231		endomembrane protein EMP70 precusor isolog ; supported by cDNA: gi_15451171_gb_AY054666.1_
260481_at	At1g10960	7.77817e-05	0.577147	0.00461554	0.911369	0.000632619	0.466738		7.77817e-05	NS	0.000632619		10.464	9.93697	10.1282	10.0883		ferredoxin precusor isolog ;supported by full-length cDNA: Ceres:20637.
260462_at	At1g10970	0.481115	0.83483	0.258102	0.985172	0.419347	0.776012		NS	NS	NS		4.55201	4.43472	4.36413	4.39705		ZIP4, a putative zinc transporter per suggestion by Dr. Natasha M. Grotz (PNAS, Vol 95., 7220-7224)
260461_at	At1g10980	0.877487	0.514715	0.679107	0.922911	0.759707	0.552013		NS	NS	NS		3.54444	3.5293	3.58278	3.5796		membrane protein PTM1 precursor isolog
260472_at	At1g10990	0.865435	0.700998	0.067053	0.643758	0.138782	0.0191353		NS	NS	NS		4.20065	4.16325	4.46802	4.38974		hypothetical protein predicted by genefinder and genscan
260483_at	At1g11000	0.88993	0.136808	0.624117	0.353103	0.798939	0.628622		NS	NS	NS		4.15743	4.14174	4.10199	4.13826		Barley Mlo protein isolog ; supported by cDNA: gi_14091577_gb_AF369565.1_AF369565
260479_at	At1g11020	0.0418989	0.310557	0.599483	0.898925	0.164684	0.865649		NS	NS	NS		5.56063	5.85274	5.62461	5.76208		hypothetical protein predicted by genefinder;supported by full-length cDNA: Ceres:40765.
260478_at	At1g11040	0.141048	0.910443	0.909263	0.0526821	0.0661526	0.526173		NS	NS	NS		3.3086	3.42273	3.31617	3.43192		DnaJ isolog
260477_at	At1g11050	0.187828	0.336276	0.0783267	0.897955	0.12335	0.490413		NS	NS	NS		4.47831	4.65447	4.78811	4.71636		Ser/Thr protein kinase isolog
260476_at	At1g11060	0.124063	0.633729	0.239447	0.636918	0.420841	0.65726		NS	NS	NS		4.17505	4.00295	4.30113	4.08695		unknown protein
260471_at	At1g11070	0.346008	0.332599	0.104908	0.0829307	0.491303	0.28331		NS	NS	NS		2.99279	2.93095	2.89298	3.03215		hypothetical protein predicted by genefinder
260475_at	At1g11080	0.445186	0.562571	0.722321	0.607396	0.621171	0.0856244		NS	NS	NS		3.13803	3.17989	3.1156	3.16836		Serine carboxypeptidase isolog
260474_at	At1g11090	0.390811	0.126583	0.662569	0.291647	0.554667	0.183491		NS	NS	NS		5.47469	5.53249	5.44165	5.51488		lysophospholipase isolog
260468_at	At1g11100	0.620951	0.615529	0.491352	0.483371	0.300892	0.469013		NS	NS	NS		3.42271	3.37748	3.49059	3.57186		transcription factor RUSH-1alpha isolog
260470_at	At1g11120	0.00191235	0.0401062	0.189627	0.365699	0.205059	0.313891		0.00191235	NS	NS		3.95905	4.32981	4.07146	4.08756		hypothetical protein predicted by genefinder
262479_at	At1g11130	0.291768	0.452823	0.182477	0.340649	0.451389	0.162581		NS	NS	NS		4.27903	4.12517	4.06554	4.18978		leucine-rich repeat transmembrane protein kinase, putative similar to leucine-rich repeat transmembrane protein kinase GB:AAC27895 GI:3360291 from [Zea mays]
262451_at	At1g11140	0.23946	0.590354	0.0626134	0.336364	0.311366	0.895017		NS	NS	NS		5.46108	5.26394	5.12419	5.30958		receptor-associated kinase isolog
262449_at	At1g11160	0.170944	0.52214	0.194553	0.30271	0.0796887	0.766767		NS	NS	NS		2.99053	2.88458	2.89194	2.84823		hypothetical protein similar to hypothetical protein GB:AAD49999 GI:5734734 from [Arabidopsis thaliana]
262478_at	At1g11170	0.0340858	0.799296	0.36828	0.185207	0.228428	0.813576		NS	NS	NS		4.07074	4.42641	4.18165	3.92815		hypothetical protein similar to hypothetical protein GB:AAD49998 GI:5734733 from [Arabidopsis thaliana]
262454_at	At1g11190	0.782749	0.793596	0.642943	0.465756	0.458496	0.130468		NS	NS	NS		3.78108	3.752	3.84692	3.85524		bifunctional nuclease bfn1 almost identical to bifunctional nuclease bfn1 GB:AAD00693 GI:4099831 from [Arabidopsis thaliana];supported by full-length cDNA: Ceres:643.
262457_at	At1g11200	0.634839	0.341634	0.13574	0.273909	0.387546	0.648385		NS	NS	NS		5.86519	5.9046	5.9985	5.96299		hypothetical protein similar to hypothetical protein GB:CAB36801 GI:4455265 from [Arabidopsis thaliana]; supported by full-length cDNA: Ceres: 40975.
262452_at	At1g11210	0.000559545	0.0219063	0.015274	0.57072	8.02902e-05	0.502264		0.000559545	NS	8.02902e-05		5.32555	6.10771	5.98295	6.50675		hypothetical protein similar to hypothetical protein GB:AAD50003 GI:5734738 from [Arabidopsis thaliana];supported by full-length cDNA: Ceres:37592.
262477_at	At1g11220	0.0294444	0.157589	0.338359	0.413405	0.291475	0.277248		NS	NS	NS		3.59743	3.77364	3.65179	3.68099		hypothetical protein contains similarity to cotton fiber expressed protein GB:AAC33276 from [Gossypium hirsutum]
262453_at	At1g11240	0.983544	0.587706	0.425819	0.132257	0.410591	0.725126		NS	NS	NS		5.53493	5.53706	5.44634	5.62325		hypothetical protein predicted by genemark.hmm;supported by full-length cDNA: Ceres:111951.
262511_at	At1g11250	0.9695	0.0118333	0.767523	0.703205	0.948672	0.49056		NS	NS	NS		3.60628	3.60374	3.57408	3.6006		syntaxin-related protein At-SYR1, putative similar to syntaxin-related protein At-SYR1 GB:AAD11809 GI:4206789 from [Arabidopsis thaliana]
262456_at	At1g11260	0.025403	0.524535	0.0548703	0.659901	0.520771	0.868261		NS	NS	NS		8.50029	8.93472	8.98533	8.59248		glucose transporter almost identical to glucose transporter GB:P23586 from [Arabidopsis thaliana]; supported by full-length cDNA: Ceres: 33727.
262510_at	At1g11270	0.87595	0.209922	0.0368016	0.542512	0.491542	0.627658		NS	NS	NS		4.07119	4.05269	3.84993	4.14283		hypothetical protein similar to hypothetical protein GB:AAC27404 GI:3337359 from [Arabidopsis thaliana]
262458_at	At1g11280	0.562725	0.737037	0.597057	0.880862	0.818874	0.471728		NS	NS	NS		5.5065	5.66638	5.6531	5.4428		serine/threonine kinase, putative similar to serine/threonine kinase GB:Y12530 GI:2181187 from [Brassica oleracea]; supported by cDNA: gi_15810422_gb_AY056250.1_
262509_at	At1g11290	0.839727	0.818924	0.878122	0.419856	0.636423	0.700003		NS	NS	NS		4.64033	4.66207	4.65991	4.55809		hypothetical protein similar to hypothetical protein GB:BAA93030 GI:7363286 from [Oryza sativa]
262508_at	At1g11300	0.783026	0.632527	0.512666	0.839966	0.600946	0.926556		NS	NS	NS		3.92189	3.98429	4.0562	3.81277		serine/threonine kinase, putative similar to serine/threonine kinase GB:Y12531 GI:2181189 from [Brassica oleracea]
262455_at	At1g11310	0.024897	0.306584	0.0819401	0.0753941	0.744707	0.925461		NS	NS	NS		8.75896	8.48278	8.91768	8.79581		Mlo protein, putative similar to Mlo protein GB:Z83834 GI:1877220 from [Hordeum vulgare];supported by full-length cDNA: Ceres:259664.
262450_at	At1g11320	0.14779	0.739259	0.3633	0.970226	0.36065	0.773817		NS	NS	NS		4.85984	4.60475	4.99259	4.70276		hypothetical protein identical to hypothetical protein GB:AAD49990 GI:5734725 from [Arabidopsis thaliana]
262507_at	At1g11330	0.667398	0.241439	0.107885	0.557575	0.730625	0.739189		NS	NS	NS		5.7646	5.63779	6.24968	5.65917		receptor-like protein kinase, putative similar to receptor-like protein kinase GB:AAC95353 GI:4008010 from [Arabidopsis thaliana]
262480_at	At1g11340	0.967528	0.047661	0.0938105	0.619704	0.706025	0.148223		NS	NS	NS		3.39712	3.39443	3.51357	3.37301		receptor kinase, putative similar to receptor kinase 1 GB:BAA23676 GI:2662048 from [Brassica rapa]
261873_at	At1g11350	0.065061	0.541116	0.0507417	0.245273	0.592255	0.868251		NS	NS	NS		6.37978	6.69407	6.65458	6.44338		serine/threonine kinase, putative similar to serine/threonine kinase GI:2181189 from [Brassica oleracea]
261828_at	At1g11360	0.302387	0.909641	0.666942	0.730665	0.798526	0.534264		NS	NS	NS		6.31384	6.17359	6.36833	6.28237		unknown protein ; supported by cDNA: gi_15215773_gb_AY050416.1_
261849_at	At1g11370	0.849215	0.659086	0.933653	0.252828	0.345262	0.987039		NS	NS	NS		3.02247	3.03676	3.01334	2.95177		pectin methylesterase, putative similar to pectin methylesterase GI:1279597 from [Nicotiana plumbaginifolia]
261822_at	At1g11380	0.0171114	0.443625	0.0191909	0.209586	0.834631	0.883841		NS	NS	NS		4.65907	5.3503	5.23344	4.68529		unknown protein ;supported by full-length cDNA: Ceres:113571.
261818_at	At1g11390	0.736406	0.28405	0.704576	0.0657141	0.39416	0.938689		NS	NS	NS		4.52574	4.56517	4.49341	4.4337		similar to hypethetical 62.8 KD protein in SSE1-CAR1 intergenic region sp|Q02981; similar to ESTs gb|AI998535, emb|F15402 contains similarity to aminoglycoside acetyltransferase regulator GI:2183252 from [Providencia stuartii]
261823_at	At1g11400	0.173697	0.281615	0.571669	0.785098	0.974762	0.498589		NS	NS	NS		4.44216	4.68931	4.53457	4.43648		hypothetical protein predicted by genemark.hmm;supported by full-length cDNA: Ceres:108306.
261819_at	At1g11410	0.485136	0.316272	0.198334	0.97576	0.0686982	0.453319		NS	NS	NS		5.91674	6.01422	6.09317	6.15752		receptor-like kinase, putative similar to receptor-like kinase GI:1783311 from [Brassica oleracea]
261820_at	At1g11420	0.960425	0.609598	0.0892373	0.131711	0.39738	0.936192		NS	NS	NS		2.98562	2.98903	3.07446	3.03688		hypothetical protein predicted by genemark.hmm
261824_at	At1g11430	0.166972	0.84397	0.249127	0.672665	0.718676	0.346023		NS	NS	NS		8.7899	8.54302	8.62284	8.7352		DAG protein, putative similar to DAG protein GI:1200204 from [Antirrhinum majus]; supported by full-length cDNA: Ceres: 35647.
261871_at	At1g11440	0.0222225	0.984816	0.702872	0.495752	0.582225	0.994384		NS	NS	NS		5.87843	6.19943	5.91425	5.93702		similar to serine/threonine protein kinase emb|CAA69216 contains similarity to extensin protein GI:512380 from [Brassica napus]
261868_s_at	At1g11460	0.12405	0.464637	0.136988	0.45402	0.474102	0.724633		NS	NS	NS		2.61587	2.69958	2.69283	2.65064		hypothetical protein contains similarity to nodulin-like protein GI:9294338 from [Arabidopsis thaliana]
261869_at	At1g11470	0.479646	0.460843	0.741012	0.96945	0.844326	0.433839		NS	NS	NS		3.43049	3.34622	3.39322	3.4079		hypothetical protein predicted by genemark.hmm
261827_at	At1g11480	0.0359028	0.221018	0.0864229	0.813592	0.79097	0.928317		NS	NS	NS		5.82811	5.9839	5.92988	5.84442		unknown protein contains similarity to eukaryotic initiation factor 4B GI:6739515 from [Triticum aestivum]; supported by cDNA: gi_14335083_gb_AY037221.1_
261872_s_at	At1g11520	0.378141	0.352217	0.738542	0.185167	0.265109	0.8076		NS	NS	NS		5.07152	5.16373	5.09606	5.18601		hypthetical protein contains similarity to spliceosome associated protein SAP 145 GI:1173904 from [Homo sapiens]
261821_at	At1g11530	0.00101076	0.991076	0.00058047	0.603008	0.00972984	0.127623		0.00101076	0.00058047	NS		7.89486	8.25293	8.13969	8.28699		thioredoxin h, putative similar to thioredoxin h GI:4928460 from [Hevea brasiliensis];supported by full-length cDNA: Ceres:2054.
261846_at	At1g11540	0.412082	0.213328	0.0931969	0.616612	0.472058	0.562417		NS	NS	NS		4.29393	4.21972	4.12974	4.21635		hypothetical protein similar to hypothetical protein GI:4079632 from [Arabidopsis thaliana]
261825_at	At1g11545	0.000488336	0.818011	0.0753688	0.926025	0.00977148	0.648522		0.000488336	NS	NS		6.69	5.87473	6.24985	5.92052		endo-xyloglucan transferase, putative similar to endo-xyloglucan transferase GI:2244732 from [Gossypium hirsutum];supported by full-length cDNA: Ceres:7729.
261847_at	At1g11560	0.247941	0.217324	0.880577	0.373871	0.0106119	0.156514		NS	NS	NS		3.3692	3.30342	3.36239	3.19242		hypothetical protein predicted by genemark.hmm
261870_at	At1g11570	0.802696	0.928	0.594772	0.165018	0.625146	0.899797		NS	NS	NS		3.21111	3.18885	3.2602	3.25435		nuclear transport factor 2, putative similar to nuclear transport factor 2 GI:5360221 from [Oryza sativa]
261826_at	At1g11580	0.084734	0.871296	0.367407	0.366054	0.227364	0.764993		NS	NS	NS		5.28296	4.81021	5.08712	4.949		pectin methylesterase, putative similar to pectin methylesterase GI:1617583 from [Lycopersicon esculentum]; supported by cDNA: gi_14334991_gb_AY037175.1_
261848_at	At1g11590	0.247186	0.803067	0.102369	0.245509	0.383008	0.180823		NS	NS	NS		3.13862	3.22813	2.99908	3.07392		pectin methylesterase, putative similar to fruit-specific pectin methylesterase GI:1617583 from [Lycopersicon esculentum]
262819_at	At1g11600	0.585377	0.869389	0.804359	0.565913	0.0590453	0.115763		NS	NS	NS		4.05877	4.11423	4.08618	4.27227		putative cytochrome P450 strong similarity to gb|U61231 cytochrome P450 from Arabidopsis thaliana and is a member of the PF|00067 Cytochrome P450 family. ESTs gb|Z30775 and gb|Z30776 come from this gene;supported by full-length cDNA: Ceres:117895.
262815_at	At1g11610	0.00576219	0.0229271	0.950195	0.943048	0.259591	0.865207		NS	NS	NS		2.80571	2.96562	2.80862	2.75781		putative cytochrome P450 strong similarity to gi|2880052 T11J7.14 putative cytochrome P450 from Arabidopsis thaliana and is a member of the PF|00067 Cytochrome P450 family
262822_at	At1g11630	0.373981	0.832492	0.0424086	0.091769	0.0408317	0.502051		NS	NS	NS		4.73462	4.61122	4.4727	4.43022		putative membrane-associated salt-inducible protein strong similarity to gi|3367521 F8K4.8 from Arabidopsis thaliana BAC gb|AC004392;supported by full-length cDNA: Ceres:38193.
262824_at	At1g11650	0.462494	0.614695	0.356447	0.961644	0.507645	0.846234		NS	NS	NS		9.67797	9.73258	9.73709	9.71863		putative DNA binding protein similar to gb|U90212 DNA binding protein ACBF from Nicotiana tabacum and contains 3 PF|00076 RNA recognition motif domains. ESTs gb|T44278, gb|R65195, gb|N65904, gb|H37499, gb|R90487, gb|N95952, gb|T44278, gb|Z20166, gb|N96891, gb|W43137, gb|F15504, gb|F1
262814_at	At1g11660	0.602676	0.653649	0.523401	0.847724	0.456733	0.999802		NS	NS	NS		5.65547	5.73586	5.74979	5.55661		putative heat-shock protein strong similarity to gb|Z70314 heat-shock protein from Arabidopsis thaliana and is a member of the PF|00012 Hsp70 protein family
262813_at	At1g11670	0.0541784	0.162481	0.0614987	0.993131	0.0233995	0.862218		NS	NS	NS		3.89908	3.65235	3.64651	3.62553		unknown protein strong similarity to gi|3367522 F8K4.9 from Arabidopsis thaliana BAC gb|AC004392. EST gb|W43487 comes from this gene
262820_at	At1g11680	0.427417	0.903395	0.861191	0.955497	0.33486	0.441286		NS	NS	NS		7.31045	7.40544	7.30137	7.36322		putative obtusifoliol 14-alpha demethylase strong similarity to gb|U74319 obtusifoliol 14-alpha demethylase (CYP51) from Sorghum bicolor and is a member of the PF|00067 cytochrome P450 family. ESTs gb|AA72030, gb|N65031 and gb|AA651059 come from this gene;supported by full-length cDNA: Ceres:11030
262812_at	At1g11690	0.848551	0.0311282	0.333005	0.998835	0.993886	0.923159		NS	NS	NS		3.10262	3.1161	3.1845	3.10204		hypothetical protein predicted by genscan
262811_at	At1g11700	0.00073817	0.322042	0.00701302	0.132759	0.416742	0.641844		0.00073817	NS	NS		5.12486	4.55745	4.68624	4.96586		unknown protein ESTs gb|R65381 and gb|T44635 come from this gene
262810_at	At1g11710	0.808124	0.896413	0.993039	0.959014	0.784469	0.417407		NS	NS	NS		3.34627	3.37046	3.3475	3.3735		putative salt-inducible protein similar to GB:AAD17407
262809_at	At1g11720	0.461625	0.656461	0.9534	0.551041	0.252502	0.544568		NS	NS	NS		5.59932	5.6424	5.59396	5.73571		putative glycogen synthase strong similarity to gb|X95759 soluble-starch-synthase precursor (SSIII) from Solanum tuberosum
262808_at	At1g11730	0.694815	0.672966	0.903252	0.838465	0.528406	0.973312		NS	NS	NS		3.67564	3.71871	3.68963	3.75825		Avr9 elicitor response-like protein strong similarity to gb|AJ006228 Avr9 elicitor response protein from Nicotiana tabacum. EST gb|F15429 comes from this gene
262807_at	At1g11740	0.488262	0.0605724	0.0572169	0.18533	0.582091	0.0498938		NS	NS	NS		4.03507	3.97438	3.90239	4.07714		unknown protein strong similarity to gi|3367537 T8K4.24 from Arabidopsis thaliana BAC gb|AC004392. EST gb|N37796 comes from this gene
262823_at	At1g11750	0.94895	0.820371	0.696383	0.356452	0.52807	0.655641		NS	NS	NS		8.31146	8.30568	8.27893	8.36133		ATP-dependent Clp protease proteolytic subunit (ClpP6) identical to ATP-dependent Clp protease proteolytic subunit GI:2827888 from [Arabidopsis thaliana];supported by full-length cDNA: Ceres:33299.
262818_at	At1g11760	0.198232	0.259344	0.297971	0.967735	0.190917	0.292371		NS	NS	NS		5.21176	4.90863	5.01426	4.96728		hypothetical protein predicted by genscan
262817_at	At1g11770	0.583634	0.964978	0.738294	0.857164	0.550448	0.712586		NS	NS	NS		2.83963	2.88259	2.86564	2.88688		putative reticuline oxidase strong similarity to gb|AF049347 berberine bridge enzyme from Berberis stolonifera
262816_at	At1g11780	0.602358	0.522786	0.000305394	0.349991	0.0134434	0.00410075		NS	0.000305394	NS		5.40826	5.38294	5.15094	5.28972		alkylation repair-like protein
262825_at	At1g11790	0.00404763	0.970076	0.0169736	0.35016	6.77633e-05	0.836845		NS	NS	6.77633e-05		6.79518	6.26383	6.47864	6.31506		putative chloroplast prephenate dehydratase similar to gi|2392772 and is a member of the PF|00800 Prephenate dehydratase family. ESTs gb|T21562 and gb|T21062 come from this gene; supported by cDNA: gi_14596232_gb_AY042904.1_
262821_at	At1g11800	0.00388286	0.575575	0.224782	0.545221	0.0819596	0.785412		NS	NS	NS		5.16444	4.81532	5.02916	4.95966		unknown protein EST gb|F14156 comes from this gene;supported by full-length cDNA: Ceres:16491.
264397_at	At1g11820	0.0166771	0.801859	0.00556588	0.451456	0.00154046	0.843956		NS	NS	0.00154046		6.79088	6.34726	6.3547	6.32939		hypothetical protein
264372_at	At1g11840	0.701475	0.469725	0.286963	0.132304	0.656887	0.298378		NS	NS	NS		9.36276	9.33202	9.26675	9.32137		lactoylglutathione lyase-like protein Similar to protein gb|Z74962 from Brassica oleracea which is similar to bacterial YRN1 and HEAHIO proteins. ESTs gb|T21954, gb|T04283, gb|Z37609, gb|N37366, gb|R90704, gb|F15500 and gb|F14353 come from this gene;supported by full-length cDNA: Ceres:39107.
264343_at	At1g11850	0.691628	0.820253	0.188861	0.306675	0.296614	0.886633		NS	NS	NS		5.24642	5.33881	5.45637	5.63643		unknown protein ; supported by full-length cDNA: Ceres: 5171.
264394_at	At1g11860	0.00267545	0.3577	0.0309874	0.704944	0.0367541	0.257275		NS	NS	NS		11.0622	10.674	10.82	10.821		aminomethyltransferase-like precursor protein very strong similarity to aminomethyltransferase precursor gb|U79769 from Mesembryanthemum crystallinum. ESTs gb|T43167, gb|T21076, gb|H36999, gb|T22773, gb|N38038, gb|T13742, gb|Z26545, gb|T20753 and gb|W43123 come from this gene
264350_at	At1g11870	0.136649	0.698298	0.672425	0.0117575	0.387516	0.0448611		NS	NS	NS		6.32684	6.15934	6.29506	6.25232		putative seryl-tRNA synthetase similar to GB:CAA73496; supported by cDNA: gi_16226852_gb_AF428351.1_AF428351
264393_at	At1g11880	0.154847	0.698031	0.366694	0.681559	0.362146	0.101559		NS	NS	NS		3.74191	3.58681	3.85952	3.64649		unknown protein Contains similarity to hypothetical protein C18b11.05 gb|Z50728 from S. pombe. EST gb|H76601 comes from this gene
264373_at	At1g11890	0.0168918	0.785445	0.0749309	0.465972	0.134297	0.585571		NS	NS	NS		7.91078	7.63971	7.709	7.73724		putative vesicle transport protein Contains similarity to vesicle trafficking protein gb|U91538 from Mus musculus. ESTs gb|F15494 and gb|F14097 come from this gene;supported by full-length cDNA: Ceres:273.
264392_at	At1g11900	0.421537	0.894358	0.955492	0.835651	0.616707	0.539489		NS	NS	NS		3.99288	3.91878	3.99835	3.94176		hypothetical protein Similar to salt-inducible membrane protein gb|U08285 from Nicotiana tabacum. EST gb|F14010 comes from this gene
264344_at	At1g11910	0.0584727	0.85997	0.0927647	0.992149	0.00798604	0.676696		NS	NS	NS		10.7706	10.9544	10.921	11.0435		putative aspartic proteinase similar to GB:AAC49730;supported by full-length cDNA: Ceres:8972.
264345_at	At1g11915	0.675392	0.548251	0.685402	0.465367	0.450434	0.252466		NS	NS	NS		3.84179	3.80046	3.80155	3.75969		Expressed protein ; supported by cDNA: gi_15293302_gb_AY051085.1_
264391_at	At1g11920	0.785844	0.345971	0.939227	0.732858	0.90217	0.130729		NS	NS	NS		3.08502	3.06693	3.08976	3.09236		pectate lyase-like protein Similar to style development-specific protein 9612 precursor gb|X55193 and pectate lyase P59 precursor gb|X15499 from Lycopersicon esculentum
264349_at	At1g11930	0.744395	0.493419	0.955298	0.948157	0.873883	0.160822		NS	NS	NS		7.83056	7.86071	7.83388	7.84006		putative Proline synthetase associated protein Similar to hypothetical protein F09E5.8 gb|U37429 from C. elegans. ESTs gb|T42019 and gb|N97000 come from this gene; supported by cDNA: gi_16226281_gb_AF428291.1_AF428291
257422_at	At1g11940	0.700104	0.438113	0.439933	0.367501	0.0358987	0.489745		NS	NS	NS		3.63054	3.59347	3.5632	3.40294		hypothetical protein Contains similarity to hypothetical protein gb|U95973 from A. thaliana
264390_at	At1g11950	0.095617	0.334855	0.90699	0.0182983	0.732002	0.0379327		NS	NS	NS		3.77061	3.92467	3.77686	3.79173		putative DNA-binding protein Contains similarity to box helicases gb|U29097 from C. elegans and to the ENBP1 gene product gb|X95995 from Vicia sativa
264389_at	At1g11960	0.552089	0.976747	0.944388	0.87102	0.865393	0.596513		NS	NS	NS		5.44888	5.32593	5.46396	5.48504		unknown protein similar to hypothetical protein HYP1 gb|Z97338 from A. thaliana
264388_at	At1g11970	0.816381	0.188522	0.693614	0.993875	0.645971	0.163474		NS	NS	NS		3.12004	3.10163	3.08705	3.16935		hypothetical protein contains similarity to Ubiquitin-like protein NEDD8 gb|D10918 from Mus musculus
264387_at	At1g11990	0.915953	0.515675	0.660399	0.27335	0.799298	0.496296		NS	NS	NS		2.97414	2.98527	2.99792	2.95963		putative growth regulator protein contains similarity to axi 1 gene gb|X80301 from Nicotiana tabacum
264386_at	At1g12000	0.0191329	0.771948	0.203887	0.715109	0.0841391	0.748354		NS	NS	NS		6.52561	6.19784	6.33217	6.17411		putative pyrophosphate-fructose-6-phosphate 1-phosphotransferase similar to pyrophosphate-dependent phosphofuctokinase beta subunit gb|Z32850 from Ricinus communis. ESTs gb|N65773, gb|N64925 and gb|F15232 come from this gene
264346_at	At1g12010	0.795743	0.890647	0.833308	0.721728	0.279934	0.811216		NS	NS	NS		4.84415	4.91292	4.90195	5.15057		putative amino-cyclopropane-carboxylic acid oxidase (ACC oxidase) Strong similarity to amino-cyclopropane-carboxylic acid oxidase gb|L27664 from Brassica napus. ESTs gb|Z48548 and gb|Z48549 come from this gene; supported by cDNA: gi_15450652_gb_AY052694.1_
264385_at	At1g12020	0.766057	0.543164	0.48516	0.517904	0.272995	0.604276		NS	NS	NS		4.64323	4.60892	4.54934	4.79447		unknown protein
257421_at	At1g12030	0.502481	0.670815	0.204605	0.0746739	0.652853	0.13514		NS	NS	NS		3.71699	3.82479	3.6252	3.68644		hypothetical protein predicted by genefinder
264347_at	At1g12040	0.0897147	0.726855	0.921902	0.289501	0.175871	0.657021		NS	NS	NS		3.01005	3.17646	3.01469	3.10765		putative extensin strong similarity to extensin-like protein gb|Z34465 from Zea mays; supported by cDNA: gi_13809917_gb_AY026364.1_
264396_at	At1g12050	0.00862529	0.830216	0.0176776	0.842738	0.00107814	0.564684		NS	NS	0.00107814		6.9511	7.24927	7.17128	7.29034		fumarylacetoacetate hydrolase-like protein similar to fumarylacetoacetate hydrolase, gb|L41670 from Emericella nidulans
264395_at	At1g12070	0.411758	0.847908	0.660158	0.371989	0.300853	0.415681		NS	NS	NS		3.15062	3.08674	3.12442	3.24889		putative GDP-dissociation inhibitor Contains similarity to GDP-dissociation inhibitor gb|L07918 from Mus musculus
264342_at	At1g12080	0.829637	0.974711	0.905077	0.938784	0.55398	0.899907		NS	NS	NS		4.17972	4.25138	4.21966	3.96504		unknown protein ; supported by full-length cDNA: Ceres: 270281.
264371_at	At1g12090	0.341678	0.571107	0.720386	0.449446	0.87423	0.917493		NS	NS	NS		11.84	11.9308	11.8708	11.8275		pEARLI 1-like protein may be induced when levels of Aluminum become toxic or other stresses become present in the plant;supported by full-length cDNA: Ceres:5712.
264370_at	At1g12100	0.281693	0.507994	0.896476	0.110145	0.691623	0.690834		NS	NS	NS		3.37033	3.4571	3.36178	3.40495		hybrid proline-rich protein, putative similar to hybrid proline-rich protein GB:CAA59472 GI:4454097 from (Catharanthus roseus)
264348_at	At1g12110	0.000821404	0.270388	0.00224723	0.89386	0.000463613	0.287675		0.000821404	NS	0.000463613		7.75523	7.1555	7.12237	6.95165		putative NPK1-related protein kinase 2 similar to nitrate chlorate transporter GB:Q05085 from (Arabidopsis thaliana); supported by cDNA: gi_166667_gb_L10357.1_ATHCHL1A
260995_at	At1g12120	0.000649611	0.652015	0.0488325	0.698702	0.0138931	0.753098		0.000649611	NS	NS		6.29036	6.85952	6.6583	6.62273		unknown protein
260994_at	At1g12130	0.522893	0.670405	0.878294	0.118121	0.930597	0.556271		NS	NS	NS		3.09016	3.14083	3.09929	3.0983		hypothetical protein contains similarity to flavin-containing monooxygenase GB:AAB59631 GI:191259 from [Cavia porcellus]
260993_at	At1g12140	0.467705	0.197221	0.127668	0.649998	0.928222	0.279737		NS	NS	NS		7.73954	7.6482	7.57301	7.73283		hypothetical protein predicted by genemark.hmm
260992_at	At1g12150	0.553446	0.128241	0.138431	0.533958	0.457132	0.0076781		NS	NS	NS		2.97314	2.9453	3.0524	2.99019		hypothetical protein predicted by genemark.hmm
260991_at	At1g12160	0.22517	0.288986	0.733089	0.447318	0.861103	0.652648		NS	NS	NS		3.6677	3.5653	3.63031	3.64817		hypothetical protein predicted by genemark.hmm
260990_at	At1g12180	0.808142	0.698957	0.746349	0.542688	0.683863	0.646316		NS	NS	NS		3.67755	3.64748	3.63305	3.62814		hypothetical protein predicted by genemark.hmm
261024_at	At1g12190	0.914259	0.663531	0.404023	0.404336	0.92569	0.673176		NS	NS	NS		3.33003	3.34356	3.25956	3.33794		hypothetical protein predicted by genemark.hmm
261023_at	At1g12200	0.939206	0.0465338	0.990214	0.397209	0.0594746	0.999569		NS	NS	NS		4.54247	4.53314	4.5408	4.27799		unknown protein similar to unknown protein GB:AAF34848 GI:6997186 from [Arabidopsis thaliana]
260996_at	At1g12210	0.641003	0.130768	0.439024	0.920063	0.0507193	0.182779		NS	NS	NS		3.34887	3.33303	3.38902	3.2558		NBS/LRR disease resistance protein identical to NBS/LRR disease resistance protein GB:AAC26125 GI:3309619 from [Arabidopsis thaliana]
260966_at	At1g12220	0.506647	0.812474	0.731099	0.773828	0.295267	0.803385		NS	NS	NS		3.917	4.00803	3.96141	4.06888		NBS/LRR disease resistance protein, putative similar to NBS/LRR disease resistance protein GB:AAC26125 GI:3309619 from [Arabidopsis thaliana]
260967_at	At1g12230	0.045368	0.76366	0.131576	0.609788	0.188316	0.51337		NS	NS	NS		7.71219	7.93701	7.88466	7.85212		unknown protein contains similarity to transaldolase GB:P30148 from [Escherichia coli];supported by full-length cDNA: Ceres:7590.
260969_at	At1g12240	0.194865	0.460794	0.0740466	0.205016	0.0312317	0.680322		NS	NS	NS		7.92025	7.74989	7.677	7.56926		beta-fructosidase identical to beta-fructosidase GI:1871503 from [Arabidopsis thaliana]; supported by cDNA: gi_15028118_gb_AY046009.1_
260968_at	At1g12250	0.31463	0.915882	0.184775	0.991241	0.626002	0.624824		NS	NS	NS		8.49876	8.34796	8.29311	8.42158		hypothetical protein predicted by genemark.hmm; supported by cDNA: gi_14334897_gb_AY035122.1_
261022_at	At1g12260	0.288763	0.469824	0.00153135	0.00733473	0.0494655	0.0835225		NS	NS	NS		3.1038	3.06215	3.15446	3.14293		unknown protein similar to NAM like protein GB:CAA18122 GI:2961375 from [Arabidopsis thaliana]
259519_at	At1g12270	0.00289973	0.0790466	0.000986146	0.345257	0.000520743	0.884283		NS	0.000986146	0.000520743		6.23941	5.93504	5.96177	5.90316		hypothetical protein
259535_at	At1g12280	0.293379	0.000656276	0.271857	0.965504	0.878899	0.28092		NS	NS	NS		4.69813	4.7516	4.75688	4.6881		hypothetical protein
259534_at	At1g12290	0.339321	0.32143	0.382982	0.113197	0.260614	0.0674859		NS	NS	NS		3.38363	3.46953	3.30627	3.47265		hypothetical protein
259538_at	At1g12310	0.00357554	0.799911	0.00108996	0.89907	0.00262465	0.735648		NS	0.00108996	NS		8.32691	7.90495	7.80893	7.87304		putative serine/threonine kinase ; supported by cDNA: gi_15010571_gb_AY045587.1_
259520_at	At1g12320	0.841478	0.448889	0.704235	0.536345	0.474113	0.549819		NS	NS	NS		3.94859	3.97006	3.99679	3.86644		hypothetical protein
259528_at	At1g12330	0.0532964	0.395629	0.056086	0.567892	0.0444352	0.972503		NS	NS	NS		5.01616	4.72732	4.70732	4.72707		hypothetical protein
257513_s_at	At1g12340	0.0877448	0.219915	0.166682	0.986305	0.815986	0.114378		NS	NS	NS		4.76471	5.00337	4.96543	4.80624		hypothetical protein
259512_at	At1g12360	0.578536	0.691934	0.146608	0.981268	0.787764	0.969062		NS	NS	NS		6.85087	6.93291	7.08029	6.89027		hypothetical protein ; supported by cDNA: gi_12659317_gb_AF331066.1_AF331066
259537_at	At1g12370	0.415704	0.186485	0.130838	0.602021	0.936131	0.563199		NS	NS	NS		3.99177	3.85668	3.80561	3.98376		hypothetical protein ; supported by cDNA: gi_14334575_gb_AY034961.1_
259529_at	At1g12400	0.399959	0.965353	0.0927048	0.559925	0.321495	0.431422		NS	NS	NS		4.93975	5.12763	5.29589	5.10556		hypothetical protein
259521_at	At1g12410	0.0542138	0.134255	0.143389	0.15669	0.983002	0.249606		NS	NS	NS		9.18278	9.0975	9.12046	9.18394		ATP-dependent Clp protease proteolytic subunit (ClpR2) identical to nClpP2 GI:5360589 from [Arabidopsis thaliana]
259513_at	At1g12430	0.836417	0.77995	0.0346748	0.500088	0.43063	0.0180206		NS	NS	NS		4.3775	4.35791	4.55726	4.33254		hypothetical protein ; supported by cDNA: gi_9954167_gb_AF159052.1_AF159052
259530_at	At1g12450	0.413043	0.101352	0.0133179	0.684893	0.6481	0.545237		NS	NS	NS		4.61771	4.70498	4.8541	4.57212		hypothetical protein
259531_at	At1g12460	0.0622315	0.0695219	0.0398644	0.717039	0.0022583	0.329926		NS	NS	0.0022583		4.88135	4.63762	4.53461	4.44154		hypothetical protein
259532_at	At1g12470	0.699754	0.744216	0.836261	0.0978026	0.917466	0.768987		NS	NS	NS		6.0642	6.00852	6.04618	6.07884		hypothetical protein
259514_at	At1g12480	0.287509	0.765839	0.0351656	0.648266	0.0546615	0.990414		NS	NS	NS		3.83634	3.94696	4.06376	4.09467		hypothetical protein ; supported by cDNA: gi_15983365_gb_AF424557.1_AF424557
259522_at	At1g12490	0.760396	0.0753472	0.206506	0.288356	0.179356	0.991869		NS	NS	NS		3.17715	3.19933	3.07337	3.072		hypothetical protein
259523_at	At1g12500	0.46551	0.528565	0.548739	0.863007	0.0788456	0.897808		NS	NS	NS		6.04285	6.16093	5.94135	5.76523		hypothetical protein
259511_at	At1g12520	0.0147112	0.741102	0.162938	0.32053	0.178656	0.224775		NS	NS	NS		6.22226	7.32666	6.4237	6.47995		unknown protein contains similarity to copper zinc superoxide dismutase GI:5689611 from (Arabidopsis thaliana); supported by cDNA: gi_15215657_gb_AY050357.1_
259533_at	At1g12530	0.093619	0.264141	0.355114	0.669529	0.0596276	0.976031		NS	NS	NS		5.20364	5.40112	5.30531	5.44932		hypothetical protein
259524_at	At1g12550	0.100977	0.674092	0.591552	0.64311	0.0654973	0.272905		NS	NS	NS		4.61145	4.37584	4.52516	4.33615		hypothetical protein
259525_at	At1g12560	0.852565	0.940158	0.654138	0.263817	0.509949	0.897668		NS	NS	NS		3.46313	3.4856	3.42326	3.52661		hypothetical protein
259526_at	At1g12570	0.387961	0.222022	0.166715	0.482165	0.0516966	0.237155		NS	NS	NS		3.575	3.52058	3.4926	3.39974		hypothetical protein
259484_at	At1g12580	0.587277	0.698642	0.300227	0.107212	0.0820298	0.568973		NS	NS	NS		5.69198	5.63126	5.6308	5.52024		calcium-dependent protein kinase, putative similar to calcium-dependent protein kinase GI:5162877 from (Marchantia polymorpha); supported by cDNA: gi_16323175_gb_AY057692.1_
259527_at	At1g12600	0.407527	0.134025	0.564938	0.61703	0.24278	0.371272		NS	NS	NS		3.64281	3.74044	3.716	3.79451		hypothetical protein
255937_at	At1g12610	0.677694	0.499487	0.245127	0.99144	0.592262	0.667638		NS	NS	NS		3.29185	3.33733	3.16542	3.23839		transcriptional activator CBF1, putative similar to transcriptional activator CBF1 GI:1899058 from [Arabidopsis thaliana
255938_at	At1g12620	0.799496	0.88424	0.683074	0.133902	0.348319	0.78053		NS	NS	NS		3.43522	3.46271	3.3862	3.33185		hypothetical protein contains Pfam profile: PF01535 PPR repeat; supported by cDNA: gi_13605504_gb_AF361578.1_AF361578
255927_at	At1g12630	0.642025	0.430701	0.657365	0.00729305	0.325489	0.402138		NS	NS	NS		4.49637	4.53587	4.46639	4.5672		transcriptional activator CBF1, putative similar to transcriptional activator CBF1 GI:1899058 from [Arabidopsis thaliana]
255928_at	At1g12640	0.65309	0.571496	0.116808	0.259021	0.50995	0.699658		NS	NS	NS		6.59664	6.64309	6.76966	6.65935		unknown protein
255929_at	At1g12650	0.0916273	0.295616	0.227599	0.506354	0.410341	0.600297		NS	NS	NS		4.65686	4.40644	4.4795	4.54395		hypothetical protein predicted by genemark.hmm
255930_at	At1g12660	0.959304	0.082483	0.834733	0.180563	0.0108156	0.67479		NS	NS	NS		3.48281	3.47855	3.47001	3.62135		hypothetical protein predicted by genscan+
255936_at	At1g12680	0.142709	0.307639	0.993351	0.906824	0.0651506	0.431703		NS	NS	NS		5.16858	5.35426	5.16978	5.40281		calcium dependent protein kinase, putative similar to calcium dependent protein kinase GI:587499 from [Oryza sativa]
255935_at	At1g12700	0.882144	0.504105	0.780905	0.56523	0.644308	0.452005		NS	NS	NS		3.36121	3.37311	3.37995	3.32899		hypothetical protein contains Pfam profile: PF01535 PPR repeat
255931_at	At1g12710	0.000203632	0.657399	0.000196333	0.327883	0.000694681	0.401912		0.000203632	0.000196333	0.000694681		5.76733	6.80103	6.81608	6.58785		hypothetical protein similar to putative phloem-specific lectin GI:3894166 from [Arabidopsis thaliana]
255932_at	At1g12720	0.883891	0.349332	0.247967	0.326789	0.138249	0.529419		NS	NS	NS		3.18275	3.17428	3.25624	3.26273		mutator-like transposase, putative similar to mutator-like transposase GI:4388821 from [Arabidopsis thaliana]
255939_at	At1g12730	0.00333781	0.721879	0.00258093	0.793825	0.00479705	0.427044		NS	NS	NS		4.87887	5.52863	5.53169	5.48319		hypothetical protein predicted by genemark.hmm; supported by cDNA: gi_13877978_gb_AF370252.1_AF370252
255934_at	At1g12740	0.0770739	0.0818566	0.496629	0.638209	0.0546009	0.374446		NS	NS	NS		2.98889	2.89492	3.02188	3.12919		cytochrome P450, putative similar to cytochrome P450 GI:4176420 from [Arabidopsis thaliana]
255933_at	At1g12750	0.0382049	0.806763	0.272176	0.796889	0.0296512	0.805635		NS	NS	NS		6.71436	6.85868	6.77851	6.93165		membrane protein, putative similar to membrane protein GI:294845 from [Saccharum hybrid cultivar H65-7052]
261194_at	At1g12770	0.186859	0.81782	0.266676	0.100882	0.102893	0.370882		NS	NS	NS		3.10751	3.19255	3.21038	3.22377		unknown protein contains Pfam profiles: PF00270 DEAD/DEAH box helicase, PF00271 helicase conserved C-terminal domain PF01535 PPR repeat
261211_at	At1g12780	0.0213032	0.926918	0.0398441	0.896216	0.0551617	0.653939		NS	NS	NS		6.90218	7.38979	7.32834	7.30214		uridine diphosphate glucose epimerase identical to GB:CAA90941 from [Arabidopsis thaliana] (Arch. Biochem. Biophys. 327 (1), 27-34 (1996)); supported by cDNA: gi_15809879_gb_AY054207.1_
261205_at	At1g12790	0.0234806	0.553896	0.265843	0.114752	0.0552473	0.964715		NS	NS	NS		3.7882	4.00116	3.86861	3.96137		hypothetical protein predicted by genemark.hmm;supported by full-length cDNA: Ceres:6609.
261206_at	At1g12800	0.555058	0.307574	0.870946	0.548351	0.29287	0.155802		NS	NS	NS		8.66221	8.71824	8.64217	8.75882		heat shock factor protein hsf8, putative predicted by genemark.hmm; supported by cDNA: gi_15028376_gb_AY045991.1_
261209_at	At1g12810	0.15412	0.452867	0.0889941	0.405178	0.763811	0.915253		NS	NS	NS		5.74682	5.48562	5.46892	5.69489		unknown protein ; supported by cDNA: gi_15450466_gb_AY052334.1_
261195_at	At1g12820	0.157816	0.377856	0.67912	0.907794	0.753166	0.969545		NS	NS	NS		6.77798	6.63501	6.73619	6.80871		transport inhibitor response 1 (TIR1), putative similar to transport inhibitor response 1 GI:2352492 from [Arabidopsis thaliana]
261207_at	At1g12830	0.360906	0.897094	0.704652	0.102323	0.214246	0.173549		NS	NS	NS		4.27181	4.17453	4.23216	4.1024		peroxisomal targeting signal type 2 receptor ; supported by cDNA: gi_15215675_gb_AY050366.1_
261210_at	At1g12840	0.0153777	0.473092	0.0175322	0.378324	0.000994575	0.839278		NS	NS	0.000994575		9.33951	9.11188	9.10961	9.0436		vacuolar ATP synthase subunit C, putative similar to GB:AAF20146 from [Arabidopsis thaliana] (Genes Dev. (1999) In press); supported by cDNA: gi_6636331_gb_AF208261.1_AF208261
261203_at	At1g12845	0.00709037	0.959323	0.026698	0.621926	0.00278939	0.729225		NS	NS	NS		7.1703	7.91113	7.69214	7.97542		Expressed protein ; supported by full-length cDNA: Ceres: 13526.
261201_at	At1g12850	0.605567	0.916414	0.991686	0.386693	0.648805	0.240394		NS	NS	NS		7.27987	7.21319	7.28106	7.22326		unknown protein ;supported by full-length cDNA: Ceres:207684.
261196_at	At1g12860	0.117171	0.805508	0.23457	0.145209	0.0326795	0.603631		NS	NS	NS		5.91909	6.06218	6.02596	6.18008		unknown protein
261212_at	At1g12880	0.633398	0.703187	0.781889	0.649526	0.242172	0.0508628		NS	NS	NS		4.43478	4.38196	4.47025	4.5695		hypothetical protein predicted by genemark.hmm; supported by cDNA: gi_15810278_gb_AY056178.1_
261197_at	At1g12900	0.864429	0.637464	0.834047	0.90122	0.866438	0.62018		NS	NS	NS		11.9604	11.9488	11.939	11.9766		putative calcium-binding protein, calreticulin similar to SP:P12858 from [Arabidopsis thaliana]
261202_at	At1g12910	0.24688	0.923821	0.719706	0.139685	0.994675	0.730924		NS	NS	NS		6.84101	6.74766	6.811	6.84171		flower pigmentation protein ATAN11 identical to GB:AAC18912 from [Arabidopsis thaliana] (Genes Dev. 11 (11), 1422-1434 (1997));supported by full-length cDNA: Ceres:37574.
261208_at	At1g12930	0.645603	0.386458	0.482461	0.817562	0.981842	0.987442		NS	NS	NS		4.47237	4.43297	4.38879	4.47427		unknown protein ; supported by cDNA: gi_15215745_gb_AY050402.1_
261198_at	At1g12940	0.766317	0.736463	0.574633	0.674869	0.982068	0.208966		NS	NS	NS		3.35663	3.33143	3.30625	3.35859		nitrate transporter, putative similar to GB:CAB09794 from [Arabidopsis thaliana]
261199_at	At1g12950	0.0508426	0.722056	0.781553	0.461175	0.489935	0.769261		NS	NS	NS		3.32932	3.1719	3.34792	3.27483		unknown protein
261200_at	At1g12960	0.130344	0.283605	0.0122909	0.914826	0.240983	0.954681		NS	NS	NS		3.93242	3.82866	3.71986	3.82045		60S ribosomal protein L27a, putative similar to GB:BAA96068 from [Panax ginseng]
261213_at	At1g12970	0.473548	0.302212	0.511297	0.554831	0.84058	0.523596		NS	NS	NS		3.67661	3.5967	3.75787	3.69727		unknown protein ; supported by cDNA: gi_17063164_gb_AY062103.1_
262768_at	At1g12990	0.0265786	0.0516367	0.00616021	0.105247	0.599745	0.567797		NS	NS	NS		6.27961	6.55005	6.75455	6.2139		putative beta-1,4-N-acetylglucosaminyltransferase contains similarity to gi|4417304 F15O11.7 putative beta-1,4-mannosyl-glycoprotein beta-1,4-N-acetylglucosaminyltransferase from Arabidopsis thaliana BAC gb|AC006446
262775_at	At1g13000	0.157717	0.377501	0.817005	0.634839	0.425743	0.566367		NS	NS	NS		5.69813	5.54411	5.73132	5.56221		unknown protein
262776_at	At1g13020	0.19657	0.373094	0.348011	0.174032	0.485186	0.768311		NS	NS	NS		5.5897	5.44227	5.66309	5.50197		unknown protein EST gb|T22808 comes from this gene
262777_at	At1g13030	0.166967	0.775721	0.333332	0.556033	0.0773438	0.512931		NS	NS	NS		4.46131	4.28097	4.35383	4.23744		hypothetical protein predicted by genscan
257465_at	At1g13040	0.349252	0.392516	0.193551	0.460703	0.847625	0.127992		NS	NS	NS		2.8476	2.80143	2.91791	2.83673		hypothetical protein predicted by genscan
262778_at	At1g13050	0.415821	0.33296	0.531729	0.606956	0.508135	0.466855		NS	NS	NS		3.2815	3.20598	3.21952	3.21274		hypothetical protein predicted by genefinder
262781_s_at	At1g13060	0.26473	0.661153	0.323343	0.149991	0.741616	0.823698		NS	NS	NS		8.88957	8.81034	8.81213	8.91992		proteasome epsilon chain precursor identical to GB:O23717;supported by full-length cDNA: Ceres:33591.
262779_at	At1g13070	0.00127343	0.0359472	0.0566787	0.110401	0.185345	0.948771		0.00127343	NS	NS		3.49267	3.6727	3.57358	3.57228		putative cytochrome P450 monooxygenase strong similarity to gb|D78605 cytochrome P450 monooxygenase from Arabidopsis thaliana and is a member of the PF|00067 Cytochrome P450 family
262826_at	At1g13080	0.562792	0.329036	0.539691	0.631971	0.682431	0.97714		NS	NS	NS		4.75723	4.84504	4.86718	4.82846		putative cytochrome P450 monooxygenase identical to gb|D78605 cytochrome P450 monooxygenase from Arabidopsis thaliana and is a member of the PF|00067 Cytochrome P450 family. ESTs gb|Z18072, gb|Z35218 and gb|T43466 come from this gene; supported by cDNA: gi_3164139_dbj_D78605.1_D78605
262780_at	At1g13090	0.174024	0.732742	0.069761	0.617988	0.00844279	0.635528		NS	NS	NS		6.49044	6.69298	6.70738	6.92854		putative cytochrome P450 monooxygenase strong similarity to gb|X97864 cytochrome P450 from Arabidopsis thaliana and is a member of the PF|00067 Cytochrome P450 family. ESTs gb|N65665, gb|T14112, gb|T76255, gb|T20906 and gb|AI100027 come from this gene;supported by full-length cDNA: Ceres:35385
262827_at	At1g13100	0.000278159	0.17623	0.00544111	0.912065	0.0466528	0.515467		0.000278159	NS	NS		4.50944	4.93034	4.75477	4.67027		putative cytochrome P450 monooxygenase strong similarity to gb|X97864 cytochrome P450 from Arabidopsis thaliana and is a member of the PF|00067 Cytochrome P450 family
262793_at	At1g13110	0.0438263	0.200281	0.153712	0.606285	0.0564302	0.242429		NS	NS	NS		8.93688	9.17233	9.07828	9.16794		putative cytochrome P450 monooxygenase identical to gb|X97864 cytochrome P450 from Arabidopsis thaliana and is a member of the PF|00067 Cytochrome P450 family. ESTs gb|T44875, gb|T04814, gb|R65111, gb|T44310 and gb|T04541 come from this gene
262794_at	At1g13120	0.856092	0.341527	0.603144	0.157193	0.801662	0.180839		NS	NS	NS		5.72042	5.73651	5.6765	5.68963		unknown protein EST gb|N37870 comes from this gene
262795_at	At1g13130	0.311447	0.840316	0.843722	0.805936	0.0324428	0.866904		NS	NS	NS		3.39975	3.3435	3.38887	3.51768		hypothetical protein predicted by genscan
262764_at	At1g13140	0.407788	0.406723	0.149586	0.810779	0.526797	0.921477		NS	NS	NS		3.1525	3.09148	3.04898	3.10708		putative cytochrome P450 monooxygenase strong similarity to gi|3313615 F21J9.9 from Arabidopsis thaliana and is a member of the PF|00067 Cytochrome P450 family
262765_at	At1g13150	0.13697	0.260471	0.0785584	0.727288	0.371555	0.422414		NS	NS	NS		3.11043	3.04342	3.00915	3.04488		putative cytochrome P450 monooxygenase strong similarity to gi|3313615 F21J9.9 from Arabidopsis thaliana and is a member of the PF|00067 Cytochrome P450 family
262766_at	At1g13160	0.068576	0.524342	0.177512	0.215792	0.0372964	0.228556		NS	NS	NS		4.35386	4.0574	4.15408	4.0462		hypothetical protein predicted by genscan
262767_at	At1g13170	0.886243	0.913828	0.607784	0.823309	0.937467	0.757633		NS	NS	NS		4.75055	4.72732	4.66401	4.76578		putative oxysterol-binding protein similar to gb|M86917 oxysterol-binding protein from Homo sapiens
262769_at	At1g13180	0.0064045	0.316916	0.0308827	0.854715	0.162991	0.590915		NS	NS	NS		5.20146	4.84169	5.03199	5.09064		actin-like protein strong similarity to gb|U29610 Actin-like protein (Arp3) from Acanthamoeba castellanii and is a member of the PF|00022 Actin family
262770_at	At1g13190	0.653681	0.986524	0.834611	0.913057	0.144525	0.913804		NS	NS	NS		5.6717	5.71868	5.64897	5.76878		hypothetical protein predicted by genscan
262782_at	At1g13195	0.22574	0.800659	0.15655	0.367446	0.188647	0.575911		NS	NS	NS		4.69046	4.86784	4.87335	4.86693		Expressed protein ; supported by full-length cDNA: Ceres: 36399.
262771_at	At1g13200	0.509471	0.0508444	0.252287	0.197641	0.28683	0.202415		NS	NS	NS		3.40145	3.35061	3.30568	3.28668		hypothetical protein predicted by genscan
262772_at	At1g13210	0.789216	0.191994	0.0381702	0.84514	0.321057	0.439989		NS	NS	NS		6.16763	6.10367	6.66073	6.38707		puative calcium-transporting ATPase similar to gb|AF038007 FIC1 gene from Homo sapiens and is a member of the PF|00122 E1-E2 ATPase family. ESTs gb|T45045 and gb|AA394473 come from this gene
262773_at	At1g13220	0.0212354	0.67932	0.0210432	0.0116583	0.21491	0.356505		NS	NS	NS		4.15495	4.40559	4.36084	4.28905		putative nuclear matrix constituent protein similar to gb|D64087 nuclear matrix constituent protein 1 (NMCP1) from Daucus carota
262774_at	At1g13230	0.73946	0.747384	0.527756	0.833314	0.934795	0.875807		NS	NS	NS		3.33319	3.36549	3.2831	3.32655		chloroplast nucleoid DNA binding protein, putative contains similarity to gb|U42445 Cf-2.2 from Lycopersicon pimpinellifolium and contains 5 PF|00560 Leucine rich repeat domains
259358_at	At1g13250	0.351103	0.330002	0.889801	0.585704	0.651439	0.54799		NS	NS	NS		5.16077	5.00406	5.18253	5.09274		hypothetical protein similar to putative glycosyl transferase GI:6862930 from [Arabidopsis thaliana];supported by full-length cDNA: Ceres:117402.
259364_at	At1g13260	0.0360673	0.598053	0.0580445	0.645762	0.0574431	0.705974		NS	NS	NS		5.34983	6.11676	5.96537	5.92899		DNA-binding protein RAV1 identical to RAV1 GI:3868857 from [Arabidopsis thaliana]; supported by cDNA: gi_3868856_dbj_AB013886.1_AB013886
259363_at	At1g13270	0.00075234	0.241212	0.00108033	0.873167	0.000424737	0.181125		0.00075234	0.00108033	0.000424737		8.45075	8.1972	8.19391	8.15912		methionine aminopeptidase I (MAP1), putative similar to methionine aminopeptidase I (MAP1) GI:975722 from [Saccharomyces cerevisiae]; supported by cDNA: gi_11320955_gb_AF250961.1_AF250961
259366_at	At1g13280	0.00190248	0.9781	0.00305082	0.966021	0.0275077	0.598658		0.00190248	NS	NS		6.3496	6.83356	6.81632	6.73313		allene oxide cyclase, putative similar to allene oxide cyclase GI:8977961 from [Lycopersicon esculentum]; supported by cDNA: gi_16323064_gb_AY057636.1_
257515_at	At1g13290	0.586531	0.0750765	0.324736	0.970951	0.367173	0.371487		NS	NS	NS		3.79694	3.75139	3.69478	3.88781		zinc finger protein, putative similar to zinc finger protein ID1 GI:3170601 from [Zea mays]
259365_at	At1g13300	0.332475	0.0117237	0.387883	0.486389	0.0673278	0.408161		NS	NS	NS		3.55012	3.59838	3.61602	3.68082		unknown protein ; supported by cDNA: gi_13605874_gb_AF367336.1_AF367336
259360_at	At1g13310	0.912281	0.285579	0.44386	0.816176	0.0612715	0.695124		NS	NS	NS		2.93567	2.94362	2.98314	3.08348		hypothetical protein predicted by genemark.hmm; supported by full-length cDNA: Ceres: 259726.
259407_at	At1g13320	0.384366	0.891002	0.574669	0.846665	0.33227	0.502816		NS	NS	NS		7.39398	7.4931	7.36004	7.44828		protein phosphatase 2A regulatory subunit, putative similar to protein phosphatase 2A regulatory subunit GI:683502 from [Arabidopsis thaliana]
259409_at	At1g13330	0.568948	0.472494	0.341229	0.0108464	0.130318	0.154853		NS	NS	NS		2.96495	2.92439	2.99644	2.91352		hypothetical protein contains similarity to TBP-1 interacting protein GI:7328534 from [Homo sapiens]
259410_at	At1g13340	0.0964059	0.156244	0.393695	0.152576	0.646767	0.68597		NS	NS	NS		3.7159	3.5176	3.63159	3.66734		hypothetical protein predicted by genemark.hmm
259362_s_at	At1g13350	0.162949	0.769019	0.100373	0.349913	0.0212585	0.144327		NS	NS	NS		5.3147	5.5041	5.56166	5.64935		serin threonin-kinase, putative similar to serin threonin-kinase GI:2887282 from (Drosophila melanogaster); supported by cDNA: gi_15450801_gb_AY054481.1_
259387_at	At1g13370	0.268805	0.288573	0.115105	0.328429	0.338124	0.46182		NS	NS	NS		3.30196	3.23077	3.20961	3.24047		histone H3 protein, putative similar to histone 3 protein GI:169792 from (Oryza sativa);supported by full-length cDNA: Ceres:268982.
259357_at	At1g13380	0.359408	0.671778	0.663456	0.969668	0.741742	0.290458		NS	NS	NS		5.81057	5.95935	5.87055	5.86484		unknown protein ;supported by full-length cDNA: Ceres:5232.
259386_at	At1g13400	0.985029	0.0873304	0.524551	0.375124	0.612918	0.850867		NS	NS	NS		3.47982	3.47857	3.42036	3.5253		hypothetical protein contains similarity to zinc finger protein GI:790683 from (Arabidopsis thaliana)
259411_at	At1g13410	0.514279	0.0830286	0.857915	0.193098	0.101382	0.0672739		NS	NS	NS		3.49635	3.43478	3.47975	3.33192		hypothetical protein contains Pfam profile: PF01535 PPR repeat
259388_at	At1g13420	0.875704	0.854391	0.953259	0.715118	0.185887	0.947456		NS	NS	NS		3.06365	3.07636	3.05915	2.96062		steroid sulfotransferase, putative similar to steroid sulfotransferase 1 GI:3420004 from (Brassica napus);supported by full-length cDNA: Ceres:150484.
259361_at	At1g13440	0.133254	0.821317	0.423636	0.250795	0.282456	0.640815		NS	NS	NS		11.4666	11.3741	11.4172	11.3632		glyceraldehyde-3-phosphate dehydrogenase, putative similar to glyceraldehyde-3-phosphate dehydrogenase GI:21143 from (Sinapis alba); supported by cDNA: gi_15146235_gb_AY049259.1_
259412_at	At1g13450	0.255347	0.257087	0.17299	0.216803	0.486603	0.76896		NS	NS	NS		5.72105	5.83873	5.8672	5.78644		DNA binding protein GT-1, putative similar to DNA binding protein GT-1 GI:598073 from (Arabidopsis thaliana)
259359_at	At1g13460	0.0012364	0.993348	0.0437029	0.0330813	0.0955873	0.239448		0.0012364	NS	NS		5.79017	5.47356	5.54614	5.60536		B regulatory subunit of protein phosphatase 2A, putative similar to B regulatory subunit of protein phosphatase 2A GI:2160694 from (Arabidopsis thaliana);supported by full-length cDNA: Ceres:126195.
259385_at	At1g13470	0.0399174	0.710545	0.552348	0.351804	0.0474729	0.899426		NS	NS	NS		5.52823	4.35583	5.24606	4.43185		hypothetical protein predicted by genscan+
256103_at	At1g13540	0.157649	0.180109	0.220666	0.557273	0.435515	0.287145		NS	NS	NS		2.79027	2.89911	2.87575	2.85658		hypothetical protein similar to hypothetical protein GI:9802750 from [Arabidopsis thaliana]
256134_at	At1g13560	0.332754	0.0761711	0.968237	0.177475	0.525902	0.52122		NS	NS	NS		7.93482	8.00168	7.93754	7.97911		aminoalcoholphosphotransferase identical to aminoalcoholphosphotransferase GI:3661593 from [Arabidopsis thaliana]; supported by cDNA: gi_3661592_gb_AF091843.1_AF091843
256133_at	At1g13570	0.0570079	0.567631	0.0521691	0.808352	0.804388	0.358485		NS	NS	NS		4.80137	5.07787	5.0765	4.82867		hypothetical protein predicted by genemark.hmm
256157_at	At1g13580	0.149212	0.456786	0.249084	0.925658	0.0623761	0.50324		NS	NS	NS		4.46069	4.29646	4.33332	4.16355		longevity assurance protein, putative similar to longevity assurance protein GI:7658241 from [Arabidopsis thaliana]
256158_at	At1g13590	0.831838	0.503052	0.403965	0.874196	0.628294	0.797138		NS	NS	NS		3.6098	3.62523	3.66907	3.65137		hypothetical protein contains similarity to NADPH-cytochrome P450 reductase GI:10442765 from [NADPH-cytochrome P450 reductase]
256131_at	At1g13600	0.49443	0.53824	0.410369	0.383522	0.0938434	0.593373		NS	NS	NS		2.94169	3.01418	2.89575	2.84074		bZIP transcription factor, putative similar to bZIP transcription factor GI:1769891 from [Arabidopsis thaliana]
256132_at	At1g13610	0.511491	0.41615	0.0245446	0.452721	0.18534	0.448561		NS	NS	NS		3.74851	3.80212	3.96967	3.86688		hypothetical protein similar to hypothetical protein GI:4337191 from [Arabidopsis thaliana]
256095_at	At1g13630	0.776162	0.492599	0.524388	0.604433	0.114296	0.348037		NS	NS	NS		2.98657	3.00996	2.94209	2.85792		hypothetical protein contains Pfam profile: PF01535 PPR repeat
256071_at	At1g13640	0.00384741	0.358227	0.0367968	0.465802	0.0149528	0.752947		NS	NS	NS		5.9692	5.31973	5.5509	5.44818		ubiquitin, putative similar to ubiquitin GI:10177083 from [Arabidopsis thaliana]; supported by cDNA: gi_16974595_gb_AY060574.1_
256096_at	At1g13650	0.466498	0.319066	0.277838	0.580297	0.837456	0.549889		NS	NS	NS		4.68004	4.88514	4.31658	4.61514		unknown protein
256097_at	At1g13670	0.42431	0.685709	0.805101	0.3182	0.49672	0.574393		NS	NS	NS		3.24176	3.16924	3.21534	3.29401		unknown protein
256102_at	At1g13680	0.542861	0.719732	0.262677	0.160143	0.472888	0.634805		NS	NS	NS		2.91682	2.96719	3.0014	2.98393		unknown protein
256068_at	At1g13690	0.342282	0.657402	0.413827	0.580589	0.414059	0.0185407		NS	NS	NS		6.3592	6.47376	6.2748	6.44097		hypothetical protein contains similarity to peptidyl-prolyl cis-trans isomerase E GI:4406227 from [Homo sapiens]; supported by cDNA: gi_1498063_gb_U64825.1_ATU64825
256098_at	At1g13700	0.00222558	0.188562	0.0117495	0.694668	0.0827574	0.298417		0.00222558	NS	NS		4.37373	5.22251	5.00327	4.67902		unknown protein similar to 6-phosphogluconolactonase-like protein GI:10177902 from [Arabidopsis thaliana]
256099_at	At1g13710	0.414697	0.793786	0.82082	0.0981472	0.595892	0.261644		NS	NS	NS		3.42948	3.35319	3.44677	3.4837		cytochrome P450, putative similar to cytochrome P450 GI:349717 from [Zea mays]
256070_at	At1g13730	0.731694	0.0580944	0.966886	0.83209	0.999739	0.856443		NS	NS	NS		5.28995	5.23997	5.28352	5.29		hypothetical protein predicted by genscan+; supported by cDNA: gi_16648784_gb_AY058169.1_
256069_at	At1g13740	0.942036	0.208233	0.56814	0.275759	0.145543	0.455616		NS	NS	NS		4.97439	4.9829	4.92166	5.13038		hypothetical protein predicted by genscan+; supported by cDNA: gi_15810574_gb_AY056326.1_
256100_at	At1g13750	0.522773	0.501629	0.337239	0.61366	0.920064	0.753948		NS	NS	NS		5.92171	5.74938	6.16167	5.89538		unknown protein
256101_at	At1g13760	0.459113	0.469126	0.93886	0.812634	0.779307	0.133154		NS	NS	NS		3.13631	3.07887	3.14218	3.1171		hypothetical protein predicted by genscan+
259448_at	At1g13790	0.0180434	0.218546	0.784918	0.738981	0.959245	0.65052		NS	NS	NS		3.28623	3.13937	3.29984	3.29082		hypothetical protein similar to transcription factor X1-like protein GI:9294370 from [Arabidopsis thaliana]
259449_at	At1g13800	0.679983	0.882345	0.418307	0.512538	0.663258	0.309566		NS	NS	NS		3.32868	3.35771	3.2432	3.29462		hypothetical protein similar to putative salt-inducible protein GI:3426046 from [Arabidopsis thaliana]
259422_at	At1g13810	0.21629	0.481943	0.735492	0.246611	0.346105	0.845001		NS	NS	NS		3.85637	3.98287	3.91419	3.76656		unknown protein
259424_at	At1g13830	0.588874	0.209381	0.656843	0.306864	0.152916	0.533713		NS	NS	NS		3.46933	3.51571	3.50683	3.61916		hypothetical protein contains similarity to beta 1,3-glucanase (Glc1) GI:924952 from [Triticum aestivum]
259450_at	At1g13870	0.634864	0.788193	0.658118	0.417252	0.0436913	0.908052		NS	NS	NS		5.3195	5.38959	5.25608	4.96804		hypothetical protein predicted by genemark.hmm
259423_at	At1g13880	0.37822	0.810098	0.36068	0.312847	0.0110142	0.144922		NS	NS	NS		5.51423	5.42349	5.40163	5.30181		unknown protein similar to putative MYB family transcription factor GI:4335752 from [Arabidopsis thaliana]
259451_at	At1g13890	0.990406	0.304342	0.931189	0.288849	0.0632546	0.824658		NS	NS	NS		2.96775	2.96851	2.96241	2.83386		synaptosomal associated protein (SNAP25A), putative similar to SNAP25A protein GI:9759467 from [Arabidopsis thaliana]
259420_at	At1g13900	0.0352756	0.926664	0.419098	0.209452	0.0512223	0.81297		NS	NS	NS		6.84309	6.65097	6.77879	6.66299		hypothetical protein similar to putative purple acid phosphatase GB:AAD17431 GI:4335754 from [Arabidopsis thaliana]
259421_at	At1g13910	0.18217	0.890496	0.635505	0.598005	0.232104	0.0653638		NS	NS	NS		4.28933	4.45793	4.34667	4.44247		disease resistance protein, putative similar to disease resistance protein GB:AAC78591 GI:3894383 from [Lycopersicon esculentum]
262662_at	At1g13920	0.0726704	0.673115	0.156487	0.70696	0.0109238	0.650452		NS	NS	NS		3.54432	3.88102	3.71205	3.93255		hypothetical protein similar to hypothetical protein GB:AAD39278 GI:5080768 from (Arabidopsis thaliana)
262609_at	At1g13930	0.469487	0.583584	0.7151	0.865591	0.151634	0.801552		NS	NS	NS		13.0637	13.1353	13.098	13.2213		unknown protein ;supported by full-length cDNA: Ceres:1505.
262663_at	At1g13940	0.0013955	0.508507	0.00191343	0.106278	0.0751482	0.564456		0.0013955	NS	NS		4.41813	4.93906	4.80132	4.6611		hypothetical protein identical to hypothetical protein GB:AAD39280 GI:5080770 from (Arabidopsis thaliana)
262615_at	At1g13950	0.0285755	0.254038	0.0467181	0.994551	0.146634	0.922817		NS	NS	NS		5.00465	4.51874	4.50878	4.66671		initiation factor 5A-4 identical to initiation factor 5A-4 GB:AAD39281 GI:5080771 from (Arabidopsis thaliana); supported by cDNA: gi_12407784_gb_AF296082.1_AF296082
262613_at	At1g13960	0.00986384	0.964913	0.00339371	0.483823	0.0132322	0.132422		NS	NS	NS		4.97979	5.24723	5.27245	5.21243		putative DNA-binding protein similar to WKRY DNA-binding protein GB:AAD17441; supported by cDNA: gi_15010749_gb_AY045676.1_
262664_at	At1g13970	0.859151	0.544941	0.603368	0.348783	0.700827	0.491212		NS	NS	NS		2.93804	2.94877	2.95893	2.92091		hypothetical protein predicted by genemark.hmm
262614_at	At1g13980	0.00143229	0.977046	0.00156692	0.113467	0.0161184	0.659055		0.00143229	NS	NS		6.10344	6.46554	6.48602	6.31147		putative pattern formation protein EMB30 highly similar to GB:Q42510; supported by cDNA: gi_1209630_gb_U36432.1_ATU36432
262607_at	At1g13990	0.00413087	0.788999	0.000751058	0.401989	0.00180573	0.770419		NS	0.000751058	0.00180573		6.6055	7.11933	7.24651	7.35118		unknown protein ;supported by full-length cDNA: Ceres:93312.
262660_at	At1g14000	0.595494	0.43557	0.376998	0.411243	0.399345	0.145944		NS	NS	NS		7.8071	7.75331	7.88699	7.72647		putative protein kinase
262647_at	At1g14020	0.0118704	0.986938	0.0196899	0.581378	0.0490287	0.950275		NS	NS	NS		5.10859	4.73562	4.7941	4.82945		putative growth regulator protein similar to Nicotiana tabacum auxin-independent growth promoter, axi 1 gi|559921
262648_at	At1g14030	0.0402773	0.0237665	0.183707	0.920551	0.00924466	0.568303		NS	NS	NS		6.92875	7.12532	7.09241	7.22848		putative ribulose-1,5 bisphosphate carboxylase/oxygenase large subunit N-methyltransferase highly similar to ribulose-1,5 bisphosphate carboxylase/oxygenase large subunit N-methyltransferase, gi|1731475. Rare GC intron splice site at 49572 is inferred from protein alignment and is not confirmed experimentally
262649_at	At1g14040	0.00787409	0.466658	0.893489	0.18709	0.0474402	0.843367		NS	NS	NS		3.98671	3.75197	3.97656	3.80379		unknown protein contains similarity to xenotropic and polytropic retrovirus receptor GB:4759334
262611_at	At1g14050	0.0250972	0.305087	0.00812307	0.724732	0.0326102	0.391997		NS	NS	NS		4.17183	3.86806	3.79328	3.89547		Expressed protein ; supported by full-length cDNA: Ceres: 29867.
262665_at	At1g14070	0.857744	0.44243	0.69598	0.362888	0.813087	0.579058		NS	NS	NS		3.24619	3.22874	3.21612	3.2637		xyloglucan fucosyltransferase, putative similar to xyloglucan fucosyltransferase GI:5231145 from (Arabidopsis thaliana)
262666_at	At1g14080	0.121961	0.745302	0.0743269	0.536738	0.105501	0.142045		NS	NS	NS		3.29505	3.12425	3.10124	3.13972		xyloglucan fucosyltransferase, putative similar to xyloglucan fucosyltransferase GI:5231145 from (Arabidopsis thaliana)
262650_at	At1g14090	0.100343	0.0329314	0.121821	0.668781	0.070976	0.245634		NS	NS	NS		3.01324	3.11302	3.12317	3.12566		lipoamide dehydrogenase, putative
262651_at	At1g14100	0.749353	0.611368	0.211907	0.487517	0.825695	0.572483		NS	NS	NS		3.42686	3.38515	3.28891	3.40245		hypothetical protein One of a cluster of 4 hypothetical proteins (F7A19.15, F7A19.16, F7A19.18, F7A19.19) highly related (80% identity at the DNA level) proteins
262652_at	At1g14110	0.303466	0.933621	0.229876	0.276204	0.53015	0.498719		NS	NS	NS		3.36438	3.2962	3.4131	3.33052		hypothetical protein One of a cluster of 4 hypothetical proteins (F7A19.15, F7A19.16, F7A19.18, F7A19.19) highly related (80% identity at the DNA level) proteins
262608_at	At1g14120	0.910305	0.891908	0.533921	0.683597	0.859083	0.171539		NS	NS	NS		2.97477	2.98501	3.02465	2.96022		dioxygenase-like protein very similar to adventitious rooting related oxygenase; Very similar to 2-oxoacid dependent dioxygenase from Malus domestica, gi|3492806;supported by full-length cDNA: Ceres:14139.
262653_at	At1g14130	0.0245326	0.357298	0.561563	0.915477	0.356886	0.0451998		NS	NS	NS		4.01187	4.24761	4.05955	3.93147		dioxygenase-like protein very similar to adventitious rooting related oxygenase; Very similar to 2-oxoacid dependent dioxygenase from Malus domestica, gi|3492806
262610_at	At1g14140	0.0615713	0.442113	0.0528471	0.648074	0.00461061	0.118513		NS	NS	NS		5.79192	5.41592	5.64177	5.50231		putative mitochondrial uncoupling protein similar to mitochondrial carrier proteins; Similar to human uncoupling protein 4 gi|4324701.~Contains Mitochondrial energy transfer proteins motif; supported by full-length cDNA: Ceres: 108174.
262612_at	At1g14150	0.0803625	0.371624	0.147963	0.936732	0.48948	0.735241		NS	NS	NS		9.89239	9.58836	9.66147	9.79137		unknown protein location of ESTs 144D22XP 3 , gb|AA404877 and 144D22T7, gb|T75757;supported by full-length cDNA: Ceres:5665.
262654_at	At1g14180	0.71439	0.955557	0.115283	0.781294	0.338715	0.0829914		NS	NS	NS		4.3399	4.37963	4.20427	4.25466		putative mandelonitrile lyase similar to mandelonitrile lyases GB:P52707, P52706, and O50048; contains MC oxidoreductases protein motif
262655_s_at	At1g14190	0.0522175	0.331035	0.0235759	0.320298	0.11175	0.278379		NS	NS	NS		2.78331	3.02771	2.93913	2.88698		putative mandelonitrile lyase similar to mandelonitrile lyases GB:P52707, P52706, and O50048; contains MC oxidoreductases protein motif
262656_at	At1g14200	0.0775317	0.728019	0.169612	0.827974	0.217137	0.718612		NS	NS	NS		5.59268	5.23564	5.30942	5.35966		unknown protein location of EST TAT5A03; 5 end, gb|Z26679
262657_at	At1g14210	0.393881	0.858212	0.517966	0.69407	0.472253	0.866195		NS	NS	NS		5.08194	5.22772	4.96073	4.92708		ribonuclease contains similarity to RNase GI:7768564 from [Nicotiana tabacum]
262658_at	At1g14220	0.00794715	0.0123205	0.580311	0.151802	0.00330644	0.0586247		NS	NS	NS		2.99408	3.16394	2.96936	3.16567		ribonuclease contains similarity to S-like ribonuclease PD1 GI:9957752 from [Prunus dulcis]; contains ribonuclease T2 family histidine protein motif
262659_at	At1g14240	0.0509741	0.782474	0.451455	0.220833	0.356595	0.374792		NS	NS	NS		3.28156	3.4543	3.34259	3.36821		putative nucleoside triphosphatase similar to GB:AAC32915, contains GDA1/CD39 family of nucleoside phosphatases protein motif
262661_s_at	At1g14250	9.38624e-07	2.69904e-05	0.0391276	0.0995068	0.823812	0.0870884		9.38624e-07	NS	NS		4.05408	5.17022	4.50341	4.07159		hypothetical protein
261481_at	At1g14260	0.607523	0.462019	0.376151	0.826814	0.208184	0.0201054		NS	NS	NS		3.52482	3.55601	3.59318	3.61979		nucleoside triphosphatase, putative similar to nucleoside triphosphatase GI:563611 from [Pisum sativum];supported by full-length cDNA: Ceres:118756.
261483_at	At1g14270	0.517799	0.266651	0.505285	0.524739	0.604235	0.568041		NS	NS	NS		7.86137	7.8098	7.90744	7.89709		hypothetical protein predicted by genemark.hmm;supported by full-length cDNA: Ceres:36233.
261480_at	At1g14280	2.2e-05	0.413948	0.000597648	0.963358	0.00355501	0.571547		2.2e-05	0.000597648	NS		7.18109	8.16155	7.97133	7.59786		phytochrome kinase substrate 1, putative similar to phytochrome kinase substrate 1 GI:5020168 from [Arabidopsis thaliana];supported by full-length cDNA: Ceres:97569.
261492_at	At1g14290	0.940431	0.368386	0.755185	0.847215	0.0639818	0.93473		NS	NS	NS		7.33269	7.3461	7.2663	6.92593		acid phosphatase, putative similar to acid phosphatase GI:5360721 from [Lupinus albus]; supported by cDNA: gi_13605749_gb_AF361856.1_AF361856
261524_at	At1g14300	0.0709964	0.312372	0.158523	0.567174	0.0287293	0.521384		NS	NS	NS		4.92329	4.77708	4.80444	4.66964		hypothetical protein predicted by genemark.hmm
261477_at	At1g14310	0.458716	0.581706	0.29463	0.46478	0.14372	0.0800269		NS	NS	NS		5.48247	5.38893	5.59339	5.64794		unknown protein
261490_at	At1g14320	0.0176695	0.263963	0.0303973	0.723538	0.0136594	0.460069		NS	NS	NS		10.7637	10.5251	10.5315	10.5039		tumor suppressor, putative similar to tumor suppressor GI:575354 from [Oryza sativa]; supported by cDNA: gi_14190448_gb_AF378902.1_AF378902
261525_at	At1g14330	0.107407	0.579198	0.273956	0.784951	0.87926	0.839326		NS	NS	NS		5.62965	6.00998	5.87769	5.659		hypothetical protein predicted by genemark.hmm
261487_at	At1g14340	0.518737	0.783553	0.456196	0.984295	0.225338	0.638089		NS	NS	NS		4.95566	5.01063	5.01519	5.07453		hypothetical protein predicted by genemark.hmm;supported by full-length cDNA: Ceres:9495.
261488_at	At1g14345	0.26677	0.916306	0.374248	0.987582	0.159211	0.451216		NS	NS	NS		8.74137	8.52681	8.54768	8.49051		Expressed protein ; supported by full-length cDNA: Ceres: 19170.
261491_at	At1g14350	0.100431	0.204281	0.0100464	0.197675	0.0113293	0.162486		NS	NS	NS		4.8841	4.69316	4.55485	4.58129		hypothetical protein contains similarity to myb-related protein 1 (myb1) GI:4079591 from [Xenopus laevis]; supported by cDNA: gi_15375304_gb_AF371982.2_AF371982
261485_at	At1g14360	0.012137	0.787839	0.165589	0.507415	0.00940224	0.918147		NS	NS	NS		6.10763	5.13319	5.65209	5.14262		unknown protein ;supported by full-length cDNA: Ceres:6937.
261526_at	At1g14370	0.324386	0.44323	0.435323	0.235084	0.272142	0.634192		NS	NS	NS		4.88006	5.05613	5.0129	5.10763		protein kinase identical to protein kinase GI:2852447 from [Arabidopsis thaliana]; supported by cDNA: gi_2852446_dbj_D88206.1_D88206
261479_at	At1g14380	0.0893406	0.452852	0.741623	0.0815074	0.681437	0.999239		NS	NS	NS		5.83245	6.04421	5.80073	5.87283		unknown protein ;supported by full-length cDNA: Ceres:39090.
261527_at	At1g14390	0.0489111	0.266816	0.0286219	0.0121682	0.146843	0.0295865		NS	NS	NS		3.52979	3.68463	3.39443	3.62497		hypothetical protein similar to putative receptor-like protein kinase GI:2947063 from [Arabidopsis thaliana]
261484_at	At1g14400	0.37944	0.537534	0.276823	0.653774	0.185212	0.911613		NS	NS	NS		8.83827	8.88776	8.90092	8.93517		E2, ubiquitin-conjugating enzyme 1 (UBC1) identical to gi:431259, SP:P25865;supported by full-length cDNA: Ceres:18146.
261493_at	At1g14410	0.00138802	0.150186	0.0992495	0.514485	0.126576	0.266309		0.00138802	NS	NS		6.00109	5.38915	5.77911	5.79478		DNA-binding protein p24, putative similar to DNA-binding protein p24 GI:9651810 from [Solanum tuberosum]; supported by cDNA: gi_13877786_gb_AF370156.1_AF370156
261528_at	At1g14420	0.45777	0.208607	0.569323	0.0471764	0.357754	0.988443		NS	NS	NS		3.06656	3.12509	3.03434	3.12895		pectate lyase, putative similar to pectate lyase GI:2463509 from [Zinnia elegans]
261529_at	At1g14430	0.709693	0.442969	0.436889	0.845639	0.129131	0.767876		NS	NS	NS		3.34109	3.36935	3.27736	3.47484		hypothetical protein contains similarity to glyoxal oxidase GI:399594 from [Phanerochaete chrysosporium]
261502_at	At1g14440	0.0278731	0.595564	0.0845136	0.0374714	0.020945	0.0910843		NS	NS	NS		3.6029	3.93189	3.76999	3.829		hypothetical protein predicted by genemark.hmm
261489_at	At1g14450	0.693619	0.208124	0.347775	0.791503	0.246946	0.0935158		NS	NS	NS		7.54719	7.52885	7.61629	7.65628		hypothetical protein contains similarity to cytochrome c oxidase subunit I GI:5678701 from [Loligo pealei]; supported by full-length cDNA: Ceres: 314.
261471_at	At1g14460	0.521071	0.998027	0.622091	0.886986	0.0200686	0.346952		NS	NS	NS		4.31411	4.22096	4.35888	4.08797		hypothetical protein contains similarity to DNA polymerase III gamma and tau subunits
261472_at	At1g14470	0.857653	0.449263	0.315169	0.364366	0.57546	0.371665		NS	NS	NS		3.24997	3.23787	3.17522	3.29714		hypothetical protein predicted by genemark.hmm
261476_at	At1g14480	0.175341	0.665774	0.0739126	0.2263	0.397288	0.260553		NS	NS	NS		3.60514	3.49418	3.44908	3.52632		hypothetical protein contains similarity to alpha-latroinsectotoxin precursor GI:9537 from [Latrodectus tredecimguttatus]
261473_at	At1g14490	0.727715	0.749775	0.305636	0.773601	0.172398	0.414266		NS	NS	NS		3.96402	3.99758	4.04386	3.86083		hypothetical protein similar to putative DNA binding protein GI:2827558 from [Arabidopsis thaliana]
261486_at	At1g14510	0.190915	0.84477	0.360897	0.382324	0.312365	0.154984		NS	NS	NS		6.87886	6.78289	6.78564	6.79174		nucleic acid binding protein (alfin-1), putative similar to nucleic acid binding protein (alfin-1) GI:166409 from [Medicago sativa];supported by full-length cDNA: Ceres:41104.
261478_at	At1g14520	0.206135	0.352379	0.518108	0.796749	0.530598	0.980133		NS	NS	NS		3.3779	3.53894	3.44135	3.31347		unknown protein
261482_at	At1g14530	0.17215	0.880649	0.0656165	0.838842	0.0759513	0.0236106		NS	NS	NS		4.55231	4.36845	4.36997	4.39223		unknown protein ;supported by full-length cDNA: Ceres:12043.
261474_at	At1g14540	0.273417	0.599534	0.181395	0.824512	0.486706	0.861998		NS	NS	NS		3.18884	3.28125	3.07297	3.14039		anionic peroxidase, putative similar to anionic peroxidase GI:170202 from [Nicotiana sylvestris]
261475_at	At1g14550	0.999064	0.999874	0.858894	0.655865	0.62686	0.922842		NS	NS	NS		3.34453	3.34443	3.35673	3.38074		anionic peroxidase, putative similar to anionic peroxidase GI:170202 from [Nicotiana sylvestris]
260777_at	At1g14560	0.135557	0.319225	0.523325	0.375479	0.527618	0.0236763		NS	NS	NS		5.27629	5.45746	5.20884	5.21661		mitochondrial carrier protein, putative similar to MITOCHONDRIAL SOLUTE CARRIER PROTEIN HOMOLOG GB:P16260 from [Homo sapiens]
260782_at	At1g14570	0.122176	0.181069	0.572021	0.99885	0.119078	0.368546		NS	NS	NS		7.18215	7.31228	7.22312	7.29322		unknown protein ; supported by cDNA: gi_13877612_gb_AF370507.1_AF370507
260776_at	At1g14580	0.884204	0.211299	0.51179	0.970652	0.996096	0.415118		NS	NS	NS		5.36273	5.34308	5.45042	5.36323		zinc finger protein, putative similar to zinc finger protein ID1 GB:AAC18941 GI:3170601 from [Zea mays]
260780_at	At1g14610	0.662342	0.0259845	0.95486	0.697192	0.874024	0.750398		NS	NS	NS		7.03331	7.05626	7.03673	7.04328		valyl-tRNA synthetase, putative similar to valyl tRNA synthetase GB:AAB49704 GI:1890130 from [Arabidopsis thaliana]; supported by cDNA: gi_1890129_gb_U89986.1_ATU89986
260781_at	At1g14620	0.0321595	0.551857	0.0567842	0.11102	0.0338896	0.477318		NS	NS	NS		5.25433	4.85475	4.95729	4.78959		decoy identical to GB:AAB51588 GI:1931612 from [Arabidopsis thaliana]; supported by cDNA: gi_1842110_gb_U87586.1_ATU87586
260778_at	At1g14640	0.973858	0.715411	0.165678	0.768288	0.940338	0.179507		NS	NS	NS		3.99286	3.99018	4.11716	3.99782		splicing factor, putative similar to human splicing factor GB:CAA59494 GI:899298 from [Homo sapiens]
260779_at	At1g14650	0.556794	0.89645	0.774054	0.591834	0.529337	0.0746462		NS	NS	NS		4.45544	4.54783	4.50095	4.49797		splicing factor, putative similar to human splicing factor GB:CAA59494 GI:899298 from [Homo sapiens]
262835_at	At1g14660	0.829264	0.858334	0.728426	0.264643	0.113951	0.732858		NS	NS	NS		3.65435	3.63295	3.6934	3.82144		Na+ H+ antiporter, putative similar to Na+ H+ antiporter GB:CAA69925 GI:1655702 from (Xenopus laevis)
262846_at	At1g14670	0.00278082	0.309644	0.0417068	0.354638	0.00373939	0.823338		NS	NS	NS		8.37913	7.83125	8.19152	8.03253		endomembrane protein, putative similar to endomembrane protein emp70 precursor isolog GB:AAF67014 GI:7677068 [Homo sapiens]; supported by cDNA: gi_15450754_gb_AY053419.1_
262836_at	At1g14680	0.438108	0.0302199	0.0176547	0.001269	0.665231	0.580686		NS	NS	NS		3.17085	3.20308	3.28817	3.2141		hypothetical protein predicted by genemark.hmm
262848_at	At1g14685	0.459389	0.598686	0.295689	0.910243	0.23482	0.811781		NS	NS	NS		6.57192	6.70427	6.75471	6.78348		unknown protein ; supported by cDNA: gi_16604349_gb_AY058073.1_
262843_at	At1g14687	0.889309	0.628497	0.0892094	0.503551	0.494318	0.745053		NS	NS	NS		3.43933	3.45123	3.26165	3.37811		Expressed protein ; supported by full-length cDNA: Ceres: 25577.
262834_at	At1g14690	0.056996	0.212298	0.530322	0.328303	0.341363	0.619408		NS	NS	NS		4.30594	4.40143	4.34123	4.38031		hypothetical protein predicted by genscan+; shares partial similarity to myosin heavy chain SP: P14105 [Gallus gallus (Chicken)]
262830_at	At1g14700	0.391478	0.586197	0.870572	0.840666	0.642862	0.617741		NS	NS	NS		5.73478	5.53967	5.69472	5.62569		purple acid phosphatase, putative contains Pfam profile: PF02227 Purple acid phosphatase
262849_at	At1g14710	0.00206231	0.0882409	0.00179792	0.837005	0.0364094	0.613101		0.00206231	NS	NS		6.65072	6.32285	6.19177	6.27564		unknown protein ; supported by cDNA: gi_16612297_gb_AF439842.1_AF439842
262842_at	At1g14720	0.246161	0.984692	0.979098	0.804199	0.177231	0.205084		NS	NS	NS		7.19748	7.31231	7.19983	7.0669		xyloglucan endo-transglycosylase, putative similar to xyloglucan endo-transglycosylase GB:CAA63553 GI:1769907 [Arabidopsis thaliana], identical to endoxyloglucan transferase related protein GB:BAA20290, GI:2154611 [Arabidopsis thaliana];supported by full-length cDNA: Ceres:19079.
262831_at	At1g14730	0.96879	0.781703	0.277544	0.265798	0.418615	0.0895937		NS	NS	NS		3.54678	3.54435	3.63952	3.60165		cytochrome B561, putative similar to cytochrome GB:AAD11424 GI:4206110 [Mesembryanthemum crystallinum]
262845_at	At1g14740	0.0170095	0.520367	0.000928794	0.582403	0.00511309	0.0569254		NS	0.000928794	NS		4.57491	4.93251	4.89988	4.80462		unknown protein ; supported by cDNA: gi_14596044_gb_AY042810.1_
262833_at	At1g14750	0.523845	0.450187	0.442229	0.977842	0.754083	0.169756		NS	NS	NS		3.29525	3.35526	3.22946	3.26883		cyclin, putative contains Pfam profile: PF00134 Cyclin
262886_at	At1g14760	0.547981	0.104835	0.504262	0.76941	0.919296	0.644979		NS	NS	NS		4.34164	4.40215	4.28044	4.34942		hypothetical protein
262839_at	At1g14770	0.00613787	0.0642683	0.00347965	0.944369	0.110082	0.967977		NS	NS	NS		3.9998	3.79962	3.76836	3.89878		PhD-finger protein, putative contains Pfam profile:PF00628 PHD-finger;supported by full-length cDNA: Ceres:41103.
262887_at	At1g14780	0.799313	0.997459	0.236856	0.88514	0.801332	0.705195		NS	NS	NS		3.70257	3.65538	3.47585	3.65422		hypothetical protein
262888_at	At1g14790	0.000324733	0.933844	0.760472	0.0307357	0.77732	0.208344		0.000324733	NS	NS		5.06275	4.63514	5.04109	5.03427		RNA-directed RNA polymerase, putative similar to RNA-directed RNA polymerase GB:CAA09697 GI:4138282 [Nicotiana tabacum]
262889_at	At1g14800	0.150692	0.253367	0.299765	0.210888	0.956082	0.145942		NS	NS	NS		3.41497	3.55197	3.30719	3.40972		hypothetical protein
262841_at	At1g14810	0.438705	0.743975	0.311201	0.907393	0.99101	0.316431		NS	NS	NS		8.35687	8.48695	8.50658	8.35748		aspartate-semialdehyde dehydrogenase, putative similar to aspartate-semialdehyde dehydrogenase SP:O31219 [Legionella pneumophila];supported by full-length cDNA: Ceres:109497.
257463_at	At1g14820	0.000427384	0.98153	0.00393593	0.00668163	0.00564587	0.233212		0.000427384	NS	NS		6.92604	6.63102	6.75382	6.73031		phosphatidylinositol/phosphatidylcholine transfer protein, putative similar to phosphatidylinositol/phosphatidylcholine transfer protein SP:P24280 [Saccharomyces cerevisiae (Baker s yeast)]
262837_at	At1g14830	0.0238677	0.936927	0.234904	0.983353	0.042904	0.742462		NS	NS	NS		7.09963	6.83244	6.92085	6.814		dynamin, putative similar to dynamin-1 SP:P21575 [Rattus norvegicus (Rat)];supported by full-length cDNA: Ceres:12880.
262847_at	At1g14840	0.248333	0.500159	0.396254	0.0674777	0.191065	0.0539753		NS	NS	NS		5.52059	5.4116	5.46132	5.44232		unknown protein similar to myosin heavy chain GB:D50475 GI:806512 [Cyprinus carpio]; supported by cDNA: gi_15983419_gb_AF424584.1_AF424584
262890_at	At1g14850	0.305074	0.83674	0.494844	0.293865	0.835867	0.997331		NS	NS	NS		4.40134	4.31846	4.3364	4.41889		nucleoporin, putative similar to nuclear pore complex protein (NUP155) SP:O75694 [Homo sapiens (Human)]
262832_s_at	At1g14870	0.0082971	0.284295	0.851432	0.565896	0.377006	0.744947		NS	NS	NS		9.82179	8.80374	9.75297	9.51176		unknown protein
262844_at	At1g14890	0.00390238	0.971847	0.0372956	0.206178	0.0222981	0.239877		NS	NS	NS		4.42471	5.02491	4.77528	4.88971		unknown protein similar to pectinesterase GB:X85216 GI:732912 [Phaseolus vulgaris];supported by full-length cDNA: Ceres:33355.
262840_at	At1g14900	0.592309	0.347293	0.358645	0.683796	0.654211	0.886996		NS	NS	NS		4.21974	4.14618	4.07153	4.16432		linker histone protein, putative contains Pfam profile:PF00538 linker histone H1 and H5 family;supported by full-length cDNA: Ceres:10525.
262856_at	At1g14910	0.342704	0.963112	0.0594007	0.656145	0.479449	0.754395		NS	NS	NS		6.39925	6.51459	6.60011	6.48204		unknown protein contains Pfam profile: PF01417 ENTH domain
262850_at	At1g14920	0.487345	0.84512	0.213587	0.844892	0.456494	0.845689		NS	NS	NS		7.03249	7.12336	7.20525	6.93566		signal response protein (GAI) identical to GAI GB:CAA75492 GI:2569938 [Arabidopsis thaliana] (Genes Dev. In press); supported by cDNA: gi_16648833_gb_AY058194.1_
262857_at	At1g14930	0.128731	0.22534	0.0570301	0.652181	0.862088	0.317521		NS	NS	NS		3.17463	3.06233	3.02059	3.16237		major latex homologue type2 identical to major latex homologue type2 GB:CAA63007 GI:1592683 [Arabidopsis thaliana]
262858_at	At1g14940	0.860848	0.726294	0.666973	0.666232	0.835288	0.285926		NS	NS	NS		3.4043	3.42965	3.34731	3.43236		major latex protein type3 identical to major latex protein type3 GB:CAA63027 GI:1107495 [Arabidopsis thaliana]
262828_at	At1g14950	0.817495	0.0423225	0.657203	0.297563	0.686732	0.316946		NS	NS	NS		4.31569	4.29841	4.34819	4.35114		major latex protein type1 identical to major latex protein type1 GB:CAA63026 GI:1107493 [Arabidopsis thaliana]
262838_at	At1g14960	0.561284	0.235294	0.972224	0.0532015	0.982663	0.955913		NS	NS	NS		3.49518	3.43334	3.49841	3.49265		major latex protein, putative similar to major latex-like protein GB:CAA11844 GI:3164115 [Rubus idaeus];supported by full-length cDNA: Ceres:3858.
262829_at	At1g14970	0.158633	0.0909265	0.0648704	0.970531	0.356845	0.781653		NS	NS	NS		3.80549	3.66279	3.62075	3.72443		auxin-independent growth promoter, putative similar to axi1 GB:X80301 GI:559920 [Nicotiana tabacum]
260714_at	At1g14980	0.000540572	0.816257	0.00427599	0.614282	0.000343459	0.501773		0.000540572	NS	0.000343459		8.51979	7.73965	7.89086	7.77681		chaperonin CPN10 identical to SP:P34893 from [Arabidopsis thaliana];supported by full-length cDNA: Ceres:26943.
260738_at	At1g14990	0.0639529	0.873997	0.155219	0.0662552	0.0953659	0.847232		NS	NS	NS		4.95327	4.73216	4.81685	4.79063		hypothetical protein predicted by genemark.hmm
260739_at	At1g15000	0.414983	0.610094	0.115377	0.61956	0.792315	0.367782		NS	NS	NS		5.3518	5.19921	5.06835	5.31176		serine carboxypeptidase precursor, putative similar to GB:AAD42963 from [Matricaria chamomilla]
260744_at	At1g15010	0.469058	0.940603	0.47073	0.988774	0.445663	0.942907		NS	NS	NS		3.99757	3.3346	3.33302	3.29804		hypothetical protein predicted by genemark.hmm;supported by full-length cDNA: Ceres:24933.
260740_at	At1g15020	0.659386	0.27575	0.0901135	0.959183	0.571993	0.344696		NS	NS	NS		4.42137	4.49551	4.61975	4.47852		thioredoxin, putative contains Pfam profile: PF00085 Thioredoxin
260743_at	At1g15040	0.817339	0.751328	0.132869	0.0928024	0.0440153	0.394734		NS	NS	NS		3.05968	3.0736	3.17583	3.20821		unknown protein
260741_at	At1g15045	0.303119	0.557711	0.624617	0.352803	0.157217	0.473728		NS	NS	NS		3.69354	3.62918	3.73114	3.8061		hypothetical protein contains Pfam profile: PF00117 Glutamine amidotransferase class-I
260742_at	At1g15050	0.75853	0.457698	0.682613	0.931465	0.832313	0.677659		NS	NS	NS		3.40284	3.43407	3.42595	3.41462		putative glycerol kinase identical to SP:P34893 from [Arabidopsis thaliana] (J. Mol. Biol. 251 (4), 533-549 (1995))
262604_at	At1g15060	0.407316	0.929779	0.245639	0.111456	0.233811	0.857388		NS	NS	NS		5.5044	5.64092	5.6245	5.65309		unknown protein similar to unknown protein GB:CAA03956 from [Hordeum vulgare], EST gb|F14271 comes from this gene
262596_at	At1g15080	0.719048	0.463503	0.0217122	0.433202	0.173077	0.268136		NS	NS	NS		4.82871	4.79423	4.54866	4.65392		putative phosphatidic acid phosphatase Contains similarity to gb|AF014403 type-2 phosphatidic acid phosphatase alpha-2 (PAP2_a2) from Homo sapiens. ESTs gb|T88254 and gb|AA394650 come from this gene;supported by full-length cDNA: Ceres:37546.
262590_at	At1g15100	5.98044e-05	0.326789	5.54714e-05	0.493698	0.00196567	0.284296		5.98044e-05	5.54714e-05	0.00196567		5.2872	4.44209	4.40614	4.76249		putative RING-H2 zinc finger protein ESTs gb|N37587, gb|T04684, gb|AA394318, gb|Z35014 and gb|AA713343 come from this gene;supported by full-length cDNA: Ceres:5398.
262583_at	At1g15110	0.491491	0.513697	0.468513	0.320655	0.87479	0.872798		NS	NS	NS		4.44738	4.37548	4.37487	4.42913		putative phosphatidylserine synthase Similar to gb|AF099053 phosphatidylserine synthase-2 from Mus musculus. EST gb|N96271 comes from this gene
262593_at	At1g15120	0.0951421	0.43292	0.548485	0.606805	0.517413	0.266426		NS	NS	NS		8.35125	8.17968	8.39898	8.28649		putative ubiquinol--cytochrome-c reductase Similar to gb|X79273 cytochrome c reductase hinge protein subunit from Solanum tuberosum. ESTs gb|T45282 and gb|T21596 come from this gene;supported by full-length cDNA: Ceres:19178.
262588_at	At1g15130	0.157432	0.387302	0.233563	0.572334	0.427467	0.29222		NS	NS	NS		6.94591	7.08167	7.05989	7.02754		unknown protein Similar to gb|AJ005073 Alix (ALG-2-interacting protein X) from Mus musculus. ESTs gb|R90133, gb|Z17944 and gb|AA605465 come from this gene
262572_at	At1g15140	0.110844	0.577839	0.406799	0.608839	0.244372	0.694667		NS	NS	NS		8.55964	8.36921	8.45494	8.41197		unknown protein Contains a PF|00175 Oxidoreductase FAD/NADH-binding domain. ESTs gb|H76345 and gb|AA651465 come from this gene; supported by cDNA: gi_15451091_gb_AY054626.1_
262589_s_at	At1g15150	0.581329	0.71069	0.156671	0.605167	0.929569	0.487796		NS	NS	NS		3.77348	3.84548	4.09298	3.78365		hypothetical protein Strong similarity to gi|4734005 F3L12.7 hypothetical protein from Arabidopsis thaliana BAC gb|AC007178
262605_at	At1g15170	0.0514182	0.0826127	0.819578	0.00155795	0.877189	0.241158		NS	NS	NS		4.67043	4.47543	4.65635	4.65885		hypothetical protein Strong similarity to gi|4734005 F3L12.7 hypothetical protein from Arabidopsis thaliana BAC gb|AC007178
262569_at	At1g15180	0.986135	0.827527	0.999773	0.991802	0.741303	0.462002		NS	NS	NS		5.03214	5.02819	5.03208	4.97052		hypothetical protein Strong similarity to gi|4734005 F3L12.7 hypothetical protein from Arabidopsis thaliana BAC gb|AC007178; supported by cDNA: gi_15028308_gb_AY045957.1_
262606_at	At1g15190	0.383968	0.520562	0.582795	0.773452	0.960373	0.623523		NS	NS	NS		3.6444	3.7509	3.58139	3.63876		hypothetical protein predicted by genscan+
262570_at	At1g15200	0.0953292	0.809332	0.496564	0.0273027	0.368253	0.152755		NS	NS	NS		5.59305	5.73423	5.55399	5.54699		unknown protein EST gb|H77143 comes from this gene; supported by cDNA: gi_15293206_gb_AY051037.1_
262575_at	At1g15210	0.709283	0.644489	0.714004	0.145128	0.813524	0.905181		NS	NS	NS		3.55714	3.52938	3.58655	3.53187		putative ABC transporter Similar to gb|Z70524 PDR5-like ABC transporter from Spirodela polyrrhiza and is a member of the PF|00005 ABC transporter family. ESTs gb|N97039 and gb|T43169 come from this gene
262591_at	At1g15220	0.962241	0.911449	0.89036	0.0179137	0.842871	0.0629221		NS	NS	NS		4.3579	4.35404	4.34972	4.34524		hypothetical protein Similar to gb|X82560 cytochrome C-type biogenesis protein (cycL) from Rhizobium meliloti;supported by full-length cDNA: Ceres:154344.
262574_at	At1g15230	0.0606905	0.421601	0.114319	0.823562	0.00203078	0.689507		NS	NS	0.00203078		4.79415	4.97313	4.98383	5.16012		unknown protein ESTs gb|R30529, gb|Z48463, gb|Z48467, gb|AA597369 and gb|AA394772 come from this gene; supported by cDNA: gi_16209679_gb_AY057603.1_
262594_at	At1g15250	0.00358303	0.291669	0.000399409	0.541952	0.00047222	0.0275162		NS	0.000399409	0.00047222		5.24567	4.786	4.73555	4.74715		putative 60s ribosomal protein L37 almost identical to GB:Q43292;supported by full-length cDNA: Ceres:11912.
262598_at	At1g15260	0.0966661	0.668869	0.0268054	0.898223	0.098046	0.688843		NS	NS	NS		8.35619	8.09757	7.93049	8.12334		unknown protein EST gb|N65467 comes from this gene;supported by full-length cDNA: Ceres:30239.
262602_at	At1g15270	0.348558	0.792593	0.00973752	0.27968	0.0316133	0.0202987		NS	NS	NS		6.74442	6.80873	6.94337	6.88169		unknown protein ESTs gb|AA650895, gb|AA720043 and gb|R29777 come from this gene; supported by full-length cDNA: Ceres: 22166.
262576_at	At1g15280	0.578631	0.77802	0.863375	0.871251	0.469515	0.853268		NS	NS	NS		5.52479	5.4752	5.53965	5.6025		unknown protein ESTs gb|R90323, gb|R90338. gb|Z25504 and gb|AA651448 come from this gene
262577_at	At1g15290	0.123383	0.194632	0.501675	0.647304	0.147924	0.319472		NS	NS	NS		5.76066	5.91593	5.82834	5.90393		unknown protein ESTs gb|F20110 and gb|F20109 come from this gene
262578_at	At1g15300	0.631893	0.0927833	0.116056	0.0169965	0.574263	0.415831		NS	NS	NS		3.2653	3.30481	3.14866	3.33372		hypothetical protein Similar to gi|22113 Ac transposase (ORFa) from Zea mays transcript gb|X05424
262601_at	At1g15310	0.333584	0.887885	0.314934	0.310663	0.792468	0.826002		NS	NS	NS		4.41617	4.30422	4.53495	4.38574		hypothetical protein similar to GB:P49967 signal recognition particle 54 kDa subunit (Srp54-1) from [Arabidopsis thaliana].;supported by full-length cDNA: Ceres:22158.
262579_at	At1g15320	0.564348	0.663304	0.381167	0.208136	0.925472	0.715938		NS	NS	NS		3.18168	3.14189	3.11527	3.17517		hypothetical protein predicted by genscan
262580_at	At1g15330	0.401663	0.248253	0.790091	0.769598	0.199764	0.98108		NS	NS	NS		3.64872	3.55635	3.67767	3.50292		hypothetical protein Similar to gb|U40713 Pv42p gene from Phaseolus vulgaris and contains PF|00571 CBS (cystathionine beta synthase) domain
262600_at	At1g15340	0.00287114	0.216949	0.163914	0.139916	0.0109468	0.774882		NS	NS	NS		6.71157	6.92693	6.80588	6.90781		unknown protein ESTs gb|H37032, gb|R6425, gb|Z34651, gb|N37268, gb|AA713172 and gb|Z34241 come from this gene;supported by full-length cDNA: Ceres:16209.
262599_at	At1g15350	0.108181	0.304424	0.228529	0.934735	0.149055	0.670712		NS	NS	NS		5.66398	5.89352	5.83289	5.89307		unknown protein ESTs gb|R65145, gb|N96612 and gb|R90096 come from this gene;supported by full-length cDNA: Ceres:9177.
262595_at	At1g15360	0.536453	0.48364	0.811099	0.945405	0.291238	0.645956		NS	NS	NS		3.75517	3.66276	3.78708	3.91742		putative ethylene responsive element Similar to gb|AB008104 ethylene responsive element binding factor 2 from Arabidopsis thaliana and contains an PF|00847 AP2 domain. EST gb|AA728476 comes from this gene;supported by full-length cDNA: Ceres:17356.
262581_at	At1g15370	0.0820167	0.337632	0.283	0.476851	0.482173	0.735916		NS	NS	NS		7.41466	7.25032	7.33256	7.35084		unknown protein ESTs gb|T22508, gb|H36196 and gb|AI100134 come from this gene
262603_at	At1g15380	0.992267	0.456543	0.368537	0.20187	0.954567	0.359958		NS	NS	NS		3.6445	3.64335	3.75961	3.65079		hypothetical protein Is a member of the PF|00903 gyloxalase family. ESTs gb|T44721, gb|T21844 and gb|AA395404 come from this gene; supported by full-length cDNA: Ceres: 5364.
262573_at	At1g15390	0.7909	0.909072	0.640119	0.592405	0.990552	0.806388		NS	NS	NS		6.1569	6.12075	6.07583	6.15494		hypothetical protein Similar to gi|4377403 Polypeptide Deformylase from Chlamydia pneumoniae genome gb|AE001687; supported by cDNA: gi_11320951_gb_AF250959.1_AF250959
262592_at	At1g15400	0.00344343	0.104977	4.5754e-05	0.924849	0.00278297	0.125867		NS	4.5754e-05	NS		7.11033	7.3048	7.51275	7.38713		unknown protein ESTs gb|H37295 and gb|R64895 come from this gene;supported by full-length cDNA: Ceres:13543.
262582_at	At1g15410	0.142843	0.4793	0.169488	0.0322072	0.576739	0.232174		NS	NS	NS		5.64078	5.51996	5.52059	5.5589		hypothetical protein Is a member of the PF|01177 Aspartate-glutamate racemase family. EST gb|T43554 comes from this gene
262544_at	At1g15425	0.0458896	0.222347	0.261436	0.267609	0.0159854	0.148278		NS	NS	NS		4.99381	4.75009	4.87621	4.68337		hypothetical protein predicted by genscan+
262571_at	At1g15430	0.178482	0.818741	0.0555274	0.515042	0.377384	0.193911		NS	NS	NS		4.7544	4.95254	4.92267	4.83921		hypothetical protein predicted by genscan+; supported by cDNA: gi_15293248_gb_AY051058.1_
262584_at	At1g15440	0.0754358	0.769195	0.0512525	0.902193	0.05968	0.644201		NS	NS	NS		5.36752	5.09839	5.09484	5.0372		hypothetical protein Strong similarity to gb|X95263 Periodic tryptophan protein 2 gene (PWP2) from Homo sapiens and contains 6 WD40, G-beta repeat domains
262585_at	At1g15460	0.878594	0.429267	0.69406	0.294666	0.108695	0.761869		NS	NS	NS		3.54336	3.5573	3.57532	3.68961		hypothetical protein Is a member of the PF|00955 Anion exchanger family
262597_at	At1g15470	0.129303	0.373511	0.0236862	0.270794	0.28825	0.441694		NS	NS	NS		6.77045	6.61325	6.44118	6.65929		unknown protein Strong similarity to gb|AF096285 serine-threonine kinase receptor-associated protein from Mus musculus and contains 5 PF|00400 WD40, G-beta repeat domains. EST gb|F14050 comes from this gene;supported by full-length cDNA: Ceres:113014.
262586_at	At1g15480	0.0661788	0.519875	0.69069	0.558127	0.71154	0.76306		NS	NS	NS		3.92049	3.73595	3.87903	3.88042		hypothetical protein predicted by genscan+
262587_at	At1g15490	0.0118275	0.0710161	0.483253	0.0379991	0.0187715	0.97973		NS	NS	NS		4.64329	4.34814	4.55795	4.3513		unknown protein Contains PF|00561 alpha/beta hydrolase fold
261767_s_at	At1g15500	0.00757003	0.237746	0.055035	0.30416	0.0623593	0.935966		NS	NS	NS		7.36055	7.81009	7.65889	7.6425		adenine nucleotide translocase, putative similar to adenine nucleotide translocase GI:6469340 from [Arabidopsis thaliana];supported by full-length cDNA: Ceres:105967.
261762_at	At1g15510	0.0290023	0.881821	0.329416	0.594965	0.603825	0.286825		NS	NS	NS		4.2378	3.88966	4.11006	4.15017		hypothetical protein predicted by genemark.hmm
261763_at	At1g15520	0.796242	0.40526	0.938472	0.181203	0.760774	0.0760954		NS	NS	NS		4.11055	4.13884	4.10389	4.13556		ABC transporter, putative similar to ABC transporter GI:9279716 from [Arabidopsis thaliana]
261764_at	At1g15530	0.617416	0.746152	0.836842	0.713066	0.292192	0.0265125		NS	NS	NS		3.7328	3.78587	3.75516	3.85274		receptor lectin kinase, putative similar to receptor lectin kinase 3 GI:4100060 from [Arabidopsis thaliana]
261768_at	At1g15550	0.00334269	0.955065	0.0135216	0.734271	0.018758	0.0592078		NS	NS	NS		4.91413	5.46759	5.33768	5.29374		gibberellin 3 beta-hydroxylase, putative similar to gibberellin 3 beta-hydroxylase GI:3982753 from [Arabidopsis thaliana]; supported by cDNA: gi_1945343_gb_L37126.1_ATHGA4A
261765_at	At1g15570	0.407116	0.561754	0.430202	0.990329	0.405997	0.0899637		NS	NS	NS		3.50745	3.57265	3.45388	3.44399		cyclin, putative similar to cyclin GI:562187 from [Brassica napus]
261766_at	At1g15580	0.996573	0.058201	0.67311	0.553857	0.300713	0.596444		NS	NS	NS		4.16021	4.16068	4.11294	4.3186		auxin-induced protein IAA5, putative similar to auxin-induced protein IAA5 GI:972913 from [Arabidopsis thaliana]
261759_at	At1g15590	0.290256	0.19582	0.739956	0.337427	0.535356	0.555164		NS	NS	NS		3.21111	3.13693	3.18106	3.16748		hypothetical protein similar to putative RING zinc finger protein GI:6751714 from [Arabidopsis thaliana]
261760_at	At1g15600	0.212194	0.323795	0.551187	0.082582	0.83146	0.402286		NS	NS	NS		4.01871	3.89986	3.96459	4.04732		hypothetical protein similar to putative RING zinc finger protein GI:6751714 from [Arabidopsis thaliana]
257480_at	At1g15640	0.336119	0.169043	0.0388333	0.890262	0.88562	0.369659		NS	NS	NS		3.58412	3.49942	3.38389	3.59612		hypothetical protein similar to putative RING zinc finger protein GI:6751714 from [Arabidopsis thaliana]
261761_at	At1g15660	0.413652	0.49736	0.45095	0.235986	0.475147	0.745114		NS	NS	NS		4.76195	4.68643	4.84165	4.88487		hypothetical protein predicted by genemark.hmm
259502_at	At1g15670	0.878244	0.482814	0.466735	0.77291	0.195938	0.85276		NS	NS	NS		5.20656	5.24433	5.36314	4.96044		unknown protein ; supported by cDNA: gi_15146331_gb_AY049307.1_
259504_at	At1g15690	0.000625705	0.258097	0.00260283	0.645385	0.00113782	0.495243		0.000625705	NS	0.00113782		11.4132	11.1167	11.1126	11.1149		inorganic pyrophosphatase, putative similar to inorganic pyrophosphatase GI:790478 from [Nicotiana tabacum]; supported by cDNA: gi_166633_gb_M81892.1_ATHAVP3
259485_at	At1g15700	0.996061	0.663625	0.296652	0.201333	0.182178	0.380225		NS	NS	NS		4.03057	4.03004	3.89291	3.88496		ATP synthase gamma-subunit, putative similar to ATP synthase gamma-subunit GI:21241 from [Spinacia oleracea]
259486_at	At1g15710	0.845184	0.398923	0.728894	0.88453	0.698178	0.195584		NS	NS	NS		5.86712	5.83934	5.91247	5.81695		embryo abundance protein (EMB20), putative similar to embryo abundance protein (EMB20) GI:1350503 from [Picea glauca]
259487_at	At1g15720	0.269177	0.13294	0.0475836	0.771549	0.864972	0.831434		NS	NS	NS		4.1532	4.0483	3.95955	4.17372		hypothetical protein contains similarity to telomere binding protein-1 GI:9716453 from [Oryza sativa]
259499_at	At1g15730	0.000299131	0.536458	0.00752436	0.488655	0.0323358	0.444694		0.000299131	NS	NS		7.28957	7.65971	7.65586	7.50968		PRLI-interacting factor L, putative similar to PRLI-interacting factor L GI:11139268 from [Arabidopsis thaliana]; supported by cDNA: gi_14194110_gb_AF367261.1_AF367261
259500_at	At1g15740	0.000291912	0.657779	4.33596e-05	0.80575	8.17277e-05	0.704107		0.000291912	4.33596e-05	8.17277e-05		7.0475	7.82609	7.81588	7.95281		unknown protein ; supported by cDNA: gi_14423507_gb_AF386991.1_AF386991
259501_at	At1g15750	0.0147586	0.306597	0.0652591	0.181879	0.00189499	0.394176		NS	NS	0.00189499		7.19916	6.87303	6.96052	6.7074		unknown protein ; supported by cDNA: gi_15028126_gb_AY046013.1_
259488_at	At1g15780	0.0450644	0.211556	0.0264014	0.213433	0.0152036	0.911888		NS	NS	NS		5.897	6.10107	6.13469	6.10845		hypothetical protein preedicted by genemark.hmm
259489_at	At1g15790	0.434902	0.846122	0.0726365	0.246569	0.295919	0.900072		NS	NS	NS		3.4331	3.3114	3.74966	3.5932		unknown protein
259490_at	At1g15800	0.857092	0.538678	0.787043	0.342498	0.269579	0.451599		NS	NS	NS		4.33921	4.35797	4.31389	4.44842		hypothetical protein preedicted by genemark.hmm
259505_at	At1g15810	0.265501	0.275901	0.0552114	0.237124	0.0102411	0.112023		NS	NS	NS		5.80936	5.66632	5.51827	5.4216		hypothetical protein contains similarity to ribosomal protein S15; supported by cDNA: gi_13605576_gb_AF361614.1_AF361614
259491_at	At1g15820	0.000647681	0.591231	0.000950753	0.729229	0.000328135	0.884244		0.000647681	0.000950753	0.000328135		12.1805	12.4738	12.4172	12.4757		chlorophyll binding protein, putative similar to chlorophyll binding protein GI:169213 from [Petunia hybrida]
259492_at	At1g15830	0.561062	0.286005	0.211201	0.545249	0.416816	0.254585		NS	NS	NS		4.7017	4.78865	4.51676	4.81739		hypothetical protein predicted by genemark.hmm
259493_at	At1g15840	0.65348	0.848174	0.089744	0.995489	0.637832	0.283274		NS	NS	NS		5.27403	5.20863	5.01125	5.34428		unknown protein
259494_at	At1g15850	0.454244	0.628929	0.290269	0.0593304	0.149465	0.928417		NS	NS	NS		3.2187	3.29597	3.31983	3.35917		mitotic checkpoint protein, putative similar to mitotic checkpoint protein GI:9294423 from [Arabidopsis thaliana]
259497_at	At1g15860	0.0481686	0.855411	0.0179856	0.0196981	0.0525347	0.45835		NS	NS	NS		5.65985	5.41447	5.33944	5.36033		unknown protein
259503_at	At1g15870	0.274734	0.214963	0.740134	0.948865	0.263291	0.445398		NS	NS	NS		3.68712	3.59543	3.71972	3.60749		unknown protein ; supported by cDNA: gi_15215659_gb_AY050358.1_
259498_at	At1g15880	0.150115	0.791123	0.111942	0.603577	0.305186	0.880941		NS	NS	NS		6.81199	7.10243	7.14665	7.02216		unknown protein similar to putative cis-Golgi SNARE protein GI:2583133 from [Arabidopsis thaliana]; supported by cDNA: gi_12083259_gb_AF332426.1_AF332426
259495_at	At1g15890	0.00847181	0.442218	0.00195338	0.765375	0.0265587	0.0328917		NS	NS	NS		3.71368	4.08971	4.19383	4.03115		NBS/LRR disease resistance protein, putative similar to NBS/LRR disease resistance protein GI:3309619 from [Arabidopsis thaliana]
259496_at	At1g15900	0.794428	0.0385001	0.685593	0.0518789	0.0413697	0.732591		NS	NS	NS		3.63725	3.66267	3.67584	3.80318		hypothetical protein predicted by genscan+
261837_s_at	At1g15910	0.366118	0.784253	0.272469	0.816746	0.227147	0.988018		NS	NS	NS		3.9073	4.02086	3.98781	3.98004		transcriptional regulator, putative similar to transcriptional regulator GI:4836767 from [Zea mays]
261841_at	At1g15920	0.440283	0.838679	0.573133	0.971451	0.134061	0.166947		NS	NS	NS		5.7654	5.86728	5.83275	5.91296		BTG1 binding factor 1, putative similar to BTG1 binding factor 1 GI:6016012 from [Homo sapiens]
261789_at	At1g15930	0.585937	0.558273	0.146761	0.848624	0.181413	0.202039		NS	NS	NS		9.39179	9.43804	9.26481	9.28063		40S ribosomal protein S12, putative similar to 40S ribosomal protein S12 GI:4263712 from [Arabidopsis thaliana];supported by full-length cDNA: Ceres:11328.
261844_at	At1g15940	0.850633	0.733258	0.263242	0.30041	0.879921	0.569895		NS	NS	NS		4.5762	4.60032	4.68855	4.58982		hypothetical protein predicted by genemark.hmm
261792_at	At1g15950	0.00577545	0.736395	0.0145817	0.772948	0.00139807	0.96593		NS	NS	0.00139807		7.04934	7.41135	7.27628	7.44444		cinnamoyl CoA reductase, puitative similar to cinnamoyl CoA reductase GI:2058310 from [Eucalyptus gunnii]; supported by full-length cDNA: Ceres: 34141.
261845_at	At1g15960	0.16953	0.558805	0.148874	0.432451	0.349188	0.190469		NS	NS	NS		4.27185	4.10926	4.4144	4.40844		metal ion transporter, putative similar to metal ion transporter GI:5853313 from [Arabidopsis thaliana]
261788_at	At1g15980	0.101268	0.296928	0.421697	0.851071	0.97541	0.184906		NS	NS	NS		9.84684	9.75707	9.78318	9.84443		unknown protein ;supported by full-length cDNA: Ceres:122986.
261786_at	At1g15990	0.904654	0.713169	0.582616	0.293365	0.27443	0.306373		NS	NS	NS		3.52383	3.51493	3.48282	3.43809		cyclic nucleotide and calmodulin-regulated ion channel protein, putative similar to cyclic nucleotide and calmodulin-regulated ion channel protein GI:4581207 from [Arabidopsis thaliana]
261790_at	At1g16000	0.000518571	0.69402	0.00682381	0.264053	0.00100793	0.0804054		0.000518571	NS	0.00100793		6.27593	5.53708	5.7964	5.68847		unknown protein ; supported by full-length cDNA: Ceres: 30167.
261795_at	At1g16010	0.247724	0.827816	0.116453	0.334595	0.359121	0.667048		NS	NS	NS		6.31522	6.45834	6.47509	6.40143		unknown protein ; supported by cDNA: gi_15451153_gb_AY054657.1_
261787_at	At1g16020	0.00933212	0.132237	0.0395009	0.68496	0.372166	0.641548		NS	NS	NS		5.93364	5.56485	5.66226	5.81275		hypothetical protein predicted by genemark.hmm;supported by full-length cDNA: Ceres:93534.
261838_at	At1g16030	0.245102	0.842048	0.309057	0.375673	0.642687	0.769989		NS	NS	NS		4.15351	3.97764	4.02794	4.09825		heat shock protein hsp70, putative similar to heat shock protein hsp70 GI:1771478 from [Pisum sativum]
261839_at	At1g16040	0.15475	0.849429	0.841948	0.345722	0.721245	0.582537		NS	NS	NS		4.55309	4.41506	4.57069	4.61762		unknown protein
261835_at	At1g16050	0.494893	0.924447	0.30093	0.379111	0.0318379	0.225833		NS	NS	NS		4.11902	4.15772	4.17394	4.22519		hypothetical protein contains similarity to phosphatidyl-inositol-glycan protein GI:303615 from [Homo sapiens]
261794_at	At1g16060	0.827493	0.510468	0.0654753	0.129994	0.391171	0.101127		NS	NS	NS		4.65717	4.63126	5.1897	4.7356		hypothetical protein contains similarity to AP2 DNA-binding domain protein GI:1732030 from [Zea mays]; supported by cDNA: gi_15028184_gb_AY045915.1_
261840_at	At1g16070	0.641707	0.0295634	0.446284	0.55565	0.701855	0.156665		NS	NS	NS		3.16594	3.20848	3.23924	3.13341		hypothetical protein contains similarity to tubby related proteins
261793_at	At1g16080	0.248785	0.318014	0.183007	0.858846	0.394039	0.207269		NS	NS	NS		7.92589	7.76889	7.74851	7.80089		unknown protein ; supported by cDNA: gi_12083327_gb_AF332460.1_AF332460
261836_at	At1g16090	0.220598	0.670259	0.524213	0.747842	0.108676	0.408076		NS	NS	NS		3.73829	3.6478	3.79528	3.88833		hypothetical protein contains similarity to wall-associated kinase 2 GI:4826399 from [Arabidopsis thaliana]
257478_at	At1g16130	0.0578667	0.579199	0.685854	0.0158258	0.323858	0.237028		NS	NS	NS		3.49487	3.67986	3.53121	3.57821		hypothetical protein similar to putative serine/threonine-specific protein kinase GI:7270012 from [Arabidopsis thaliana]
257479_at	At1g16150	0.485388	0.887651	0.390815	0.344235	0.769394	0.863187		NS	NS	NS		3.53483	3.46759	3.45097	3.51036		hypothetical protein contains similarity to wall-associated kinase 4 GI:3355308 from [Arabidopsis thaliana]
261842_at	At1g16160	0.669544	0.927923	0.306847	0.123583	0.508888	0.759786		NS	NS	NS		3.25913	3.30448	3.35463	3.33062		hypothetical protein contains similarity to wall-associated kinase 4 GI:3355308 from [Arabidopsis thaliana]
261791_at	At1g16170	0.582925	0.788205	0.901843	0.846286	0.51856	0.666524		NS	NS	NS		5.96775	5.84568	5.94876	5.8464		unknown protein ; supported by full-length cDNA: Ceres: 32430.
261843_at	At1g16180	0.118578	0.70115	0.197245	0.641193	0.191618	0.914393		NS	NS	NS		8.90733	9.09613	9.03123	9.07221		unknown protein
262708_at	At1g16190	0.623282	0.796552	0.732099	0.782305	0.199018	0.398104		NS	NS	NS		4.37051	4.31257	4.33078	4.2057		UV-sensitive rad23, putative similar to UV-sensitive rad23 protein GI:1914684 from [Daucus carota]
262710_at	At1g16210	0.138279	0.884265	0.860095	0.261244	0.620529	0.487042		NS	NS	NS		7.65384	7.80117	7.63964	7.71918		unknown protein ESTs gb|T04357 and gb|AA595092 come from this gene;supported by full-length cDNA: Ceres:114103.
262702_at	At1g16220	0.357233	0.169905	0.0712606	0.288457	0.420851	0.178626		NS	NS	NS		3.4873	3.56193	3.66217	3.55995		putative protein phosphatase 2C similar to GB:AAC36699
262709_at	At1g16240	0.0529514	0.937345	0.025242	0.686661	0.0287783	0.739425		NS	NS	NS		7.8873	8.1355	8.1874	8.16995		unknown protein ESTs gb|F15498, gb|H37515, gb|T41906, gb|T22448, gb|W43356 and gb|T20739 come from this gene;supported by full-length cDNA: Ceres:145295.
262705_at	At1g16260	0.255715	0.177857	0.0689348	0.554071	0.895506	0.886691		NS	NS	NS		6.74829	6.55097	7.00315	6.77848		putative wall-associated kinase similar to gb|AJ012423 wall-associated kinase 2 from Arabidopsis thaliana
262706_at	At1g16280	0.529121	0.0436352	0.0208188	0.679942	0.148227	0.845227		NS	NS	NS		4.87769	4.79498	4.62068	4.635		putative ATP-dependent RNA helicase similar to gb|L13612 DEAD-box protein (dbp45A) from Drosophila melanogaster and is a member of PF|00270 DEAD/DEAH box helicase family
262707_at	At1g16290	0.0973995	0.469227	0.242864	0.355535	0.0565796	0.315013		NS	NS	NS		3.71368	3.56565	3.63035	3.55734		hypothetical protein
262751_at	At1g16310	0.897271	0.392358	0.902944	0.466981	0.42756	0.0235721		NS	NS	NS		4.04249	4.03066	4.0559	3.97787		hypothetical protein predicted by genscan+
262752_at	At1g16330	0.441216	0.389843	0.55514	0.360321	0.411745	0.459336		NS	NS	NS		3.53458	3.68281	3.44084	3.65948		putative mitotic cyclin similar to gb|D89635 B-type cyclin from Nicotiana tabacum and is a member of the PF|00134 Cyclin family
262753_at	At1g16340	0.380672	0.971043	0.295232	0.738336	0.112425	0.104352		NS	NS	NS		5.9286	5.80419	5.79663	5.72136		putative 3-deoxy-D-manno-2-octulosonate-8-phosphate synthase similar to gb|Y14272 3-deoxy-D-manno-2-octulosonate-8-phosphate synthase from Pisum sativum
262754_at	At1g16350	0.176928	0.106885	0.164234	0.574302	0.113529	0.158387		NS	NS	NS		6.51591	6.35681	6.29288	6.24658		putative inosine-5-monophosphate dehydrogenase strong similarity to gb|L34684 inosine monophosphate dehydrogenase (IMPDH) from Arabidopsis thaliana and is a member of the PF|00478 IMP dehydrogenase family
262755_at	At1g16360	0.567242	0.669265	0.389871	0.0531401	0.506441	0.570755		NS	NS	NS		3.28342	3.22967	3.19797	3.2131		unknown protein
262756_at	At1g16370	0.487748	0.608571	0.944525	0.5629	0.935857	0.345866		NS	NS	NS		3.4656	3.33154	3.45248	3.45055		putative transport protein may be a member of the PF|00083 sugar transporter family
262757_at	At1g16380	0.0751866	0.921162	0.404372	0.431709	0.0196087	0.312939		NS	NS	NS		3.6765	3.54047	3.59416	3.48362		putative Na/H antiporter similar to gi|4835769 T8K14.18 putative Na/H antiporter isolog from Arabidopsis thaliana BAC gb|AC007202
262730_at	At1g16390	0.0023544	0.535315	0.0757758	0.897455	0.991893	0.559059		0.0023544	NS	NS		3.74522	4.67	4.37458	3.74461		putative transport protein may be a member of the PF|00083 sugar transporter family
262717_s_at	At1g16410	0.0233325	0.568849	0.159863	0.983452	0.69445	0.918303		NS	NS	NS		5.90449	6.87441	6.89314	5.83168		putative cytochrome P450 similar to gb|AF069494 cytochrome P450 from Sinapis alba and is a member of the PF|00067 Cytochrome P450 family. EST gb|F14190 comes from this gene; supported by cDNA: gi_15208670_gb_AY035021.2_
262731_at	At1g16420	0.823077	0.331472	0.957488	0.88503	0.472248	0.795153		NS	NS	NS		3.18645	3.17145	3.1835	3.2348		hypothetical protein similar to gb|AF098458 latex-abundant protein (LAR) from Hevea brasiliensis
262714_s_at	At1g16430	0.00486882	0.842715	0.950443	0.820727	0.179206	0.355326		NS	NS	NS		5.21265	4.96769	5.22079	5.15077		unknown protein similar to gb|AJ224359 surfeit locus protein 5 (surf5b) from Homo sapiens;supported by full-length cDNA: Ceres:143886.
262732_at	At1g16440	0.907233	0.623595	0.351909	0.871443	0.356318	0.456812		NS	NS	NS		3.12885	3.11757	3.23378	3.21085		putative protein kinase similar to gb|J04556 G11A protein from Oryza sativa and contains a PF|00069 Eukaryotic protein kinase domain
262712_at	At1g16460	0.768974	0.198382	0.484422	0.58817	0.893934	0.966734		NS	NS	NS		7.80093	7.82627	7.71269	7.81526		mercaptopyruvate sulfurtransferase (Mst2/Rdh2) identical to mercaptopyruvate sulfurtransferase GI:6009983 and thiosulfate sulfurtransferase GI:5817004 from [Arabidopsis thaliana]; contains PF|00581 Rhodanese-like domain; supported by full-length cDNA: Ceres:111646.
262716_at	At1g16470	0.024507	0.697562	0.0819604	0.739809	0.771443	0.671261		NS	NS	NS		7.65591	7.49049	7.74657	7.63059		multicatalytic endopeptidase identical to GB:CAA73619, ESTs gb|H36972, gb|T22551 and gb|T13800 come from this gene;supported by full-length cDNA: Ceres:8633.
262701_at	At1g16480	0.685227	0.519726	0.63505	0.0791444	0.548161	0.963009		NS	NS	NS		3.17873	3.21107	3.14141	3.12321		hypothetical protein predicted by genscan+
262715_at	At1g16490	0.298117	0.0283891	0.453442	0.0105399	0.718946	0.337666		NS	NS	NS		3.14868	3.08726	3.11035	3.16741		putative myb-related transcription factor similar to gb|Y11352 myb factor from Oryza sativa;supported by full-length cDNA: Ceres:152630.
262711_at	At1g16500	3.19761e-06	0.140708	0.000387781	0.538612	0.00112934	0.407916		3.19761e-06	0.000387781	0.00112934		5.85362	4.87398	5.10249	5.29523		hypothetical protein predicted by genscan+;supported by full-length cDNA: Ceres:109912.
262703_at	At1g16510	0.0235624	0.0362352	0.00145015	0.466295	0.0312408	0.10401		NS	NS	NS		5.3825	5.16023	5.04103	5.25205		putative auxin-induced protein similar to gb|D14414 Indole-3-acetic acid induced protein from Vigna radiata. ESTs gb|AA712892 and gb|Z17613 come from this gene
262713_at	At1g16520	0.000990055	0.597545	0.065537	0.536559	0.00096463	0.470567		0.000990055	NS	0.00096463		4.67687	4.27733	4.45599	4.36347		unknown protein
262704_at	At1g16530	0.924457	0.0448207	0.365381	0.0956934	0.160802	0.922206		NS	NS	NS		3.64082	3.63351	3.70055	3.74319		hypothetical protein predicted by genscan
246325_at	At1g16540	0.0845707	0.0841497	0.366226	0.126062	0.580737	0.289075		NS	NS	NS		3.67505	3.5038	3.78227	3.61757		hypothetical protein contains similarity to molybdopterin cofactor sulfurase GI:8978317 from [Bos taurus]; supported by cDNA: gi_13123672_gb_AF325457.1_AF325457
246320_at	At1g16560	0.310945	0.827383	0.681939	0.701337	0.55399	0.807774		NS	NS	NS		7.1715	6.90051	7.05941	7.01019		unknown protein
246351_at	At1g16570	0.560998	0.624505	0.063211	0.997903	0.50694	0.60272		NS	NS	NS		6.14924	6.06526	5.85308	6.05322		unknown protein contains similarity to beta-1,4 mannosyltransferase GI:6970470 from [Homo sapiens]
246326_at	At1g16590	0.632216	0.77503	0.863554	0.412183	0.248686	0.780595		NS	NS	NS		3.96282	3.87868	3.98085	4.11298		unknown protein ; supported by cDNA: gi_14583009_gb_AF372829.1_AF372829
246324_at	At1g16610	0.931978	0.770385	0.460733	0.425709	0.963831	0.132722		NS	NS	NS		6.03045	6.04575	6.15255	6.02264		arginine/serine-rich protein, putative similar to arginine/serine-rich protein GI:6601502 from [Arabidopsis thaliana]; supported by cDNA: gi_15027956_gb_AY045835.1_
246321_at	At1g16640	0.674796	0.872756	0.284967	0.156552	0.17846	0.566427		NS	NS	NS		3.14406	3.17199	3.20206	3.21505		unknown protein
246350_at	At1g16650	0.166167	0.624604	0.814574	0.15241	0.9738	0.555711		NS	NS	NS		4.33008	4.42816	4.34214	4.33231		hypothetical protein predicted by genemark.hmm
246327_at	At1g16670	0.00138828	0.191225	0.0592166	0.646883	0.0493616	0.894011		0.00138828	NS	NS		6.25135	5.59706	5.95608	5.74408		receptor-like serine/threonine kinase, putative similar to receptor-like serine/threonine kinase GI:2465923 from [Arabidopsis thaliana]; supported by cDNA: gi_16649102_gb_AY059921.1_
246322_at	At1g16680	0.276926	0.230932	0.175388	0.242913	0.700011	0.88327		NS	NS	NS		5.52159	5.61728	5.65979	5.55315		S-locus protein, putative similar to S-locus protein 5 GI:6069485 from [Brassica rapa]
246323_at	At1g16690	0.22861	0.325815	0.0362031	0.213711	0.725792	0.578351		NS	NS	NS		4.48481	4.39119	4.21253	4.44412		hypothetical protein predicted by genemark.hmm
255768_at	At1g16705	0.28673	0.830597	0.419228	0.529094	0.109445	0.665074		NS	NS	NS		3.13705	3.21192	3.19778	3.25904		Expressed protein ; supported by full-length cDNA: Ceres: 116789.
255762_at	At1g16710	0.322278	0.367683	0.0125832	0.883601	0.0629656	0.11763		NS	NS	NS		5.03064	5.13937	5.26058	5.27643		unknown protein contains Pfam profile: PF02135 TAZ zinc finger
255764_at	At1g16720	0.304747	0.292366	0.414418	0.748059	0.00123544	0.162831		NS	NS	0.00123544		8.91758	9.04399	9.01271	9.2983		unknown protein
255763_at	At1g16730	0.408626	0.750807	0.549842	0.486905	0.31537	0.370318		NS	NS	NS		3.80856	3.89901	3.74216	3.92918		hypothetical protein predicted by genemark.hmm
255767_at	At1g16740	0.0386076	0.0393772	0.294226	0.94764	0.830382	0.765978		NS	NS	NS		7.32612	7.11636	7.2456	7.30758		ribosomal protein L20, putative similar to ribosomal protein L20 GI:3603025 from [Guillardia theta];supported by full-length cDNA: Ceres:255.
255766_at	At1g16750	0.00160674	0.337931	0.243435	0.152323	0.0851374	0.469536		0.00160674	NS	NS		5.19424	4.83839	5.08226	5.08752		unknown protein ;supported by full-length cDNA: Ceres:121070.
255765_at	At1g16760	0.854813	0.748551	0.686586	0.703399	0.432496	0.556737		NS	NS	NS		2.90185	2.88716	2.86417	2.83967		protein kinase, putative contains Pfam profile: PF00069: eukaryotic protein kinase domain
255761_at	At1g16770	0.332636	0.191422	0.912311	0.0612887	0.899237	0.930983		NS	NS	NS		3.68379	3.58482	3.67208	3.69465		hypothetical protein predicted by genscan+
255760_at	At1g16780	0.224459	0.691042	0.47586	0.567181	0.340029	0.437854		NS	NS	NS		5.09366	4.834	4.94186	4.87622		vacuolar-type H+-translocating inorganic pyrophosphatase, putative similar to vacuolar-type H+-translocating inorganic pyrophosphatase GI:6901678 from [Arabidopsis thaliana]
255759_at	At1g16790	0.193702	0.0545442	0.404324	0.0540281	0.361393	0.160047		NS	NS	NS		4.59001	4.45855	4.5113	4.50605		hypothetical protein predicted by genemark.hmm
255758_at	At1g16800	0.240653	0.158737	0.906276	0.64573	0.0161455	0.556353		NS	NS	NS		3.20222	3.29364	3.19256	3.40026		hypothetical protein predicted by genemark.hmm
256113_at	At1g16810	0.0368693	0.72294	0.0236197	0.321269	0.0191732	0.71342		NS	NS	NS		7.25209	7.5657	7.55326	7.51814		unknown protein ;supported by full-length cDNA: Ceres:4887.
256111_at	At1g16820	0.709934	0.505383	0.805197	0.575053	0.177858	0.989265		NS	NS	NS		3.61655	3.65131	3.63914	3.75516		unknown protein
256107_at	At1g16830	0.626009	0.684225	0.0133788	0.148029	0.268753	0.541258		NS	NS	NS		3.86049	3.82	3.6027	3.74627		hypothetical protein predicted by genscan+
256117_at	At1g16840	0.147196	0.473537	0.116168	0.862727	0.000973059	0.949106		NS	NS	0.000973059		7.56032	7.73561	7.7032	8.09979		unknown protein ; supported by cDNA: gi_15450362_gb_AY052282.1_
256114_at	At1g16850	0.0683859	0.343614	0.337366	0.162133	0.890087	0.83123		NS	NS	NS		6.47881	6.00036	6.28678	6.51577		unknown protein ; supported by cDNA: gi_13358195_gb_AF325003.2_AF325003
256116_at	At1g16860	0.741369	0.955209	0.269353	0.820456	0.0780425	0.513752		NS	NS	NS		6.14662	6.09251	5.96261	5.83533		unknown protein contains similarity to merozoite surface protein 2 (MSP-2) GI:1657451 from [Plasmodium falciparum]; supported by cDNA: gi_15292906_gb_AY050887.1_
256106_at	At1g16870	0.00675542	0.232553	0.00659478	0.634264	0.00172454	0.337052		NS	NS	0.00172454		7.25397	6.95459	7.02964	6.97747		unknown protein
256115_at	At1g16880	0.00192664	0.298803	0.00934498	0.232213	0.00195183	0.657409		0.00192664	NS	0.00195183		10.2414	9.72594	9.89334	9.6942		unknown protein ; supported by cDNA: gi_14423501_gb_AF386988.1_AF386988
256110_at	At1g16900	0.94651	0.777914	0.210708	0.914432	0.410537	0.176488		NS	NS	NS		4.96268	4.95661	5.11926	4.89133		Ser Thr protein kinase, putative similar to Ser Thr protein kinase GI:2598067 from (Zea mays)
256105_at	At1g16910	0.406562	0.385765	0.302634	0.0925648	0.714846	0.490363		NS	NS	NS		3.58703	3.67756	3.48173	3.54583		hypothetical protein predicted by genemark.hmm
256112_at	At1g16920	0.0332316	0.803896	0.243451	0.197008	0.0420497	0.306409		NS	NS	NS		7.20535	7.03823	7.14387	7.09926		guanine nucleotide regulatory protein, putative similar to guanine nucleotide regulatory protein GI:452360 from [Vicia faba]; supported by full-length cDNA: Ceres: 2904.
256108_at	At1g16940	0.254393	0.365085	0.0703292	0.418113	0.680005	0.741367		NS	NS	NS		3.55018	3.44622	3.40542	3.58381		hypothetical protein predicted by genemark.hmm
256109_at	At1g16950	0.678542	0.922542	0.281313	0.248489	0.785822	0.638265		NS	NS	NS		2.99404	3.02768	3.101	3.0164		hypothetical protein predicted by genemark.hmm
256118_at	At1g16970	0.360447	0.447162	0.415422	0.677382	0.708136	0.456242		NS	NS	NS		5.19811	5.1084	5.09361	5.14638		hypothetical protein predicted by genemark.hmm; supported by cDNA: gi_12006423_gb_AF283759.1_AF283759
256104_at	At1g16980	0.559659	0.292603	0.75623	0.817692	0.969086	0.682436		NS	NS	NS		3.34196	3.38814	3.36772	3.33851		trehalose-6-phosphate synthase, putative similar to trehalose-6-phosphate synthase GI:4468259 from [Pichia angusta]
262535_at	At1g17000	0.976941	0.0904416	0.0837973	0.933049	0.810994	0.894096		NS	NS	NS		2.74036	2.74201	2.63603	2.72802		trehalose-6-phosphate synthase, putative similar to trehalose-6-phosphate synthase GI:4468259 from (Pichia angusta)
262527_at	At1g17010	0.515356	0.871819	0.579933	0.583121	0.478668	0.822963		NS	NS	NS		2.86219	2.81463	2.82383	2.81263		SRG1-like protein Strong homology to SRG1 protein, a new member of the Fe(II)/ascorbate oxidase superfamily, 73% identical to SRG1 [Arabidopsis thaliana] (gi|479047). Location of ests 147E17T7 (gb|T76176) and 136D2T7 (gb|T45959)
262482_at	At1g17020	0.965881	0.54504	0.209462	0.459859	0.891995	0.419717		NS	NS	NS		3.00548	3.00862	3.0867	3.01427		SRG1-like protein Strong homology to SRG1 protein, a new member of the Fe(II)/ascorbate oxidase superfamily, Similar to SRG1 protein [Arabidopsis thaliana] (gi|629561). Location of est F1A5T7 (gb|N96370); supported by cDNA: gi_15081818_gb_AY048302.1_
262534_at	At1g17040	0.412774	0.640868	0.225086	0.302371	0.0926458	0.763042		NS	NS	NS		4.09295	4.19771	4.24771	4.32968		unknown protein contains Pfam profile: PF00017 Src homology domain 2
262526_at	At1g17050	0.23612	0.303944	0.276073	0.388124	0.15767	0.0277614		NS	NS	NS		4.4319	4.27449	4.28072	4.25416		putative prenyl transferase (prephytoene pyrophosphatase dehydrogenase) Except for first 55 amino acids, 52% identical to Prenyl transferase [Cyanophora paradoxa] (gi|99282). Location of est 120E9T7 (gb|T43950)
262525_at	At1g17060	0.680241	0.037404	0.815586	0.268286	0.931817	0.317231		NS	NS	NS		3.41508	3.44932	3.44302	3.40642		putative cytochrome P450 41% identical to Cytochrome P450 [Catharanthus roseus] (gi|404690)
262524_at	At1g17070	0.138049	0.719232	0.273053	0.577015	0.516538	0.0258358		NS	NS	NS		4.67373	4.4431	4.45551	4.58198		tuftelin-interacting-like protein Similar to tuftelin-interacting proteins [Mus musculus] (gi|3851164 and gi|5059423)
262481_at	At1g17080	0.954635	0.395582	0.102652	0.304516	0.683548	0.407376		NS	NS	NS		8.01291	8.00622	8.18494	8.05971		unknown protein Location of ests 147K6T7 (gb|T75883), 91C11T7 (gb|AA067428), 162K21T7 (gb|R29908), 91C11XP 3 (gb|AI100498), 162K21XP 3 (gb|AA650983), and 147K6TM 3 (gb|AI100730); supported by cDNA: gi_15010587_gb_AY045595.1_
262533_at	At1g17090	0.0830308	0.436294	0.164105	0.906201	0.622919	0.891308		NS	NS	NS		4.47209	4.09291	4.23011	4.39328		hypothetical protein Pfam
262536_at	At1g17100	0.0434567	0.56244	0.123535	0.92186	0.166874	0.880279		NS	NS	NS		9.36549	9.02733	9.11191	9.13317		SOUL-like protein Similar to SOUL Protein [Mus musculus] (gi|4886906) and [Homo sapiens] (gi|4886910). Location of ests PAP043 5 (gb|Z27017), PAP043 3 (gb|Z29848), 153N19T7 (gb|AA720145), and 212B8T7 (gb|N37862);supported by full-length cDNA: Ceres:29992.
262523_at	At1g17110	0.0313385	0.24382	0.111925	0.734519	0.180353	0.564467		NS	NS	NS		5.75815	6.02576	5.90368	5.87652		ubiquitin-specific protease 15 (UBP15) almost identical to ubiquitin-specific protease 15 GI:11993475 [Arabidopsis thaliana], 7 amino acid difference; supported by cDNA: gi_11993474_gb_AF302665.1_AF302665
262522_at	At1g17120	0.863028	0.482633	0.364061	0.507179	0.938053	0.261462		NS	NS	NS		6.24577	6.26239	6.33382	6.23907		putative amino acid transporter Very similar to amino acid transporter AAT1 [Arabidopsis thaliana] (gi|1076291)
262521_at	At1g17130	0.265596	0.14888	0.892037	0.11682	0.851839	0.242669		NS	NS	NS		5.41017	5.27752	5.39485	5.42922		unknown protein Location of est 278F3T7 (gb|AA650690)
262538_at	At1g17140	0.30082	0.557512	0.589283	0.969747	0.495199	0.486906		NS	NS	NS		4.77592	4.88668	4.83864	4.83958		Expressed protein ; supported by full-length cDNA: Ceres: 156655.
262512_at	At1g17145	0.0220612	0.731259	0.0894905	0.598516	0.00270168	0.265176		NS	NS	NS		5.1659	5.50527	5.38471	5.62002		Expressed protein ; supported by full-length cDNA: Ceres: 6612.
262520_at	At1g17150	0.064648	0.0413337	0.468883	0.672598	0.503275	0.93725		NS	NS	NS		3.58563	3.7041	3.55033	3.63475		putative polygalacturonase After first 29 amino acids, 43% identical to polygalacturonase [Medicago sativa] (gi|3413322)
262519_at	At1g17160	0.478836	0.922017	0.286974	0.60028	0.94863	0.844646		NS	NS	NS		6.75473	6.88051	6.94291	6.76755		putative ribokinase Except for first 69 amino acids, 33% identical to ribokinase (EC 2.7.1.15) [Bacillus subtilis] (gi|397495)
262518_at	At1g17170	0.139564	0.342089	0.0807228	0.0112604	0.0866632	0.416593		NS	NS	NS		3.03698	3.2905	3.18323	3.19966		putative glutathione transferase One of three repeated putative glutathione transferases. 72% identical to glutathione transferase [Arabidopsis thaliana] (gi|4006934)
262517_at	At1g17180	0.897656	0.864438	0.379533	0.414075	0.634521	0.676002		NS	NS	NS		3.05856	3.06549	3.12844	3.08918		putative glutathione transferase Second of three repeated putative glutathione transferases. 72% identical to glutathione transferase [Arabidopsis thaliana] (gi|4006934). Location of ests 191A10T7 (gb|R90188) and 171N13T7 (gb|R65532)
262516_at	At1g17190	0.196747	0.760141	0.0795064	0.212617	0.153429	0.720927		NS	NS	NS		3.66168	3.85031	3.90467	3.87219		putative glutathione transferase One of three repeated glutathione transferases. 65% identical to glutathione transferase [Arabidopsis thaliana] (gi|4006934). Location of est 141C5T7 (gb|T46669)
262539_at	At1g17200	0.118463	0.289911	0.222052	0.512412	0.0614994	0.280021		NS	NS	NS		7.36698	7.57505	7.53967	7.69118		unknown protein Location of est 136A23T7 (gb|T45563); supported by full-length cDNA: Ceres: 28177.
262532_at	At1g17210	0.657592	0.806835	0.335516	0.170325	0.711627	0.567549		NS	NS	NS		5.72873	5.79351	5.87378	5.78682		hypothetical protein predicted by genscan+
262483_at	At1g17220	0.320106	0.193878	0.798934	0.977023	0.92794	0.516242		NS	NS	NS		9.62377	9.76536	9.66559	9.61136		putative translation initiation factor IF2 Except for first 311 amino acids, 41% identical to translation initiation factor IF2 [Bacillus subtilis] (gi|124209) Location of ests H3F7T7 (gb|W43659), 173N7T7 (gb|H36495), and 177D2T7 (gb|H36282); supported by cDNA: gi_13605888_gb_AF367343.1_AF367343
262531_at	At1g17230	0.969138	0.232074	0.469422	0.900752	0.889698	0.0444619		NS	NS	NS		3.78318	3.78644	3.83039	3.79239		putative leucine-rich receptor protein kinase 34% identical to leucine-rich receptor-like protein kinase [Ipomoea nil] (gi|1684913) and 35% identical to leucine-rich receptor-like protein kinase [Malus domestica] (gi|3641252)
262530_at	At1g17240	0.686329	0.782086	0.969497	0.835782	0.978475	0.738605		NS	NS	NS		3.47475	3.41223	3.48039	3.47898		putative receptor protein kinase Approximately 30% identical to disease resistance genes [Lycopersicon pimpinellifolium] (gi|1184077 and gi|1184075) and [Lycopersicon esculentum] (gi|3894387 and gi|3894393)
262529_at	At1g17250	0.706865	0.71217	0.34643	0.794251	0.816095	0.686533		NS	NS	NS		4.10619	4.04243	3.97551	4.07444		putative receptor protein kinase Approximately 30% identical to disease resistance proteins [Lycopersicon esculentum] (gi|3894387 and gi|3894393) and [Lycopersicon pimpinellifolium] (gi|1184075 and gi|1184077)
262528_at	At1g17260	0.463495	0.245447	0.558716	0.705516	0.650339	0.682481		NS	NS	NS		3.1105	3.03261	3.06209	3.07182		H+-transporting ATPase AHA10 Identical to H+-transporting ATPase (EC 3.6.1.35) AHA10 [Arabidopsis thaliana] (gi|765354) plasma membrane H(+)-ATPase isoform AHA10=P-type ATPase
262537_s_at	At1g17280	0.704241	0.753449	0.960468	0.446391	0.538492	0.982798		NS	NS	NS		6.84004	6.79056	6.8336	6.92885		putative ubiquitin-conjugating enzyme First 212 a.a. are 41% identical to Ubiquitin-Conjugating Enzyme E2 [Saccharomyces cerevisiae] (gi|480374). Location of ests H36180 14702 Lambda-PRL2 cDNA clone 175C6T7 (gb|H36180) and H36169 14691 Lambda-PRL2 cDNA clone 175B6T7 (gb|H36169);supported by f
260847_s_at	At1g17290	0.230064	0.333057	0.00486778	0.246332	0.0437233	0.124701		NS	NS	NS		8.60348	8.71185	8.84422	8.78468		alanine aminotransferase, putative similar to alanine aminotransferase GB:AAC62456 GI:3694807 from [Zea mays]
260846_at	At1g17300	0.0741566	0.304072	0.356614	0.0928077	0.994932	0.0194858		NS	NS	NS		3.25861	3.34483	3.21561	3.259		unknown protein
260845_at	At1g17310	0.69454	0.755907	0.66134	0.716435	0.329026	0.25786		NS	NS	NS		3.76957	3.71405	3.713	3.63888		transcription factor, putative similar to transcription factor GB:BAA25245 GI:2981610 from [Ceratopteris richardii]
261029_at	At1g17330	0.365045	0.794677	0.860413	0.077818	0.689197	0.384709		NS	NS	NS		4.14494	4.26277	4.16721	4.2231		unknown protein
261060_at	At1g17340	0.893029	0.11776	0.404099	0.812074	0.64353	0.988627		NS	NS	NS		4.16015	4.17623	4.05714	4.21018		unknown protein
261087_at	At1g17350	0.409479	0.583012	0.629393	0.289694	0.286047	0.700586		NS	NS	NS		4.79848	4.89311	4.85365	4.66919		hypothetical protein similar to unknown protein GB:AAF27148 GI:6730759 from [Arabidopsis thaliana]
261031_at	At1g17360	0.00539508	0.420551	0.0371871	0.306777	0.0781714	0.0455182		NS	NS	NS		5.95357	5.54212	5.68114	5.6902		hypothetical protein predicted by genemark.hmm
261040_at	At1g17370	0.076628	0.501174	0.123944	0.69956	0.188168	0.851454		NS	NS	NS		7.30559	7.00851	7.05591	7.10339		oligouridylate binding protein, putative similar to GB:CAB75429 from (Nicotiana plumbaginifolia) (EMBO J. 19, 1638-1649 (2000));supported by full-length cDNA: Ceres:17210.
261033_at	At1g17380	0.596409	0.864949	0.435609	0.727602	0.555725	0.404292		NS	NS	NS		4.16796	3.97699	3.89116	3.96301		unknown protein ;supported by full-length cDNA: Ceres:37370.
261035_at	At1g17390	0.95733	0.432537	0.601753	0.328965	0.339478	0.142036		NS	NS	NS		2.80055	2.80364	2.76327	2.73697		hypothetical protein contains Pfam profile: PF00075 RNase H
261030_at	At1g17410	0.996422	0.704524	0.928904	0.675826	0.435277	0.346266		NS	NS	NS		4.29667	4.29633	4.28802	4.35606		unknown protein contains similarity to nucleoside diphosphate kinase GB:U41267 GI:1353654 from [Pseudomonas aeruginosa]
261037_at	At1g17420	0.175388	0.933779	0.173588	0.898905	0.193879	0.930329		NS	NS	NS		4.81236	3.90884	3.89466	3.9535		lipoxygenase identical to GB:CAB56692 from (Arabidopsis thaliana)
261032_at	At1g17430	0.0203331	0.222275	0.529104	0.389141	0.0156959	0.69537		NS	NS	NS		6.40599	5.31898	6.21008	5.29213		unknown protein ;supported by full-length cDNA: Ceres:32887.
261041_at	At1g17440	0.120806	0.444051	0.755301	0.860518	0.828813	0.549699		NS	NS	NS		6.74531	6.5434	6.78532	6.77541		hypothetical protein contains similarity to transcription factor TFIID GB:U57693 GI:1373376 from (Homo sapiens); supported by cDNA: gi_15810158_gb_AY056144.1_
261034_s_at	At1g17450	0.34002	0.638175	0.695743	0.103363	0.489128	0.504852		NS	NS	NS		3.32943	3.23143	3.37117	3.42194		hypothetical protein predicted by genemark.hmm
261039_at	At1g17455	0.363631	0.752347	0.0418416	0.559087	0.528273	0.149207		NS	NS	NS		4.53299	4.6681	4.83677	4.6116		Expressed protein ; supported by full-length cDNA: Ceres: 1349.
261086_at	At1g17460	0.0667708	0.0213908	0.0770795	0.752014	0.00256269	0.781683		NS	NS	NS		3.96975	4.15602	4.21427	4.36575		hypothetical protein predicted by genemark.hmm
261036_at	At1g17470	0.0133987	0.717212	0.128077	0.531199	0.593091	0.963798		NS	NS	NS		7.47237	7.66985	7.56681	7.5112		developmentally regulated GTP-binding protein identical to GB:AAB67830 from (Arabidopsis thaliana) (Plant Mol. Biol. 39 (1), 75-82 (1999)); supported by cDNA: gi_2058455_gb_U66408.1_ATU66408
261085_at	At1g17480	0.777731	0.311667	0.480177	0.492357	0.375609	0.397105		NS	NS	NS		4.08079	4.05189	4.01099	4.17386		hypothetical protein similar to hypothetical protein GB:AAF21161 GI:6648161 from [Arabidopsis thaliana]
261038_at	At1g17490	0.00421105	0.944904	0.24799	0.051021	0.470999	0.169868		NS	NS	NS		6.16584	5.97765	6.09142	6.09876		unknown protein ; supported by full-length cDNA: Ceres: 13391.
260731_at	At1g17500	0.38732	0.339576	0.663411	0.98529	0.973914	0.147343		NS	NS	NS		4.79382	4.67529	4.85011	4.79813		P-type ATPase, putative similar to GB:AAC63461 from [Homo sapiens] (Nat. Genet. 18 (3), 219-224 (1998))
260682_at	At1g17510	0.257167	0.242578	0.370282	0.0804347	0.505024	0.0190977		NS	NS	NS		5.29732	5.15961	5.24103	5.34039		hypothetical protein predicted by genemark.hmm;supported by full-length cDNA: Ceres:40884.
260732_at	At1g17520	0.00973848	0.0787166	0.133221	0.0212975	0.00703918	0.019378		NS	NS	NS		3.98906	4.219	4.08155	4.18656		myb-related DNA-binding protein, putative similar to GB:U67132 from [Petroselinum crispum] (Plant J. 11 (5), 1079-1093 (1997))
260687_at	At1g17530	0.516346	0.816441	0.254124	0.667773	0.459825	0.440054		NS	NS	NS		5.25824	5.3373	5.38184	5.35974		inner mitochondrial membrane protein, putative similar to GB:AAA57314 from [Arabidopsis thaliana]; supported by cDNA: gi_15010569_gb_AY045586.1_
260737_at	At1g17540	0.213965	0.395787	0.0885367	0.0535068	0.549205	0.53404		NS	NS	NS		3.43923	3.50682	3.53101	3.47179		receptor-like serine threonine kinase, putative similar to receptor-like serine threonine kinase GI:2465923 from (Arabidopsis thaliana)
260710_at	At1g17545	0.748815	0.66451	0.547167	0.224581	0.550559	0.828504		NS	NS	NS		3.37682	3.40357	3.42995	3.32178		protein phosphatase 2C, putative similar to protein phosphatase 2C GI:3242077 from (Arabidopsis thaliana)
260712_at	At1g17550	0.00731984	0.486675	0.00833871	0.0219971	0.898512	0.0834782		NS	NS	NS		6.02118	5.80787	5.8572	6.03318		protein phosphatase 2C, putative similar to protein phosphatase 2C GI:3242077 from (Arabidopsis thaliana)
260683_at	At1g17560	0.00496389	0.529681	0.00111772	0.7271	0.00126938	0.0371112		NS	0.00111772	0.00126938		4.17518	3.67163	3.68256	3.69787		ribosomal protein, putative similar to GB:Z98756 from [Mycobacterium leprae];supported by full-length cDNA: Ceres:28484.
260711_at	At1g17580	0.0796983	0.672438	0.131633	0.326492	0.18962	0.442564		NS	NS	NS		4.97626	5.21258	5.16716	5.13722		myosin, putative similar to myosin GI:433663 from (Arabidopsis thaliana)
260684_at	At1g17590	0.898664	0.0400113	0.245323	0.443196	0.729255	0.934691		NS	NS	NS		3.38978	3.39653	3.49251	3.36435		transcription factor, putative similar to GB:CAA74050 from [Arabidopsis thaliana];supported by full-length cDNA: Ceres:106674.
260734_at	At1g17600	0.0888986	0.545859	0.794168	0.590007	0.162316	0.814287		NS	NS	NS		3.85778	3.65495	3.88419	3.69146		disease resistance protein RPP1-WsB, putative similar to disease resistance protein RPP1-WsB GI:3860165 from (Arabidopsis thaliana)
260735_at	At1g17610	0.013007	0.168755	0.686253	0.801815	0.657297	0.500757		NS	NS	NS		4.54471	4.08912	4.50181	4.49254		disease resistance protein, putative similar to disease resistance protein GI:9758205 from (Arabidopsis thaliana)
260713_at	At1g17615	0.345036	0.984911	0.699629	0.750087	0.74866	0.720072		NS	NS	NS		2.75827	2.8195	2.79029	2.78398		disease resistance protein RPP1-WsA, putative similar to disease resistance protein RPP1-WsA GI:3860163 from (Arabidopsis thaliana)
260686_at	At1g17620	0.0883893	0.71661	0.336228	0.797753	0.00491395	0.83476		NS	NS	NS		5.64811	5.11256	5.34978	4.67308		unknown protein ; supported by cDNA: gi_13358204_gb_AF325013.2_AF325013
260736_at	At1g17630	0.37643	0.892647	0.3012	0.66626	0.839514	0.023135		NS	NS	NS		4.05707	3.96408	3.96507	4.07522		hypothetical protein predicted by genemark.hmm
260733_at	At1g17640	0.135078	0.211432	0.792404	0.537816	0.276869	0.994674		NS	NS	NS		3.76263	3.92117	3.73914	3.86523		RNA-binding protein, putative similar to GB:L02953 from [Xenopus laevis] (Nucleic Acids Res. 21, 999-1006 (1993))
260685_at	At1g17650	0.591209	0.581898	0.284344	0.602763	0.239276	0.54602		NS	NS	NS		6.59775	6.73907	6.87902	6.92745		Expressed protein ; supported by full-length cDNA: Ceres: 17110.
260688_at	At1g17665	0.00255904	0.0254871	0.0644828	0.518539	0.00475422	0.205726		NS	NS	NS		4.79971	5.29972	5.15608	5.30311		hypothetical protein similar to dehydrogenase-like protein GI:9279732 from [Arabidopsis thaliana]
259397_at	At1g17680	0.0139954	0.786971	0.0031995	0.690731	0.0648412	0.555918		NS	NS	NS		4.4618	4.60187	4.71058	4.67372		hypothetical protein predicted by genemark.hmm
259406_at	At1g17690	0.865626	0.928363	0.728586	0.329602	0.948172	0.214795		NS	NS	NS		5.47509	5.45498	5.42706	5.48281		hypothetical protein predicted by genemark.hmm; supported by cDNA: gi_15810522_gb_AY056300.1_
259398_at	At1g17700	0.799658	0.688473	0.041724	0.567769	0.383726	0.202498		NS	NS	NS		4.48201	4.46165	4.71264	4.60288		hypothetical protein predicted by genemark.hmm
259399_at	At1g17710	0.311877	0.973067	0.642295	0.72153	0.79257	0.642493		NS	NS	NS		3.34855	3.24222	3.29937	3.37595		hypothetical protein similar to putative phosphatase GI:3218467 from [Gallus gallus]
259404_at	At1g17720	0.122754	0.565238	0.0141659	0.316092	0.00647835	0.349802		NS	NS	NS		6.33166	6.15667	6.01163	5.84035		type 2A protein serine/threonine phosphatase 55 kDa B regulatory subunit almost identical to type 2A protein serine/threonine phosphatase 55 kDa B regulatory subunit GI:1408460 from [Arabidopsis thaliana]; supported by cDNA: gi_15010727_gb_AY045665.1_
259402_at	At1g17730	0.0407328	0.822976	0.0239893	0.685435	0.0447501	0.842289		NS	NS	NS		7.05705	7.28262	7.29891	7.28003		developmental protein, putative similar to developmental protein DG1118 GI:3789911 from [Dictyostelium discoideum];supported by full-length cDNA: Ceres:16054.
259405_at	At1g17740	0.444215	0.0619405	0.0485102	0.773028	0.238936	0.429418		NS	NS	NS		3.03797	2.97314	2.8956	2.93313		Expressed protein ; supported by cDNA: gi_15028272_gb_AY046051.1_
259403_at	At1g17745	0.321934	0.149381	0.368157	0.143717	0.77707	0.969274		NS	NS	NS		5.24546	5.53664	5.53688	5.17138		unknown protein ; supported by full-length cDNA: Ceres: 20582.
259400_at	At1g17750	0.39479	0.173123	0.178803	0.216999	0.850602	0.662205		NS	NS	NS		3.57293	3.49909	3.45419	3.58897		receptor-like protein kinase, putative similar to receptor-like protein kinase INRPK1 GI:1684913 from [Ipomoea nil]
259401_at	At1g17760	0.0520501	0.781955	0.101432	0.327077	0.279634	0.0217921		NS	NS	NS		4.87487	5.04812	5.03842	4.97213		hypothetical protein contains similarity to suppressor of forked protein
255906_at	At1g17790	0.0215569	0.610189	0.0571605	0.620417	0.0318972	0.773956		NS	NS	NS		4.49317	4.74335	4.73295	4.85149		hypothetical protein similar to RING3-like bromodomain protein GI:3033386 from [Arabidopsis thaliana]; supported by cDNA: gi_15810438_gb_AY056258.1_
255896_at	At1g17800	0.0415102	0.689717	0.419938	0.947003	0.689451	0.0431971		NS	NS	NS		3.17484	3.29102	3.23407	3.20785		basic blue protein, putative similar to basic blue protein GI:6688810 from [Medicago sativa]
255905_at	At1g17810	0.125354	0.978674	0.814747	0.177044	0.453853	0.222806		NS	NS	NS		3.89714	4.00758	3.91353	3.96477		tonoplast intrinsic protein, putative similar to tonoplast intrinsic protein GI:21054 from [Phaseolus vulgaris]; supported by cDNA: gi_2605713_gb_AF026275.1_AF026275
255900_at	At1g17830	0.628426	0.409623	0.848574	0.957875	0.933011	0.297796		NS	NS	NS		3.4202	3.36794	3.44139	3.42926		hypothetical protein predicted by genemark.hmm;supported by full-length cDNA: Ceres:37923.
255889_at	At1g17840	0.00874748	0.82444	0.00597799	0.342914	0.0280105	0.411737		NS	NS	NS		8.68533	8.37231	8.37569	8.38061		ABC transporter, putative similar to ABC transporter GI:10280532 from [Homo sapiens]
255890_at	At1g17850	0.864155	0.717107	0.501502	0.880597	0.352157	0.535212		NS	NS	NS		4.60066	4.57437	4.51773	4.48236		rhodanese-like family protein predicted by genscan+
255904_at	At1g17860	0.822443	0.198074	0.794729	0.984118	0.649304	0.914962		NS	NS	NS		5.39674	5.34315	5.33555	5.28486		lemir (miraculin), putative similar to lemir (miraculin) GI:2654440 from [Lycopersicon esculentum]; supported by cDNA: gi_12083239_gb_AF332416.1_AF332416
255891_at	At1g17870	0.00859797	0.546485	0.0145979	0.0382694	0.401383	0.561866		NS	NS	NS		4.59574	4.37508	4.49843	4.49165		hypothetical protein predicted by genscan+
255902_at	At1g17880	0.521596	0.354168	0.450858	0.870852	0.400263	0.871269		NS	NS	NS		8.76776	8.71255	8.69166	8.67368		transcription factor, putative similar to transcription factor BTF3 homolog GI:2982299 from [Picea mariana];supported by full-length cDNA: Ceres:1105.
255901_at	At1g17890	0.248803	0.728933	0.581799	0.57316	0.990737	0.437425		NS	NS	NS		5.94775	5.76378	6.03837	5.94947		GDP-L-fucose synthetase, putative similar to GDP-L-fucose synthetase GI:6580725 from [Yersinia pseudotuberculosis];supported by full-length cDNA: Ceres:19576.
255897_at	At1g17900	0.739002	0.571053	0.877895	0.199468	0.967984	0.907631		NS	NS	NS		2.79692	2.76702	2.78437	2.79314		mutator-like transposase, putative similar to mutator-like transposase GI:4038062 from [Arabidopsis thaliana]
255892_at	At1g17910	0.082227	0.339575	0.695624	0.807234	0.0536706	0.0541506		NS	NS	NS		3.30239	3.53761	3.2639	3.52521		hypothetical protein contains similarity to wall-associated kinase 4 GI:3355308 from [Arabidopsis thaliana]
255907_at	At1g17920	0.0831238	0.19984	0.273307	0.0892324	0.297742	0.626537		NS	NS	NS		3.68717	3.55926	3.55841	3.58384		homeobox protein, putative similar to homeobox protein GI:1173622 from [Phalaenopsis sp. SM9108]; supported by cDNA: gi_15983359_gb_AF424554.1_AF424554
255898_at	At1g17930	0.361935	0.800941	0.448396	0.495114	0.811628	0.904307		NS	NS	NS		4.57606	4.49952	4.48614	4.53445		hypothetical protein similar to hypothetical protein GI:4559351 from [Arabidopsis thaliana];supported by full-length cDNA: Ceres:147652.
255903_at	At1g17950	0.155862	0.360029	0.303543	0.48629	0.107158	0.788361		NS	NS	NS		3.18076	3.28194	3.1249	3.29313		myb-like protein, putative similar to myb-like protein GI:6979341 from [Oryza sativa];supported by full-length cDNA: Ceres:267121.
255893_at	At1g17960	0.0930035	0.541053	0.263796	0.675732	0.23231	0.0841314		NS	NS	NS		3.23546	3.39857	3.32137	3.33786		threonyl-tRNA synthetase, putative similar to threonyl-tRNA synthetase GI:3617770 from [Arabidopsis thaliana]
255899_at	At1g17970	0.119737	0.787818	0.685567	0.819183	0.375242	0.965181		NS	NS	NS		4.89742	5.12119	4.96947	5.07336		zinc-finger protein (C-terminal), putative similar to zinc-finger protein (C-terminal) GI:558542 from [Glycine max];supported by full-length cDNA: Ceres:261272.
255894_at	At1g17980	0.416233	0.345315	0.356625	0.375409	0.697755	0.504519		NS	NS	NS		5.99052	6.09092	6.09626	6.02895		nuclear poly(A) polymerase, putative similar to nuclear poly(A) polymerase GI:7671242 from [Arabidopsis thaliana]
255895_at	At1g17990	0.0219847	0.0505352	0.0207581	0.336349	0.863316	0.819893		NS	NS	NS		7.5102	8.02029	8.21066	7.48158		12-oxophytodienoate reductase, putative similar to 12-oxophytodienoate reductase OPR1 GI:3882355 from [Arabidopsis thaliana]
255908_s_at	At1g18010	0.35465	0.0600851	0.45082	0.931459	0.0700742	0.54898		NS	NS	NS		6.94556	7.01446	7.01699	6.82729		unknown protein ;supported by full-length cDNA: Ceres:108615.
255910_at	At1g18030	0.258546	0.173361	0.292299	0.19848	0.33861	0.814347		NS	NS	NS		4.73178	4.64516	4.57337	4.62693		unknown protein contains similarity to protein phosphatase 2C GI:3777604 from [Rattus norvegicus]; supported by cDNA: gi_16226855_gb_AF428352.1_AF428352
255909_at	At1g18040	0.451136	0.903928	0.0873297	0.676665	0.643101	0.363054		NS	NS	NS		4.00241	3.90299	3.77896	3.94901		cdc2+/CDC28-related protein kinase, putative similar to cdc2+/CDC28-related protein kinase GI:20193 from [Oryza sativa]; supported by cDNA: gi_15147864_dbj_AB047274.1_AB047274
256126_at	At1g18050	0.0203857	0.877373	0.26557	0.628213	0.243068	0.945847		NS	NS	NS		3.79469	3.59274	3.68971	3.7068		hypothetical protein similar to MuDR transposable element - like protein GI:2832646 from (Arabidopsis thaliana)
256076_at	At1g18060	0.975429	0.988081	0.183645	0.5868	0.216983	0.0825148		NS	NS	NS		8.8281	8.83166	8.70031	8.9293		unknown protein ; supported by cDNA: gi_15081663_gb_AY048224.1_
256119_at	At1g18070	0.12893	0.511873	0.0127858	0.525683	0.00451497	0.80671		NS	NS	NS		7.59777	7.43165	7.37396	7.36792		guanine nucleotide regulatory protein, putative similar to guanine nucleotide regulatory protein GI:3461880 from [Mus musculus]
256072_at	At1g18080	0.0695389	0.562008	0.0537371	0.880667	0.0374334	0.37035		NS	NS	NS		9.99666	9.77632	9.81222	9.76731		WD-40 repeat protein identical to WD-40 repeat protein GI:2289095 from [Arabidopsis thaliana];supported by full-length cDNA: Ceres:7026.
256077_at	At1g18090	0.593999	0.0690432	0.163335	0.778894	0.811112	0.81772		NS	NS	NS		4.2832	4.33316	4.12916	4.25056		hypothetical protein contains similarity to exonucleases; supported by cDNA: gi_15215781_gb_AY050420.1_
256073_at	At1g18100	0.406727	0.215329	0.0271449	0.381018	0.921445	0.0948132		NS	NS	NS		3.25201	3.28304	3.09343	3.24716		terminal Flower 1 (TFL1), putative similar to terminal Flower 1 (TFL1) GI:2208929 from [Arabidopsis thaliana]; supported by cDNA: gi_12083219_gb_AF332406.1_AF332406
256120_at	At1g18130	0.205294	0.445294	0.670768	0.314223	0.879547	0.338911		NS	NS	NS		3.10726	3.2346	3.06988	3.12115		hypothetical protein contains similarity to threonyl-tRNA synthetases
256128_at	At1g18140	0.383229	0.486891	0.538069	0.388236	0.55828	0.262458		NS	NS	NS		3.21656	3.14719	3.25741	3.25683		laccase, putative similar to high-pI laccase (LAC2-1) GI:1621460 from (Liriodendron tulipifera)
256075_at	At1g18150	0.365146	0.947336	0.035314	0.153031	0.00991833	0.155763		NS	NS	NS		5.65584	5.82664	5.83119	5.87091		mitogen-activated protein kinase, putative similar to mitogen-activated protein kinase GI:5815410 from [Oryza sativa]; supported by cDNA: gi_15028216_gb_AY045931.1_
256121_at	At1g18160	0.0143792	0.783272	0.008553	0.458322	0.0056716	0.56854		NS	NS	NS		6.1759	6.43718	6.55198	6.49062		MAP kinase, putative similar to MAP3K delta-1 protein kinase GI:2253010 from [Arabidopsis thaliana]
256130_at	At1g18170	0.00156821	0.235947	0.00145104	0.661795	0.000871577	0.354845		0.00156821	NS	0.000871577		7.61729	7.31111	7.39865	7.33055		unknown protein contains Pfam profile: PF00254 FKBP-type peptidyl-prolyl cis-trans isomerases;supported by full-length cDNA: Ceres:42062.
256122_at	At1g18180	0.751223	0.995418	0.386008	0.586325	0.987015	0.16417		NS	NS	NS		3.9603	3.9275	4.07499	3.95858		hypothetical protein predicted by genscan+
256123_at	At1g18190	0.0429855	0.0847051	0.291617	0.235876	0.223405	0.743788		NS	NS	NS		4.43031	4.64396	4.33901	4.52776		hypothetical protein predicted by genscan+
256127_at	At1g18200	0.597165	0.296947	0.0264088	0.673475	0.209889	0.163785		NS	NS	NS		3.70009	3.66396	3.51778	3.78747		small GTP-binding protein (RAB11F), putative similar to small GTP-binding protein (RAB11F) GI:1370151 from (Lotus japonicus)
256129_at	At1g18210	0.0355344	0.596043	0.168292	0.825843	0.0845252	0.749419		NS	NS	NS		8.51229	8.05144	8.24359	8.1412		calcium-binding protein, putative similar to calcium-binding protein GI:6901652 from [Olea europaea];supported by full-length cDNA: Ceres:19462.
256124_at	At1g18220	0.460225	0.308684	0.740263	0.269147	0.385431	0.735515		NS	NS	NS		2.88943	2.93274	2.86592	2.99163		hypothetical protein predicted by genscan+
256125_at	At1g18250	0.337127	0.388611	0.281176	0.600709	0.143587	0.47009		NS	NS	NS		3.54345	3.68956	3.64636	3.75258		pathogenesis-related group 5 protein, putative similar to pathogenesis-related group 5 protein GI:2749943 from [Brassica rapa]; supported by cDNA: gi_536824_gb_L34693.1_ATHTLP
256074_at	At1g18260	0.0408884	0.0923683	0.00953272	0.806859	0.0280561	0.702225		NS	NS	NS		6.38197	6.60267	6.67906	6.62829		unknown protein ; supported by cDNA: gi_14532715_gb_AY039982.1_
261674_at	At1g18270	0.146122	0.577929	0.00510663	0.952413	0.0065717	0.384115		NS	NS	NS		5.44437	5.60457	5.76916	5.79971		unknown protein
261673_at	At1g18280	0.730771	0.454402	0.964456	0.348161	0.31845	0.546247		NS	NS	NS		3.59203	3.65748	3.59773	3.7163		lipid transfer protein, putative similar to lipid transfer protein GI:2627141 from (Picea abies);supported by full-length cDNA: Ceres:30040.
261675_at	At1g18290	0.196677	0.879864	0.911581	0.524003	0.926225	0.20874		NS	NS	NS		3.6263	3.48298	3.61681	3.63525		hypothetical protein predicted by genemark.hmm
261665_at	At1g18310	0.167943	0.727582	0.251051	0.027696	0.184399	0.725109		NS	NS	NS		3.63517	3.75584	3.71446	3.72824		beta-glucan-elicitor receptor, putative similar to beta-glucan-elicitor receptor GB:D78510 GI:1752733 from [Glycine max]
261664_s_at	At1g18320	0.000340394	0.295002	0.000469778	0.0546808	0.0491983	0.753565		0.000340394	0.000469778	NS		4.65202	4.21458	4.25365	4.44792		hypothetical protein contains similarity to preprotein translocase GB:AAF28359 GI:6760455 from [Mus musculus]
261663_at	At1g18330	0.0755175	0.179876	0.0597966	0.0813739	8.25345e-05	0.149584		NS	NS	8.25345e-05		4.50172	5.17944	4.82547	5.58459		hypothetical protein similar to hypothetical protein GB:AAF25987 GI:6714291 from [Arabidopsis thaliana]
261671_at	At1g18340	0.377065	0.901406	0.538704	0.871408	0.577466	0.160589		NS	NS	NS		4.83297	4.93528	4.76438	4.89374		hypothetical protein similar to hypothetical protein GB:AAF25986 GI:6714290 from [Arabidopsis thaliana];supported by full-length cDNA: Ceres:126051.
261662_at	At1g18350	0.44513	0.883686	0.861232	0.926	0.525873	0.0864923		NS	NS	NS		3.33279	3.39959	3.31828	3.37632		MAP kinase kinase 5, putative similar to MAP kinase kinase 5 GB:BAA28831 GI:3219273 from [Arabidopsis thaliana]
261661_at	At1g18360	0.0458214	0.236974	0.0452748	0.379661	0.00120101	0.29136		NS	NS	0.00120101		6.59224	7.01405	6.97545	7.36634		lysophospholipase homolog, putative similar to lysophospholipase homolog GB:AAB97366 GI:2801536 from [Oryza sativa]
261660_at	At1g18370	0.409954	0.612235	0.411182	0.577794	0.140543	0.26448		NS	NS	NS		3.28141	3.37414	3.22806	3.40881		kinesin heavy chain isolog, putative similar to kinesin heavy chain isolog GB:AAB63609 GI:2262101 from [Arabidopsis thaliana]
261719_at	At1g18380	0.703887	0.996011	0.784444	0.934215	0.778078	0.706309		NS	NS	NS		3.903	3.86266	3.93335	3.94762		hypothetical protein similar to hypothetical protein GB:AAF25996 GI:6714300 from [Arabidopsis thaliana]
261718_at	At1g18390	0.00180765	0.320614	0.0319892	0.764478	0.00488673	0.892284		0.00180765	NS	NS		4.55305	5.00782	4.87182	5.01538		wall-associated kinase, putative similar to wall-associated kinase 2 GB:CAB42872 GI:4826399 from [Arabidopsis thaliana]
261717_at	At1g18400	0.00700818	0.0343011	0.111658	0.407496	0.000984038	0.0522336		NS	NS	0.000984038		3.98954	4.35376	4.20286	4.50921		helix-loop-helix protein homolog, putative similar to helix-loop-helix protein homolog GB:BAA87957 GI:6520231 from [Arabidopsis thaliana]
261716_at	At1g18410	0.267354	0.0831002	0.711773	0.719007	0.052198	0.740597		NS	NS	NS		2.95192	2.89292	2.91826	2.8429		kinesin-related protein, putative similar to kinesin-related protein GB:AAF24855 GI:6692749 from [Arabidopsis thaliana]
261666_at	At1g18440	0.0951631	0.104441	0.173033	0.277562	0.175521	0.518243		NS	NS	NS		5.78187	5.62683	5.59219	5.65058		hypothetical protein contains similarity to peptidyl-tRNA hydrolase GB:D64003 GI:1001200 from [Synechocystis sp]
261672_at	At1g18450	0.83519	0.483192	0.485123	0.892495	0.804065	0.483234		NS	NS	NS		6.55485	6.57667	6.60132	6.53837		unknown protein contains similarity to actin-related protein GB:BAA74577 GI:4218064 from [Homo sapiens];supported by full-length cDNA: Ceres:38419.
261667_at	At1g18460	0.00328407	0.600571	0.113562	0.467803	0.00716824	0.616794		NS	NS	NS		5.49086	6.03443	5.73325	5.85891		unknown protein similar to putative lipase GB:AAF36744 GI:7109480 from [Arabidopsis thaliana]
261677_at	At1g18470	0.0839033	0.7692	0.0671563	0.38179	0.067521	0.183403		NS	NS	NS		6.65424	6.85454	6.84467	6.85695		unknown protein ;supported by full-length cDNA: Ceres:33310.
261676_at	At1g18480	0.150304	0.401585	0.315396	0.14451	0.504456	0.144117		NS	NS	NS		5.20371	5.06974	5.29741	5.14101		Expressed protein ; supported by full-length cDNA: Ceres: 107675.
261715_at	At1g18485	0.826035	0.0598665	0.593009	0.0835303	0.912474	0.200568		NS	NS	NS		4.96662	4.94468	4.91772	4.97883		hypothetical protein similar to hypothetical protein GB:AAF26001 GI:6714305 from [Arabidopsis thaliana]
261669_at	At1g18490	0.67605	0.246392	0.0360606	0.786088	0.00227693	8.80577e-05		NS	NS	0.00227693		6.36905	6.33772	6.2553	6.18797		unknown protein similar to hypothetical protein GB:AAF26001 GI:6714305 from [Arabidopsis thaliana];supported by full-length cDNA: Ceres:94234.
261668_at	At1g18500	0.040032	0.88548	0.0287002	0.84745	0.142516	0.60036		NS	NS	NS		6.29321	6.57725	6.62214	6.48847		2-isopropylmalate synthase, putative similar to 2-isopropylmalate synthase GB:AF004165 GI:2213881 from [Lycopersicon pennellii]
261714_at	At1g18510	0.28366	0.081699	0.39201	0.0056657	0.113711	0.757789		NS	NS	NS		3.40286	3.43548	3.44802	3.34867		hypothetical protein similar to hypothetical protein GB:AAF26003 GI:6714307 from [Arabidopsis thaliana]
261670_at	At1g18520	0.220875	0.716645	0.228485	0.842754	0.739017	0.122744		NS	NS	NS		3.7451	3.58084	3.58832	3.79186		hypothetical protein contains similarity to senescence-associated protein homolog GB:CAB79761 GI:7269944 from [Arabidopsis thaliana];supported by full-length cDNA: Ceres:37937.
255772_at	At1g18530	0.472443	0.0397734	0.729482	0.843224	0.19688	0.752809		NS	NS	NS		3.00906	3.04943	3.03229	3.07775		calmodulin, putative similar to calmodulin GI:1565284 from [Toxoplasma gondii]
255776_at	At1g18540	0.0138068	0.558506	0.0499449	0.797328	0.0552425	0.499275		NS	NS	NS		9.06182	8.74023	8.77312	8.7725		60S ribosomal protein L6, putative similar to 60S ribosomal protein L6 GI:7208784 from [Cicer arietinum];supported by full-length cDNA: Ceres:573.
255771_at	At1g18550	0.277598	0.131653	0.80402	0.66533	0.348198	0.333489		NS	NS	NS		3.26146	3.19008	3.27985	3.19837		hypothetical protein contains similarity to kinesin-related protein GI:4493964 from [Plasmodium falciparum]
255770_at	At1g18560	0.665065	0.00961408	0.0286325	0.222675	0.268295	0.564143		NS	NS	NS		3.81434	3.8409	3.60601	3.73689		hypothetical protein predicted by genscan+
255753_at	At1g18570	0.00692505	0.253501	0.000145048	0.0868184	0.0138837	0.498405		NS	0.000145048	NS		3.72242	4.13993	4.44254	4.11266		myb factor, putative similar to myb factor GI:1946266 from [Oryza sativa]; supported by cDNA: gi_3941465_gb_AF062887.1_AF062887
255780_at	At1g18580	0.870872	0.964457	0.408503	0.249741	0.0813716	0.0652069		NS	NS	NS		5.04663	5.06182	4.96846	4.86692		hypothetical protein contains Pfam profile: PF01501 glycosyl transferase family 8; supported by cDNA: gi_15293066_gb_AY050967.1_
255773_at	At1g18590	0.784441	0.225254	0.304642	0.752877	0.67102	0.879052		NS	NS	NS		7.05203	6.95614	7.46322	6.92985		flavonol 4 -sulfotransferase, putative similar to flavonol 4 -sulfotransferase GI:168168 from [Flaveria chloraefolia]
255775_at	At1g18600	0.118032	0.748431	0.0338154	0.552351	0.596049	0.109061		NS	NS	NS		5.96697	5.8198	5.72974	5.92111		hypothetical protein predicted by genscan+;supported by full-length cDNA: Ceres:232413.
255769_at	At1g18610	0.109123	0.570939	0.0399358	0.800364	0.0751264	0.703676		NS	NS	NS		3.6784	3.48268	3.40077	3.42861		hypothetical protein predicted by genemark.hmm
255774_at	At1g18620	0.04265	0.478703	0.105184	0.77558	0.0696671	0.783127		NS	NS	NS		6.98515	7.39225	7.24715	7.28979		unknown protein
255777_at	At1g18630	0.00420849	0.220017	0.0601231	0.0580537	0.0322418	0.54494		NS	NS	NS		5.05665	4.61819	4.87223	4.74861		glycine-rich RNA-binding protein, putative similar to glycine-rich RNA-binding protein GI:1778373 from [Pisum sativum];supported by full-length cDNA: Ceres:147819.
255778_at	At1g18640	0.944153	0.39258	0.511245	0.430521	0.130594	0.995458		NS	NS	NS		6.00471	5.99572	5.92049	5.79287		3-phosphoserine phosphatase identical to 3-phosphoserine phosphatase GI:3759177 from [Arabidopsis thaliana];supported by full-length cDNA: Ceres:34821.
255779_at	At1g18650	0.194121	0.365602	0.777415	0.36921	0.411983	0.594179		NS	NS	NS		6.16951	6.32696	6.21888	6.29677		unknown protein similar to beta-1,3-glucanase-like protein GI:9758115 from [Arabidopsis thaliana];supported by full-length cDNA: Ceres:32195.
261376_at	At1g18660	0.298594	0.0149544	0.06103	0.748984	0.594803	0.346435		NS	NS	NS		7.33326	7.23668	7.14142	7.27178		hypothetical protein contains similarity to zinc finger protein GI:1399465 from [Cryptosporidium parvum];supported by full-length cDNA: Ceres:205719.
261427_at	At1g18670	0.209513	0.259324	0.0880929	0.760071	0.0286736	0.517139		NS	NS	NS		4.83244	4.73445	4.65217	4.62236		protein kinase, putative similar to CRK1 protein GI:7671528 from [Beta vulgaris]
261426_at	At1g18680	0.671752	0.566718	0.842923	0.311155	0.539178	0.940273		NS	NS	NS		5.1934	5.25768	5.22247	5.1076		unknown protein contains similarity to DNA dependent reverse transcriptase GI:2920563 from [Spraguea lophii]
261404_at	At1g18690	0.0693162	0.0861564	0.50391	0.0446095	0.296534	0.0673847		NS	NS	NS		3.56918	3.74341	3.62009	3.65309		alpha galactosyltransferase, putative similar to alpha galactosyltransferase GI:5702018 from [Trigonella foenum-graecum]
261424_at	At1g18700	0.0873415	0.260218	0.195334	0.368043	0.103736	0.746255		NS	NS	NS		5.29822	5.5039	5.50254	5.56918		unknown protein
261431_at	At1g18710	0.00135033	0.58414	0.014165	0.405362	0.0600842	0.238338		0.00135033	NS	NS		5.32619	4.10475	4.49867	4.97409		Myb-related transcription factor mixta, putative similar to Myb-related transcription factor mixta GI:485866 from [Antirrhinum majus]
261379_at	At1g18720	0.00570631	0.946446	0.0459339	0.764787	0.839556	0.711713		NS	NS	NS		9.19366	8.98025	9.06096	9.17787		unknown protein similar to YGL010w-like protein GI:2982301 from [Picea mariana]; supported by cDNA: gi_15809883_gb_AY054209.1_
261422_at	At1g18730	0.00118472	0.524256	0.308821	0.646378	0.276544	0.455346		0.00118472	NS	NS		9.44622	9.21587	9.36607	9.38241		unknown protein
261405_at	At1g18740	0.266554	0.128968	0.136099	0.246258	0.0298397	0.455017		NS	NS	NS		6.01387	6.22469	6.41333	5.643		unknown protein ;supported by full-length cDNA: Ceres:40753.
261423_at	At1g18750	0.78903	0.0863946	0.629516	0.608958	0.737344	0.90006		NS	NS	NS		4.14837	4.16717	4.08019	4.19088		homeodomain transcription factor, putative similar to homeodomain transcription factor (AGL30) GI:3461830 from [Arabidopsis thaliana]
261406_at	At1g18800	0.00086293	0.342358	0.002567	0.0504288	0.0150561	0.274505		0.00086293	NS	NS		5.22883	4.577	4.69988	4.84249		unknown protein contains similarity to set protein GI:338038 from [Homo sapiens];supported by full-length cDNA: Ceres:27467.
261407_at	At1g18810	0.610837	0.629752	0.00522777	0.0928309	0.261007	0.386442		NS	NS	NS		5.94934	5.85759	5.60893	5.79816		unknown protein ;supported by full-length cDNA: Ceres:151637.
261430_at	At1g18830	0.649879	0.483775	0.904511	0.853978	0.232624	0.323869		NS	NS	NS		3.25044	3.29622	3.23919	3.3778		hypothetical protein predicted by genemark.hmm
261421_at	At1g18840	0.0904765	0.826078	0.239098	0.132304	0.0607626	0.781731		NS	NS	NS		4.97343	4.76021	4.8618	4.78585		hypothetical protein similar to unknown protein GI:6539269 from [Arabidopsis thaliana]
261377_at	At1g18850	0.000526036	0.336493	0.00082458	0.753625	0.000621518	0.0900388		0.000526036	0.00082458	0.000621518		5.2584	4.60775	4.65527	4.65588		unknown protein ;supported by full-length cDNA: Ceres:920.
261429_at	At1g18860	0.694867	0.130068	0.298623	0.644897	0.994769	0.706008		NS	NS	NS		2.95187	2.97526	2.88795	2.95147		hypothetical protein contains similarity to DNA-binding protein GI:1159878 from [Avena fatua]
261428_at	At1g18870	0.00433681	0.827415	0.541815	0.127435	0.000595973	0.0760799		NS	NS	0.000595973		3.99852	4.24399	4.0584	4.27322		isochorismate synthase, putative similar to isochorismate synthase GI:3348077 from [Arabidopsis thaliana]
261425_at	At1g18880	0.117954	0.526165	0.24491	0.695486	0.0601607	0.843472		NS	NS	NS		4.15763	4.35705	4.29537	4.49595		peptide transporter, putative similar to peptide transporter GI:2655098 from [Hordeum vulgare]
261378_at	At1g18890	0.262253	0.927238	0.16752	0.621882	0.359706	0.726164		NS	NS	NS		5.32239	5.12974	5.1114	5.15508		calcium-dependent protein kinase, putative similar to calcium-dependent protein kinase GI:604880 from [Arabidopsis thaliana]; supported by cDNA: gi_1235716_dbj_D21805.1_ATHCDPKA
259461_at	At1g18900	0.0813274	0.46652	0.0149362	0.316284	0.057663	0.417945		NS	NS	NS		4.95958	4.68297	4.66349	4.70219		unknown protein
259472_at	At1g18910	0.0288015	0.898805	0.998164	0.701355	0.98133	0.760575		NS	NS	NS		3.59434	3.41502	3.59413	3.59267		hypothetical protein contains similarity to flavonol-induced pollen germination protein (PGPD14) GI:4105798 from [Petunia hybrida]
259462_at	At1g18940	0.146662	0.246205	0.381839	0.64279	0.0482665	0.683556		NS	NS	NS		3.74957	3.8592	3.79248	3.86618		hypothetical protein contains similarity to nodule-specific protein GI:3329366 from [Lotus japonicus]
259463_at	At1g18950	0.0199381	0.00413904	0.421303	0.445682	0.272461	0.654869		NS	NS	NS		3.89661	4.01911	3.97603	3.94524		hypothetical protein predicted by genemark.hmm
259481_at	At1g18970	0.0332547	0.491047	0.977869	0.59522	0.0540715	0.45977		NS	NS	NS		3.73883	3.94005	3.73686	3.91486		germin, putative similar to germin GI:170697 from [Triticum aestivum]; supported by cDNA: gi_1755151_gb_U75187.1_ATU75187
259478_at	At1g18980	0.00241563	0.0908223	0.00943383	0.869557	0.677701	0.161746		0.00241563	NS	NS		3.08255	2.92344	2.995	3.10474		germin, putative similar to germin GI:170697 from [Triticum aestivum];supported by full-length cDNA: Ceres:119925.
259464_at	At1g18990	0.986667	0.30274	0.170089	0.385382	0.549563	0.0751156		NS	NS	NS		2.79248	2.79346	2.84505	2.81846		hypothetical protein predicted by genemark.hmm
259476_at	At1g19000	0.838282	0.573641	0.387362	0.825707	0.622964	0.650858		NS	NS	NS		9.1251	9.09533	9.02279	9.06372		Myb-related transcription activator, putative similar to MybSt1 GI:7705206 from [Solanum tuberosum];supported by full-length cDNA: Ceres:41381.
259480_at	At1g19010	0.786483	0.374304	0.165017	0.834226	0.779598	0.622607		NS	NS	NS		4.20282	4.23646	4.06027	4.2326		hypothetical protein predicted by genscan+; supported by full-length cDNA: Ceres: 37930.
259479_at	At1g19020	0.884182	0.619183	0.935186	0.81323	0.586227	0.503932		NS	NS	NS		4.53004	4.4744	4.49791	4.32672		Expressed protein ; supported by full-length cDNA: Ceres: 31015.
259473_at	At1g19025	0.0365474	0.202223	0.920841	0.318846	0.0469313	0.68852		NS	NS	NS		3.73185	3.57503	3.73919	3.56725		hypothetical protein predicted by genscan+;supported by full-length cDNA: Ceres:261535.
259465_at	At1g19030	0.187157	0.977963	0.768564	0.873536	0.426159	0.594584		NS	NS	NS		3.41508	3.551	3.38342	3.49017		hypothetical protein similar to putative non-LTR retroelement reverse transcriptase GI:4006833 from [Arabidopsis thaliana]
259471_at	At1g19040	0.302381	0.531631	0.420042	0.933683	0.926674	0.629075		NS	NS	NS		3.15967	3.04449	3.07887	3.17033		hypothetical protein contains similarity to NAM (no apical meristem)-like protein GI:4544462 from [Arabidopsis thaliana]
259466_at	At1g19050	0.0124007	0.0285611	0.00812892	0.270124	0.969708	0.0213108		NS	NS	NS		7.31194	7.06228	6.9507	7.31587		response regulator 5, putative similar to response regulator 5 GI:3953599 from [Arabidopsis thaliana]; supported by cDNA: gi_3953602_dbj_AB008490.1_AB008490
259467_at	At1g19060	0.989463	0.684881	0.418759	0.890967	0.470382	0.508825		NS	NS	NS		3.37281	3.37389	3.4373	3.43788		hypothetical protein predicted by genemark.hmm
259468_at	At1g19080	0.503067	0.84085	0.470224	0.691808	0.156701	0.259618		NS	NS	NS		5.42251	5.54697	5.55636	5.70154		unknown protein
259482_at	At1g19090	0.541888	0.871156	0.169734	0.466369	0.867896	0.688851		NS	NS	NS		3.37758	3.44605	3.55939	3.35852		receptor-like serine/threonine kinase, putative similar to receptor-like serine/threonine kinase GI:2465925 from [Arabidopsis thaliana]; supported by cDNA: gi_2465924_gb_AF024649.1_AF024649
259469_at	At1g19100	0.376134	0.0519498	0.660451	0.774983	0.747433	0.182447		NS	NS	NS		4.09844	4.01062	4.13916	4.06685		hypothetical protein predicted by genscan+
259470_at	At1g19110	0.249037	0.840279	0.80871	0.941909	0.635776	0.748265		NS	NS	NS		7.47084	7.57031	7.49605	7.51639		unknown protein
259477_at	At1g19120	0.197376	0.496474	0.995635	0.140407	0.74107	0.0295646		NS	NS	NS		6.77847	6.66608	6.77804	6.81791		unknown protein ;supported by full-length cDNA: Ceres:13659.
259474_at	At1g19130	0.954802	0.207734	0.748895	0.450959	0.418673	0.84343		NS	NS	NS		7.10832	7.10277	7.07611	7.19981		unknown protein ;supported by full-length cDNA: Ceres:17545.
259475_at	At1g19140	0.0232716	0.419284	0.118074	0.779091	0.126236	0.663735		NS	NS	NS		5.51815	5.07632	5.2299	5.25681		unknown protein ;supported by full-length cDNA: Ceres:37735.
256015_at	At1g19150	0.0336149	0.781413	0.0309481	0.82413	0.247031	0.624209		NS	NS	NS		10.4453	10.2278	10.1907	10.3284		PSI type II chlorophyll a/b-binding protein, putative similar to PSI type II chlorophyll a/b-binding protein GI:541565 from [Arabidopsis thaliana];supported by full-length cDNA: Ceres:252299.
256037_at	At1g19160	0.307179	0.148821	0.0483051	0.281054	0.23303	0.634512		NS	NS	NS		3.31518	3.24287	3.18497	3.38249		hypothetical protein predicted by genemark.hmm
256038_at	At1g19170	0.997579	0.305071	0.457205	0.648794	0.523962	0.192649		NS	NS	NS		4.80303	4.80345	4.89105	4.72459		hypothetical protein similar to polygalacturonase-like protein GI:10177371 from [Arabidopsis thaliana]
256017_at	At1g19180	0.456782	0.570894	0.948364	0.942634	0.872352	0.96976		NS	NS	NS		5.71969	6.1771	5.67897	5.82057		unknown protein ;supported by full-length cDNA: Ceres:38751.
256039_at	At1g19190	0.437064	0.424789	0.933532	0.510005	0.208134	0.149604		NS	NS	NS		3.26762	3.32615	3.27487	3.3778		hypothetical protein contains similarity to anther-specific and pathogenesis response protein (PrMC3) GI:5487873 from [Pinus radiata]
256014_at	At1g19200	0.868081	0.257377	0.672548	0.457134	0.0787576	0.381985		NS	NS	NS		4.99719	5.022	4.94638	5.2807		hypothetical protein predicted by genemark.hmm
256009_at	At1g19210	0.668873	0.959017	0.366196	0.00960789	0.467144	0.116999		NS	NS	NS		3.70654	3.73796	3.64211	3.78291		AP2 domain transcription factor, putative similar to AP2 domain transcription factor GI:4567204 from [Arabidopsis thaliana]
256010_at	At1g19220	0.0283166	0.0115249	0.255451	0.665782	0.119162	0.793066		NS	NS	NS		4.03953	4.35019	4.18937	4.27095		auxin response factor, putative similar to auxin response factor 7 GI:4104929 from [Arabidopsis thaliana]
256011_at	At1g19230	0.912229	0.0983077	0.912098	0.453648	0.20221	0.253378		NS	NS	NS		3.04125	3.04687	3.04793	3.14579		respiratory burst oxidase protein, putative similar to respiratory burst oxidase protein E GI:3242787 from [Arabidopsis thaliana]
256016_at	At1g19240	0.281732	0.901651	0.663407	0.161827	0.0366478	0.0592178		NS	NS	NS		5.66952	5.47631	5.63879	5.51272		hypothetical protein predicted by genscan+; supported by full-length cDNA: Ceres: 12511.
256012_at	At1g19250	0.576672	0.561334	0.805016	0.825972	0.413659	0.995632		NS	NS	NS		3.01213	3.05489	2.99396	2.94776		unknown protein similar to dimethylaniline monooxygenase (N-oxide-forming)-like protein GI:9759603 from [Arabidopsis thaliana]
256013_at	At1g19270	0.28423	0.594253	0.99161	0.826311	0.0783224	0.790357		NS	NS	NS		4.79654	4.95721	4.79815	5.04667		unknown protein
260654_at	At1g19290	0.837095	0.114507	0.351239	0.495098	0.315286	0.666718		NS	NS	NS		3.52595	3.5437	3.60302	3.44943		hypothetical protein predicted by genemark.hmm
260666_at	At1g19300	0.0483024	0.147194	0.0939874	0.922247	0.0426974	0.592605		NS	NS	NS		5.19868	4.71769	4.78246	4.61689		unknown protein ;supported by full-length cDNA: Ceres:123140.
260671_at	At1g19310	0.000626045	0.117953	0.00126582	0.655014	0.00232452	0.853529		0.000626045	NS	0.00232452		6.46653	6.90717	6.85682	6.9269		unknown protein ;supported by full-length cDNA: Ceres:1402.
260655_at	At1g19320	0.551821	0.957792	0.526193	0.984728	0.567118	0.776478		NS	NS	NS		3.53897	3.60033	3.61263	3.47963		pathogenesis-related protein 5 precursor, putative similar to SP:P28493 from [Arabidopsis thaliana]
260673_at	At1g19330	0.320593	0.771042	0.0628093	0.50361	0.0132504	0.964745		NS	NS	NS		5.62609	5.72978	5.80018	5.93913		unknown protein ; supported by full-length cDNA: Ceres: 4026.
260669_at	At1g19340	0.0443214	0.0247467	0.00501788	0.871819	0.00169709	0.420992		NS	NS	0.00169709		4.14307	4.35832	4.50111	4.66933		hypothetical protein predicted by genemark.hmm;supported by full-length cDNA: Ceres:122669.
260665_at	At1g19360	0.803721	0.42259	0.127649	0.27417	0.651217	0.0647607		NS	NS	NS		6.84174	6.81611	6.97551	6.80377		unknown protein ;supported by full-length cDNA: Ceres:41461.
260674_at	At1g19370	0.00114534	0.098955	0.0205772	0.0215707	0.000246361	0.715205		0.00114534	NS	0.000246361		6.04784	6.38712	6.21235	6.34906		unknown protein ; supported by cDNA: gi_15724243_gb_AF412062.1_AF412062
260656_at	At1g19380	0.215953	0.463404	0.263468	0.968174	0.0894518	0.647996		NS	NS	NS		5.51729	4.89629	4.95335	4.61186		hypothetical protein predicted by genemark.hmm
260657_at	At1g19390	0.865568	0.922715	0.671561	0.938221	0.885714	0.148379		NS	NS	NS		3.0576	3.07818	3.00934	3.07323		wall-associated kinase 2, putative similar to GB:CAB42872 from [Arabidopsis thaliana] (Plant Mol. Biol. 39 (6), 1189-1196 (1999))
260658_at	At1g19410	0.251265	0.618663	0.877996	0.538858	0.988378	0.475063		NS	NS	NS		3.1513	3.02913	3.16438	3.1527		hypothetical protein predicted by genemark.hmm
260675_at	At1g19430	0.476131	0.694749	0.473739	0.773948	0.614852	0.801418		NS	NS	NS		5.65238	5.77674	5.77686	5.73887		unknown protein ; supported by cDNA: gi_15810124_gb_AY056127.1_
260667_at	At1g19440	0.775042	0.638497	0.538182	0.913922	0.0537094	0.762322		NS	NS	NS		6.52709	6.45875	6.39843	6.05768		very-long-chain fatty acid condensing enzyme CUT1, putative similar to GB:AAD37122 from [Arabidopsis thaliana];supported by full-length cDNA: Ceres:158882.
260676_at	At1g19450	0.0593921	0.626323	0.244571	0.631874	0.139972	0.338187		NS	NS	NS		6.85607	7.44234	7.14658	7.22834		integral membrane protein, putative similar to GB:U43629 from [Beta vulgaris] (Plant Physiol. 110 110 (2), 511-520 (1996)); supported by cDNA: gi_16648956_gb_AY059848.1_
260659_s_at	At1g19470	0.675904	0.00314611	0.287289	0.215295	0.533381	0.0468903		NS	NS	NS		3.26334	3.29006	3.19323	3.3088		hypothetical protein predicted by genemark.hmm
260672_at	At1g19480	0.085642	0.64443	0.350358	0.277266	0.00736559	0.485804		NS	NS	NS		4.52944	4.68931	4.61901	4.78462		Expressed protein ; supported by full-length cDNA: Ceres: 36817.
260660_at	At1g19485	0.223722	0.417889	0.853637	0.462323	0.293095	0.863071		NS	NS	NS		4.90739	5.05717	4.93254	5.04333		hypothetical protein contains Pfam profile: PF00730 HhH-GPD superfamily base excision DNA repair protein
260661_at	At1g19500	0.834267	0.259701	0.0838077	0.481647	0.501957	0.0664492		NS	NS	NS		3.37785	3.38935	3.27023	3.41888		hypothetical protein predicted by genscan+
260664_at	At1g19510	0.0617737	0.180407	0.513258	0.938994	0.97322	0.399158		NS	NS	NS		4.37589	4.75653	4.29316	4.3682		myb-related protein, putative similar to GB:CAB91874 from [Lycopersicon esculentum]
260670_at	At1g19520	0.047509	0.311452	0.0891993	0.10595	0.116037	0.946892		NS	NS	NS		5.3461	5.10342	5.10947	5.15317		Expressed protein ; supported by full-length cDNA: Ceres: 13270.
260663_at	At1g19525	0.117464	0.944402	0.0258954	0.3154	0.0160581	0.104102		NS	NS	NS		5.2396	4.97669	5.08776	5.0173		hypothetical protein predicted by genscan+
260668_at	At1g19530	0.091197	0.0731866	0.465625	0.214862	0.240565	0.569583		NS	NS	NS		2.93083	3.01294	2.96161	2.98951		unknown protein ;supported by full-length cDNA: Ceres:39579.
260662_at	At1g19540	0.384697	0.26393	0.266335	0.882929	0.44171	0.675474		NS	NS	NS		3.37952	3.46707	3.48747	3.45115		2-hydroxyisoflavone reductase, putative similar to PIR:T08106 from [Betula pendula]
261149_s_at	At1g19570	0.27171	0.598096	0.81869	0.326078	0.413189	0.629609		NS	NS	NS		10.2848	10.4615	10.3196	10.4503		GSH-dependent dehydroascorbate reductase 1, putative similar to GB:BAA90672 from [Oryza sativa]; supported by full-length cDNA: Ceres: 15122.
261148_at	At1g19580	0.601669	0.55364	0.332599	0.912751	0.882543	0.565311		NS	NS	NS		6.05247	6.11309	6.17261	6.03382		unknown protein ; supported by full-length cDNA: Ceres: 12477.
261136_at	At1g19600	0.579359	0.171393	0.289319	0.760876	0.612912	0.704336		NS	NS	NS		6.39662	6.44371	6.30436	6.35261		ribokinase, putative similar to GB:AAD00536 from [Pyrobaculum aerophilum]
261135_at	At1g19610	0.941277	0.667973	0.74764	0.577393	0.723038	0.0717323		NS	NS	NS		3.22662	3.2351	3.26119	3.27022		defensin AMP1, putative similar to PIR:S66219 from [Clitoria ternatea]
261146_at	At1g19620	0.350489	0.762925	0.292394	0.654652	0.779964	0.0541316		NS	NS	NS		3.52423	3.42505	3.42042	3.55375		hypothetical protein predicted by genemark.hmm
261134_at	At1g19630	0.667841	0.481293	0.254115	0.663664	0.142351	0.422777		NS	NS	NS		3.38768	3.37177	3.44346	3.30667		cytochrome P450, putative similar to GB:CAA16713 from [Arabidopsis thaliana]
261150_at	At1g19640	0.76815	0.215062	0.0846835	0.683201	0.967444	0.156755		NS	NS	NS		3.55119	3.59592	3.33709	3.55623		floral nectary-specific protein, putative similar to GB:AAF22289 from [Brassica rapa subsp. pekinensis] (Plant Mol. Biol. 42 (4), 647-655 (2000)); supported by cDNA: gi_13676828_gb_AY008434.1_
261151_at	At1g19650	0.115699	0.0344682	0.038921	0.312568	0.000582713	0.0014261		NS	NS	0.000582713		4.9443	5.09473	5.17428	5.31191		sec14 cytosolic factor, putative similar to SP:P24859 from [Kluyveromyces lactis]; supported by cDNA: gi_15810424_gb_AY056251.1_
261144_s_at	At1g19660	0.00164567	0.917268	0.000447233	0.7892	8.79743e-05	0.280514		0.00164567	0.000447233	8.79743e-05		10.5878	11.0654	11.085	11.1633		unknown protein ;supported by full-length cDNA: Ceres:40419.
255786_at	At1g19670	0.119982	0.963815	0.0207109	0.85902	0.0469809	0.801851		NS	NS	NS		8.36854	7.8014	7.46327	7.64165		unknown protein contains similarity to chlorophyllase GI:7415999 from [Chenopodium album]; supported by full-length cDNA: Ceres: 31589.
261140_at	At1g19680	0.0195383	0.583169	0.00378763	0.720284	0.0518071	0.264722		NS	NS	NS		5.4318	5.66082	5.6765	5.59492		unknown protein
261147_at	At1g19690	0.00110203	0.718602	0.00398153	0.350663	0.0282492	0.0625854		0.00110203	NS	NS		5.68404	5.33167	5.41842	5.48536		unknown protein ;supported by full-length cDNA: Ceres:112024.
261139_at	At1g19700	0.923121	0.485807	0.841856	0.835069	0.98668	0.795839		NS	NS	NS		5.0141	5.03246	5.05303	5.01085		homeodomain protein, putative similar to homeodomain protein GI:7239157 from (Malus domestica)
261138_at	At1g19710	0.00419041	0.497227	0.0282945	0.951694	0.00761286	0.846615		NS	NS	NS		5.26456	4.89943	5.02647	4.8455		hypothetical protein contains Pfam profile: PF00534 glycosyl transferases group 1
261133_at	At1g19720	0.253441	0.086638	0.930223	0.506122	0.966072	0.124802		NS	NS	NS		6.13914	6.32545	6.15042	6.14367		DYW7 protein identical to DYW7 protein of unknown function GB:CAA06829 from [Arabidopsis thaliana] (Plant Mol. Biol. 42 (4), 603-613 (2000))
261145_at	At1g19730	3.63997e-05	0.205692	0.0280975	0.94841	4.87966e-05	0.0775899		3.63997e-05	NS	4.87966e-05		5.13832	5.534	5.42556	5.49693		thioredoxin identical to GB:CAA84610 from [Arabidopsis thaliana] (Proc. Natl. Acad. Sci. U.S.A. 92 (12), 5620-5624 (1995));supported by full-length cDNA: Ceres:9219.
261141_at	At1g19740	0.0197693	0.920172	0.0390589	0.736032	0.00244176	0.439851		NS	NS	NS		8.01918	8.28954	8.35467	8.40564		unknown protein contains Pfam profile: PF02190 ATP-dependent protease La (LON) domain
261143_at	At1g19770	0.492543	0.839585	0.151855	0.146656	0.205206	0.879885		NS	NS	NS		8.18664	8.23244	8.28132	8.30768		unknown protein
261142_at	At1g19780	0.151927	0.47507	0.0331938	0.922353	0.551202	0.851718		NS	NS	NS		2.78506	2.71447	2.90088	2.75819		cyclic nucleotide and calmodulin-regulated ion channel protein, putative similar to cyclic nucleotide and calmodulin-regulated ion channel GI:4581207 from (Arabidopsis thaliana)
261132_at	At1g19800	0.000305941	0.186969	0.00444537	0.831273	0.0126182	0.933343		0.000305941	NS	NS		7.52732	7.19915	7.23804	7.2916		hypothetical protein predicted by genemark.hmm
261137_at	At1g19830	0.82534	0.695183	0.846219	0.741619	0.735364	0.850176		NS	NS	NS		3.02078	3.03976	3.03766	2.98908		auxin-induced protein, putative similar to auxin-induced protein TGSAUR21 GI:10185818 from (Tulipa gesneriana)
261131_at	At1g19835	0.709595	0.726444	0.776215	0.483115	0.0283129	0.363166		NS	NS	NS		7.70909	7.66831	7.74795	7.3464		unknown protein
255782_at	At1g19850	0.0568317	0.880467	0.87726	0.660496	0.00525564	0.0683345		NS	NS	NS		4.11166	4.33551	4.13317	4.42014		transcription factor identical to transcription factor GI:2961085 from [Arabidopsis thaliana]; supported by cDNA: gi_2982221_gb_AF037229.1_AF037229
255784_at	At1g19860	0.488105	0.00796395	0.461577	0.404996	0.731009	0.91125		NS	NS	NS		5.88996	5.83553	5.78266	5.85472		hypothetical protein predicted by genscan+;supported by full-length cDNA: Ceres:111757.
255783_at	At1g19870	0.64634	0.327223	0.730229	0.559059	0.669902	0.358725		NS	NS	NS		6.15557	6.18607	6.1736	6.12095		hypothetical protein contains Pfam profile: PF00612 IQ calmodulin-binding motif
255781_at	At1g19880	0.726828	0.613047	0.396934	0.482985	0.935913	0.206791		NS	NS	NS		4.93432	4.90977	5.01509	4.92472		unknown protein
255815_at	At1g19890	0.152734	0.251114	0.013404	0.0744137	0.0375169	0.0179388		NS	NS	NS		3.2968	3.37869	3.4181	3.40795		histone H3, putative similar to histone H3 variant H3.3 GI:1435156 from [Lycopersicon esculentum]
255814_at	At1g19900	0.0314197	0.947357	0.75275	0.475441	0.239354	0.393421		NS	NS	NS		3.33782	3.09605	3.36706	3.21983		unknown protein
255785_at	At1g19920	3.10274e-05	0.0588256	0.00151294	0.295603	0.00329122	0.0345881		3.10274e-05	NS	NS		7.78102	7.11107	7.24854	7.21422		sulfate adenylyltransferase identical to sulfate adenylyltransferase GI:487404 from [Arabidopsis thaliana];supported by full-length cDNA: Ceres:21320.
255813_at	At1g19930	0.858798	0.742602	0.453918	0.762172	0.277929	0.113975		NS	NS	NS		3.66903	3.68515	3.59973	3.55701		hypothetical protein contains Pfam profiles: PF01344 kelch motif, PF00646 F-box domain
255756_at	At1g19940	1.73158e-05	0.913242	0.00261258	0.463928	0.000954391	0.554944		1.73158e-05	NS	0.000954391		4.1419	3.47849	3.66848	3.74957		endo-beta-1,4-D-glucanase, putative similar to endo-beta-1,4-D-glucanase GI:4165132 from [Lycopersicon esculentum]; supported by cDNA: gi_15081704_gb_AY048245.1_
261223_at	At1g19950	0.875839	0.669788	0.509557	0.735562	0.781252	0.423252		NS	NS	NS		4.33613	4.35875	4.46155	4.29725		hypothetical protein predicted by genemark.hmm;supported by full-length cDNA: Ceres:147130.
261221_at	At1g19960	0.0475984	0.432779	0.0236025	0.184865	0.307568	0.85475		NS	NS	NS		8.90066	8.4145	9.16369	9.11611		hypothetical protein predicted by genemark.hmm
261220_at	At1g19970	0.0766683	0.453558	0.428123	0.404269	0.878564	0.448366		NS	NS	NS		4.33564	4.00715	4.20065	4.36276		ER lumen protein-retaining receptor similar to SP:O44017 from [Entamoeba histolytica]
261219_at	At1g19980	0.750442	0.83261	0.079189	0.00268916	0.17249	0.0792499		NS	NS	NS		3.78224	3.75443	3.91912	3.90439		hypothetical protein predicted by genemark.hmm
261230_at	At1g20010	0.0870937	0.939593	0.711932	0.734085	0.178001	0.892196		NS	NS	NS		9.07626	9.27079	9.10612	9.19268		beta tubulin 1, putative similar to GB:AAD02498 from [Arabidopsis thaliana] (Plant Mol. Biol. 39 (1), 171-176 (1999)); supported by cDNA: gi_13605518_gb_AF361585.1_AF361585
261218_at	At1g20020	0.590865	0.242468	0.476974	0.759004	0.896869	0.674238		NS	NS	NS		11.7469	11.696	11.6934	11.7357		ferredoxin--NADP reductase precursor, putative similar to GB:M25528 from [Mesembryanthemum crystallinum]
261248_at	At1g20030	0.000163231	0.309585	0.000224676	0.818923	0.000101495	0.438391		0.000163231	0.000224676	0.000101495		4.08085	5.85842	5.36698	5.80492		calreticulin, putative similar to GB:AAF06346 from [Vitis vinifera]
261228_at	At1g20050	0.0129696	0.201369	0.427687	0.428201	0.27021	0.547545		NS	NS	NS		8.01537	7.69867	7.92555	7.85468		C-8,7 sterol isomerase identical to GB:AAD03489 from [Arabidopsis thaliana] (Plant Mol. Biol. 38 (5), 807-815 (1998));supported by full-length cDNA: Ceres:2121.
261247_at	At1g20070	0.837244	0.0568548	0.760851	0.746425	0.000423973	0.947838		NS	NS	0.000423973		6.32979	6.38205	6.23746	7.29883		hypothetical protein predicted by genemark.hmm
261246_at	At1g20080	0.0723067	0.463906	0.0964436	0.486117	0.156596	0.116176		NS	NS	NS		3.66853	3.81976	3.80347	3.82658		unknown protein
261229_at	At1g20090	0.00693028	0.089187	0.229195	0.463266	7.85514e-05	0.401882		NS	NS	7.85514e-05		7.72573	7.37534	7.50962	7.20373		RAC-like GTP-binding protein ARAC4 identical to SP:Q38919 from [Arabidopsis thaliana]; supported by cDNA: gi_1304416_gb_U45236.1_ATU45236
261225_at	At1g20100	0.0594637	0.478619	0.163853	0.424764	0.0655113	0.942884		NS	NS	NS		7.28711	7.0161	7.1423	7.08148		unknown protein ;supported by full-length cDNA: Ceres:6332.
261231_at	At1g20110	0.18778	0.995584	0.663078	0.869567	0.502806	0.82006		NS	NS	NS		7.92547	8.00737	7.94612	7.96735		unknown protein ; supported by cDNA: gi_13605832_gb_AF367315.1_AF367315
261222_at	At1g20120	0.454004	0.178284	0.949044	0.0187709	0.207912	0.973702		NS	NS	NS		3.30508	3.35081	3.30902	3.38338		anter-specific proline-rich protein APG precursor, putative similar to SP:P40602 from [Arabidopsis thaliana];supported by full-length cDNA: Ceres:22980.
261245_at	At1g20130	0.0258948	0.0480244	0.333512	0.416837	0.162667	0.0442799		NS	NS	NS		3.28564	3.42746	3.3422	3.36442		anter-specific proline-rich protein APG precursor identical to SP:P40602 from [Arabidopsis thaliana]
261244_at	At1g20150	0.110368	0.525307	0.290545	0.569037	0.510085	0.445374		NS	NS	NS		3.49852	3.41223	3.57028	3.46868		subtilisin-like serine protease similar to subtilisin-type protease precursor GI:14150446 from [Glycine max]
261224_at	At1g20160	0.0928791	0.998848	0.0415328	0.134354	0.18038	0.602005		NS	NS	NS		4.17806	4.57691	4.46057	4.32021		subtilisin-like serine protease similar to subtilisin-type protease precursor GI:14150446 from [Glycine max];supported by full-length cDNA: Ceres:3907.
261243_at	At1g20180	0.567439	0.623458	0.836073	0.396587	0.596101	0.401814		NS	NS	NS		2.82489	2.86275	2.839	2.86378		hypothetical protein predicted by genemark.hmm
261226_at	At1g20190	0.0259545	0.192457	0.0449798	0.193082	0.126931	0.901528		NS	NS	NS		7.57659	7.32247	7.2328	7.6844		expansin S2 precursor, putative similar to GB:U30460 from [Cucumis sativus];supported by full-length cDNA: Ceres:11011.
261227_at	At1g20200	0.75016	0.120422	0.73069	0.485612	0.986119	0.88604		NS	NS	NS		7.54108	7.51986	7.51831	7.53993		proteasome regulatory subunit S3, putative similar to SP:P93768 from [Nicotiana tabacum];supported by full-length cDNA: Ceres:101030.
261232_at	At1g20220	0.79992	0.815434	0.321183	0.744128	0.248664	0.834642		NS	NS	NS		6.46229	6.42699	6.31335	6.29702		unknown protein ; supported by cDNA: gi_16612273_gb_AF439833.1_AF439833
261277_at	At1g20230	0.173607	0.648137	0.770856	0.285186	0.27627	0.4665		NS	NS	NS		3.9608	4.14325	3.93943	3.88121		hypothetical protein predicted by genscan+
255883_at	At1g20270	0.946733	0.742421	0.0634134	0.514696	0.369398	0.819011		NS	NS	NS		4.23062	4.23511	4.06667	4.15864		unknown protein similar to putative prolyl 4-hydroxylase, alpha subunit GI:6598804 from [Arabidopsis thaliana];supported by full-length cDNA: Ceres:13404.
255882_x_at	At1g20280	0.529369	0.890852	0.267541	0.562217	0.817366	0.46403		NS	NS	NS		3.73928	3.69216	3.65146	3.72243		hypothetical protein contains similarity to homeobox-leucine zipper proteins
255914_at	At1g20290	0.742288	0.00229281	0.445728	0.997354	0.750889	0.00145981		NS	NS	NS		3.29262	3.3094	3.24999	3.31239		hypothetical protein predicted by genemark.hmm
255888_at	At1g20300	0.084873	0.279415	0.278183	0.955912	0.272471	0.57371		NS	NS	NS		4.29442	4.01726	4.12598	4.13947		hypothetical protein contains similarity to PF01535 PPR repeat; supported by cDNA: gi_15450346_gb_AY052274.1_
255884_at	At1g20310	0.894215	0.88219	0.235979	0.812284	0.664953	0.566644		NS	NS	NS		3.37175	3.38437	3.48737	3.33143		hypothetical protein predicted by genemark.hmm;supported by full-length cDNA: Ceres:8562.
255885_at	At1g20330	0.0205137	0.307062	0.00368288	0.917414	0.00132583	0.74058		NS	NS	0.00132583		8.72122	8.42475	8.28559	7.93643		sterol-C-methyltransferase identical to sterol-C-methyltransferase GI:1061040 from [Arabidopsis thaliana];supported by full-length cDNA: Ceres:2688.
255886_at	At1g20340	0.0129979	0.474356	0.0531577	0.560476	0.0266914	0.955489		NS	NS	NS		13.2054	13.0555	13.1005	13.0507		plastocyanin, putative similar to plastocyanin GI:1865683 from [Arabidopsis thaliana];supported by full-length cDNA: Ceres:23406.
255941_at	At1g20350	0.24609	0.537727	0.431075	0.682742	0.810372	0.355695		NS	NS	NS		3.59601	3.72785	3.50918	3.57188		mitochondrial inner membrane translocase component, putative similar to mitochondrial inner membrane translocase component Tim17a GI:4378524 from [Mus musculus]
255887_at	At1g20370	0.956618	0.766879	0.265516	0.337186	0.998401	0.653788		NS	NS	NS		3.85392	3.84675	3.73092	3.85367		hypothetical protein contains Pfam profile: PF01416 tRNA pseudouridine synthase; supported by cDNA: gi_14334543_gb_AY035176.1_
255940_at	At1g20380	0.73164	0.269287	0.216897	0.0624917	0.14412	0.964378		NS	NS	NS		4.74143	4.70626	4.58641	4.58172		prolyl endopeptidase, putative similar to prolyl endopeptidase GI:904213 from [Homo sapiens]
259573_at	At1g20390	0.490209	0.340597	0.817895	0.142012	0.305181	0.628607		NS	NS	NS		3.52572	3.57266	3.54529	3.45613		hypothetical protein
259572_at	At1g20400	0.414346	0.735919	0.0842765	0.737237	0.123177	0.180229		NS	NS	NS		3.46392	3.51513	3.57579	3.56578		hypothetical protein
259571_at	At1g20410	0.903098	0.0378625	0.756262	0.749571	0.401303	0.253893		NS	NS	NS		5.26037	5.2766	5.21958	5.16642		hypothetical protein
259515_at	At1g20430	0.851799	0.538235	0.00282642	0.104277	0.64736	0.178888		NS	NS	NS		5.01436	4.99376	5.21432	5.05225		hypothetical protein ; supported by cDNA: gi_14596112_gb_AY042844.1_
259570_at	At1g20440	0.828206	0.365566	0.274428	0.827038	0.352672	0.806828		NS	NS	NS		10.9109	10.8694	10.71	11.0994		hypothetical protein
259516_at	At1g20450	0.257767	0.728125	0.260603	0.77537	0.0258515	0.707168		NS	NS	NS		9.64124	9.91043	9.89922	10.2294		hypothetical protein ; supported by cDNA: gi_15081631_gb_AY048208.1_
259569_at	At1g20480	0.265078	0.175828	0.0505733	0.464251	0.568304	0.629764		NS	NS	NS		3.4252	3.37484	3.27274	3.47121		hypothetical protein
259568_at	At1g20490	0.302453	0.734335	0.147401	0.928647	0.167659	0.955447		NS	NS	NS		4.18574	3.85756	3.70534	3.72186		hypothetical protein
259567_at	At1g20500	0.758893	0.227511	0.606317	0.482791	0.419095	0.236965		NS	NS	NS		3.4214	3.38881	3.37091	3.33508		hypothetical protein
259518_at	At1g20510	0.924196	0.900836	0.449976	0.768795	0.65114	0.549152		NS	NS	NS		6.3896	6.41876	6.62695	6.51673		hypothetical protein ; supported by cDNA: gi_13430675_gb_AF360250.1_AF360250
259566_at	At1g20520	0.225064	0.63113	0.833518	0.350656	0.394488	0.787047		NS	NS	NS		3.28542	3.37769	3.30052	3.35769		hypothetical protein
259565_at	At1g20530	0.507883	0.64754	0.594795	0.567479	0.151613	0.729529		NS	NS	NS		3.01216	3.06076	2.96216	2.90894		hypothetical protein
259564_at	At1g20540	0.281065	0.925338	0.351868	0.89487	0.081721	0.697919		NS	NS	NS		6.84315	6.93493	6.88846	6.96944		hypothetical protein
259539_at	At1g20550	0.900189	0.410925	0.95007	0.944218	0.2948	0.361655		NS	NS	NS		3.34628	3.33632	3.34179	3.4252		axi 1 protein, putative similar to axi 1 protein GI:559920 from (Nicotiana tabacum)
259545_at	At1g20560	0.518497	0.681376	0.780833	0.651844	0.617132	0.0925264		NS	NS	NS		5.75174	5.85211	5.79207	5.82117		hypothetical protein ; supported by cDNA: gi_13937176_gb_AF372942.1_AF372942
259542_at	At1g20575	0.282977	0.759122	0.0172307	0.455845	0.520645	0.343655		NS	NS	NS		5.49704	5.62212	5.87068	5.60131		Expressed protein ; supported by full-length cDNA: Ceres: 20443.
259543_at	At1g20580	0.0232213	0.0522916	0.172761	0.07904	0.019608	0.590937		NS	NS	NS		6.65793	6.44437	6.54648	6.5122		hypothetical protein ; supported by full-length cDNA: Ceres: 27792.
259563_s_at	At1g20590	0.0127539	0.642673	0.535775	0.0763659	0.585659	0.037493		NS	NS	NS		3.03103	2.93976	3.06209	3.00822		hypothetical protein
259544_at	At1g20620	0.00118986	0.00235357	0.00593978	0.358587	0.104015	0.0646806		0.00118986	NS	NS		12.223	12.3903	12.432	12.3		hypothetical protein ; supported by full-length cDNA: Ceres: 35868.
259517_at	At1g20630	0.00130444	0.0530802	0.00036189	0.769537	7.65894e-05	0.354659		0.00130444	0.00036189	7.65894e-05		8.52373	8.88669	8.8209	8.85973		hypothetical protein ; supported by cDNA: gi_1518449_gb_U43340.1_ATU43340
259540_at	At1g20640	0.0103797	0.32637	0.0855328	0.854752	0.00572656	0.475874		NS	NS	NS		4.6021	4.99415	4.92645	5.07668		nodule inception protein, putative similar to nodule inception protein GI:6448579 from (Lotus japonicus)
259541_at	At1g20650	0.000214523	0.860931	0.000497027	0.854144	0.00015035	0.0252894		0.000214523	0.000497027	0.00015035		7.2648	7.87567	7.66398	7.72007		protein kinase, putative similar to protein kinase GI:2852447 from (Arabidopsis thaliana)
256078_at	At1g20670	0.999197	0.706754	0.571481	0.686103	0.798849	0.104709		NS	NS	NS		4.7777	4.7778	4.83184	4.75559		hypothetical protein predicted by genemark.hmm
256079_at	At1g20680	0.902059	0.402313	0.7351	0.796131	0.881505	0.421506		NS	NS	NS		3.39967	3.4139	3.44644	3.41475		hypothetical protein predicted by genscan+
256080_at	At1g20690	0.578015	0.468448	0.380944	0.695725	0.230035	0.633449		NS	NS	NS		2.8831	2.92817	2.94306	2.96528		high mobility group protein (HMG1), putative similar to high mobility group protein (HMG1) GI:436423 from [Pisum sativum]
256091_at	At1g20693	0.0279195	0.944281	0.0631774	0.642572	0.0186356	0.655003		NS	NS	NS		9.14356	9.50907	9.40855	9.57208		Expressed protein ; supported by full-length cDNA: Ceres: 11615.
256092_at	At1g20696	0.117825	0.693023	0.115099	0.889059	0.0116894	0.60328		NS	NS	NS		8.75751	8.98524	8.88282	8.99404		Expressed protein ; supported by full-length cDNA: Ceres: 11938.
256081_at	At1g20700	0.674592	0.844831	0.663251	0.933393	0.813279	0.949381		NS	NS	NS		3.54702	3.46599	3.63339	3.50223		hypothetical protein contains Pfam profile: PF00046 homeobox domain
256082_at	At1g20720	0.593165	0.785228	0.782949	0.886939	0.842568	0.40508		NS	NS	NS		3.35278	3.42601	3.39597	3.32339		hypothetical protein predicted by genscan+
256083_at	At1g20730	0.398012	0.656053	0.627955	0.770395	0.993509	0.279436		NS	NS	NS		3.58024	3.5173	3.53849	3.58092		hypothetical protein predicted by genscan+
256084_at	At1g20750	0.116096	0.48366	0.170958	0.347845	0.0466189	0.425625		NS	NS	NS		3.26157	3.14307	3.14916	3.08014		hypothetical protein predicted by genscan+
256085_at	At1g20760	0.045285	0.615559	0.433627	0.624729	0.673115	0.212406		NS	NS	NS		5.9164	6.05485	5.86938	5.94901		hypothetical protein predicted by genscan+
256086_at	At1g20770	0.289903	0.601399	0.152546	0.560275	0.108153	0.711725		NS	NS	NS		7.15622	7.06903	6.99093	6.91536		hypothetical protein predicted by genemark.hmm
256094_at	At1g20780	0.037364	0.217372	0.179344	0.241674	0.0669582	0.968454		NS	NS	NS		5.07215	4.79448	4.93355	4.87552		hypothetical protein predicted by genemark.hmm; supported by cDNA: gi_16604660_gb_AY059775.1_
256087_at	At1g20800	0.302072	0.483584	0.194694	0.112095	0.0725184	0.325299		NS	NS	NS		3.50853	3.43894	3.41009	3.34711		hypothetical protein predicted by genscan+
256088_at	At1g20810	0.524909	0.495452	0.780308	0.572622	0.189477	0.763486		NS	NS	NS		7.58414	7.66102	7.61491	7.7255		putative FKBP-type peptidyl-prolyl cis-trans isomerase predicted by genscan+
256090_at	At1g20816	0.512472	0.534286	0.0328701	0.623287	0.119298	0.329573		NS	NS	NS		4.02671	4.09394	4.28525	3.8787		predicted protein
256093_at	At1g20823	0.572211	0.276986	0.455928	0.0973179	0.411516	0.11459		NS	NS	NS		4.85292	4.91162	4.78951	4.75719		predicted protein ; supported by cDNA: gi_15027984_gb_AY045849.1_
256089_at	At1g20830	0.0125899	0.131426	0.43498	0.593121	0.356969	0.110569		NS	NS	NS		5.50204	5.22449	5.38356	5.36878		hypothetical protein predicted by genscan+
262797_at	At1g20840	0.684657	0.818751	0.774048	0.812438	0.695975	0.979706		NS	NS	NS		6.62343	6.49058	6.69162	6.52522		putative sugar transporter protein nearly identical to Arabidopsis sugar transporter, gi|1495273
262796_at	At1g20850	0.0983174	0.185465	0.0312647	0.668264	0.129254	0.553788		NS	NS	NS		6.57548	6.75	6.85368	6.85782		cysteine proteinase XCP2 identical to papain-type cysteine endopeptidase XCP2 GI:6708183 from [Arabidopsis thaliana]
262855_at	At1g20860	0.888525	0.835225	0.768012	0.411843	0.442357	0.600463		NS	NS	NS		3.64845	3.62812	3.68113	3.7356		putative inorganic phosphate transporter protein similar to GB:CAA67395
262854_at	At1g20870	0.947547	0.942973	0.382095	0.861641	0.418452	0.749918		NS	NS	NS		3.95384	3.9438	3.81558	3.81161		unknown protein
262804_at	At1g20880	0.934566	0.0469168	0.9234	0.838037	0.15655	0.858063		NS	NS	NS		4.91301	4.92255	4.92446	5.11447		putative RNA-binding protein similar to GB:AAB72160 and is the location of EST 197B1T7 , gb|AA597386; supported by cDNA: gi_15010635_gb_AY045619.1_
262853_at	At1g20890	0.153303	0.380518	0.0182782	0.937378	0.287832	0.0529345		NS	NS	NS		4.50532	4.62	4.85158	4.5892		unknown protein Location of ESTs OAO242 5 end, gb|Z30466 and OAO242 3 end, gb|Z30467
262805_at	At1g20900	0.66593	0.259141	0.826385	0.947457	0.175997	0.364109		NS	NS	NS		3.79935	3.76124	3.78382	3.68906		putative DNA-binding protein similar to GB:CAA16566 and the location of ESTs 115I5T7, gb|T43108 and H2A10T7, gb|W43561; supported by cDNA: gi_6319179_gb_AF194974.1_AF194974
262852_at	At1g20910	0.0672387	0.285926	0.779777	0.828309	0.184962	0.730816		NS	NS	NS		4.21704	4.46779	4.24379	4.33839		hypothetical protein predicted by genscan+
262851_at	At1g20920	0.481344	0.833756	0.872285	0.0340466	0.208509	0.810291		NS	NS	NS		5.51859	5.62869	5.53797	5.68131		putative RNA helicase Contains DEAD-box subfamily ATP-dependent helicases protein motif
262802_at	At1g20930	0.436101	0.595883	0.284249	0.133707	0.204997	0.201369		NS	NS	NS		4.20538	4.30183	4.33884	4.06395		putative cell division control protein, cdc2 kinase similar to GB:Q38775 and part of the cdc2-related genes that are expressed at different times during cell division;supported by full-length cDNA: Ceres:108339.
257464_at	At1g20940	0.626128	0.140046	0.730338	0.604916	0.314658	0.499034		NS	NS	NS		3.69222	3.64398	3.66616	3.75528		hypothetical protein predicted by genscan
262806_at	At1g20950	0.000154325	0.741152	0.000927609	0.515755	0.000578098	0.518594		0.000154325	0.000927609	0.000578098		7.58314	7.19468	7.38805	7.2941		putative pyrophosphate-dependent phosphofructokinase alpha subunit similar to GB:AAC67587 from [Citrus X paradisi] and GB:Q41140 from [Ricinus communis]; supported by cDNA: gi_16648970_gb_AY059855.1_
262800_at	At1g20960	0.362529	0.10665	0.397124	0.170875	0.323665	0.510014		NS	NS	NS		6.52864	6.44515	6.44468	6.44126		putative ATP-dependent RNA helicase similar to GB:AAB88651, similar to human U5 snRNP-specific 200kD protein, gi|3255965 and yeast pre-mRNA splicing helicase BRR2, gi|731380 and other RNA helicases
262799_at	At1g20970	0.452967	0.0119433	0.827606	0.1538	0.626076	0.451293		NS	NS	NS		4.26883	4.33366	4.28452	4.30506		hypothetical protein predicted by genscan
262798_at	At1g20980	0.781428	0.187454	0.252377	0.316779	0.734893	0.737811		NS	NS	NS		7.21491	7.18971	7.30383	7.18039		putative SPL1-related protein similar to GB:CAB56770, part of the SBP-box gene family that codes for transcription factors
262803_at	At1g21000	0.14924	0.827617	0.562742	0.716604	0.186662	0.483597		NS	NS	NS		5.50286	5.32477	5.57601	5.65373		unknown protein Location of ESTs 152C14T7 , gb|T88012, 173P7T7 , gb|H36502 and 107E18T7 , gb|T22775;supported by full-length cDNA: Ceres:119384.
262801_at	At1g21010	0.00892241	0.872303	0.098878	0.888823	0.000946667	0.109759		NS	NS	0.000946667		3.76182	4.39147	4.04933	4.65793		unknown protein ;supported by full-length cDNA: Ceres:17521.
261452_s_at	At1g21020	0.106855	0.309974	0.077771	0.759453	0.13008	0.344381		NS	NS	NS		3.14456	3.27217	3.28707	3.27692		hypothetical protein predicted by genemark.hmm
261456_at	At1g21050	0.130084	0.61152	0.13217	0.170759	0.337201	0.777867		NS	NS	NS		4.09012	4.22518	4.24173	4.16604		hypothetical protein predicted by genemark.hmm;supported by full-length cDNA: Ceres:3200.
261451_at	At1g21060	0.0110953	0.921112	0.0973759	0.64454	0.0529655	0.427734		NS	NS	NS		4.1122	4.51912	4.37439	4.41617		unknown protein
261457_at	At1g21065	0.995369	0.294607	0.743041	0.613245	0.310876	0.51793		NS	NS	NS		9.68338	9.68383	9.71065	9.77193		Expressed protein ; supported by full-length cDNA: Ceres: 28829.
261455_at	At1g21070	0.018991	0.00925161	0.0681827	0.497487	0.0337207	0.0452346		NS	NS	NS		4.26315	4.08136	4.08452	4.00884		unknown protein ;supported by full-length cDNA: Ceres:108746.
261458_at	At1g21080	0.0446054	0.779906	0.0705536	0.863366	0.515281	0.278354		NS	NS	NS		6.82613	6.51847	6.5509	6.74018		unknown protein contains DNA-J domain; supported by cDNA: gi_15028270_gb_AY046050.1_
261454_at	At1g21090	0.140474	0.20513	0.0993545	2.85881e-05	0.0592829	0.0709017		NS	NS	NS		3.58899	3.47871	3.64707	3.70042		hypothetical protein predicted by genemark.hmm;supported by full-length cDNA: Ceres:116544.
261459_at	At1g21100	0.384204	0.689978	0.0352598	0.383862	0.0517149	0.925873		NS	NS	NS		2.76595	2.84397	2.86743	2.89763		O-methyltransferase, putative similar to GB:AAF28353 from [Fragaria x ananassa]; supported by cDNA: gi_15982843_gb_AY057529.1_
261450_s_at	At1g21110	0.29907	0.12726	0.678123	0.237774	0.0476396	0.290054		NS	NS	NS		2.86975	2.90413	2.88527	2.80926		O-methyltransferase, putative similar to GB:AAF28353 from [Fragaria x ananassa]
261449_at	At1g21120	0.715431	0.654853	0.594269	0.90347	0.469833	0.957199		NS	NS	NS		3.09489	3.00463	2.96383	2.91418		putative ATPase similar to GB:AAF28353 from [Fragaria x ananassa]
261453_at	At1g21130	0.000433468	0.729547	0.000214951	0.769507	1.84172e-05	0.15493		0.000433468	0.000214951	1.84172e-05		6.80846	7.32084	7.37607	7.4135		O-methyltransferase, putative similar to GB:AAF28353 from [Fragaria x ananassa];supported by full-length cDNA: Ceres:101583.
261448_at	At1g21140	0.137311	0.53365	0.288116	0.467531	0.388909	0.0323808		NS	NS	NS		4.25653	4.09101	4.14493	4.37332		tonoplast intrinsic protein, alpha (alpha-TIP) simlar to GB:X16488 from [Glycine max] (Plant Mol. Biol. 14 (3), 449-451 (1990))
261447_at	At1g21160	0.0670653	0.515729	0.108018	0.0247858	0.656878	0.860023		NS	NS	NS		3.71699	3.83445	3.87736	3.74268		transcription factor, putative similar to GB:AAF36532 from [Drosophila melanogaster] (Mol. Cell 5 (1), 181-187 (2000))
261446_at	At1g21170	0.118696	0.0051266	0.0300612	0.10767	0.590881	0.260764		NS	NS	NS		3.56202	3.66505	3.70393	3.50363		unknown protein
259551_at	At1g21190	0.472012	0.227569	0.509039	0.72438	0.144411	0.299992		NS	NS	NS		4.73109	4.66192	4.66863	4.87338		hypothetical protein
259562_at	At1g21200	0.278147	0.134289	0.440809	0.186034	0.976487	0.893171		NS	NS	NS		3.97799	3.85825	3.89332	3.98122		hypothetical protein ; supported by cDNA: gi_15027986_gb_AY045850.1_
259557_at	At1g21210	0.234265	0.0778831	0.940149	0.814222	0.581921	0.327776		NS	NS	NS		2.95848	3.01029	2.95507	2.92365		hypothetical protein
259554_at	At1g21220	0.537339	0.0711249	0.0384469	0.309128	0.0182631	0.0175322		NS	NS	NS		3.45736	3.48817	3.33803	3.61875		hypothetical protein
259558_at	At1g21230	0.455208	0.507462	0.357245	0.236915	0.934925	0.98663		NS	NS	NS		2.96293	3.00637	3.01239	2.9572		hypothetical protein
259559_at	At1g21240	0.256347	0.0510893	0.751296	0.885573	0.2514	0.337378		NS	NS	NS		2.72069	2.67608	2.7078	2.67055		hypothetical protein
259561_at	At1g21250	0.0410732	0.299462	0.245343	0.325984	0.389292	0.776311		NS	NS	NS		9.08766	8.22664	9.34181	8.82537		hypothetical protein ; supported by cDNA: gi_14532585_gb_AY039917.1_
259560_at	At1g21270	0.711261	0.245189	0.0176272	0.792937	0.439407	0.631156		NS	NS	NS		7.18919	7.10328	7.69029	7.05487		hypothetical protein
259555_at	At1g21290	0.917706	0.432446	0.513857	0.901413	0.540038	0.939793		NS	NS	NS		3.28095	3.29083	3.33916	3.35297		hypothetical protein
259556_at	At1g21300	0.755205	0.447905	0.0337131	0.113583	0.092403	0.80625		NS	NS	NS		3.1631	3.17774	3.24185	3.2566		hypothetical protein
259553_x_at	At1g21310	0.352919	0.318153	0.638807	0.168192	0.063801	0.704281		NS	NS	NS		3.38401	3.46264	3.44147	3.54474		hypothetical protein
259552_at	At1g21320	0.137329	0.308507	0.753652	0.0383123	0.61503	0.177287		NS	NS	NS		3.52041	3.62016	3.49985	3.47848		hypothetical protein
260925_at	At1g21340	0.362409	0.567108	0.960171	0.564636	0.208113	0.641844		NS	NS	NS		3.6438	3.71253	3.63941	3.75098		DNA-binding protein, putative contains similaity to DNA-binding protein GB:X66076 GI:517257 from [Zea mays]
260872_at	At1g21350	0.268889	0.704182	0.527839	0.779834	0.381457	0.279731		NS	NS	NS		6.67177	6.40176	6.50856	6.44647		hypothetical protein predicted by genemark.hmm
260926_at	At1g21360	0.769637	0.479209	0.973762	0.311596	0.48921	0.259101		NS	NS	NS		2.97197	3.00713	2.96819	3.06183		unknown protein
260899_at	At1g21370	0.658251	0.647697	0.515084	0.556348	0.399925	0.359415		NS	NS	NS		5.28922	5.22405	5.38583	5.41603		hypothetical protein predicted by genemark.hmm
260880_at	At1g21380	0.982807	0.491659	0.247955	0.259668	0.0751548	0.952594		NS	NS	NS		6.97681	6.97843	7.07723	7.11908		hypothetical protein similar to unknown protein GB:AAC00635 GI:2829927 from [Arabidopsis thaliana]; supported by cDNA: gi_14334601_gb_AY034974.1_
260874_at	At1g21390	0.500205	0.415576	0.63685	0.675886	0.688277	0.472534		NS	NS	NS		3.31234	3.34432	3.33872	3.34148		hypothetical protein predicted by genemark.hmm
260900_s_at	At1g21400	0.0915815	0.858102	0.1709	0.0527734	0.000543835	0.816426		NS	NS	0.000543835		4.21944	4.3902	4.42993	4.71424		branched-chain alpha keto-acid dehydrogenase, putative similar to branched-chain alpha keto-acid dehydrogenase GB:AAC69851 GI:3822223 from [Arabidopsis thaliana]
260875_at	At1g21410	0.00315967	0.0871569	0.035759	0.163311	0.00465404	0.401641		NS	NS	NS		4.97241	5.26366	5.21237	5.44182		hypothetical protein predicted by genemark.hmm;supported by full-length cDNA: Ceres:19486.
260901_at	At1g21430	0.94371	0.36041	0.269667	0.94375	0.947084	0.973956		NS	NS	NS		3.10467	3.0996	3.19745	3.10934		flavin-containing monooxygenases, putative identical to putative flavin-containing monooxygenases GB:AAF87896 GI:9454573 from [Arabidopsis thaliana]
260902_at	At1g21440	0.00522798	0.815522	0.079243	0.678989	0.0723836	0.400282		NS	NS	NS		7.25579	7.98777	7.99467	7.57986		hypothetical protein similar to carboxyvinyl-carboxyphosphonate phosphorylmutase GB:O49290 from [Arabidopsis thaliana]
260878_at	At1g21450	0.0298225	0.244758	0.0624261	0.38262	0.0560291	0.512062		NS	NS	NS		4.58662	4.83794	4.90303	4.81782		scarecrow-like 1 identical to scarecrow-like 1 GB:AAF21043 GI:6644390 from [Arabidopsis thaliana];supported by full-length cDNA: Ceres:109490.
260876_at	At1g21460	0.201435	0.907288	0.13269	0.218116	0.311763	0.0682874		NS	NS	NS		5.45999	5.81468	5.96237	5.59394		hypothetical protein contains similarity to MTN3 (nodule development protein) GB:Y08726 GI:1619601 from [Medicago truncatula];supported by full-length cDNA: Ceres:6411.
260879_at	At1g21480	0.00710865	0.0298661	0.00136857	0.041196	0.000874094	0.420807		NS	NS	0.000874094		5.98043	5.75453	5.71672	5.69224		hypothetical protein predicted by genemark.hmm;supported by full-length cDNA: Ceres:1324.
260877_at	At1g21500	0.00123989	0.744874	0.00557488	0.212985	0.00430363	0.779872		0.00123989	NS	NS		9.07264	9.50263	9.5147	9.55298		unknown protein ; supported by full-length cDNA: Ceres: 100293.
260918_at	At1g21510	0.109993	0.215632	0.315939	0.00393707	0.711315	0.179353		NS	NS	NS		3.42348	3.29872	3.47047	3.38147		hypothetical protein predicted by genemark.hmm
260919_at	At1g21520	0.116414	0.23236	0.0134999	0.759092	0.133329	0.624808		NS	NS	NS		4.21808	4.45912	4.60661	4.45047		hypothetical protein predicted by genemark.hmm
260920_at	At1g21530	0.431495	0.48952	0.243913	0.799594	0.155928	0.470144		NS	NS	NS		3.14284	3.17113	3.20087	3.24627		amp-binding protein, putative similar to amp-binding protein GB:X94625 GI:1903033 from [Brassica napus]
260921_at	At1g21540	0.0318407	0.086633	0.0796239	0.0443831	0.444258	0.667612		NS	NS	NS		3.85193	4.04242	4.07071	3.9024		amp-binding protein, putative similar to amp-binding protein GB:X94625 GI:1903033 from [Brassica napus]
260881_at	At1g21550	0.580799	0.661172	0.563835	0.582478	0.332769	0.62208		NS	NS	NS		3.60947	3.53905	3.68061	3.7604		unknown protein contains similarity to calcium-binding protein GB:CAB63264 GI:6580549 from [Lotus japonicus]; supported by cDNA: gi_13605536_gb_AF361594.1_AF361594
260922_at	At1g21560	0.346272	0.675364	0.397572	0.883563	0.75812	0.658301		NS	NS	NS		5.61545	5.51906	5.67681	5.64762		hypothetical protein predicted by genemark.hmm
260923_at	At1g21570	0.162489	0.132913	0.943335	0.39909	0.186021	0.837305		NS	NS	NS		6.36683	6.45746	6.37171	6.49298		glycine-rich RNA-binding protein grp1a, putative similar to glycine-rich RNA-binding protein grp1a GB:L31374 GI:496232 from [Sinapis alba]
260873_at	At1g21580	0.0804302	0.836797	0.220741	0.619345	0.698158	0.856606		NS	NS	NS		4.24474	4.54854	4.42107	4.30318		hypothetical protein predicted by genscan+
260924_at	At1g21590	0.706049	0.0576063	0.224198	0.373849	0.0013143	0.689731		NS	NS	0.0013143		6.90175	6.93571	7.03773	7.40784		hypothetical protein similar to Pto kinase interactor 1 GB:AAC61805 GI:3668069 from [Lycopersicon esculentum]
262502_at	At1g21600	0.990963	0.506008	0.765573	0.968307	0.501427	0.242516		NS	NS	NS		7.64639	7.6477	7.6062	7.56016		unknown protein similar to hypothetical protein GB:AAD41412 GI:5263310 from (Arabidopsis thaliana); supported by cDNA: gi_13265575_gb_AF324715.2_AF324715
262487_at	At1g21610	0.0193219	0.59401	0.0332594	0.678782	0.00556289	0.808289		NS	NS	NS		4.71501	5.01233	5.09962	5.1519		unknown protein ESTs gb|T42839 and gb|AA395192 come from this gene
262492_at	At1g21630	0.859556	0.268808	0.848499	0.437062	0.766619	0.9909		NS	NS	NS		6.17522	6.15725	6.19459	6.20726		unknown protein Contains similarity to gb|U07707 epidermal growth factor receptor substrate (eps15) from Homo sapiens and contains 2 PF|00036 EF hand domains. ESTs gb|T44428 and gb|AA395440 come from this gene
262506_at	At1g21640	0.00669114	0.235774	0.00290815	0.88458	0.00947455	0.767673		NS	NS	NS		6.58495	7.09793	7.21925	7.1168		unknown protein Similar to gb|X84260 POS5 gene product from Saccharomyces cerevisiae. EST gb|W43879 comes from this gene; supported by cDNA: gi_12597470_gb_AF337912.1_AF337912
262491_at	At1g21650	0.0306036	0.980317	0.101241	0.146937	0.098252	0.795654		NS	NS	NS		3.94232	3.77491	3.77323	3.81706		putative SecA-type chloroplast protein transport factor Similar to gb|X82404 chloroplast SecA protein from Pisum sativum
262493_at	At1g21660	0.938857	0.641192	0.876727	0.886183	0.993752	0.041226		NS	NS	NS		6.64444	6.64976	6.6541	6.64486		auxilin-like protein similar to GB:CAB40994 from [Arabidopsis thaliana], EST gb|AA042488 comes from this gene
262503_at	At1g21670	0.000666031	0.997776	0.0043662	0.432471	0.00265712	0.381877		0.000666031	NS	NS		7.17879	7.78449	7.65033	7.70087		hypothetical protein predicted by genscan; supported by cDNA: gi_14334811_gb_AY035079.1_
262505_at	At1g21680	0.0102352	0.489116	0.0674379	0.875558	0.00714952	0.764804		NS	NS	NS		9.75511	10.2302	10.0521	10.2748		unknown protein ESTs gb|N96028, gb|F14286, gb|T20680, gb|F14443, gb|AA657300 and gb|N65244 come from this gene; supported by cDNA: gi_15028242_gb_AY046036.1_
262501_at	At1g21690	0.192548	0.497303	0.348337	0.66085	0.739107	0.427054		NS	NS	NS		5.57231	5.40108	5.45715	5.53162		putative replication factor Similar to gb|M87339 replication factor C, 37-kDa subunit from Homo sapiens and is a member of PF|00004 ATPases associated with various cellular activities;supported by full-length cDNA: Ceres:115488.
262484_at	At1g21700	0.591392	0.381433	0.531001	0.688371	0.552437	0.878077		NS	NS	NS		5.991	5.93259	6.0434	6.04599		putative transcriptional regulatory protein similar to SWI/SNF complex transcriptional regulator, GB:CAB16236 from [Schizosaccharomyces pombe], EST gb|Z25609 comes from this gene
262498_at	At1g21710	0.083052	0.227155	0.870407	0.342306	0.942587	0.183789		NS	NS	NS		4.59986	4.4223	4.58398	4.58998		8-oxoguanine DNA glycosylase-like protein Similar to gb|U96710 8-oxoguanine DNA-glycosylase from [Homo sapiens];supported by full-length cDNA: Ceres:100484.
262497_at	At1g21720	0.473886	0.918192	0.416503	0.987658	0.279496	0.574995		NS	NS	NS		7.92752	8.03807	8.03213	8.04634		putative 20S proteasome beta subunit PBC2 almost identical to GB:AAC32069 from [Arabidopsis thaliana], EST gb|T76747 comes from this gene;supported by full-length cDNA: Ceres:15624.
262485_at	At1g21730	0.0232354	0.553367	0.0319084	0.326776	0.213965	0.184125		NS	NS	NS		3.70589	3.95427	3.97532	3.84691		kinesin-like protein Similar to gb|U06698 neuronal kinesin heavy chain from Homo sapiens and contains a PF|00225 Kinesin motor domain. EST gb|AA042507 comes from this gene
262486_at	At1g21740	0.425082	0.664309	0.750724	0.2046	0.282575	0.722627		NS	NS	NS		3.96974	4.08243	4.02608	4.12228		putative bzip-like transcription factor similar to GB:AAB81673, EST gb|T20649 comes from this gene
262504_at	At1g21750	0.948872	0.655104	0.746713	0.628834	0.718899	0.574561		NS	NS	NS		8.3778	8.38518	8.42425	8.42435		putative protein disulfide isomerase precursor Similar to gb|Z11499 protein disulfide isomerase from Medicago sativa. ESTs gb|AI099693, gb|R65226, gb|AA657311, gb|T43068, gb|T42754, gb|T14005, gb|T76445, gb|H36733, gb|T43168 and gb|T20649 come from this gene
[truncated: 20,951 more rows]
