# Supplementary material for: A Systems Biology Approach Identifies a R2R3 MYB Gene Subfamily with Distinct and Overlapping Functions in Regulation of Aliphatic Glucosinolates
Source: PLoS One. 2007 Dec 19;2(12):e1322. doi: 10.1371/journal.pone.0001322 (PMC2147653; doi:10.1371/journal.pone.0001322)
Supplement: Table S14 — Foliar DoubleKO Stats (0.02 MB XLS) [file pone.0001322.s015.xls]

## Sheet: Table S14 -foliar DoubleKO S
Table S14. ANOVAs Comparing Foliar Glucosinolates in homozygous MYB28 and MYB29 double KO lines.
The table shows ANOVA for a difference in foliar glucosinolate content between Col-0 and homozygous knockouts mutants (myb28-1, myb29-1, myb28-1 myb29-1). Each line shows the ANOVA for the glucosinolate using the abbreviations listed in Supplemental Table 6. For the ANOVAs, Total model Sums-of-Squares (Total SS), individual factor Sums-of-Squares (SS), individual factor F values and P values are …
			MYB28				MYB29				MYB28 x MYB29
Trait	TotalSS		SS	F	P		SS	F	P		SS	F	P
4MTB	0.7757		0.10399	23.15	<0.001		0.353	78.59	<0.001		0.1114	24.8	<0.001
4MSB	11.3294		3.90531	67.94	<0.001		4.1627	72.42	<0.001		0.5143	8.95	0.0046
5MSP	0.1377		0.447	46.82	<0.001		0.0486	50.86	<0.001		0.009	0.95	NS
6MSH
7MTH	0.0032		0.00204312	129.38	<0.001		1.062e-05	0.73	NS		0.00016347	11.29	0.0016
7MSH	0.0112		0.09221	246.5	<0.001		0.0011	2.96	NS		0.00064	1.72	NS
8MTO	0.5212		0.003049	0.3	NS		0.009739	0.95	NS		0.05175	5.03	0.0394
8MSO	3.7048		2.7598	136.92	<0.001		0.0109	0.54	NS		0.00064	0.03	NS
Long Chain	5.6934		3.9592	104.58	<0.001		0.065525	1.73	NS		0.044501	1.18	NS
Short Chain	20.0122		6.3069	66.93	<0.001		8.1553	86.55	<0.001		1.0474	11.12	<0.001
Total Aliphatic	42.0316		20.74	94.35	<0.001		9.6861	45.08	<0.001		1.5223	7.08	0.009
I3M	2.8407		0.0202	0.39	NS		0.1315	2.51	NS		0.0187	0.36	NS
4MO-I3M	0.01777		3.24e-06	0.01	NS		6.11e-06	0.02	NS		6.44e-06	0.02	NS
NMO-I3M	0.08687		0.00173782	0.99	NS		0.000758	0.43	NS		7.098e-05	0.04	NS
Total Indolic	3.8645		0.03243	0.46	NS		0.1508	2.15	NS		0.0202	0.29	NS
