# Supplementary material for: A Systems Biology Approach Identifies a R2R3 MYB Gene Subfamily with Distinct and Overlapping Functions in Regulation of Aliphatic Glucosinolates
Source: PLoS One. 2007 Dec 19;2(12):e1322. doi: 10.1371/journal.pone.0001322 (PMC2147653; doi:10.1371/journal.pone.0001322)
Supplement: Table S16 — Seed DoubleKO stats (0.02 MB XLS) [file pone.0001322.s017.xls]

## Sheet: Table S16 -seed DoubleKO stats 
Table S16. ANOVAs Comparing Seed Glucosinolates in homozygous MYB28 and MYB29 double KO lines.
The table shows ANOVA for a difference in seed glucosinolate content between Col-0 and homozygous knockouts mutants (myb28-1, myb29-1, myb28-1 myb29-1). Each line shows the ANOVA for the glucosinolate using the abbreviations listed in Supplemental Table 6. For the ANOVAs, Total model Sums-of-Squares (Total SS), individual factor Sums-of-Squares (SS), individual factor F values and P values are pr…
			MYB28				MYB29				MYB28 x MYB29
Trait	TotalSS		SS	F	P		SS	F	P		SS	F	P
3BZOP	148.545		96.9191	129.69	<0.001		14	18.73	<0.001		4.3299	5.79	0.0204
4MTB	6923.49		4626.73	122.67	<0.001		549.724	14.58	<0.001		66.6027	1.77	NS
4MSB	15.4764		5.2446	39.84	<0.001		4.038	30.67	<0.001		0.317	2.41	NS
4BZOB	384.469		163.357	68.73	<0.001		57.112	24.03	<0.001		59.0751	24.86	<0.001
5MTB	59.429		45.0607	188.12	<0.001		3.26993	13.65	<0.001		0.339472	1.42	NS
6MTH	35.8712		19.5915	198	<0.001		2.9911	30.23	<0.001		9.0226	91.19	<0.001
7MTH	306.972		275.116	530.48	<0.001		3.23942	6.25	0.0163		3.38667	6.53	0.0142
7MSH	30.6827		25.5624	266.71	<0.001		0.48836	5.1	0.0291		0.510563	5.33	0.0259
8MTO	905.373		865.509	950.7	<0.001		0.031219	0.03	NS		0.222745	0.24	NS
8MSO	907.821		837.57	554.69	<0.001		2.35113	1.56	NS		0.0280175	0.02	NS
Long Chain	6786.06		6395.1	810.59	<0.001		18.189	2.31	<0.001		5.06364	0.64	NS
Short Chain	13004.8		8637.11	142.89	<0.001		1350.89	22.35	<0.001		301.538	4.99	0.031
Total Aliphatic	41238.6		33872.5	306.47	<0.001		1985.34	17.96	<0.001		349.728	3.16	0.0415
I3M	24.3218		2.27647	5.08	0.0293		0.184263	0.41	NS		2.65189	5.92	NS
